# Supplementary material for: Differential Proteomics Analysis Unraveled Mechanisms of Arma chinensis Responding to Improved Artificial Diet
Source: MDPI journal article supplement (doi:10.3390/insects13070605), 2022-07-02
Supplement: s1 [file s1]

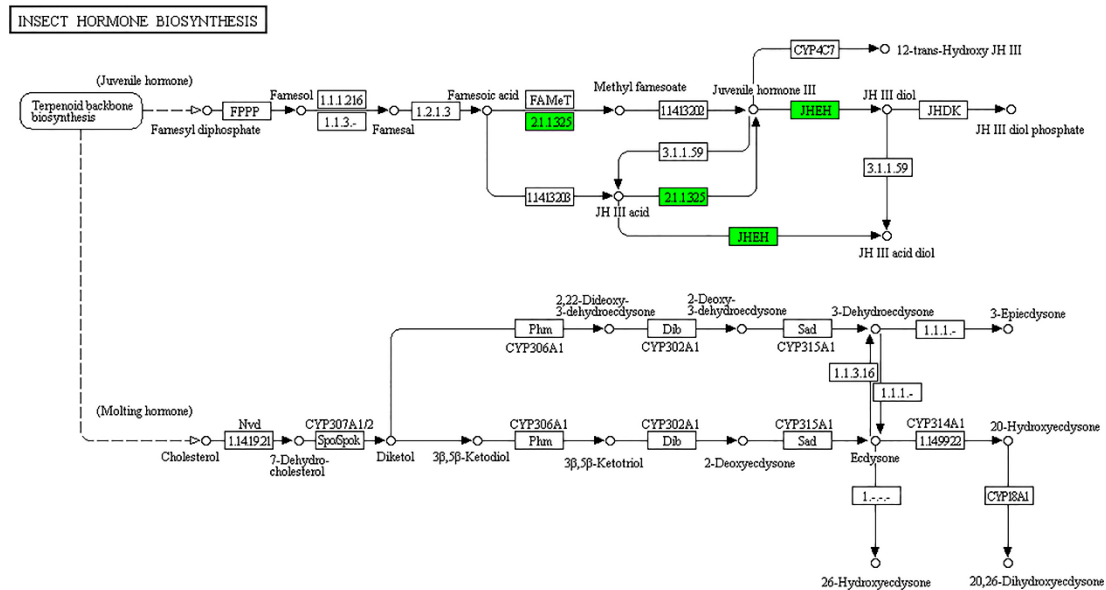

**Supplementary Figure S1.** Pathway of insect hormone biosynthesis affected by improved artificial diet feeding in adults of *Arma chinensis*. The red part indicates up-regulated proteins and the green part indicates down-regulated proteins.

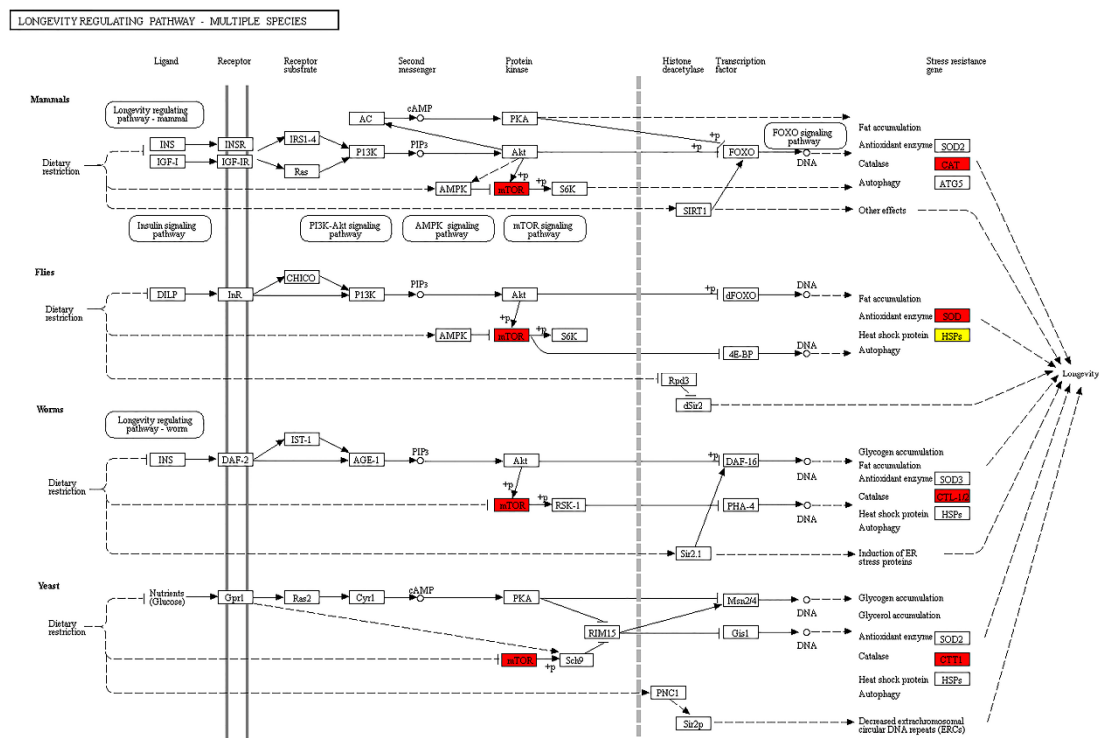

**Supplementary Figure S2.** Pathway of longevity regulating affected by improved artificial diet feeding in nymphs of *Arma chinensis*. The red part indicates up-regulated proteins and the yellow part indicates HSPs (Protein accession: Unigene17363\_All, IADN/COSMN ratio = 2.707,  $p = 0.031$ ; Protein accession: CL1793.Contig1\_All, IADN/COSMN ratio = 0.621,  $p = 0.005$ ).

## PROTEIN EXPORT

### Sec dependent pathway

#### Prokaryotic type

Translocation channel and related proteins

|        |      |      |
|--------|------|------|
| SecY   | SecE | SecG |
| SecD/F | YajC |      |
| YidC   |      |      |
| SecA   | SecB | SecM |

#### SRP

|     |     |
|-----|-----|
| Ffh | Ffs |
|-----|-----|

#### SRP receptor

|      |
|------|
| FtsY |
|------|

#### Eukaryotic type

|        |        |        |
|--------|--------|--------|
| SEC61a | SEC61b | SEC61y |
|--------|--------|--------|

|       |       |
|-------|-------|
| SEC62 | SEC63 |
|-------|-------|

|     |
|-----|
| BiP |
|-----|

|       |       |       |       |
|-------|-------|-------|-------|
| SRP9  | SRP72 | SRP19 | RN7SL |
| SRP14 | SRP68 | SRP54 |       |

|      |
|------|
| SRPR |
|------|

### Tat (twin-arginine translocation) system

#### Prokaryotic type

|      |      |      |
|------|------|------|
| TatA | TatB | TatC |
| TatE |      |      |

### Signal peptidase

#### Prokaryotic type

|         |          |
|---------|----------|
| SPase I | SPase II |
|---------|----------|

#### Eukaryotic type

|       |       |       |       |
|-------|-------|-------|-------|
| SPCS1 | SPCS2 | SPCS3 | SEC11 |
|-------|-------|-------|-------|

|      |      |
|------|------|
| IMP1 | IMP2 |
|------|------|

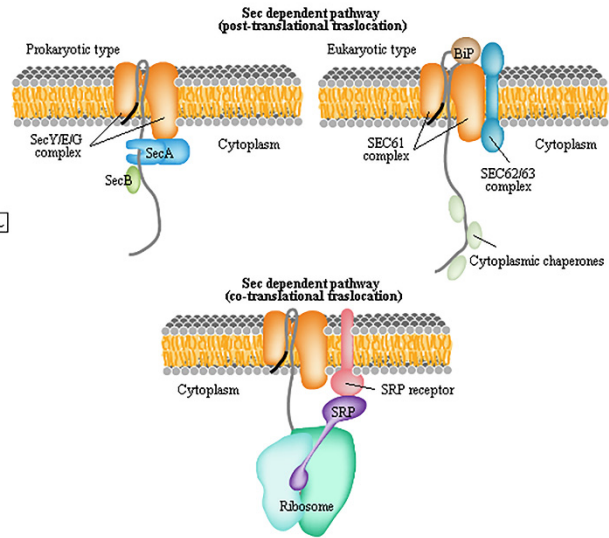

**Supplementary Figure S3.** Pathway of protein export affected by improved artificial diet feeding in nymphs of *Arma chinensis*. The green part indicates down-regulated proteins.

## BIOSYNTHESIS OF AMINO ACIDS

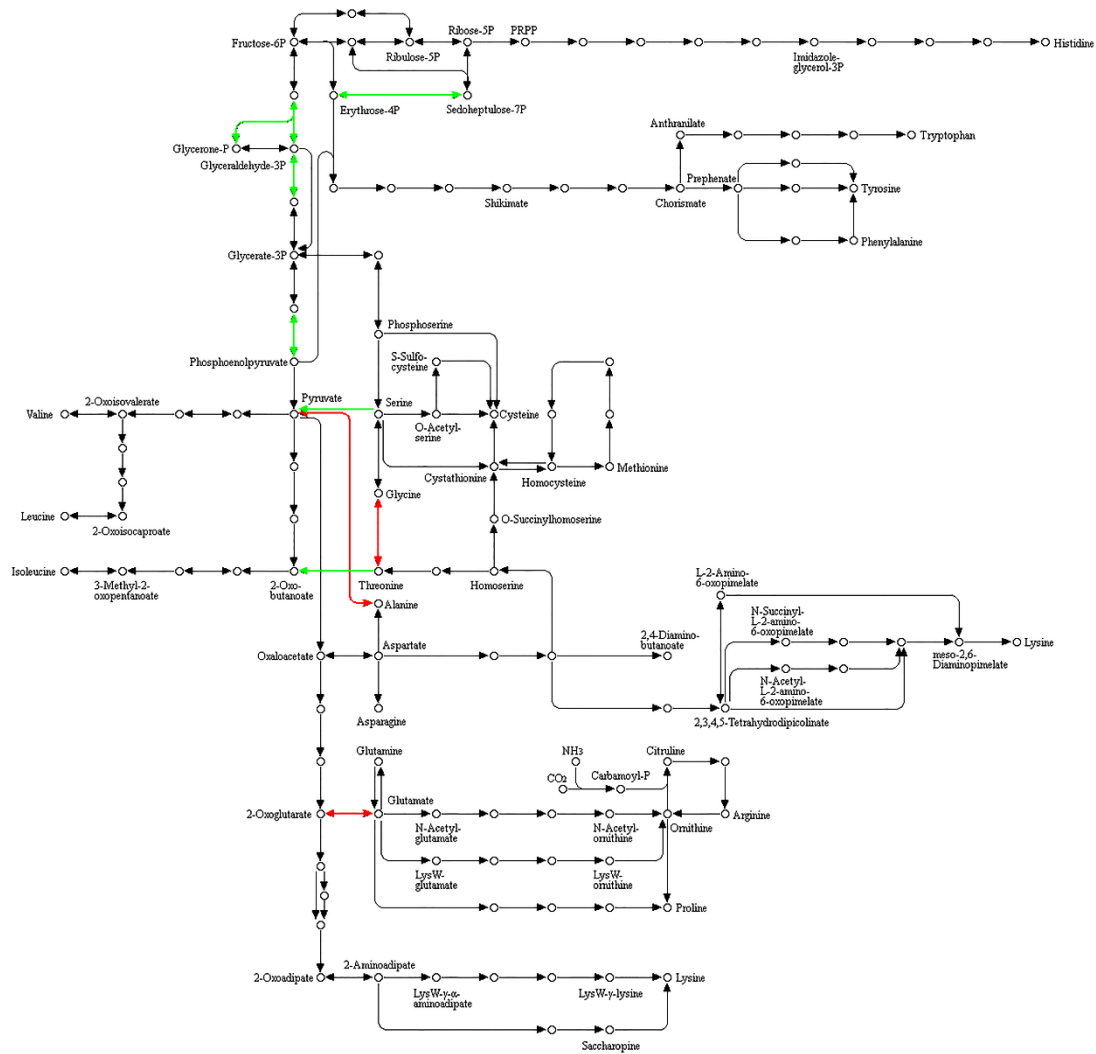





**Supplementary Figure S7.** Pathway of pentose and glucuronate interconversions affected by improved artificial diet feeding in nymphs of *Arma chinensis*. The red part indicates up-regulated proteins.

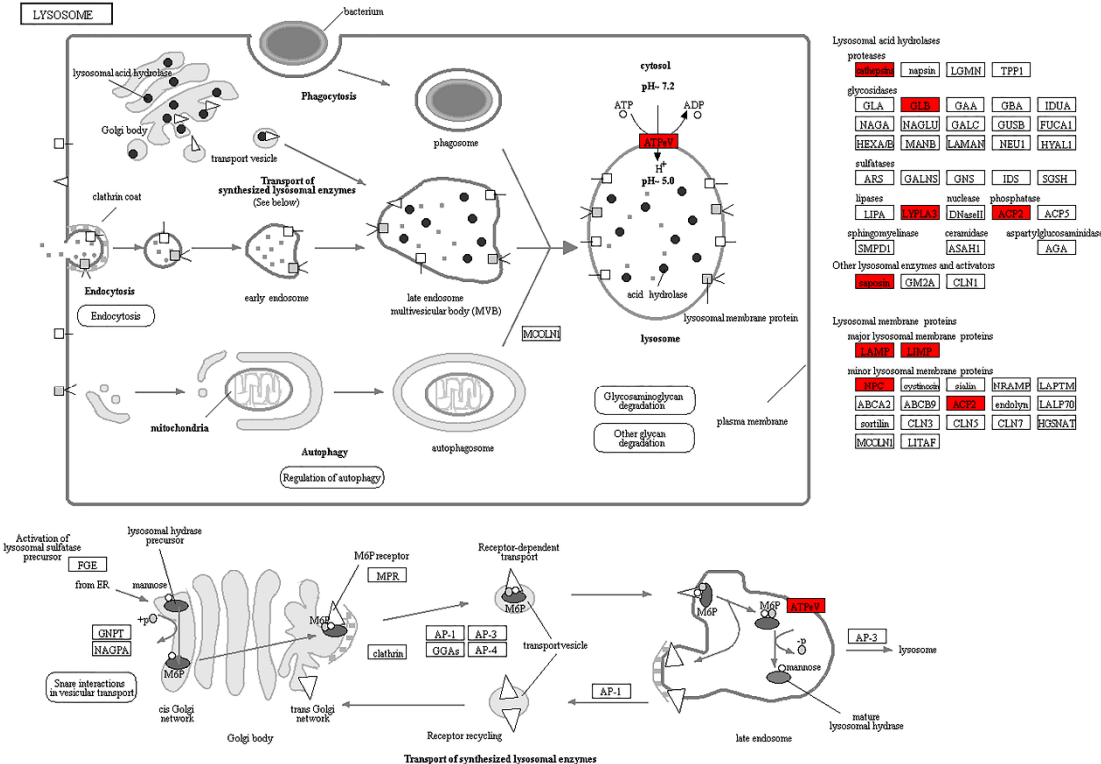

**Supplementary Figure S8.** Pathway of lysosome affected by improved artificial diet feeding in adults of *Arma chinensis*. The red part indicates up-regulated proteins.

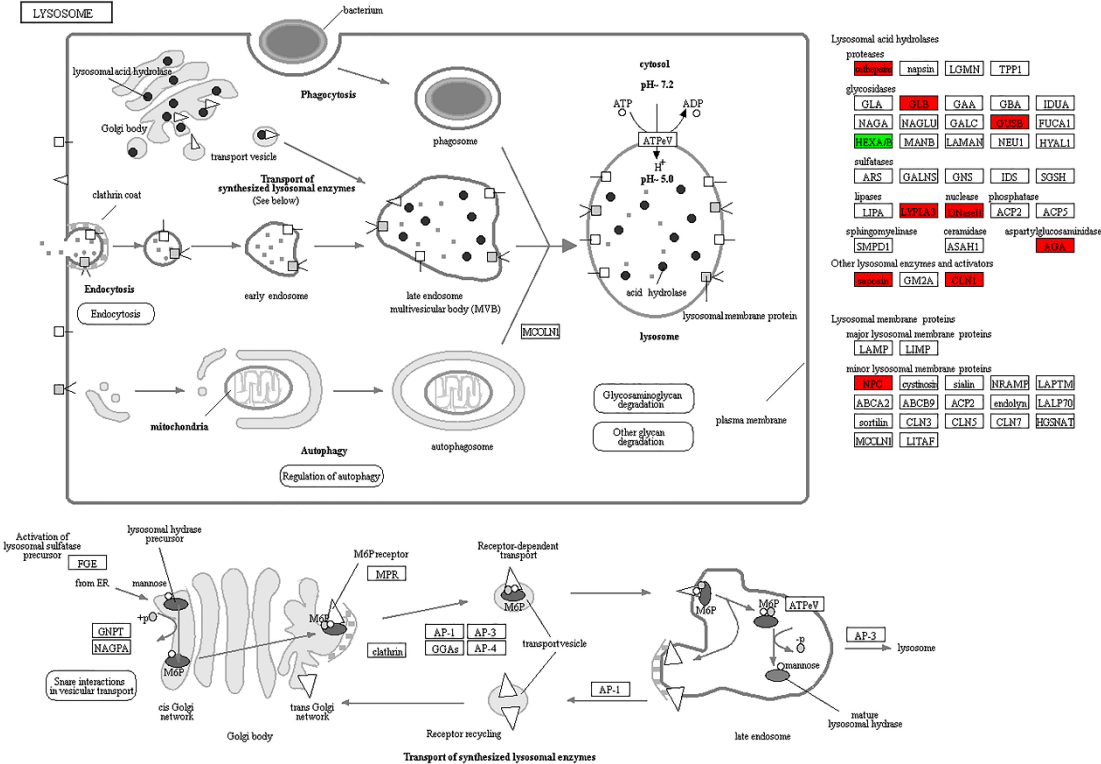



**Supplementary Figure S9.** Pathway of lysosome affected by improved artificial diet feeding in nymphs of *Arma chinensis*. The red part indicates up-regulated proteins and the green part indicates down-regulated proteins.

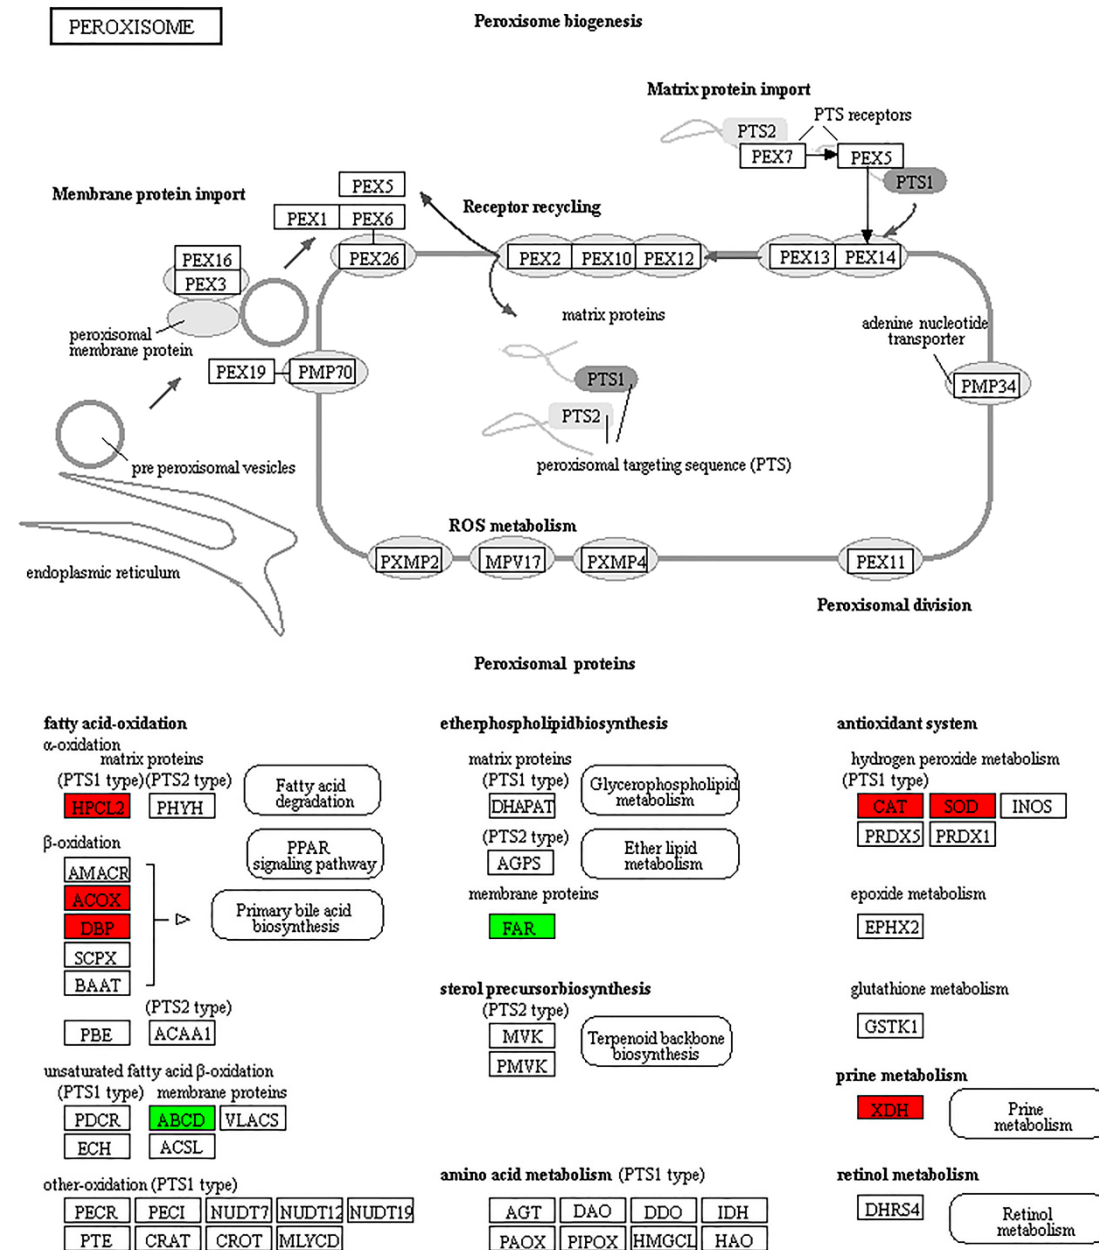

**Supplementary Figure S10.** Pathway of peroxisome affected by improved artificial diet feeding in nymphs of *Arma chinensis*. The red part indicates up-regulated proteins and the green part indicates down-regulated proteins.
