# Supplementary material for: Differential Proteomics Analysis Unraveled Mechanisms of Arma chinensis Responding to Improved Artificial Diet
Source: Insects. 2022 Jul 2;13(7):605. doi: 10.3390/insects13070605 (PMC9319121; doi:10.3390/insects13070605)
Supplement: Supplementary file 1 [file insects-13-00605-s001.zip]

Archive with 21 entries (21 files):
- Supplementary Figures.pdf
- Supplementary Table S1.xlsx
- Supplementary Table S10.xlsx
- Supplementary Table S11.xlsx
- Supplementary Table S12.xlsx
- Supplementary Table S13.xlsx
- Supplementary Table S14.xlsx
- Supplementary Table S15.xlsx
- Supplementary Table S16.xlsx
- Supplementary Table S17.xlsx
- Supplementary Table S18.xlsx
- Supplementary Table S19.xlsx
- Supplementary Table S2.xlsx
- Supplementary Table S3.xlsx
- Supplementary Table S4.xlsx
- Supplementary Table S5.xlsx
- Supplementary Table S6.xlsx
- Supplementary Table S7.xlsx
- Supplementary Table S8.xlsx
- Supplementary Table S9.xlsx
- Supplementary Text S1.pdf
