# Supplementary material for: Differential Proteomics Analysis Unraveled Mechanisms of Arma chinensis Responding to Improved Artificial Diet
Source: Insects. 2022 Jul 2;13(7):605. doi: 10.3390/insects13070605 (PMC9319121; doi:10.3390/insects13070605)
Supplement: Supplementary file 1 [file insects-13-00605-s001.zip › Supplementary Table S1.xlsx]

## Sheet: Sheet1
	Table S1. MS/MS spetrum database search analysis summary.
	Replicate	Total spectra	Matched spetra	Peptides	Unique peptides	Identified proteins	Quantifiable proteins
	Replicate 1	277664	50776	22668	21770	4653	3861
	Replicate 2	290026	57099	24980	24040	4795	3904
	Replicate 3	285040	55072	24173	23232	4747	3860
