# Supplementary material for: Differential Proteomics Analysis Unraveled Mechanisms of Arma chinensis Responding to Improved Artificial Diet
Source: Insects. 2022 Jul 2;13(7):605. doi: 10.3390/insects13070605 (PMC9319121; doi:10.3390/insects13070605)
Supplement: Supplementary file 1 [file insects-13-00605-s001.zip › Supplementary Table S2.xlsx]

## Sheet: Up Classification
Table S2. GO functional classification of the up-regulated DEPs in IADA/COSMA.
GO Terms Level 1	GO Terms Level 2	No. of Protein	Protein IDs
Biological Process	metabolic process	114	Unigene5688_All Unigene10842_All Unigene16075_All Unigene10388_All CL1335.Contig2_All Unigene1577_All Unigene20257_All CL3836.Contig1_All Unigene10007_All Unigene9903_All CL2426.Contig2_All CL1296.Contig3_All Unigene9980_All Unigene18257_All Unigene3696_All CL3702.Contig1_All CL5255.Contig1_All Unigene2103_All CL1716.Contig1_All Unigene4928_All Unigene20314_All Unigene4424_All CL1079.Contig2_All …
	single-organism process	55	Unigene6401_All CL750.Contig1_All Unigene12628_All CL3383.Contig3_All Unigene17115_All Unigene12673_All Unigene20257_All Unigene10742_All CL3965.Contig2_All Unigene14482_All Unigene9903_All CL2426.Contig2_All Unigene8465_All Unigene9980_All Unigene10540_All CL3702.Contig1_All Unigene4622_All CL3860.Contig2_All CL5228.Contig2_All Unigene4424_All CL1079.Contig2_All CL4370.Contig2_All Unigene8718_Al…
	cellular process	32	Unigene14958_All Unigene6401_All Unigene8797_All Unigene16139_All CL750.Contig1_All CL3759.Contig2_All CL5006.Contig1_All Unigene17115_All Unigene2139_All Unigene2287_All Unigene2153_All CL3173.Contig1_All Unigene15282_All Unigene14482_All Unigene10007_All CL2426.Contig2_All CL2613.Contig1_All Unigene16122_All CL1212.Contig1_All Unigene10540_All Unigene4432_All Unigene30599_All Unigene7813_All Un…
	localization	10	Unigene6441_All Unigene7780_All CL989.Contig3_All Unigene4622_All Unigene6392_All Unigene6405_All Unigene8450_All CL5228.Contig2_All CL5390.Contig1_All Unigene16080_All
	biological regulation	10	Unigene6401_All Unigene15941_All Unigene18171_All Unigene12451_All Unigene1466_All Unigene7753_All CL5228.Contig2_All Unigene8718_All Unigene1596_All Unigene15282_All
	other	8	CL914.Contig1_All Unigene6401_All CL3860.Contig2_All Unigene3339_All CL5228.Contig2_All Unigene8718_All Unigene15282_All Unigene20065_All
Cellular Component	cell	14	Unigene8797_All Unigene6441_All CL1896.Contig1_All Unigene7780_All Unigene16122_All Unigene10457_All Unigene20065_All Unigene2139_All Unigene7753_All CL5228.Contig2_All Unigene16080_All Unigene2153_All CL3173.Contig1_All Unigene1520_All
	membrane	11	Unigene6441_All Unigene7780_All Unigene13791_All Unigene6754_All CL989.Contig3_All Unigene6392_All Unigene6405_All Unigene16080_All Unigene18227_All Unigene2476_All CL3486.Contig2_All
	organelle	11	Unigene8797_All Unigene6441_All CL1896.Contig1_All Unigene16122_All Unigene10457_All Unigene20065_All Unigene2139_All CL5228.Contig2_All Unigene2153_All CL3173.Contig1_All Unigene1520_All
	extracellular region	10	Unigene14133_All Unigene17952_All Unigene20356_All Unigene16_All Unigene3696_All Unigene28901_All Unigene4928_All Unigene20314_All Unigene32074_All Unigene18191_All
	macromolecular complex	8	Unigene6441_All Unigene7780_All Unigene10457_All Unigene20065_All Unigene7753_All Unigene16080_All Unigene2153_All CL3173.Contig1_All
	membrane-enclosed lumen	2	CL3173.Contig1_All Unigene20065_All
	cytoskeleton	2	Unigene2153_All Unigene1520_All
	other	2	CL5228.Contig2_All Unigene1520_All
Molecular Function	catalytic activity	128	Unigene10842_All Unigene16075_All Unigene1577_All Unigene20257_All Unigene9903_All CL2426.Contig2_All CL1296.Contig3_All Unigene9980_All Unigene18257_All CL3702.Contig1_All Unigene3411_All Unigene2287_All Unigene2153_All Unigene3689_All Unigene3595_All CL1212.Contig1_All CL1219.Contig2_All Unigene9720_All Unigene1515_All CL743.Contig5_All Unigene16515_All Unigene13787_All Unigene12582_All Unigene…
	binding	109	Unigene31307_All Unigene5688_All Unigene10842_All Unigene30320_All Unigene1466_All Unigene6391_All Unigene20257_All Unigene17816_All Unigene19229_All CL5037.Contig1_All CL2426.Contig2_All CL2012.Contig3_All Unigene21122_All Unigene11407_All CL1226.Contig2_All Unigene3696_All Unigene16970_All CL3702.Contig1_All CL1716.Contig1_All Unigene4928_All Unigene20314_All Unigene4424_All CL1079.Contig2_All …
	structural molecule activity	6	Unigene3512_All Unigene19992_All Unigene7671_All Unigene18301_All Unigene2311_All Unigene1520_All
	other	10	Unigene14958_All Unigene6401_All Unigene6441_All Unigene20815_All CL989.Contig3_All Unigene4622_All Unigene6392_All Unigene6405_All Unigene11833_All Unigene2476_All
