# Supplementary material for: Differential Proteomics Analysis Unraveled Mechanisms of Arma chinensis Responding to Improved Artificial Diet
Source: Insects. 2022 Jul 2;13(7):605. doi: 10.3390/insects13070605 (PMC9319121; doi:10.3390/insects13070605)
Supplement: Supplementary file 1 [file insects-13-00605-s001.zip › Supplementary Table S3.xlsx]

## Sheet: Down Classification
Table S3. GO functional classification of the down-regulated DEPs in IADA/COSMA.
GO Terms Level 1	GO Terms Level 2	No. of Protein	Protein IDs
Biological Process	metabolic process	47	CL2044.Contig1_All Unigene20231_All CL3932.Contig1_All Unigene2273_All Unigene17996_All Unigene9881_All Unigene3655_All Unigene12882_All Unigene18209_All Unigene18230_All Unigene15092_All Unigene3551_All Unigene33011_All Unigene12008_All Unigene5748_All Unigene18208_All Unigene397_All Unigene16109_All Unigene14022_All Unigene10619_All Unigene7763_All Unigene23496_All Unigene20022_All Unigene5734_…
	single-organism process	32	CL1996.Contig1_All Unigene20231_All CL3558.Contig1_All Unigene2273_All Unigene17996_All Unigene9881_All Unigene3655_All Unigene18209_All Unigene15092_All Unigene33011_All Unigene18208_All Unigene7763_All Unigene5734_All CL1513.Contig3_All Unigene8757_All Unigene12651_All Unigene9915_All Unigene13998_All Unigene13880_All Unigene12587_All Unigene7775_All Unigene29886_All Unigene7773_All Unigene448_…
	cellular process	26	Unigene12651_All CL1996.Contig1_All Unigene9915_All Unigene20231_All CL3558.Contig1_All Unigene20070_All Unigene2273_All Unigene13998_All Unigene17996_All Unigene9881_All Unigene13880_All Unigene3655_All Unigene18230_All Unigene15092_All Unigene33011_All Unigene29886_All Unigene18208_All Unigene448_All Unigene17152_All Unigene14014_All Unigene397_All Unigene10619_All Unigene7760_All Unigene9891_A…
	localization	9	Unigene2526_All CL1996.Contig1_All Unigene12098_All Unigene18271_All CL1902.Contig1_All Unigene12587_All Unigene10595_All CL198.Contig2_All Unigene6577_All
	response to stimulus	5	Unigene448_All CL3558.Contig1_All Unigene17152_All Unigene32_All Unigene9891_All
	signaling	4	Unigene448_All CL3558.Contig1_All Unigene17152_All Unigene32_All
	biological regulation	4	Unigene448_All CL3558.Contig1_All Unigene17152_All Unigene32_All
Cellular Component	cell	12	Unigene448_All CL1996.Contig1_All Unigene12098_All Unigene9915_All CL3558.Contig1_All Unigene17152_All Unigene20070_All Unigene2273_All Unigene13998_All Unigene18271_All CL198.Contig2_All Unigene11931_All
	membrane	7	Unigene18269_All Unigene10595_All Unigene11940_All Unigene5625_All Unigene3655_All Unigene8763_All Unigene5691_All
	extracellular region	3	Unigene12008_All Unigene19700_All Unigene6577_All
	organelle	2	CL1996.Contig1_All Unigene11931_All
	macromolecular complex	2	Unigene9915_All Unigene2273_All
	membrane-enclosed lumen	1	CL1996.Contig1_All
Molecular Function	catalytic activity	55	CL2044.Contig1_All Unigene20231_All Unigene15050_All CL3932.Contig1_All Unigene2273_All Unigene17996_All Unigene9881_All Unigene3655_All Unigene12882_All Unigene18209_All Unigene18230_All Unigene15092_All Unigene3551_All Unigene33011_All Unigene5625_All Unigene5748_All Unigene18208_All CL3986.Contig1_All Unigene22213_All Unigene9992_All Unigene16109_All Unigene14022_All Unigene10619_All Unigene77…
	binding	40	Unigene7612_All CL3558.Contig1_All Unigene3993_All Unigene2273_All Unigene17996_All CL1902.Contig1_All Unigene18209_All Unigene18230_All Unigene33011_All Unigene6257_All Unigene14059_All Unigene12008_All Unigene22213_All Unigene397_All Unigene7763_All Unigene5691_All Unigene5734_All Unigene7760_All Unigene5851_All CL1513.Contig3_All Unigene8757_All CL1207.Contig1_All Unigene18712_All Unigene7623_…
	transporter activity	6	Unigene10595_All Unigene12587_All Unigene12098_All CL198.Contig2_All Unigene18271_All CL1902.Contig1_All
	other	3	Unigene17996_All Unigene20247_All Unigene5625_All
