# Supplementary material for: Differential Proteomics Analysis Unraveled Mechanisms of Arma chinensis Responding to Improved Artificial Diet
Source: Insects. 2022 Jul 2;13(7):605. doi: 10.3390/insects13070605 (PMC9319121; doi:10.3390/insects13070605)
Supplement: Supplementary file 1 [file insects-13-00605-s001.zip › Supplementary Table S4.xlsx]

## Sheet: Up Classification
Table S4. GO functional classification of the up-regulated DEPs in IADN/COSMN.
GO Terms Level 1	GO Terms Level 2	No. of Protein	Protein IDs
Biological Process	metabolic process	137	Unigene12066_All CL3797.Contig2_All CL4198.Contig1_All Unigene10842_All Unigene16075_All Unigene33048_All Unigene1577_All Unigene11963_All Unigene15870_All Unigene1526_All Unigene20396_All Unigene20257_All Unigene3586_All Unigene16116_All Unigene1610_All Unigene18257_All Unigene7893_All CL3702.Contig1_All Unigene18206_All CL146.Contig2_All Unigene1621_All Unigene20124_All Unigene14085_All Unigene…
	single-organism process	82	CL3797.Contig2_All CL4198.Contig1_All Unigene33048_All Unigene7913_All Unigene20256_All Unigene18963_All Unigene11963_All Unigene15870_All Unigene1526_All Unigene20257_All Unigene3586_All Unigene34324_All Unigene12032_All Unigene1610_All CL1936.Contig1_All CL3702.Contig1_All Unigene18206_All CL1079.Contig2_All Unigene8711_All Unigene20124_All Unigene14958_All Unigene20072_All CL2752.Contig2_All U…
	cellular process	47	Unigene623_All CL3797.Contig2_All Unigene2431_All CL4198.Contig1_All CL1926.Contig1_All Unigene17997_All Unigene9962_All CL750.Contig1_All Unigene15870_All CL5156.Contig1_All Unigene131_All Unigene1445_All Unigene14482_All Unigene17953_All Unigene10512_All Unigene20287_All Unigene5813_All Unigene1610_All CL760.Contig1_All Unigene7893_All Unigene20154_All Unigene1621_All Unigene9695_All Unigene201…
	biological regulation	11	Unigene17997_All CL760.Contig1_All Unigene16237_All Unigene18171_All Unigene1238_All CL3597.Contig1_All CL5156.Contig1_All Unigene9695_All Unigene10119_All Unigene1580_All Unigene1596_All
	localization	8	Unigene10798_All Unigene12032_All CL4557.Contig1_All Unigene18963_All Unigene6392_All Unigene4622_All Unigene7552_All Unigene25105_All
	other	9	CL914.Contig1_All Unigene16237_All Unigene201_All Unigene11729_All Unigene14067_All CL5156.Contig1_All Unigene10119_All Unigene4258_All Unigene17953_All
Cellular Component	cell	20	CL2199.Contig1_All Unigene623_All CL4456.Contig2_All CL4198.Contig1_All CL1926.Contig1_All Unigene201_All Unigene2139_All Unigene2153_All Unigene7552_All Unigene10119_All Unigene17953_All CL1969.Contig3_All Unigene16122_All Unigene16237_All Unigene7893_All CL3194.Contig1_All Unigene11729_All Unigene7797_All Unigene1621_All CL595.Contig1_All
	organelle	13	CL1969.Contig3_All CL4456.Contig2_All Unigene16122_All Unigene16237_All CL3194.Contig1_All Unigene201_All Unigene11729_All Unigene2139_All Unigene1621_All Unigene7797_All Unigene2153_All Unigene10119_All Unigene17953_All
	membrane	10	CL1573.Contig2_All Unigene2359_All CL4557.Contig1_All Unigene13791_All Unigene6754_All Unigene6392_All Unigene131_All Unigene10119_All Unigene25105_All Unigene2476_All
	macromolecular complex	10	CL1969.Contig3_All CL4456.Contig2_All Unigene16237_All Unigene201_All Unigene11729_All Unigene7797_All Unigene1621_All Unigene2153_All Unigene10119_All Unigene17953_All
	cytoskeleton	4	CL1969.Contig3_All CL4456.Contig2_All Unigene2153_All Unigene16237_All
	extracellular region	4	Unigene14085_All Unigene14133_All Unigene32074_All Unigene28901_All
	other	1	Unigene17953_All
Molecular Function	catalytic activity	143	Unigene12066_All CL4198.Contig1_All Unigene10842_All Unigene16075_All Unigene33048_All Unigene1577_All Unigene11963_All Unigene15870_All Unigene1526_All Unigene20396_All Unigene20257_All Unigene16116_All Unigene1610_All Unigene18257_All Unigene7893_All CL3702.Contig1_All Unigene18206_All CL146.Contig2_All Unigene20124_All Unigene16241_All Unigene14063_All Unigene3411_All Unigene14979_All CL4782.C…
	binding	118	Unigene6747_All Unigene12066_All CL4198.Contig1_All Unigene10842_All Unigene9962_All Unigene17035_All Unigene32887_All Unigene20256_All Unigene11963_All Unigene16762_All Unigene20257_All Unigene3586_All Unigene9866_All Unigene17816_All Unigene19229_All CL1573.Contig2_All Unigene18190_All Unigene21122_All Unigene5616_All CL1936.Contig1_All CL3702.Contig1_All Unigene32908_All Unigene18206_All CL107…
	structural molecule activity	8	Unigene2320_All Unigene7560_All CL2094.Contig1_All Unigene7671_All Unigene20293_All Unigene1621_All Unigene2311_All Unigene1454_All
	transporter activity	7	Unigene10798_All Unigene18963_All Unigene4622_All Unigene6392_All CL4557.Contig1_All CL3194.Contig1_All Unigene25105_All
	other	9	Unigene14958_All Unigene14646_All CL3194.Contig1_All Unigene1238_All Unigene14067_All CL2972.Contig1_All Unigene4258_All Unigene2476_All Unigene11805_All
