# Supplementary material for: Differential Proteomics Analysis Unraveled Mechanisms of Arma chinensis Responding to Improved Artificial Diet
Source: Insects. 2022 Jul 2;13(7):605. doi: 10.3390/insects13070605 (PMC9319121; doi:10.3390/insects13070605)
Supplement: Supplementary file 1 [file insects-13-00605-s001.zip › Supplementary Table S5.xlsx]

## Sheet: Down Classification
Table S5. GO functional classification of the down-regulated DEPs in IADN/COSMN.
GO Terms Level 1	GO Terms Level 2	No. of Protein	Protein IDs
Biological Process	metabolic process	65	Unigene14051_All Unigene6972_All Unigene37139_All CL3932.Contig1_All Unigene19732_All Unigene20699_All Unigene13854_All Unigene7919_All CL4264.Contig3_All Unigene20636_All Unigene3551_All Unigene17279_All CL3154.Contig1_All Unigene3554_All Unigene16061_All Unigene9901_All Unigene8530_All Unigene7845_All Unigene17097_All Unigene14022_All Unigene362_All CL60.Contig2_All Unigene19067_All Unigene1556…
	cellular process	51	CL2999.Contig2_All Unigene14051_All CL1996.Contig1_All Unigene37139_All Unigene20070_All Unigene19732_All CL95.Contig1_All Unigene18871_All Unigene20699_All Unigene13854_All CL331.Contig1_All Unigene25727_All Unigene17279_All Unigene439_All Unigene3554_All Unigene20694_All Unigene10619_All CL3793.Contig4_All CL2905.Contig2_All Unigene19067_All Unigene1556_All CL3526.Contig1_All Unigene7889_All Un…
	single-organism process	30	CL2999.Contig2_All Unigene14051_All CL1996.Contig1_All Unigene10720_All CL3047.Contig2_All Unigene4339_All Unigene18170_All Unigene13854_All Unigene18189_All Unigene14967_All CL5389.Contig1_All Unigene1533_All Unigene37158_All Unigene448_All CL5315.Contig1_All Unigene14014_All Unigene17097_All CL60.Contig2_All CL3793.Contig4_All CL2905.Contig2_All Unigene19067_All CL2035.Contig3_All Unigene1556_A…
	localization	21	CL1996.Contig1_All Unigene8238_All Unigene4411_All Unigene4339_All Unigene18189_All Unigene5795_All Unigene37158_All Unigene32260_All Unigene3554_All Unigene10781_All Unigene7790_All Unigene7799_All Unigene15938_All Unigene10595_All Unigene6584_All Unigene17927_All CL3526.Contig1_All Unigene14734_All Unigene4507_All CL198.Contig2_All Unigene6577_All
	cellular component organization or biogenesis	8	Unigene4339_All CL95.Contig1_All CL3793.Contig4_All CL3526.Contig1_All Unigene18189_All Unigene25727_All CL4142.Contig2_All Unigene439_All
	response to stimulus	7	Unigene1531_All CL2999.Contig2_All Unigene448_All CL5315.Contig1_All CL331.Contig1_All Unigene6574_All Unigene9891_All
	biological regulation	5	CL2999.Contig2_All Unigene448_All CL5315.Contig1_All CL5353.Contig1_All Unigene14904_All
	other	3	Unigene448_All CL2999.Contig2_All CL5315.Contig1_All
Cellular Component	cell	36	CL1996.Contig1_All Unigene37139_All Unigene4411_All Unigene20070_All CL3845.Contig2_All Unigene19732_All CL95.Contig1_All Unigene20699_All Unigene11967_All CL3444.Contig6_All Unigene25727_All Unigene17279_All Unigene439_All Unigene20694_All CL3526.Contig1_All Unigene42637_All Unigene7603_All CL4142.Contig2_All CL1551.Contig2_All Unigene8238_All Unigene20274_All Unigene4339_All CL2767.Contig2_All …
	organelle	25	CL1996.Contig1_All Unigene8238_All Unigene37139_All Unigene4411_All Unigene20274_All CL3845.Contig2_All CL2767.Contig2_All Unigene19732_All CL95.Contig1_All Unigene20699_All Unigene13832_All Unigene13867_All CL3444.Contig6_All Unigene18189_All Unigene36112_All Unigene25727_All Unigene17279_All Unigene439_All Unigene20011_All Unigene6180_All Unigene20694_All Unigene11792_All Unigene42637_All Unige…
	macromolecular complex	22	Unigene8238_All Unigene37139_All CL3845.Contig2_All CL2767.Contig2_All Unigene4339_All Unigene20699_All Unigene13832_All Unigene13867_All CL3444.Contig6_All Unigene11967_All Unigene18189_All Unigene36112_All Unigene17279_All Unigene20011_All Unigene6180_All Unigene20694_All Unigene11792_All Unigene17927_All CL3526.Contig1_All Unigene7603_All Unigene42637_All CL1551.Contig2_All
	membrane	19	Unigene8238_All Unigene4411_All Unigene18871_All Unigene20699_All Unigene18189_All Unigene25727_All Unigene17100_All Unigene5795_All CL2007.Contig1_All Unigene20011_All CL5315.Contig1_All Unigene7790_All Unigene7799_All Unigene10595_All Unigene6584_All Unigene17927_All Unigene4507_All Unigene16084_All Unigene3567_All
	extracellular region	4	CL5531.Contig2_All Unigene1463_All Unigene6577_All Unigene37158_All
	other	4	CL1996.Contig1_All CL3845.Contig2_All Unigene20259_All CL3444.Contig6_All
Molecular Function	binding	82	Unigene14051_All Unigene16777_All Unigene19732_All CL95.Contig1_All Unigene3589_All CL450.Contig3_All Unigene13854_All CL3444.Contig6_All CL4264.Contig3_All Unigene5487_All CL5037.Contig1_All Unigene32260_All Unigene14706_All Unigene99_All Unigene13434_All Unigene17097_All CL3793.Contig4_All Unigene19067_All Unigene1556_All CL732.Contig1_All Unigene7889_All Unigene4507_All Unigene6663_All CL5531.…
	catalytic activity	65	Unigene357_All Unigene14051_All Unigene14094_All Unigene6972_All CL3932.Contig1_All CL3845.Contig2_All Unigene19732_All Unigene18871_All Unigene20699_All Unigene13854_All CL3444.Contig6_All Unigene7919_All CL4264.Contig3_All Unigene20636_All Unigene3551_All Unigene9907_All CL3154.Contig1_All Unigene14706_All Unigene13434_All Unigene9992_All Unigene16061_All Unigene9901_All CL272.Contig2_All Unige…
	structural molecule activity	29	CL3443.Contig1_All CL3443.Contig2_All Unigene37139_All Unigene10931_All Unigene5823_All Unigene17155_All CL1552.Contig1_All CL2908.Contig1_All CL2767.Contig2_All Unigene10803_All Unigene13832_All Unigene13867_All Unigene36112_All Unigene310_All Unigene18301_All CL2553.Contig2_All Unigene17279_All Unigene20546_All CL2553.Contig1_All Unigene6180_All Unigene10402_All Unigene20694_All CL5055.Contig1_…
	molecular function regulator	11	Unigene40526_All Unigene7767_All Unigene6574_All CL2155.Contig1_All Unigene20247_All CL4701.Contig1_All Unigene38038_All Unigene7889_All Unigene11833_All CL33.Contig1_All CL5353.Contig1_All
	transporter activity	6	Unigene10595_All Unigene17927_All Unigene4411_All Unigene7790_All CL198.Contig2_All Unigene4507_All
	other	1	CL5315.Contig1_All
