# Supplementary material for: Differential Proteomics Analysis Unraveled Mechanisms of Arma chinensis Responding to Improved Artificial Diet
Source: Insects. 2022 Jul 2;13(7):605. doi: 10.3390/insects13070605 (PMC9319121; doi:10.3390/insects13070605)
Supplement: Supplementary file 1 [file insects-13-00605-s001.zip › Supplementary Table S6.xlsx]

## Sheet: Up GO2Protein
Table S6. GO enrichment for the up-regulated DEPs in IADA/COSMA.
GO Terms Level 1	GO Terms ID	GO Terms Level	GO Terms Description	Fisher's exact test P value	Protein accession	Protein description	IADA/COSMA Ratio	Regulated Type	IADA/COSMA P value	MW [kDa]
Cellular Component	GO:0044421	3	extracellular region part	0.288117	Unigene32074_All	3 674 minus strand albumin [Sus scrofa domesticus]	3.403	Up	0.00578	25.238
Cellular Component	GO:0044421	3	extracellular region part	0.288117	Unigene28901_All	2 229 minus strand albumin [Sus scrofa]	4.611	Up	0.0354	8.5354
Cellular Component	GO:0005887	8	integral component of plasma membrane	0.218693	Unigene7780_All	8 961 minus strand Sodium/potassium-transporting ATPase subunit beta-2 [Camponotus floridanus]	1.365	Up	0.00739	36.841
Cellular Component	GO:0005887	8	integral component of plasma membrane	0.218693	Unigene16080_All	204 1130 GH10786 [Drosophila grimshawi] >gi|193904032|gb|EDW02899.1| GH10786 [Drosophila grimshawi]	1.266	Up	0.00398	35.938
Cellular Component	GO:0090533	8	cation-transporting ATPase complex	0.168817	Unigene7780_All	8 961 minus strand Sodium/potassium-transporting ATPase subunit beta-2 [Camponotus floridanus]	1.365	Up	0.00739	36.841
Cellular Component	GO:0090533	8	cation-transporting ATPase complex	0.168817	Unigene16080_All	204 1130 GH10786 [Drosophila grimshawi] >gi|193904032|gb|EDW02899.1| GH10786 [Drosophila grimshawi]	1.266	Up	0.00398	35.938
Cellular Component	GO:0043233	4	organelle lumen	0.58209	CL3173.Contig1_All	"123 833 minus strand pre-mrna cleavage factor im, 25kD subunit [Aedes aegypti] >gi|157118316|ref|XP_001653167.1| pre-mrna cleavage factor im, 25kD subunit [Aedes aegypti] >gi|108880136|gb|EAT44361.1| pre-mrna cleavage factor im, 25kD subunit [Aedes aegypti] >gi|108883290|gb|EAT47515.1| pre-mrna cleavage factor im, 25kD subunit [Aedes aegypti]"	1.267	Up	0.0029	26.843
Cellular Component	GO:0043233	4	organelle lumen	0.58209	Unigene20065_All	244 708 minus strand AGAP012204-PA [Anopheles gambiae str. PEST] >gi|55234455|gb|EAA00120.2| AGAP012204-PA [Anopheles gambiae str. PEST]	1.222	Up	0.00266	17.428
Cellular Component	GO:0031226	7	intrinsic component of plasma membrane	0.218693	Unigene7780_All	8 961 minus strand Sodium/potassium-transporting ATPase subunit beta-2 [Camponotus floridanus]	1.365	Up	0.00739	36.841
Cellular Component	GO:0031226	7	intrinsic component of plasma membrane	0.218693	Unigene16080_All	204 1130 GH10786 [Drosophila grimshawi] >gi|193904032|gb|EDW02899.1| GH10786 [Drosophila grimshawi]	1.266	Up	0.00398	35.938
Cellular Component	GO:0031981	10	nuclear lumen	0.427682	CL3173.Contig1_All	"123 833 minus strand pre-mrna cleavage factor im, 25kD subunit [Aedes aegypti] >gi|157118316|ref|XP_001653167.1| pre-mrna cleavage factor im, 25kD subunit [Aedes aegypti] >gi|108880136|gb|EAT44361.1| pre-mrna cleavage factor im, 25kD subunit [Aedes aegypti] >gi|108883290|gb|EAT47515.1| pre-mrna cleavage factor im, 25kD subunit [Aedes aegypti]"	1.267	Up	0.0029	26.843
Cellular Component	GO:0031981	10	nuclear lumen	0.427682	Unigene20065_All	244 708 minus strand AGAP012204-PA [Anopheles gambiae str. PEST] >gi|55234455|gb|EAA00120.2| AGAP012204-PA [Anopheles gambiae str. PEST]	1.222	Up	0.00266	17.428
Cellular Component	GO:0005576	2	extracellular region	2.82449e-05	Unigene14133_All	37 726 cuticular protein analogous to peritrophins 3-A1 precursor [Tribolium castaneum] >gi|268309018|gb|ACY95475.1| cuticular protein analogous to peritrophins 3-A1 [Tribolium castaneum]	2.137	Up	0.0162	25.705
Cellular Component	GO:0005576	2	extracellular region	2.82449e-05	Unigene17952_All	63 620 minus strand GF17401 [Drosophila ananassae] >gi|190626125|gb|EDV41649.1| GF17401 [Drosophila ananassae]	3.341	Up	0.0267	20.742
Cellular Component	GO:0005576	2	extracellular region	2.82449e-05	Unigene20356_All	32 805 minus strand cuticular protein analogous to peritrophins 3-C5 isoform 1 precursor [Tribolium castaneum] >gi|119387888|gb|ABL73929.1| obstractor C1 [Tribolium castaneum]	1.945	Up	0.0291	28.486
Cellular Component	GO:0005576	2	extracellular region	2.82449e-05	Unigene16_All	118 741 Ovotransferrin [Harpegnathos saltator]	1.314	Up	0.0158	23.226
Cellular Component	GO:0005576	2	extracellular region	2.82449e-05	Unigene3696_All	108 797 minus strand cuticular protein analogous to peritrophins 3-B precursor [Acyrthosiphon pisum]	1.551	Up	0.0287	26.381
Cellular Component	GO:0005576	2	extracellular region	2.82449e-05	Unigene28901_All	2 229 minus strand albumin [Sus scrofa]	4.611	Up	0.0354	8.5354
Cellular Component	GO:0005576	2	extracellular region	2.82449e-05	Unigene4928_All	133 339 minus strand cuticular protein analogous to peritrophins 3-A2 precursor [Tribolium castaneum] >gi|268309020|gb|ACY95476.1| cuticular protein analogous to peritrophins 3-A2 [Tribolium castaneum]	2.334	Up	0.0271	7.4783
Cellular Component	GO:0005576	2	extracellular region	2.82449e-05	Unigene20314_All	82 735 minus strand cuticular protein analogous to peritrophins 3-D1 [Danaus plexippus]	1.222	Up	0.00866	23.908
Cellular Component	GO:0005576	2	extracellular region	2.82449e-05	Unigene32074_All	3 674 minus strand albumin [Sus scrofa domesticus]	3.403	Up	0.00578	25.238
Cellular Component	GO:0005576	2	extracellular region	2.82449e-05	Unigene18191_All	60 1661 minus strand GI13501 [Drosophila mojavensis] >gi|193920062|gb|EDW18929.1| GI13501 [Drosophila mojavensis]	1.482	Up	0.0388	60.896
Cellular Component	GO:0005886	5	plasma membrane	0.427682	Unigene7780_All	8 961 minus strand Sodium/potassium-transporting ATPase subunit beta-2 [Camponotus floridanus]	1.365	Up	0.00739	36.841
Cellular Component	GO:0005886	5	plasma membrane	0.427682	Unigene16080_All	204 1130 GH10786 [Drosophila grimshawi] >gi|193904032|gb|EDW02899.1| GH10786 [Drosophila grimshawi]	1.266	Up	0.00398	35.938
Cellular Component	GO:0005773	8	vacuole	0.168817	Unigene6441_All	223 2769 vacuolar proton atpases [Aedes aegypti] >gi|108869446|gb|EAT33671.1| vacuolar proton atpases [Aedes aegypti]	1.302	Up	0.00277	95.927
Cellular Component	GO:0005773	8	vacuole	0.168817	Unigene16122_All	229 2535 minus strand PREDICTED: similar to saposin isoform 1 [Tribolium castaneum]	1.255	Up	0.0236	86.508
Cellular Component	GO:0005615	4	extracellular space	0.168817	Unigene32074_All	3 674 minus strand albumin [Sus scrofa domesticus]	3.403	Up	0.00578	25.238
Cellular Component	GO:0005615	4	extracellular space	0.168817	Unigene28901_All	2 229 minus strand albumin [Sus scrofa]	4.611	Up	0.0354	8.5354
Cellular Component	GO:0071944	4	cell periphery	0.495127	Unigene7780_All	8 961 minus strand Sodium/potassium-transporting ATPase subunit beta-2 [Camponotus floridanus]	1.365	Up	0.00739	36.841
Cellular Component	GO:0071944	4	cell periphery	0.495127	Unigene16080_All	204 1130 GH10786 [Drosophila grimshawi] >gi|193904032|gb|EDW02899.1| GH10786 [Drosophila grimshawi]	1.266	Up	0.00398	35.938
Cellular Component	GO:0098533	7	ATPase dependent transmembrane transport complex	0.168817	Unigene7780_All	8 961 minus strand Sodium/potassium-transporting ATPase subunit beta-2 [Camponotus floridanus]	1.365	Up	0.00739	36.841
Cellular Component	GO:0098533	7	ATPase dependent transmembrane transport complex	0.168817	Unigene16080_All	204 1130 GH10786 [Drosophila grimshawi] >gi|193904032|gb|EDW02899.1| GH10786 [Drosophila grimshawi]	1.266	Up	0.00398	35.938
Cellular Component	GO:0031974	2	membrane-enclosed lumen	0.58209	CL3173.Contig1_All	"123 833 minus strand pre-mrna cleavage factor im, 25kD subunit [Aedes aegypti] >gi|157118316|ref|XP_001653167.1| pre-mrna cleavage factor im, 25kD subunit [Aedes aegypti] >gi|108880136|gb|EAT44361.1| pre-mrna cleavage factor im, 25kD subunit [Aedes aegypti] >gi|108883290|gb|EAT47515.1| pre-mrna cleavage factor im, 25kD subunit [Aedes aegypti]"	1.267	Up	0.0029	26.843
Cellular Component	GO:0031974	2	membrane-enclosed lumen	0.58209	Unigene20065_All	244 708 minus strand AGAP012204-PA [Anopheles gambiae str. PEST] >gi|55234455|gb|EAA00120.2| AGAP012204-PA [Anopheles gambiae str. PEST]	1.222	Up	0.00266	17.428
Cellular Component	GO:0070013	7	intracellular organelle lumen	0.58209	CL3173.Contig1_All	"123 833 minus strand pre-mrna cleavage factor im, 25kD subunit [Aedes aegypti] >gi|157118316|ref|XP_001653167.1| pre-mrna cleavage factor im, 25kD subunit [Aedes aegypti] >gi|108880136|gb|EAT44361.1| pre-mrna cleavage factor im, 25kD subunit [Aedes aegypti] >gi|108883290|gb|EAT47515.1| pre-mrna cleavage factor im, 25kD subunit [Aedes aegypti]"	1.267	Up	0.0029	26.843
Cellular Component	GO:0070013	7	intracellular organelle lumen	0.58209	Unigene20065_All	244 708 minus strand AGAP012204-PA [Anopheles gambiae str. PEST] >gi|55234455|gb|EAA00120.2| AGAP012204-PA [Anopheles gambiae str. PEST]	1.222	Up	0.00266	17.428
Cellular Component	GO:1990351	3	transporter complex	0.218693	Unigene7780_All	8 961 minus strand Sodium/potassium-transporting ATPase subunit beta-2 [Camponotus floridanus]	1.365	Up	0.00739	36.841
Cellular Component	GO:1990351	3	transporter complex	0.218693	Unigene16080_All	204 1130 GH10786 [Drosophila grimshawi] >gi|193904032|gb|EDW02899.1| GH10786 [Drosophila grimshawi]	1.266	Up	0.00398	35.938
Cellular Component	GO:1902495	6	transmembrane transporter complex	0.218693	Unigene7780_All	8 961 minus strand Sodium/potassium-transporting ATPase subunit beta-2 [Camponotus floridanus]	1.365	Up	0.00739	36.841
Cellular Component	GO:1902495	6	transmembrane transporter complex	0.218693	Unigene16080_All	204 1130 GH10786 [Drosophila grimshawi] >gi|193904032|gb|EDW02899.1| GH10786 [Drosophila grimshawi]	1.266	Up	0.00398	35.938
Cellular Component	GO:0044459	6	plasma membrane part	0.371456	Unigene7780_All	8 961 minus strand Sodium/potassium-transporting ATPase subunit beta-2 [Camponotus floridanus]	1.365	Up	0.00739	36.841
Cellular Component	GO:0044459	6	plasma membrane part	0.371456	Unigene16080_All	204 1130 GH10786 [Drosophila grimshawi] >gi|193904032|gb|EDW02899.1| GH10786 [Drosophila grimshawi]	1.266	Up	0.00398	35.938
Cellular Component	GO:1904949	4	ATPase complex	0.168817	Unigene7780_All	8 961 minus strand Sodium/potassium-transporting ATPase subunit beta-2 [Camponotus floridanus]	1.365	Up	0.00739	36.841
Cellular Component	GO:1904949	4	ATPase complex	0.168817	Unigene16080_All	204 1130 GH10786 [Drosophila grimshawi] >gi|193904032|gb|EDW02899.1| GH10786 [Drosophila grimshawi]	1.266	Up	0.00398	35.938
Cellular Component	GO:0005890	9	sodium:potassium-exchanging ATPase complex	0.168817	Unigene7780_All	8 961 minus strand Sodium/potassium-transporting ATPase subunit beta-2 [Camponotus floridanus]	1.365	Up	0.00739	36.841
Cellular Component	GO:0005890	9	sodium:potassium-exchanging ATPase complex	0.168817	Unigene16080_All	204 1130 GH10786 [Drosophila grimshawi] >gi|193904032|gb|EDW02899.1| GH10786 [Drosophila grimshawi]	1.266	Up	0.00398	35.938
Cellular Component	GO:0044428	9	nuclear part	0.675786	CL3173.Contig1_All	"123 833 minus strand pre-mrna cleavage factor im, 25kD subunit [Aedes aegypti] >gi|157118316|ref|XP_001653167.1| pre-mrna cleavage factor im, 25kD subunit [Aedes aegypti] >gi|108880136|gb|EAT44361.1| pre-mrna cleavage factor im, 25kD subunit [Aedes aegypti] >gi|108883290|gb|EAT47515.1| pre-mrna cleavage factor im, 25kD subunit [Aedes aegypti]"	1.267	Up	0.0029	26.843
Cellular Component	GO:0044428	9	nuclear part	0.675786	Unigene20065_All	244 708 minus strand AGAP012204-PA [Anopheles gambiae str. PEST] >gi|55234455|gb|EAA00120.2| AGAP012204-PA [Anopheles gambiae str. PEST]	1.222	Up	0.00266	17.428
Molecular Function	GO:0008233	4	peptidase activity	7.04284e-09	Unigene5688_All	195 1283 Carboxypeptidase B [Camponotus floridanus]	2.957	Up	7.5e-05	41.14
Molecular Function	GO:0008233	4	peptidase activity	7.04284e-09	Unigene16075_All	173 1174 minus strand cathepsin L-like cysteine protease 2 [Plautia stali]	1.206	Up	0.0277	37.586
Molecular Function	GO:0008233	4	peptidase activity	7.04284e-09	Unigene1559_All	93 848 minus strand salivary trypsin [Triatoma matogrossensis]	1.469	Up	0.00676	28.054
Molecular Function	GO:0008233	4	peptidase activity	7.04284e-09	Unigene10388_All	2 361 minus strand PREDICTED: venom serine protease 34 [Apis mellifera]	1.390	Up	0.0454	13.046
Molecular Function	GO:0008233	4	peptidase activity	7.04284e-09	Unigene18009_All	1 708 minus strand trypsin precursor LlGtP1 [Lygus lineolaris]	1.605	Up	0.0142	26.422
Molecular Function	GO:0008233	4	peptidase activity	7.04284e-09	CL1335.Contig2_All	123 1127 GH22826 [Drosophila grimshawi] >gi|193899288|gb|EDV98154.1| GH22826 [Drosophila grimshawi]	1.671	Up	0.0298	37.454
Molecular Function	GO:0008233	4	peptidase activity	7.04284e-09	Unigene13874_All	1 726 trypsin precursor LlSgP4 [Lygus lineolaris]	1.530	Up	0.00491	26.801
Molecular Function	GO:0008233	4	peptidase activity	7.04284e-09	Unigene1577_All	53 862 minus strand trypsin precursor LlSgP3 [Lygus lineolaris]	1.651	Up	0.0492	29.989
Molecular Function	GO:0008233	4	peptidase activity	7.04284e-09	CL1236.Contig2_All	26 334 salivary trypsin [Triatoma infestans]	1.451	Up	0.0132	11.226
Molecular Function	GO:0008233	4	peptidase activity	7.04284e-09	Unigene6391_All	80 2734 minus strand PREDICTED: endoplasmic reticulum aminopeptidase 2-like [Acyrthosiphon pisum]	1.276	Up	0.0109	100.35
Molecular Function	GO:0008233	4	peptidase activity	7.04284e-09	Unigene25864_All	3 767 minus strand Aminopeptidase N [Harpegnathos saltator]	1.246	Up	0.0448	29.413
Molecular Function	GO:0008233	4	peptidase activity	7.04284e-09	CL3836.Contig1_All	111 1340 minus strand PREDICTED: venom serine carboxypeptidase-like [Bombus terrestris]	4.260	Up	0.000847	46.988
Molecular Function	GO:0008233	4	peptidase activity	7.04284e-09	CL2959.Contig1_All	444 1703 minus strand Sentrin-specific protease 1 [Acromyrmex echinatior]	1.213	Up	0.0295	48.526
Molecular Function	GO:0008233	4	peptidase activity	7.04284e-09	CL515.Contig1_All	5 706 minus strand trypsin precursor LlSgP3 [Lygus lineolaris]	1.681	Up	0.0214	25.644
Molecular Function	GO:0008233	4	peptidase activity	7.04284e-09	CL1296.Contig3_All	111 866 trypsin precursor LlSgP4 [Lygus lineolaris]	1.754	Up	0.0419	27.783
Molecular Function	GO:0008233	4	peptidase activity	7.04284e-09	Unigene9867_All	110 1279 minus strand aspartate protease cathepsin D [Triatoma infestans]	1.498	Up	0.00556	42.518
Molecular Function	GO:0008233	4	peptidase activity	7.04284e-09	Unigene18257_All	90 848 minus strand trypsin-like protease [Ranatra unicolor]	1.656	Up	0.0351	28.034
Molecular Function	GO:0008233	4	peptidase activity	7.04284e-09	CL5255.Contig1_All	2 733 cathepsin L-like cysteine protease 1 [Plautia stali]	5.476	Up	0.000372	27.166
Molecular Function	GO:0008233	4	peptidase activity	7.04284e-09	Unigene2103_All	161 1036 minus strand secreted salivary trypsin [Triatoma matogrossensis]	1.650	Up	0.0126	32.091
Molecular Function	GO:0008233	4	peptidase activity	7.04284e-09	Unigene18721_All	2 373 minus strand trypsin precursor LlSgP4 [Lygus lineolaris]	1.758	Up	0.0116	13.846
Molecular Function	GO:0008233	4	peptidase activity	7.04284e-09	Unigene9788_All	127 537 Plasma kallikrein [Camponotus floridanus]	1.402	Up	0.0294	15.461
Molecular Function	GO:0008233	4	peptidase activity	7.04284e-09	Unigene14000_All	69 1217 minus strand molting fluid carboxypeptidase A precursor [Bombyx mori] >gi|54114893|dbj|BAD60916.1| molting fluid carboxypeptidase A [Bombyx mori]	1.329	Up	0.0358	43.859
Molecular Function	GO:0008233	4	peptidase activity	7.04284e-09	Unigene3411_All	2 721 minus strand trypsin precursor LlSgP4 [Lygus lineolaris]	1.703	Up	0.00225	26.811
Molecular Function	GO:0008233	4	peptidase activity	7.04284e-09	CL3794.Contig2_All	76 906 trypsin precursor LlGtP1 [Lygus lineolaris]	1.572	Up	0.023	30.773
Molecular Function	GO:0008233	4	peptidase activity	7.04284e-09	CL2683.Contig1_All	3 557 minus strand serine protease [Laccotrephes japonensis]	1.575	Up	0.00338	20.491
Molecular Function	GO:0008233	4	peptidase activity	7.04284e-09	Unigene14038_All	126 1337 tick legumain [Haemaphysalis longicornis]	1.483	Up	0.0138	45.682
Molecular Function	GO:0008233	4	peptidase activity	7.04284e-09	CL1296.Contig1_All	69 848 trypsin precursor LlSgP4 [Lygus lineolaris]	1.682	Up	0.0299	28.698
Molecular Function	GO:0008233	4	peptidase activity	7.04284e-09	CL184.Contig3_All	103 984 minus strand secreted salivary trypsin [Triatoma matogrossensis]	2.021	Up	0.0175	32.214
Molecular Function	GO:0008233	4	peptidase activity	7.04284e-09	CL3835.Contig1_All	87 2759 minus strand PREDICTED: similar to protease m1 zinc metalloprotease [Tribolium castaneum]	2.202	Up	0.0312	103.68
Molecular Function	GO:0008233	4	peptidase activity	7.04284e-09	Unigene13889_All	1 714 minus strand trypsin-like protease [Ranatra unicolor]	1.330	Up	0.0424	26.457
Molecular Function	GO:0008233	4	peptidase activity	7.04284e-09	Unigene18171_All	96 1094 minus strand cathepsin b [Aedes aegypti] >gi|54289254|gb|AAV31917.1| lysosomal cathepsin B [Aedes aegypti] >gi|108874249|gb|EAT38474.1| cathepsin b [Aedes aegypti]	1.594	Up	0.0212	36.55
Molecular Function	GO:0008233	4	peptidase activity	7.04284e-09	Unigene9896_All	240 1625 PREDICTED: similar to thymus-specific serine protease [Tribolium castaneum]	1.296	Up	0.0293	52.646
Molecular Function	GO:0008233	4	peptidase activity	7.04284e-09	Unigene10407_All	202 387 minus strand GH14281 [Drosophila grimshawi] >gi|193892526|gb|EDV91392.1| GH14281 [Drosophila grimshawi]	1.422	Up	0.0428	6.7216
Molecular Function	GO:0008233	4	peptidase activity	7.04284e-09	Unigene1576_All	70 774 novel protein [Danio rerio]	1.370	Up	0.0107	25.922
Molecular Function	GO:0008233	4	peptidase activity	7.04284e-09	Unigene9720_All	1 351 trypsin precursor LlGtP1 [Lygus lineolaris]	1.314	Up	0.00295	12.677
Molecular Function	GO:0008233	4	peptidase activity	7.04284e-09	CL3674.Contig2_All	79 1200 minus strand PREDICTED: serine proteinase stubble [Apis mellifera]	1.249	Up	0.0176	41.28
Molecular Function	GO:0008233	4	peptidase activity	7.04284e-09	CL1553.Contig1_All	3 725 trypsin precursor LlSgP4 [Lygus lineolaris]	1.437	Up	0.0179	26.551
Molecular Function	GO:0008233	4	peptidase activity	7.04284e-09	CL2568.Contig2_All	95 1120 minus strand serine proteinase [Rhodnius prolixus]	1.684	Up	0.0286	36.881
Molecular Function	GO:0008233	4	peptidase activity	7.04284e-09	CL3836.Contig3_All	105 1325 PREDICTED: venom serine carboxypeptidase-like [Bombus terrestris]	5.307	Up	4.49e-05	46.684
Molecular Function	GO:0008233	4	peptidase activity	7.04284e-09	Unigene2476_All	9 2690 minus strand Neurotrypsin [Camponotus floridanus]	1.279	Up	0.00891	98.5
Molecular Function	GO:0008483	5	transaminase activity	0.479083	Unigene6523_All	2 715 minus strand alanine-glyoxylate aminotransferase [Aedes aegypti] >gi|108884056|gb|EAT48281.1| alanine-glyoxylate aminotransferase [Aedes aegypti]	1.520	Up	0.00318	25.851
Molecular Function	GO:0008483	5	transaminase activity	0.479083	CL750.Contig1_All	387 1769 minus strand PREDICTED: similar to 4-aminobutyrate aminotransferase [Tribolium castaneum]	1.518	Up	0.000565	51.43
Molecular Function	GO:0016769	4	transferase activity, transferring nitrogenous groups	0.479083	Unigene6523_All	2 715 minus strand alanine-glyoxylate aminotransferase [Aedes aegypti] >gi|108884056|gb|EAT48281.1| alanine-glyoxylate aminotransferase [Aedes aegypti]	1.520	Up	0.00318	25.851
Molecular Function	GO:0016769	4	transferase activity, transferring nitrogenous groups	0.479083	CL750.Contig1_All	387 1769 minus strand PREDICTED: similar to 4-aminobutyrate aminotransferase [Tribolium castaneum]	1.518	Up	0.000565	51.43
Molecular Function	GO:0005506	7	iron ion binding	0.000216616	Unigene14700_All	93 1583 minus strand cytochrome P450 CYP6AX1 protein [Nilaparvata lugens]	1.972	Up	0.0102	57.202
Molecular Function	GO:0005506	7	iron ion binding	0.000216616	CL3790.Contig1_All	2 1237 minus strand cytochrome P450 [Aedes aegypti] >gi|108874803|gb|EAT39028.1| cytochrome P450 [Aedes aegypti]	1.263	Up	0.032	48.455
Molecular Function	GO:0005506	7	iron ion binding	0.000216616	CL2752.Contig2_All	63 1547 cytochrome P450 monooxygenase CYP6X1v1 [Lygus lineolaris]	2.892	Up	0.00105	57.102
Molecular Function	GO:0005506	7	iron ion binding	0.000216616	CL3702.Contig1_All	256 1623 minus strand PREDICTED: similar to cytochrome P450 [Tribolium castaneum]	1.682	Up	3.1e-05	52.65
Molecular Function	GO:0005506	7	iron ion binding	0.000216616	Unigene12673_All	106 1587 minus strand cytochrome P450 monooxygenase CYP6X1v1 [Lygus lineolaris]	1.513	Up	0.00988	57.101
Molecular Function	GO:0005506	7	iron ion binding	0.000216616	Unigene20257_All	241 1761 minus strand cytochrome P450 CYP6AX1 protein [Nilaparvata lugens]	1.462	Up	9.49e-05	58.215
Molecular Function	GO:0005506	7	iron ion binding	0.000216616	CL1079.Contig2_All	235 1698 cytochrome P450 [Hodotermopsis sjoestedti]	1.360	Up	0.00777	55.722
Molecular Function	GO:0005506	7	iron ion binding	0.000216616	CL4370.Contig2_All	40 1515 minus strand cytochrome P450 monooxygenase CYP6X1v1 [Lygus lineolaris]	1.896	Up	0.0375	56.987
Molecular Function	GO:0005506	7	iron ion binding	0.000216616	CL1830.Contig1_All	165 1670 cytochrome P450 monooxygenase CYP6X1v1 [Lygus lineolaris]	1.304	Up	0.0186	58.03
Molecular Function	GO:0005506	7	iron ion binding	0.000216616	Unigene1596_All	185 700 ferritin [Triatoma infestans]	2.387	Up	0.00304	19.469
Molecular Function	GO:0005506	7	iron ion binding	0.000216616	CL1001.Contig1_All	127 1665 cytochrome P450 4A6 [Culex quinquefasciatus] >gi|167881331|gb|EDS44714.1| cytochrome P450 4A6 [Culex quinquefasciatus]	1.324	Up	0.00721	59.313
Molecular Function	GO:0005506	7	iron ion binding	0.000216616	Unigene8711_All	78 1565 minus strand cytochrome P450 [Nilaparvata lugens]	3.474	Up	0.0104	56.837
Molecular Function	GO:0005506	7	iron ion binding	0.000216616	Unigene3595_All	57 1514 minus strand PREDICTED: probable cytochrome P450 305a1-like [Bombus terrestris]	2.505	Up	0.0022	55.754
Molecular Function	GO:0008235	7	metalloexopeptidase activity	0.712606	Unigene5688_All	195 1283 Carboxypeptidase B [Camponotus floridanus]	2.957	Up	7.5e-05	41.14
Molecular Function	GO:0008235	7	metalloexopeptidase activity	0.712606	Unigene14000_All	69 1217 minus strand molting fluid carboxypeptidase A precursor [Bombyx mori] >gi|54114893|dbj|BAD60916.1| molting fluid carboxypeptidase A [Bombyx mori]	1.329	Up	0.0358	43.859
Molecular Function	GO:0016705	4	oxidoreductase activity, acting on paired donors, with incorporation or reduction of molecular oxygen	0.00112806	Unigene14700_All	93 1583 minus strand cytochrome P450 CYP6AX1 protein [Nilaparvata lugens]	1.972	Up	0.0102	57.202
Molecular Function	GO:0016705	4	oxidoreductase activity, acting on paired donors, with incorporation or reduction of molecular oxygen	0.00112806	CL3790.Contig1_All	2 1237 minus strand cytochrome P450 [Aedes aegypti] >gi|108874803|gb|EAT39028.1| cytochrome P450 [Aedes aegypti]	1.263	Up	0.032	48.455
Molecular Function	GO:0016705	4	oxidoreductase activity, acting on paired donors, with incorporation or reduction of molecular oxygen	0.00112806	CL2752.Contig2_All	63 1547 cytochrome P450 monooxygenase CYP6X1v1 [Lygus lineolaris]	2.892	Up	0.00105	57.102
Molecular Function	GO:0016705	4	oxidoreductase activity, acting on paired donors, with incorporation or reduction of molecular oxygen	0.00112806	CL3702.Contig1_All	256 1623 minus strand PREDICTED: similar to cytochrome P450 [Tribolium castaneum]	1.682	Up	3.1e-05	52.65
Molecular Function	GO:0016705	4	oxidoreductase activity, acting on paired donors, with incorporation or reduction of molecular oxygen	0.00112806	Unigene12673_All	106 1587 minus strand cytochrome P450 monooxygenase CYP6X1v1 [Lygus lineolaris]	1.513	Up	0.00988	57.101
Molecular Function	GO:0016705	4	oxidoreductase activity, acting on paired donors, with incorporation or reduction of molecular oxygen	0.00112806	Unigene20257_All	241 1761 minus strand cytochrome P450 CYP6AX1 protein [Nilaparvata lugens]	1.462	Up	9.49e-05	58.215
Molecular Function	GO:0016705	4	oxidoreductase activity, acting on paired donors, with incorporation or reduction of molecular oxygen	0.00112806	CL1079.Contig2_All	235 1698 cytochrome P450 [Hodotermopsis sjoestedti]	1.360	Up	0.00777	55.722
Molecular Function	GO:0016705	4	oxidoreductase activity, acting on paired donors, with incorporation or reduction of molecular oxygen	0.00112806	CL1830.Contig1_All	165 1670 cytochrome P450 monooxygenase CYP6X1v1 [Lygus lineolaris]	1.304	Up	0.0186	58.03
Molecular Function	GO:0016705	4	oxidoreductase activity, acting on paired donors, with incorporation or reduction of molecular oxygen	0.00112806	CL4370.Contig2_All	40 1515 minus strand cytochrome P450 monooxygenase CYP6X1v1 [Lygus lineolaris]	1.896	Up	0.0375	56.987
Molecular Function	GO:0016705	4	oxidoreductase activity, acting on paired donors, with incorporation or reduction of molecular oxygen	0.00112806	CL1001.Contig1_All	127 1665 cytochrome P450 4A6 [Culex quinquefasciatus] >gi|167881331|gb|EDS44714.1| cytochrome P450 4A6 [Culex quinquefasciatus]	1.324	Up	0.00721	59.313
Molecular Function	GO:0016705	4	oxidoreductase activity, acting on paired donors, with incorporation or reduction of molecular oxygen	0.00112806	Unigene8711_All	78 1565 minus strand cytochrome P450 [Nilaparvata lugens]	3.474	Up	0.0104	56.837
Molecular Function	GO:0016705	4	oxidoreductase activity, acting on paired donors, with incorporation or reduction of molecular oxygen	0.00112806	Unigene3595_All	57 1514 minus strand PREDICTED: probable cytochrome P450 305a1-like [Bombus terrestris]	2.505	Up	0.0022	55.754
Molecular Function	GO:0016747	5	transferase activity, transferring acyl groups other than amino-acyl groups	0.590585	Unigene16828_All	12 1808 PREDICTED: similar to fatty acid synthase [Tribolium castaneum]	1.555	Up	0.0207	65.315
Molecular Function	GO:0016747	5	transferase activity, transferring acyl groups other than amino-acyl groups	0.590585	Unigene12628_All	162 1289 PREDICTED: similar to phosphatidylcholine-sterol acyltransferase (lecithin-cholesterol acyltransferase) [Tribolium castaneum]	1.325	Up	0.0165	42.257
Molecular Function	GO:0016747	5	transferase activity, transferring acyl groups other than amino-acyl groups	0.590585	Unigene3713_All	65 1021 minus strand 2-acylglycerol O-acyltransferase 1 [Harpegnathos saltator]	1.460	Up	0.0373	36.157
Molecular Function	GO:0070011	5	peptidase activity, acting on L-amino acid peptides	7.74127e-09	Unigene5688_All	195 1283 Carboxypeptidase B [Camponotus floridanus]	2.957	Up	7.5e-05	41.14
Molecular Function	GO:0070011	5	peptidase activity, acting on L-amino acid peptides	7.74127e-09	Unigene16075_All	173 1174 minus strand cathepsin L-like cysteine protease 2 [Plautia stali]	1.206	Up	0.0277	37.586
Molecular Function	GO:0070011	5	peptidase activity, acting on L-amino acid peptides	7.74127e-09	Unigene1559_All	93 848 minus strand salivary trypsin [Triatoma matogrossensis]	1.469	Up	0.00676	28.054
Molecular Function	GO:0070011	5	peptidase activity, acting on L-amino acid peptides	7.74127e-09	Unigene10388_All	2 361 minus strand PREDICTED: venom serine protease 34 [Apis mellifera]	1.390	Up	0.0454	13.046
Molecular Function	GO:0070011	5	peptidase activity, acting on L-amino acid peptides	7.74127e-09	Unigene18009_All	1 708 minus strand trypsin precursor LlGtP1 [Lygus lineolaris]	1.605	Up	0.0142	26.422
Molecular Function	GO:0070011	5	peptidase activity, acting on L-amino acid peptides	7.74127e-09	CL1335.Contig2_All	123 1127 GH22826 [Drosophila grimshawi] >gi|193899288|gb|EDV98154.1| GH22826 [Drosophila grimshawi]	1.671	Up	0.0298	37.454
Molecular Function	GO:0070011	5	peptidase activity, acting on L-amino acid peptides	7.74127e-09	Unigene13874_All	1 726 trypsin precursor LlSgP4 [Lygus lineolaris]	1.530	Up	0.00491	26.801
Molecular Function	GO:0070011	5	peptidase activity, acting on L-amino acid peptides	7.74127e-09	Unigene1577_All	53 862 minus strand trypsin precursor LlSgP3 [Lygus lineolaris]	1.651	Up	0.0492	29.989
Molecular Function	GO:0070011	5	peptidase activity, acting on L-amino acid peptides	7.74127e-09	CL1236.Contig2_All	26 334 salivary trypsin [Triatoma infestans]	1.451	Up	0.0132	11.226
Molecular Function	GO:0070011	5	peptidase activity, acting on L-amino acid peptides	7.74127e-09	Unigene6391_All	80 2734 minus strand PREDICTED: endoplasmic reticulum aminopeptidase 2-like [Acyrthosiphon pisum]	1.276	Up	0.0109	100.35
Molecular Function	GO:0070011	5	peptidase activity, acting on L-amino acid peptides	7.74127e-09	Unigene25864_All	3 767 minus strand Aminopeptidase N [Harpegnathos saltator]	1.246	Up	0.0448	29.413
Molecular Function	GO:0070011	5	peptidase activity, acting on L-amino acid peptides	7.74127e-09	CL3836.Contig1_All	111 1340 minus strand PREDICTED: venom serine carboxypeptidase-like [Bombus terrestris]	4.260	Up	0.000847	46.988
Molecular Function	GO:0070011	5	peptidase activity, acting on L-amino acid peptides	7.74127e-09	CL2959.Contig1_All	444 1703 minus strand Sentrin-specific protease 1 [Acromyrmex echinatior]	1.213	Up	0.0295	48.526
Molecular Function	GO:0070011	5	peptidase activity, acting on L-amino acid peptides	7.74127e-09	CL515.Contig1_All	5 706 minus strand trypsin precursor LlSgP3 [Lygus lineolaris]	1.681	Up	0.0214	25.644
Molecular Function	GO:0070011	5	peptidase activity, acting on L-amino acid peptides	7.74127e-09	CL1296.Contig3_All	111 866 trypsin precursor LlSgP4 [Lygus lineolaris]	1.754	Up	0.0419	27.783
Molecular Function	GO:0070011	5	peptidase activity, acting on L-amino acid peptides	7.74127e-09	Unigene9867_All	110 1279 minus strand aspartate protease cathepsin D [Triatoma infestans]	1.498	Up	0.00556	42.518
Molecular Function	GO:0070011	5	peptidase activity, acting on L-amino acid peptides	7.74127e-09	Unigene18257_All	90 848 minus strand trypsin-like protease [Ranatra unicolor]	1.656	Up	0.0351	28.034
Molecular Function	GO:0070011	5	peptidase activity, acting on L-amino acid peptides	7.74127e-09	CL5255.Contig1_All	2 733 cathepsin L-like cysteine protease 1 [Plautia stali]	5.476	Up	0.000372	27.166
Molecular Function	GO:0070011	5	peptidase activity, acting on L-amino acid peptides	7.74127e-09	Unigene2103_All	161 1036 minus strand secreted salivary trypsin [Triatoma matogrossensis]	1.650	Up	0.0126	32.091
Molecular Function	GO:0070011	5	peptidase activity, acting on L-amino acid peptides	7.74127e-09	Unigene18721_All	2 373 minus strand trypsin precursor LlSgP4 [Lygus lineolaris]	1.758	Up	0.0116	13.846
Molecular Function	GO:0070011	5	peptidase activity, acting on L-amino acid peptides	7.74127e-09	Unigene9788_All	127 537 Plasma kallikrein [Camponotus floridanus]	1.402	Up	0.0294	15.461
Molecular Function	GO:0070011	5	peptidase activity, acting on L-amino acid peptides	7.74127e-09	Unigene14000_All	69 1217 minus strand molting fluid carboxypeptidase A precursor [Bombyx mori] >gi|54114893|dbj|BAD60916.1| molting fluid carboxypeptidase A [Bombyx mori]	1.329	Up	0.0358	43.859
Molecular Function	GO:0070011	5	peptidase activity, acting on L-amino acid peptides	7.74127e-09	Unigene3411_All	2 721 minus strand trypsin precursor LlSgP4 [Lygus lineolaris]	1.703	Up	0.00225	26.811
Molecular Function	GO:0070011	5	peptidase activity, acting on L-amino acid peptides	7.74127e-09	CL3794.Contig2_All	76 906 trypsin precursor LlGtP1 [Lygus lineolaris]	1.572	Up	0.023	30.773
Molecular Function	GO:0070011	5	peptidase activity, acting on L-amino acid peptides	7.74127e-09	CL1296.Contig1_All	69 848 trypsin precursor LlSgP4 [Lygus lineolaris]	1.682	Up	0.0299	28.698
Molecular Function	GO:0070011	5	peptidase activity, acting on L-amino acid peptides	7.74127e-09	CL2683.Contig1_All	3 557 minus strand serine protease [Laccotrephes japonensis]	1.575	Up	0.00338	20.491
Molecular Function	GO:0070011	5	peptidase activity, acting on L-amino acid peptides	7.74127e-09	CL184.Contig3_All	103 984 minus strand secreted salivary trypsin [Triatoma matogrossensis]	2.021	Up	0.0175	32.214
Molecular Function	GO:0070011	5	peptidase activity, acting on L-amino acid peptides	7.74127e-09	CL3835.Contig1_All	87 2759 minus strand PREDICTED: similar to protease m1 zinc metalloprotease [Tribolium castaneum]	2.202	Up	0.0312	103.68
Molecular Function	GO:0070011	5	peptidase activity, acting on L-amino acid peptides	7.74127e-09	Unigene13889_All	1 714 minus strand trypsin-like protease [Ranatra unicolor]	1.330	Up	0.0424	26.457
Molecular Function	GO:0070011	5	peptidase activity, acting on L-amino acid peptides	7.74127e-09	Unigene18171_All	96 1094 minus strand cathepsin b [Aedes aegypti] >gi|54289254|gb|AAV31917.1| lysosomal cathepsin B [Aedes aegypti] >gi|108874249|gb|EAT38474.1| cathepsin b [Aedes aegypti]	1.594	Up	0.0212	36.55
Molecular Function	GO:0070011	5	peptidase activity, acting on L-amino acid peptides	7.74127e-09	Unigene9896_All	240 1625 PREDICTED: similar to thymus-specific serine protease [Tribolium castaneum]	1.296	Up	0.0293	52.646
Molecular Function	GO:0070011	5	peptidase activity, acting on L-amino acid peptides	7.74127e-09	Unigene10407_All	202 387 minus strand GH14281 [Drosophila grimshawi] >gi|193892526|gb|EDV91392.1| GH14281 [Drosophila grimshawi]	1.422	Up	0.0428	6.7216
Molecular Function	GO:0070011	5	peptidase activity, acting on L-amino acid peptides	7.74127e-09	Unigene1576_All	70 774 novel protein [Danio rerio]	1.370	Up	0.0107	25.922
Molecular Function	GO:0070011	5	peptidase activity, acting on L-amino acid peptides	7.74127e-09	Unigene9720_All	1 351 trypsin precursor LlGtP1 [Lygus lineolaris]	1.314	Up	0.00295	12.677
Molecular Function	GO:0070011	5	peptidase activity, acting on L-amino acid peptides	7.74127e-09	CL3674.Contig2_All	79 1200 minus strand PREDICTED: serine proteinase stubble [Apis mellifera]	1.249	Up	0.0176	41.28
Molecular Function	GO:0070011	5	peptidase activity, acting on L-amino acid peptides	7.74127e-09	CL1553.Contig1_All	3 725 trypsin precursor LlSgP4 [Lygus lineolaris]	1.437	Up	0.0179	26.551
Molecular Function	GO:0070011	5	peptidase activity, acting on L-amino acid peptides	7.74127e-09	CL2568.Contig2_All	95 1120 minus strand serine proteinase [Rhodnius prolixus]	1.684	Up	0.0286	36.881
Molecular Function	GO:0070011	5	peptidase activity, acting on L-amino acid peptides	7.74127e-09	CL3836.Contig3_All	105 1325 PREDICTED: venom serine carboxypeptidase-like [Bombus terrestris]	5.307	Up	4.49e-05	46.684
Molecular Function	GO:0070011	5	peptidase activity, acting on L-amino acid peptides	7.74127e-09	Unigene2476_All	9 2690 minus strand Neurotrypsin [Camponotus floridanus]	1.279	Up	0.00891	98.5
Molecular Function	GO:0008081	6	phosphoric diester hydrolase activity	0.479083	CL1177.Contig2_All	60 578 minus strand PREDICTED: similar to Phosphatidylinositol-specific phospholipase C X domain-containing protein 2 (PI-PLC X domain-containing protein 2) [Ciona intestinalis]	1.669	Up	0.015	19.72
Molecular Function	GO:0008081	6	phosphoric diester hydrolase activity	0.479083	Unigene8718_All	"118 1773 PREDICTED: cAMP-specific 3',5'-cyclic phosphodiesterase [Apis mellifera]"	1.426	Up	0.0121	62.35
Molecular Function	GO:0050660	6	flavin adenine dinucleotide binding	0.40646	Unigene2139_All	163 2151 minus strand PREDICTED: similar to acyl-CoA oxidase [Tribolium castaneum]	1.235	Up	0.0186	75.236
Molecular Function	GO:0050660	6	flavin adenine dinucleotide binding	0.40646	Unigene2236_All	208 1902 PREDICTED: glucose dehydrogenase [acceptor]-like isoform 1 [Acyrthosiphon pisum] >gi|328705616|ref|XP_003242858.1| PREDICTED: glucose dehydrogenase [acceptor]-like isoform 2 [Acyrthosiphon pisum]	1.386	Up	0.0329	62.685
Molecular Function	GO:0050660	6	flavin adenine dinucleotide binding	0.40646	Unigene1599_All	"48 1271 PREDICTED: isovaleryl-CoA dehydrogenase, mitochondrial-like [Bombus impatiens]"	1.336	Up	0.0295	44.821
Molecular Function	GO:0050660	6	flavin adenine dinucleotide binding	0.40646	CL3352.Contig3_All	283 2016 minus strand Glucose dehydrogenase [acceptor] [Harpegnathos saltator]	2.064	Up	0.02	63.667
Molecular Function	GO:0016903	4	oxidoreductase activity, acting on the aldehyde or oxo group of donors	0.694971	Unigene17115_All	204 1901 minus strand PREDICTED: similar to pyrroline-5-carboxylate dehydrogenase [Tribolium castaneum]	1.216	Up	0.00739	62.781
Molecular Function	GO:0016903	4	oxidoreductase activity, acting on the aldehyde or oxo group of donors	0.694971	Unigene1515_All	49 1545 minus strand GH13324 [Drosophila grimshawi] >gi|193900077|gb|EDV98943.1| GH13324 [Drosophila grimshawi]	1.720	Up	0.0044	55.04
Molecular Function	GO:0008236	6	serine-type peptidase activity	3.28945e-11	Unigene1559_All	93 848 minus strand salivary trypsin [Triatoma matogrossensis]	1.469	Up	0.00676	28.054
Molecular Function	GO:0008236	6	serine-type peptidase activity	3.28945e-11	Unigene10388_All	2 361 minus strand PREDICTED: venom serine protease 34 [Apis mellifera]	1.390	Up	0.0454	13.046
Molecular Function	GO:0008236	6	serine-type peptidase activity	3.28945e-11	Unigene18009_All	1 708 minus strand trypsin precursor LlGtP1 [Lygus lineolaris]	1.605	Up	0.0142	26.422
Molecular Function	GO:0008236	6	serine-type peptidase activity	3.28945e-11	Unigene3411_All	2 721 minus strand trypsin precursor LlSgP4 [Lygus lineolaris]	1.703	Up	0.00225	26.811
Molecular Function	GO:0008236	6	serine-type peptidase activity	3.28945e-11	CL3794.Contig2_All	76 906 trypsin precursor LlGtP1 [Lygus lineolaris]	1.572	Up	0.023	30.773
Molecular Function	GO:0008236	6	serine-type peptidase activity	3.28945e-11	Unigene13874_All	1 726 trypsin precursor LlSgP4 [Lygus lineolaris]	1.530	Up	0.00491	26.801
Molecular Function	GO:0008236	6	serine-type peptidase activity	3.28945e-11	Unigene1577_All	53 862 minus strand trypsin precursor LlSgP3 [Lygus lineolaris]	1.651	Up	0.0492	29.989
Molecular Function	GO:0008236	6	serine-type peptidase activity	3.28945e-11	CL1236.Contig2_All	26 334 salivary trypsin [Triatoma infestans]	1.451	Up	0.0132	11.226
Molecular Function	GO:0008236	6	serine-type peptidase activity	3.28945e-11	CL2683.Contig1_All	3 557 minus strand serine protease [Laccotrephes japonensis]	1.575	Up	0.00338	20.491
Molecular Function	GO:0008236	6	serine-type peptidase activity	3.28945e-11	CL1296.Contig1_All	69 848 trypsin precursor LlSgP4 [Lygus lineolaris]	1.682	Up	0.0299	28.698
Molecular Function	GO:0008236	6	serine-type peptidase activity	3.28945e-11	CL3836.Contig1_All	111 1340 minus strand PREDICTED: venom serine carboxypeptidase-like [Bombus terrestris]	4.260	Up	0.000847	46.988
Molecular Function	GO:0008236	6	serine-type peptidase activity	3.28945e-11	CL184.Contig3_All	103 984 minus strand secreted salivary trypsin [Triatoma matogrossensis]	2.021	Up	0.0175	32.214
Molecular Function	GO:0008236	6	serine-type peptidase activity	3.28945e-11	Unigene13889_All	1 714 minus strand trypsin-like protease [Ranatra unicolor]	1.330	Up	0.0424	26.457
Molecular Function	GO:0008236	6	serine-type peptidase activity	3.28945e-11	CL515.Contig1_All	5 706 minus strand trypsin precursor LlSgP3 [Lygus lineolaris]	1.681	Up	0.0214	25.644
Molecular Function	GO:0008236	6	serine-type peptidase activity	3.28945e-11	CL1296.Contig3_All	111 866 trypsin precursor LlSgP4 [Lygus lineolaris]	1.754	Up	0.0419	27.783
Molecular Function	GO:0008236	6	serine-type peptidase activity	3.28945e-11	Unigene18257_All	90 848 minus strand trypsin-like protease [Ranatra unicolor]	1.656	Up	0.0351	28.034
Molecular Function	GO:0008236	6	serine-type peptidase activity	3.28945e-11	Unigene9896_All	240 1625 PREDICTED: similar to thymus-specific serine protease [Tribolium castaneum]	1.296	Up	0.0293	52.646
Molecular Function	GO:0008236	6	serine-type peptidase activity	3.28945e-11	Unigene10407_All	202 387 minus strand GH14281 [Drosophila grimshawi] >gi|193892526|gb|EDV91392.1| GH14281 [Drosophila grimshawi]	1.422	Up	0.0428	6.7216
Molecular Function	GO:0008236	6	serine-type peptidase activity	3.28945e-11	Unigene1576_All	70 774 novel protein [Danio rerio]	1.370	Up	0.0107	25.922
Molecular Function	GO:0008236	6	serine-type peptidase activity	3.28945e-11	Unigene9720_All	1 351 trypsin precursor LlGtP1 [Lygus lineolaris]	1.314	Up	0.00295	12.677
Molecular Function	GO:0008236	6	serine-type peptidase activity	3.28945e-11	CL3674.Contig2_All	79 1200 minus strand PREDICTED: serine proteinase stubble [Apis mellifera]	1.249	Up	0.0176	41.28
Molecular Function	GO:0008236	6	serine-type peptidase activity	3.28945e-11	CL1553.Contig1_All	3 725 trypsin precursor LlSgP4 [Lygus lineolaris]	1.437	Up	0.0179	26.551
Molecular Function	GO:0008236	6	serine-type peptidase activity	3.28945e-11	Unigene2103_All	161 1036 minus strand secreted salivary trypsin [Triatoma matogrossensis]	1.650	Up	0.0126	32.091
Molecular Function	GO:0008236	6	serine-type peptidase activity	3.28945e-11	Unigene18721_All	2 373 minus strand trypsin precursor LlSgP4 [Lygus lineolaris]	1.758	Up	0.0116	13.846
Molecular Function	GO:0008236	6	serine-type peptidase activity	3.28945e-11	Unigene9788_All	127 537 Plasma kallikrein [Camponotus floridanus]	1.402	Up	0.0294	15.461
Molecular Function	GO:0008236	6	serine-type peptidase activity	3.28945e-11	CL3836.Contig3_All	105 1325 PREDICTED: venom serine carboxypeptidase-like [Bombus terrestris]	5.307	Up	4.49e-05	46.684
Molecular Function	GO:0008236	6	serine-type peptidase activity	3.28945e-11	CL2568.Contig2_All	95 1120 minus strand serine proteinase [Rhodnius prolixus]	1.684	Up	0.0286	36.881
Molecular Function	GO:0008236	6	serine-type peptidase activity	3.28945e-11	Unigene2476_All	9 2690 minus strand Neurotrypsin [Camponotus floridanus]	1.279	Up	0.00891	98.5
Molecular Function	GO:0008234	6	cysteine-type peptidase activity	0.350046	CL1335.Contig2_All	123 1127 GH22826 [Drosophila grimshawi] >gi|193899288|gb|EDV98154.1| GH22826 [Drosophila grimshawi]	1.671	Up	0.0298	37.454
Molecular Function	GO:0008234	6	cysteine-type peptidase activity	0.350046	CL5255.Contig1_All	2 733 cathepsin L-like cysteine protease 1 [Plautia stali]	5.476	Up	0.000372	27.166
Molecular Function	GO:0008234	6	cysteine-type peptidase activity	0.350046	CL2959.Contig1_All	444 1703 minus strand Sentrin-specific protease 1 [Acromyrmex echinatior]	1.213	Up	0.0295	48.526
Molecular Function	GO:0008234	6	cysteine-type peptidase activity	0.350046	Unigene16075_All	173 1174 minus strand cathepsin L-like cysteine protease 2 [Plautia stali]	1.206	Up	0.0277	37.586
Molecular Function	GO:0008234	6	cysteine-type peptidase activity	0.350046	Unigene18171_All	96 1094 minus strand cathepsin b [Aedes aegypti] >gi|54289254|gb|AAV31917.1| lysosomal cathepsin B [Aedes aegypti] >gi|108874249|gb|EAT38474.1| cathepsin b [Aedes aegypti]	1.594	Up	0.0212	36.55
Molecular Function	GO:0070008	7	serine-type exopeptidase activity	0.339506	CL3836.Contig3_All	105 1325 PREDICTED: venom serine carboxypeptidase-like [Bombus terrestris]	5.307	Up	4.49e-05	46.684
Molecular Function	GO:0070008	7	serine-type exopeptidase activity	0.339506	CL3836.Contig1_All	111 1340 minus strand PREDICTED: venom serine carboxypeptidase-like [Bombus terrestris]	4.260	Up	0.000847	46.988
Molecular Function	GO:0030170	5	pyridoxal phosphate binding	0.0262362	Unigene6523_All	2 715 minus strand alanine-glyoxylate aminotransferase [Aedes aegypti] >gi|108884056|gb|EAT48281.1| alanine-glyoxylate aminotransferase [Aedes aegypti]	1.520	Up	0.00318	25.851
Molecular Function	GO:0030170	5	pyridoxal phosphate binding	0.0262362	CL2426.Contig2_All	1 1044 PREDICTED: similar to aromatic amino acid decarboxylase [Tribolium castaneum]	1.660	Up	0.00998	39.698
Molecular Function	GO:0030170	5	pyridoxal phosphate binding	0.0262362	CL750.Contig1_All	387 1769 minus strand PREDICTED: similar to 4-aminobutyrate aminotransferase [Tribolium castaneum]	1.518	Up	0.000565	51.43
Molecular Function	GO:0030170	5	pyridoxal phosphate binding	0.0262362	Unigene3580_All	77 1495 minus strand kynurenine aminotransferase [Glossina morsitans morsitans]	1.320	Up	0.00231	53.372
Molecular Function	GO:0030170	5	pyridoxal phosphate binding	0.0262362	CL1219.Contig2_All	86 1087 minus strand PREDICTED: similar to molybdopterin cofactor sulfurase (mosc) [Tribolium castaneum]	1.385	Up	0.00195	38.328
Molecular Function	GO:0030170	5	pyridoxal phosphate binding	0.0262362	CL2400.Contig1_All	276 1712 minus strand PREDICTED: alanine aminotransferase 2-like [Acyrthosiphon pisum]	1.236	Up	0.0202	53.876
Molecular Function	GO:0016614	4	oxidoreductase activity, acting on CH-OH group of donors	0.186321	Unigene2236_All	208 1902 PREDICTED: glucose dehydrogenase [acceptor]-like isoform 1 [Acyrthosiphon pisum] >gi|328705616|ref|XP_003242858.1| PREDICTED: glucose dehydrogenase [acceptor]-like isoform 2 [Acyrthosiphon pisum]	1.386	Up	0.0329	62.685
Molecular Function	GO:0016614	4	oxidoreductase activity, acting on CH-OH group of donors	0.186321	Unigene4424_All	192 1826 3-hydroxyisobutyrate dehydrogenase [Aedes aegypti] >gi|108877486|gb|EAT41711.1| 3-hydroxyisobutyrate dehydrogenase [Aedes aegypti]	1.219	Up	0.0184	59.562
Molecular Function	GO:0016614	4	oxidoreductase activity, acting on CH-OH group of donors	0.186321	Unigene16828_All	12 1808 PREDICTED: similar to fatty acid synthase [Tribolium castaneum]	1.555	Up	0.0207	65.315
Molecular Function	GO:0016614	4	oxidoreductase activity, acting on CH-OH group of donors	0.186321	Unigene10742_All	23 832 Glucose dehydrogenase [acceptor] [Harpegnathos saltator]	1.300	Up	0.0155	30.221
Molecular Function	GO:0016614	4	oxidoreductase activity, acting on CH-OH group of donors	0.186321	CL1777.Contig1_All	10 630 minus strand 15-hydroxyprostaglandin dehydrogenase [NAD+] [Camponotus floridanus]	1.454	Up	0.0337	23.075
Molecular Function	GO:0016614	4	oxidoreductase activity, acting on CH-OH group of donors	0.186321	CL3352.Contig3_All	283 2016 minus strand Glucose dehydrogenase [acceptor] [Harpegnathos saltator]	2.064	Up	0.02	63.667
Molecular Function	GO:0010181	7	FMN binding	0.377548	Unigene32494_All	"1 225 RecName: Full=Nitric oxide synthase, salivary gland; Short=NOS >gi|1418270|gb|AAB03810.1| nitric oxide synthase [Rhodnius prolixus]"	1.719	Up	0.0297	7.9257
Molecular Function	GO:0010181	7	FMN binding	0.377548	Unigene4441_All	116 694 minus strand PREDICTED: protein CREG2-like [Acyrthosiphon pisum]	2.464	Up	0.000983	21.845
Molecular Function	GO:0003995	5	acyl-CoA dehydrogenase activity	0.447216	Unigene2139_All	163 2151 minus strand PREDICTED: similar to acyl-CoA oxidase [Tribolium castaneum]	1.235	Up	0.0186	75.236
Molecular Function	GO:0003995	5	acyl-CoA dehydrogenase activity	0.447216	Unigene1599_All	"48 1271 PREDICTED: isovaleryl-CoA dehydrogenase, mitochondrial-like [Bombus impatiens]"	1.336	Up	0.0295	44.821
Molecular Function	GO:0008238	6	exopeptidase activity	0.342582	Unigene5688_All	195 1283 Carboxypeptidase B [Camponotus floridanus]	2.957	Up	7.5e-05	41.14
Molecular Function	GO:0008238	6	exopeptidase activity	0.342582	CL3836.Contig3_All	105 1325 PREDICTED: venom serine carboxypeptidase-like [Bombus terrestris]	5.307	Up	4.49e-05	46.684
Molecular Function	GO:0008238	6	exopeptidase activity	0.342582	CL3836.Contig1_All	111 1340 minus strand PREDICTED: venom serine carboxypeptidase-like [Bombus terrestris]	4.260	Up	0.000847	46.988
Molecular Function	GO:0008238	6	exopeptidase activity	0.342582	Unigene14000_All	69 1217 minus strand molting fluid carboxypeptidase A precursor [Bombyx mori] >gi|54114893|dbj|BAD60916.1| molting fluid carboxypeptidase A [Bombyx mori]	1.329	Up	0.0358	43.859
Molecular Function	GO:0016829	3	lyase activity	0.483483	Unigene20333_All	121 957 PREDICTED: N-acetylneuraminate lyase-like isoform 1 [Nasonia vitripennis] >gi|345489918|ref|XP_003426261.1| PREDICTED: N-acetylneuraminate lyase-like isoform 2 [Nasonia vitripennis]	1.570	Up	0.000961	30.868
Molecular Function	GO:0016829	3	lyase activity	0.483483	CL2426.Contig2_All	1 1044 PREDICTED: similar to aromatic amino acid decarboxylase [Tribolium castaneum]	1.660	Up	0.00998	39.698
Molecular Function	GO:0016829	3	lyase activity	0.483483	CL1212.Contig1_All	172 1263 minus strand AGAP003688-PA [Anopheles gambiae str. PEST] >gi|157017532|gb|EAA08948.4| AGAP003688-PA [Anopheles gambiae str. PEST]	1.798	Up	0.00461	40.45
Molecular Function	GO:0016829	3	lyase activity	0.483483	Unigene16828_All	12 1808 PREDICTED: similar to fatty acid synthase [Tribolium castaneum]	1.555	Up	0.0207	65.315
Molecular Function	GO:0016620	5	oxidoreductase activity, acting on the aldehyde or oxo group of donors, NAD or NADP as acceptor	0.537436	Unigene17115_All	204 1901 minus strand PREDICTED: similar to pyrroline-5-carboxylate dehydrogenase [Tribolium castaneum]	1.216	Up	0.00739	62.781
Molecular Function	GO:0016620	5	oxidoreductase activity, acting on the aldehyde or oxo group of donors, NAD or NADP as acceptor	0.537436	Unigene1515_All	49 1545 minus strand GH13324 [Drosophila grimshawi] >gi|193900077|gb|EDV98943.1| GH13324 [Drosophila grimshawi]	1.720	Up	0.0044	55.04
Molecular Function	GO:0004181	8	metallocarboxypeptidase activity	0.377548	Unigene5688_All	195 1283 Carboxypeptidase B [Camponotus floridanus]	2.957	Up	7.5e-05	41.14
Molecular Function	GO:0004181	8	metallocarboxypeptidase activity	0.377548	Unigene14000_All	69 1217 minus strand molting fluid carboxypeptidase A precursor [Bombyx mori] >gi|54114893|dbj|BAD60916.1| molting fluid carboxypeptidase A [Bombyx mori]	1.329	Up	0.0358	43.859
Molecular Function	GO:0046914	6	transition metal ion binding	0.0111579	Unigene5688_All	195 1283 Carboxypeptidase B [Camponotus floridanus]	2.957	Up	7.5e-05	41.14
Molecular Function	GO:0046914	6	transition metal ion binding	0.0111579	Unigene14700_All	93 1583 minus strand cytochrome P450 CYP6AX1 protein [Nilaparvata lugens]	1.972	Up	0.0102	57.202
Molecular Function	GO:0046914	6	transition metal ion binding	0.0111579	Unigene5640_All	154 447 muscle lim protein [Culex quinquefasciatus] >gi|167868441|gb|EDS31824.1| muscle lim protein [Culex quinquefasciatus]	1.490	Up	0.00911	10.608
Molecular Function	GO:0046914	6	transition metal ion binding	0.0111579	CL2752.Contig2_All	63 1547 cytochrome P450 monooxygenase CYP6X1v1 [Lygus lineolaris]	2.892	Up	0.00105	57.102
Molecular Function	GO:0046914	6	transition metal ion binding	0.0111579	Unigene4577_All	232 1386 RING finger protein 13 [Camponotus floridanus]	1.242	Up	0.0197	43.532
Molecular Function	GO:0046914	6	transition metal ion binding	0.0111579	Unigene6391_All	80 2734 minus strand PREDICTED: endoplasmic reticulum aminopeptidase 2-like [Acyrthosiphon pisum]	1.276	Up	0.0109	100.35
Molecular Function	GO:0046914	6	transition metal ion binding	0.0111579	Unigene12673_All	106 1587 minus strand cytochrome P450 monooxygenase CYP6X1v1 [Lygus lineolaris]	1.513	Up	0.00988	57.101
Molecular Function	GO:0046914	6	transition metal ion binding	0.0111579	Unigene20257_All	241 1761 minus strand cytochrome P450 CYP6AX1 protein [Nilaparvata lugens]	1.462	Up	9.49e-05	58.215
Molecular Function	GO:0046914	6	transition metal ion binding	0.0111579	Unigene25864_All	3 767 minus strand Aminopeptidase N [Harpegnathos saltator]	1.246	Up	0.0448	29.413
Molecular Function	GO:0046914	6	transition metal ion binding	0.0111579	CL1001.Contig1_All	127 1665 cytochrome P450 4A6 [Culex quinquefasciatus] >gi|167881331|gb|EDS44714.1| cytochrome P450 4A6 [Culex quinquefasciatus]	1.324	Up	0.00721	59.313
Molecular Function	GO:0046914	6	transition metal ion binding	0.0111579	Unigene3595_All	57 1514 minus strand PREDICTED: probable cytochrome P450 305a1-like [Bombus terrestris]	2.505	Up	0.0022	55.754
Molecular Function	GO:0046914	6	transition metal ion binding	0.0111579	CL3835.Contig1_All	87 2759 minus strand PREDICTED: similar to protease m1 zinc metalloprotease [Tribolium castaneum]	2.202	Up	0.0312	103.68
Molecular Function	GO:0046914	6	transition metal ion binding	0.0111579	CL1219.Contig2_All	86 1087 minus strand PREDICTED: similar to molybdopterin cofactor sulfurase (mosc) [Tribolium castaneum]	1.385	Up	0.00195	38.328
Molecular Function	GO:0046914	6	transition metal ion binding	0.0111579	CL3790.Contig1_All	2 1237 minus strand cytochrome P450 [Aedes aegypti] >gi|108874803|gb|EAT39028.1| cytochrome P450 [Aedes aegypti]	1.263	Up	0.032	48.455
Molecular Function	GO:0046914	6	transition metal ion binding	0.0111579	CL3702.Contig1_All	256 1623 minus strand PREDICTED: similar to cytochrome P450 [Tribolium castaneum]	1.682	Up	3.1e-05	52.65
Molecular Function	GO:0046914	6	transition metal ion binding	0.0111579	CL3562.Contig2_All	277 1620 Sequestosome-1 [Harpegnathos saltator]	1.358	Up	0.0184	48.208
Molecular Function	GO:0046914	6	transition metal ion binding	0.0111579	CL1079.Contig2_All	235 1698 cytochrome P450 [Hodotermopsis sjoestedti]	1.360	Up	0.00777	55.722
Molecular Function	GO:0046914	6	transition metal ion binding	0.0111579	CL4370.Contig2_All	40 1515 minus strand cytochrome P450 monooxygenase CYP6X1v1 [Lygus lineolaris]	1.896	Up	0.0375	56.987
Molecular Function	GO:0046914	6	transition metal ion binding	0.0111579	CL1830.Contig1_All	165 1670 cytochrome P450 monooxygenase CYP6X1v1 [Lygus lineolaris]	1.304	Up	0.0186	58.03
Molecular Function	GO:0046914	6	transition metal ion binding	0.0111579	Unigene1596_All	185 700 ferritin [Triatoma infestans]	2.387	Up	0.00304	19.469
Molecular Function	GO:0046914	6	transition metal ion binding	0.0111579	Unigene14000_All	69 1217 minus strand molting fluid carboxypeptidase A precursor [Bombyx mori] >gi|54114893|dbj|BAD60916.1| molting fluid carboxypeptidase A [Bombyx mori]	1.329	Up	0.0358	43.859
Molecular Function	GO:0046914	6	transition metal ion binding	0.0111579	Unigene8711_All	78 1565 minus strand cytochrome P450 [Nilaparvata lugens]	3.474	Up	0.0104	56.837
Molecular Function	GO:0046914	6	transition metal ion binding	0.0111579	Unigene5754_All	192 584 minus strand E3 ubiquitin ligase [Triatoma infestans]	1.263	Up	0.0125	14.236
Molecular Function	GO:0030246	3	carbohydrate binding	0.744891	Unigene10842_All	435 3059 minus strand PREDICTED: similar to acid alpha-glucosidase [Tribolium castaneum]	1.289	Up	0.0316	98.189
Molecular Function	GO:0030246	3	carbohydrate binding	0.744891	CL4869.Contig1_All	"69 329 minus strand PREDICTED: similar to rhamnose-binding lectin (SAL), partial [Strongylocentrotus purpuratus]"	1.330	Up	0.0208	9.6829
Molecular Function	GO:0032403	4	protein complex binding	0.635342	Unigene6401_All	79 1080 minus strand PREDICTED: similar to sec-23 interacting protein P125 [Tribolium castaneum]	1.225	Up	0.0189	38.298
Molecular Function	GO:0032403	4	protein complex binding	0.635342	Unigene3339_All	21 584 minus strand PREDICTED: talin-2-like [Bombus impatiens]	1.262	Up	0.0179	19.099
Molecular Function	GO:0005549	3	odorant binding	0.537436	Unigene5485_All	308 631 odorant binding protein 14 [Adelphocoris lineolatus]	1.554	Up	0.0145	12.15
Molecular Function	GO:0005549	3	odorant binding	0.537436	Unigene9705_All	113 637 odorant-binding protein RproOBP6 precursor [Rhodnius prolixus]	1.550	Up	0.00626	18.992
Molecular Function	GO:0046906	4	tetrapyrrole binding	0.000869483	Unigene20815_All	120 434 minus strand GH11376 [Drosophila grimshawi] >gi|193904829|gb|EDW03696.1| GH11376 [Drosophila grimshawi]	1.210	Up	0.000666	11.752
Molecular Function	GO:0046906	4	tetrapyrrole binding	0.000869483	Unigene14700_All	93 1583 minus strand cytochrome P450 CYP6AX1 protein [Nilaparvata lugens]	1.972	Up	0.0102	57.202
Molecular Function	GO:0046906	4	tetrapyrrole binding	0.000869483	CL3790.Contig1_All	2 1237 minus strand cytochrome P450 [Aedes aegypti] >gi|108874803|gb|EAT39028.1| cytochrome P450 [Aedes aegypti]	1.263	Up	0.032	48.455
Molecular Function	GO:0046906	4	tetrapyrrole binding	0.000869483	CL2752.Contig2_All	63 1547 cytochrome P450 monooxygenase CYP6X1v1 [Lygus lineolaris]	2.892	Up	0.00105	57.102
Molecular Function	GO:0046906	4	tetrapyrrole binding	0.000869483	CL3702.Contig1_All	256 1623 minus strand PREDICTED: similar to cytochrome P450 [Tribolium castaneum]	1.682	Up	3.1e-05	52.65
Molecular Function	GO:0046906	4	tetrapyrrole binding	0.000869483	Unigene12673_All	106 1587 minus strand cytochrome P450 monooxygenase CYP6X1v1 [Lygus lineolaris]	1.513	Up	0.00988	57.101
Molecular Function	GO:0046906	4	tetrapyrrole binding	0.000869483	Unigene20257_All	241 1761 minus strand cytochrome P450 CYP6AX1 protein [Nilaparvata lugens]	1.462	Up	9.49e-05	58.215
Molecular Function	GO:0046906	4	tetrapyrrole binding	0.000869483	CL1079.Contig2_All	235 1698 cytochrome P450 [Hodotermopsis sjoestedti]	1.360	Up	0.00777	55.722
Molecular Function	GO:0046906	4	tetrapyrrole binding	0.000869483	CL4370.Contig2_All	40 1515 minus strand cytochrome P450 monooxygenase CYP6X1v1 [Lygus lineolaris]	1.896	Up	0.0375	56.987
Molecular Function	GO:0046906	4	tetrapyrrole binding	0.000869483	CL1830.Contig1_All	165 1670 cytochrome P450 monooxygenase CYP6X1v1 [Lygus lineolaris]	1.304	Up	0.0186	58.03
Molecular Function	GO:0046906	4	tetrapyrrole binding	0.000869483	CL1001.Contig1_All	127 1665 cytochrome P450 4A6 [Culex quinquefasciatus] >gi|167881331|gb|EDS44714.1| cytochrome P450 4A6 [Culex quinquefasciatus]	1.324	Up	0.00721	59.313
Molecular Function	GO:0046906	4	tetrapyrrole binding	0.000869483	Unigene8711_All	78 1565 minus strand cytochrome P450 [Nilaparvata lugens]	3.474	Up	0.0104	56.837
Molecular Function	GO:0046906	4	tetrapyrrole binding	0.000869483	Unigene3595_All	57 1514 minus strand PREDICTED: probable cytochrome P450 305a1-like [Bombus terrestris]	2.505	Up	0.0022	55.754
Molecular Function	GO:0008237	6	metallopeptidase activity	0.41664	Unigene6391_All	80 2734 minus strand PREDICTED: endoplasmic reticulum aminopeptidase 2-like [Acyrthosiphon pisum]	1.276	Up	0.0109	100.35
Molecular Function	GO:0008237	6	metallopeptidase activity	0.41664	Unigene5688_All	195 1283 Carboxypeptidase B [Camponotus floridanus]	2.957	Up	7.5e-05	41.14
Molecular Function	GO:0008237	6	metallopeptidase activity	0.41664	Unigene25864_All	3 767 minus strand Aminopeptidase N [Harpegnathos saltator]	1.246	Up	0.0448	29.413
Molecular Function	GO:0008237	6	metallopeptidase activity	0.41664	Unigene14000_All	69 1217 minus strand molting fluid carboxypeptidase A precursor [Bombyx mori] >gi|54114893|dbj|BAD60916.1| molting fluid carboxypeptidase A [Bombyx mori]	1.329	Up	0.0358	43.859
Molecular Function	GO:0008237	6	metallopeptidase activity	0.41664	CL3835.Contig1_All	87 2759 minus strand PREDICTED: similar to protease m1 zinc metalloprotease [Tribolium castaneum]	2.202	Up	0.0312	103.68
Molecular Function	GO:0008061	4	chitin binding	0.0338024	Unigene14133_All	37 726 cuticular protein analogous to peritrophins 3-A1 precursor [Tribolium castaneum] >gi|268309018|gb|ACY95475.1| cuticular protein analogous to peritrophins 3-A1 [Tribolium castaneum]	2.137	Up	0.0162	25.705
Molecular Function	GO:0008061	4	chitin binding	0.0338024	Unigene20356_All	32 805 minus strand cuticular protein analogous to peritrophins 3-C5 isoform 1 precursor [Tribolium castaneum] >gi|119387888|gb|ABL73929.1| obstractor C1 [Tribolium castaneum]	1.945	Up	0.0291	28.486
Molecular Function	GO:0008061	4	chitin binding	0.0338024	Unigene4928_All	133 339 minus strand cuticular protein analogous to peritrophins 3-A2 precursor [Tribolium castaneum] >gi|268309020|gb|ACY95476.1| cuticular protein analogous to peritrophins 3-A2 [Tribolium castaneum]	2.334	Up	0.0271	7.4783
Molecular Function	GO:0008061	4	chitin binding	0.0338024	Unigene20314_All	82 735 minus strand cuticular protein analogous to peritrophins 3-D1 [Danaus plexippus]	1.222	Up	0.00866	23.908
Molecular Function	GO:0008061	4	chitin binding	0.0338024	Unigene3696_All	108 797 minus strand cuticular protein analogous to peritrophins 3-B precursor [Acyrthosiphon pisum]	1.551	Up	0.0287	26.381
Molecular Function	GO:0008061	4	chitin binding	0.0338024	Unigene18191_All	60 1661 minus strand GI13501 [Drosophila mojavensis] >gi|193920062|gb|EDW18929.1| GI13501 [Drosophila mojavensis]	1.482	Up	0.0388	60.896
Molecular Function	GO:0016491	3	oxidoreductase activity	0.00760208	CL3383.Contig3_All	152 1546 minus strand PREDICTED: peroxisomal N(1)-acetyl-spermine/spermidine oxidase-like [Bombus terrestris]	1.592	Up	0.00239	52.216
Molecular Function	GO:0016491	3	oxidoreductase activity	0.00760208	Unigene17115_All	204 1901 minus strand PREDICTED: similar to pyrroline-5-carboxylate dehydrogenase [Tribolium castaneum]	1.216	Up	0.00739	62.781
Molecular Function	GO:0016491	3	oxidoreductase activity	0.00760208	Unigene12673_All	106 1587 minus strand cytochrome P450 monooxygenase CYP6X1v1 [Lygus lineolaris]	1.513	Up	0.00988	57.101
Molecular Function	GO:0016491	3	oxidoreductase activity	0.00760208	Unigene20257_All	241 1761 minus strand cytochrome P450 CYP6AX1 protein [Nilaparvata lugens]	1.462	Up	9.49e-05	58.215
Molecular Function	GO:0016491	3	oxidoreductase activity	0.00760208	Unigene10742_All	23 832 Glucose dehydrogenase [acceptor] [Harpegnathos saltator]	1.300	Up	0.0155	30.221
Molecular Function	GO:0016491	3	oxidoreductase activity	0.00760208	CL3965.Contig2_All	136 1092 minus strand PREDICTED: alcohol dehydrogenase [NADP+] A-like [Apis mellifera]	1.240	Up	0.0393	36.218
Molecular Function	GO:0016491	3	oxidoreductase activity	0.00760208	Unigene8465_All	23 1945 minus strand PREDICTED: aldehyde oxidase-like [Bombus terrestris]	1.583	Up	0.00291	71.07
Molecular Function	GO:0016491	3	oxidoreductase activity	0.00760208	Unigene9980_All	96 1034 minus strand PREDICTED: similar to CG6084 CG6084-PA [Tribolium castaneum]	1.308	Up	0.00448	35.758
Molecular Function	GO:0016491	3	oxidoreductase activity	0.00760208	Unigene9699_All	3 683 minus strand oxidoreductase [Triatoma infestans]	1.355	Up	0.0341	24.274
Molecular Function	GO:0016491	3	oxidoreductase activity	0.00760208	CL3702.Contig1_All	256 1623 minus strand PREDICTED: similar to cytochrome P450 [Tribolium castaneum]	1.682	Up	3.1e-05	52.65
Molecular Function	GO:0016491	3	oxidoreductase activity	0.00760208	Unigene4424_All	192 1826 3-hydroxyisobutyrate dehydrogenase [Aedes aegypti] >gi|108877486|gb|EAT41711.1| 3-hydroxyisobutyrate dehydrogenase [Aedes aegypti]	1.219	Up	0.0184	59.562
Molecular Function	GO:0016491	3	oxidoreductase activity	0.00760208	CL1079.Contig2_All	235 1698 cytochrome P450 [Hodotermopsis sjoestedti]	1.360	Up	0.00777	55.722
Molecular Function	GO:0016491	3	oxidoreductase activity	0.00760208	CL4370.Contig2_All	40 1515 minus strand cytochrome P450 monooxygenase CYP6X1v1 [Lygus lineolaris]	1.896	Up	0.0375	56.987
Molecular Function	GO:0016491	3	oxidoreductase activity	0.00760208	CL3352.Contig3_All	283 2016 minus strand Glucose dehydrogenase [acceptor] [Harpegnathos saltator]	2.064	Up	0.02	63.667
Molecular Function	GO:0016491	3	oxidoreductase activity	0.00760208	CL1917.Contig1_All	223 1527 FAD-dependent oxidoreductase domain-containing protein 1 [Camponotus floridanus]	1.427	Up	0.0151	48.359
Molecular Function	GO:0016491	3	oxidoreductase activity	0.00760208	Unigene8711_All	78 1565 minus strand cytochrome P450 [Nilaparvata lugens]	3.474	Up	0.0104	56.837
Molecular Function	GO:0016491	3	oxidoreductase activity	0.00760208	Unigene14958_All	206 616 Cu/Zn superoxide dismutase [Cavia porcellus]	1.323	Up	0.0123	14.147
Molecular Function	GO:0016491	3	oxidoreductase activity	0.00760208	Unigene14700_All	93 1583 minus strand cytochrome P450 CYP6AX1 protein [Nilaparvata lugens]	1.972	Up	0.0102	57.202
Molecular Function	GO:0016491	3	oxidoreductase activity	0.00760208	CL2752.Contig2_All	63 1547 cytochrome P450 monooxygenase CYP6X1v1 [Lygus lineolaris]	2.892	Up	0.00105	57.102
Molecular Function	GO:0016491	3	oxidoreductase activity	0.00760208	Unigene2139_All	163 2151 minus strand PREDICTED: similar to acyl-CoA oxidase [Tribolium castaneum]	1.235	Up	0.0186	75.236
Molecular Function	GO:0016491	3	oxidoreductase activity	0.00760208	CL1001.Contig1_All	127 1665 cytochrome P450 4A6 [Culex quinquefasciatus] >gi|167881331|gb|EDS44714.1| cytochrome P450 4A6 [Culex quinquefasciatus]	1.324	Up	0.00721	59.313
Molecular Function	GO:0016491	3	oxidoreductase activity	0.00760208	Unigene3595_All	57 1514 minus strand PREDICTED: probable cytochrome P450 305a1-like [Bombus terrestris]	2.505	Up	0.0022	55.754
Molecular Function	GO:0016491	3	oxidoreductase activity	0.00760208	Unigene3689_All	145 879 minus strand Estradiol 17-beta-dehydrogenase 8 [Harpegnathos saltator]	1.661	Up	0.000122	26.048
Molecular Function	GO:0016491	3	oxidoreductase activity	0.00760208	Unigene16828_All	12 1808 PREDICTED: similar to fatty acid synthase [Tribolium castaneum]	1.555	Up	0.0207	65.315
Molecular Function	GO:0016491	3	oxidoreductase activity	0.00760208	Unigene1599_All	"48 1271 PREDICTED: isovaleryl-CoA dehydrogenase, mitochondrial-like [Bombus impatiens]"	1.336	Up	0.0295	44.821
Molecular Function	GO:0016491	3	oxidoreductase activity	0.00760208	CL1777.Contig1_All	10 630 minus strand 15-hydroxyprostaglandin dehydrogenase [NAD+] [Camponotus floridanus]	1.454	Up	0.0337	23.075
Molecular Function	GO:0016491	3	oxidoreductase activity	0.00760208	Unigene4441_All	116 694 minus strand PREDICTED: protein CREG2-like [Acyrthosiphon pisum]	2.464	Up	0.000983	21.845
Molecular Function	GO:0016491	3	oxidoreductase activity	0.00760208	CL3790.Contig1_All	2 1237 minus strand cytochrome P450 [Aedes aegypti] >gi|108874803|gb|EAT39028.1| cytochrome P450 [Aedes aegypti]	1.263	Up	0.032	48.455
Molecular Function	GO:0016491	3	oxidoreductase activity	0.00760208	Unigene7813_All	"145 1785 minus strand PREDICTED: glutamate dehydrogenase, mitochondrial-like [Acyrthosiphon pisum]"	1.593	Up	1.42e-05	60.613
Molecular Function	GO:0016491	3	oxidoreductase activity	0.00760208	Unigene18282_All	400 1320 PREDICTED: similar to CG6084 CG6084-PA [Tribolium castaneum]	1.300	Up	0.00649	34.703
Molecular Function	GO:0016491	3	oxidoreductase activity	0.00760208	Unigene1515_All	49 1545 minus strand GH13324 [Drosophila grimshawi] >gi|193900077|gb|EDV98943.1| GH13324 [Drosophila grimshawi]	1.720	Up	0.0044	55.04
Molecular Function	GO:0016491	3	oxidoreductase activity	0.00760208	Unigene2236_All	208 1902 PREDICTED: glucose dehydrogenase [acceptor]-like isoform 1 [Acyrthosiphon pisum] >gi|328705616|ref|XP_003242858.1| PREDICTED: glucose dehydrogenase [acceptor]-like isoform 2 [Acyrthosiphon pisum]	1.386	Up	0.0329	62.685
Molecular Function	GO:0016491	3	oxidoreductase activity	0.00760208	CL1830.Contig1_All	165 1670 cytochrome P450 monooxygenase CYP6X1v1 [Lygus lineolaris]	1.304	Up	0.0186	58.03
Molecular Function	GO:0004175	6	endopeptidase activity	3.02233e-07	Unigene1559_All	93 848 minus strand salivary trypsin [Triatoma matogrossensis]	1.469	Up	0.00676	28.054
Molecular Function	GO:0004175	6	endopeptidase activity	3.02233e-07	Unigene10388_All	2 361 minus strand PREDICTED: venom serine protease 34 [Apis mellifera]	1.390	Up	0.0454	13.046
Molecular Function	GO:0004175	6	endopeptidase activity	3.02233e-07	Unigene18009_All	1 708 minus strand trypsin precursor LlGtP1 [Lygus lineolaris]	1.605	Up	0.0142	26.422
Molecular Function	GO:0004175	6	endopeptidase activity	3.02233e-07	Unigene3411_All	2 721 minus strand trypsin precursor LlSgP4 [Lygus lineolaris]	1.703	Up	0.00225	26.811
Molecular Function	GO:0004175	6	endopeptidase activity	3.02233e-07	CL3794.Contig2_All	76 906 trypsin precursor LlGtP1 [Lygus lineolaris]	1.572	Up	0.023	30.773
Molecular Function	GO:0004175	6	endopeptidase activity	3.02233e-07	Unigene13874_All	1 726 trypsin precursor LlSgP4 [Lygus lineolaris]	1.530	Up	0.00491	26.801
Molecular Function	GO:0004175	6	endopeptidase activity	3.02233e-07	Unigene1577_All	53 862 minus strand trypsin precursor LlSgP3 [Lygus lineolaris]	1.651	Up	0.0492	29.989
Molecular Function	GO:0004175	6	endopeptidase activity	3.02233e-07	CL1236.Contig2_All	26 334 salivary trypsin [Triatoma infestans]	1.451	Up	0.0132	11.226
Molecular Function	GO:0004175	6	endopeptidase activity	3.02233e-07	CL2683.Contig1_All	3 557 minus strand serine protease [Laccotrephes japonensis]	1.575	Up	0.00338	20.491
Molecular Function	GO:0004175	6	endopeptidase activity	3.02233e-07	CL1296.Contig1_All	69 848 trypsin precursor LlSgP4 [Lygus lineolaris]	1.682	Up	0.0299	28.698
Molecular Function	GO:0004175	6	endopeptidase activity	3.02233e-07	CL184.Contig3_All	103 984 minus strand secreted salivary trypsin [Triatoma matogrossensis]	2.021	Up	0.0175	32.214
Molecular Function	GO:0004175	6	endopeptidase activity	3.02233e-07	Unigene13889_All	1 714 minus strand trypsin-like protease [Ranatra unicolor]	1.330	Up	0.0424	26.457
Molecular Function	GO:0004175	6	endopeptidase activity	3.02233e-07	CL515.Contig1_All	5 706 minus strand trypsin precursor LlSgP3 [Lygus lineolaris]	1.681	Up	0.0214	25.644
Molecular Function	GO:0004175	6	endopeptidase activity	3.02233e-07	CL1296.Contig3_All	111 866 trypsin precursor LlSgP4 [Lygus lineolaris]	1.754	Up	0.0419	27.783
Molecular Function	GO:0004175	6	endopeptidase activity	3.02233e-07	Unigene9867_All	110 1279 minus strand aspartate protease cathepsin D [Triatoma infestans]	1.498	Up	0.00556	42.518
Molecular Function	GO:0004175	6	endopeptidase activity	3.02233e-07	Unigene18257_All	90 848 minus strand trypsin-like protease [Ranatra unicolor]	1.656	Up	0.0351	28.034
Molecular Function	GO:0004175	6	endopeptidase activity	3.02233e-07	Unigene18171_All	96 1094 minus strand cathepsin b [Aedes aegypti] >gi|54289254|gb|AAV31917.1| lysosomal cathepsin B [Aedes aegypti] >gi|108874249|gb|EAT38474.1| cathepsin b [Aedes aegypti]	1.594	Up	0.0212	36.55
Molecular Function	GO:0004175	6	endopeptidase activity	3.02233e-07	Unigene10407_All	202 387 minus strand GH14281 [Drosophila grimshawi] >gi|193892526|gb|EDV91392.1| GH14281 [Drosophila grimshawi]	1.422	Up	0.0428	6.7216
Molecular Function	GO:0004175	6	endopeptidase activity	3.02233e-07	Unigene9720_All	1 351 trypsin precursor LlGtP1 [Lygus lineolaris]	1.314	Up	0.00295	12.677
Molecular Function	GO:0004175	6	endopeptidase activity	3.02233e-07	CL3674.Contig2_All	79 1200 minus strand PREDICTED: serine proteinase stubble [Apis mellifera]	1.249	Up	0.0176	41.28
Molecular Function	GO:0004175	6	endopeptidase activity	3.02233e-07	CL1553.Contig1_All	3 725 trypsin precursor LlSgP4 [Lygus lineolaris]	1.437	Up	0.0179	26.551
Molecular Function	GO:0004175	6	endopeptidase activity	3.02233e-07	Unigene2103_All	161 1036 minus strand secreted salivary trypsin [Triatoma matogrossensis]	1.650	Up	0.0126	32.091
Molecular Function	GO:0004175	6	endopeptidase activity	3.02233e-07	Unigene18721_All	2 373 minus strand trypsin precursor LlSgP4 [Lygus lineolaris]	1.758	Up	0.0116	13.846
Molecular Function	GO:0004175	6	endopeptidase activity	3.02233e-07	Unigene9788_All	127 537 Plasma kallikrein [Camponotus floridanus]	1.402	Up	0.0294	15.461
Molecular Function	GO:0004175	6	endopeptidase activity	3.02233e-07	CL2568.Contig2_All	95 1120 minus strand serine proteinase [Rhodnius prolixus]	1.684	Up	0.0286	36.881
Molecular Function	GO:0004175	6	endopeptidase activity	3.02233e-07	Unigene2476_All	9 2690 minus strand Neurotrypsin [Camponotus floridanus]	1.279	Up	0.00891	98.5
Molecular Function	GO:0016627	4	oxidoreductase activity, acting on the CH-CH group of donors	0.405364	Unigene2139_All	163 2151 minus strand PREDICTED: similar to acyl-CoA oxidase [Tribolium castaneum]	1.235	Up	0.0186	75.236
Molecular Function	GO:0016627	4	oxidoreductase activity, acting on the CH-CH group of donors	0.405364	Unigene16828_All	12 1808 PREDICTED: similar to fatty acid synthase [Tribolium castaneum]	1.555	Up	0.0207	65.315
Molecular Function	GO:0016627	4	oxidoreductase activity, acting on the CH-CH group of donors	0.405364	Unigene1599_All	"48 1271 PREDICTED: isovaleryl-CoA dehydrogenase, mitochondrial-like [Bombus impatiens]"	1.336	Up	0.0295	44.821
Molecular Function	GO:0042578	5	phosphoric ester hydrolase activity	0.166671	CL1177.Contig2_All	60 578 minus strand PREDICTED: similar to Phosphatidylinositol-specific phospholipase C X domain-containing protein 2 (PI-PLC X domain-containing protein 2) [Ciona intestinalis]	1.669	Up	0.015	19.72
Molecular Function	GO:0042578	5	phosphoric ester hydrolase activity	0.166671	Unigene14708_All	4 1056 minus strand PREDICTED: prostatic acid phosphatase-like [Apis mellifera]	1.346	Up	0.0166	40.408
Molecular Function	GO:0042578	5	phosphoric ester hydrolase activity	0.166671	CL4590.Contig2_All	1 852 minus strand acid phosphatase-1 [Culex quinquefasciatus] >gi|167880900|gb|EDS44283.1| acid phosphatase-1 [Culex quinquefasciatus]	1.234	Up	0.0149	33.112
Molecular Function	GO:0042578	5	phosphoric ester hydrolase activity	0.166671	Unigene33361_All	1 240 minus strand PREDICTED: similar to synaptojanin [Tribolium castaneum]	1.262	Up	0.0429	8.9661
Molecular Function	GO:0042578	5	phosphoric ester hydrolase activity	0.166671	Unigene8718_All	"118 1773 PREDICTED: cAMP-specific 3',5'-cyclic phosphodiesterase [Apis mellifera]"	1.426	Up	0.0121	62.35
Molecular Function	GO:0042578	5	phosphoric ester hydrolase activity	0.166671	Unigene7928_All	69 893 minus strand Inositol monophosphatase [Camponotus floridanus]	1.292	Up	0.0305	30.38
Molecular Function	GO:0004185	8	serine-type carboxypeptidase activity	0.29915	CL3836.Contig3_All	105 1325 PREDICTED: venom serine carboxypeptidase-like [Bombus terrestris]	5.307	Up	4.49e-05	46.684
Molecular Function	GO:0004185	8	serine-type carboxypeptidase activity	0.29915	CL3836.Contig1_All	111 1340 minus strand PREDICTED: venom serine carboxypeptidase-like [Bombus terrestris]	4.260	Up	0.000847	46.988
Molecular Function	GO:0016787	3	hydrolase activity	2.43586e-05	Unigene13787_All	85 486 minus strand GJ21009 [Drosophila virilis] >gi|194143788|gb|EDW60184.1| GJ21009 [Drosophila virilis]	1.294	Up	0.018	14.569
Molecular Function	GO:0016787	3	hydrolase activity	2.43586e-05	Unigene6401_All	79 1080 minus strand PREDICTED: similar to sec-23 interacting protein P125 [Tribolium castaneum]	1.225	Up	0.0189	38.298
Molecular Function	GO:0016787	3	hydrolase activity	2.43586e-05	Unigene5688_All	195 1283 Carboxypeptidase B [Camponotus floridanus]	2.957	Up	7.5e-05	41.14
Molecular Function	GO:0016787	3	hydrolase activity	2.43586e-05	Unigene16075_All	173 1174 minus strand cathepsin L-like cysteine protease 2 [Plautia stali]	1.206	Up	0.0277	37.586
Molecular Function	GO:0016787	3	hydrolase activity	2.43586e-05	Unigene10842_All	435 3059 minus strand PREDICTED: similar to acid alpha-glucosidase [Tribolium castaneum]	1.289	Up	0.0316	98.189
Molecular Function	GO:0016787	3	hydrolase activity	2.43586e-05	Unigene1559_All	93 848 minus strand salivary trypsin [Triatoma matogrossensis]	1.469	Up	0.00676	28.054
Molecular Function	GO:0016787	3	hydrolase activity	2.43586e-05	Unigene10388_All	2 361 minus strand PREDICTED: venom serine protease 34 [Apis mellifera]	1.390	Up	0.0454	13.046
Molecular Function	GO:0016787	3	hydrolase activity	2.43586e-05	Unigene18009_All	1 708 minus strand trypsin precursor LlGtP1 [Lygus lineolaris]	1.605	Up	0.0142	26.422
Molecular Function	GO:0016787	3	hydrolase activity	2.43586e-05	CL1335.Contig2_All	123 1127 GH22826 [Drosophila grimshawi] >gi|193899288|gb|EDV98154.1| GH22826 [Drosophila grimshawi]	1.671	Up	0.0298	37.454
Molecular Function	GO:0016787	3	hydrolase activity	2.43586e-05	Unigene13874_All	1 726 trypsin precursor LlSgP4 [Lygus lineolaris]	1.530	Up	0.00491	26.801
Molecular Function	GO:0016787	3	hydrolase activity	2.43586e-05	Unigene1577_All	53 862 minus strand trypsin precursor LlSgP3 [Lygus lineolaris]	1.651	Up	0.0492	29.989
Molecular Function	GO:0016787	3	hydrolase activity	2.43586e-05	CL1236.Contig2_All	26 334 salivary trypsin [Triatoma infestans]	1.451	Up	0.0132	11.226
Molecular Function	GO:0016787	3	hydrolase activity	2.43586e-05	Unigene6405_All	4 2583 PREDICTED: multidrug resistance-associated protein 1-like isoform 3 [Nasonia vitripennis]	1.250	Up	0.0395	96.469
Molecular Function	GO:0016787	3	hydrolase activity	2.43586e-05	Unigene6391_All	80 2734 minus strand PREDICTED: endoplasmic reticulum aminopeptidase 2-like [Acyrthosiphon pisum]	1.276	Up	0.0109	100.35
Molecular Function	GO:0016787	3	hydrolase activity	2.43586e-05	CL3173.Contig1_All	"123 833 minus strand pre-mrna cleavage factor im, 25kD subunit [Aedes aegypti] >gi|157118316|ref|XP_001653167.1| pre-mrna cleavage factor im, 25kD subunit [Aedes aegypti] >gi|108880136|gb|EAT44361.1| pre-mrna cleavage factor im, 25kD subunit [Aedes aegypti] >gi|108883290|gb|EAT47515.1| pre-mrna cleavage factor im, 25kD subunit [Aedes aegypti]"	1.267	Up	0.0029	26.843
Molecular Function	GO:0016787	3	hydrolase activity	2.43586e-05	Unigene25864_All	3 767 minus strand Aminopeptidase N [Harpegnathos saltator]	1.246	Up	0.0448	29.413
Molecular Function	GO:0016787	3	hydrolase activity	2.43586e-05	CL3836.Contig1_All	111 1340 minus strand PREDICTED: venom serine carboxypeptidase-like [Bombus terrestris]	4.260	Up	0.000847	46.988
Molecular Function	GO:0016787	3	hydrolase activity	2.43586e-05	Unigene14482_All	89 445 minus strand Putative transthyretin-like protein ZK697.8 [Camponotus floridanus]	1.259	Up	0.0236	13.583
Molecular Function	GO:0016787	3	hydrolase activity	2.43586e-05	CL2959.Contig1_All	444 1703 minus strand Sentrin-specific protease 1 [Acromyrmex echinatior]	1.213	Up	0.0295	48.526
Molecular Function	GO:0016787	3	hydrolase activity	2.43586e-05	Unigene9903_All	"226 1539 minus strand PREDICTED: similar to fucosidase, alpha-L- 2, plasma [Tribolium castaneum]"	1.227	Up	0.00429	50.82
Molecular Function	GO:0016787	3	hydrolase activity	2.43586e-05	CL515.Contig1_All	5 706 minus strand trypsin precursor LlSgP3 [Lygus lineolaris]	1.681	Up	0.0214	25.644
Molecular Function	GO:0016787	3	hydrolase activity	2.43586e-05	CL1296.Contig3_All	111 866 trypsin precursor LlSgP4 [Lygus lineolaris]	1.754	Up	0.0419	27.783
Molecular Function	GO:0016787	3	hydrolase activity	2.43586e-05	Unigene10540_All	49 1608 79 kDa salivary apyrase precursor [Triatoma infestans]	1.353	Up	0.0176	57.061
Molecular Function	GO:0016787	3	hydrolase activity	2.43586e-05	Unigene9867_All	110 1279 minus strand aspartate protease cathepsin D [Triatoma infestans]	1.498	Up	0.00556	42.518
Molecular Function	GO:0016787	3	hydrolase activity	2.43586e-05	Unigene18257_All	90 848 minus strand trypsin-like protease [Ranatra unicolor]	1.656	Up	0.0351	28.034
Molecular Function	GO:0016787	3	hydrolase activity	2.43586e-05	CL3451.Contig2_All	91 1731 PREDICTED: venom carboxylesterase-6-like [Acyrthosiphon pisum]	1.547	Up	0.00829	60.716
Molecular Function	GO:0016787	3	hydrolase activity	2.43586e-05	CL5255.Contig1_All	2 733 cathepsin L-like cysteine protease 1 [Plautia stali]	5.476	Up	0.000372	27.166
Molecular Function	GO:0016787	3	hydrolase activity	2.43586e-05	Unigene22151_All	114 1052 minus strand PREDICTED: serine/threonine-protein phosphatase 2B catalytic subunit 3-like [Acyrthosiphon pisum]	1.254	Up	0.0246	35.707
Molecular Function	GO:0016787	3	hydrolase activity	2.43586e-05	Unigene2103_All	161 1036 minus strand secreted salivary trypsin [Triatoma matogrossensis]	1.650	Up	0.0126	32.091
Molecular Function	GO:0016787	3	hydrolase activity	2.43586e-05	Unigene18721_All	2 373 minus strand trypsin precursor LlSgP4 [Lygus lineolaris]	1.758	Up	0.0116	13.846
Molecular Function	GO:0016787	3	hydrolase activity	2.43586e-05	Unigene9788_All	127 537 Plasma kallikrein [Camponotus floridanus]	1.402	Up	0.0294	15.461
Molecular Function	GO:0016787	3	hydrolase activity	2.43586e-05	Unigene8718_All	"118 1773 PREDICTED: cAMP-specific 3',5'-cyclic phosphodiesterase [Apis mellifera]"	1.426	Up	0.0121	62.35
Molecular Function	GO:0016787	3	hydrolase activity	2.43586e-05	Unigene14000_All	69 1217 minus strand molting fluid carboxypeptidase A precursor [Bombyx mori] >gi|54114893|dbj|BAD60916.1| molting fluid carboxypeptidase A [Bombyx mori]	1.329	Up	0.0358	43.859
Molecular Function	GO:0016787	3	hydrolase activity	2.43586e-05	Unigene18202_All	160 1980 minus strand PREDICTED: beta-galactosidase-like [Acyrthosiphon pisum]	1.340	Up	0.0184	68.82
Molecular Function	GO:0016787	3	hydrolase activity	2.43586e-05	Unigene3411_All	2 721 minus strand trypsin precursor LlSgP4 [Lygus lineolaris]	1.703	Up	0.00225	26.811
Molecular Function	GO:0016787	3	hydrolase activity	2.43586e-05	CL3794.Contig2_All	76 906 trypsin precursor LlGtP1 [Lygus lineolaris]	1.572	Up	0.023	30.773
Molecular Function	GO:0016787	3	hydrolase activity	2.43586e-05	Unigene14708_All	4 1056 minus strand PREDICTED: prostatic acid phosphatase-like [Apis mellifera]	1.346	Up	0.0166	40.408
Molecular Function	GO:0016787	3	hydrolase activity	2.43586e-05	Unigene2287_All	128 1234 Protein phosphatase methylesterase 1 [Harpegnathos saltator]	1.258	Up	0.00337	40.839
Molecular Function	GO:0016787	3	hydrolase activity	2.43586e-05	CL2683.Contig1_All	3 557 minus strand serine protease [Laccotrephes japonensis]	1.575	Up	0.00338	20.491
Molecular Function	GO:0016787	3	hydrolase activity	2.43586e-05	CL1296.Contig1_All	69 848 trypsin precursor LlSgP4 [Lygus lineolaris]	1.682	Up	0.0299	28.698
Molecular Function	GO:0016787	3	hydrolase activity	2.43586e-05	Unigene14038_All	126 1337 tick legumain [Haemaphysalis longicornis]	1.483	Up	0.0138	45.682
Molecular Function	GO:0016787	3	hydrolase activity	2.43586e-05	Unigene33361_All	1 240 minus strand PREDICTED: similar to synaptojanin [Tribolium castaneum]	1.262	Up	0.0429	8.9661
Molecular Function	GO:0016787	3	hydrolase activity	2.43586e-05	Unigene2153_All	3 2522 minus strand PREDICTED: neither inactivation nor afterpotential protein C [Nasonia vitripennis]	1.594	Up	2.09e-05	97.239
Molecular Function	GO:0016787	3	hydrolase activity	2.43586e-05	CL184.Contig3_All	103 984 minus strand secreted salivary trypsin [Triatoma matogrossensis]	2.021	Up	0.0175	32.214
Molecular Function	GO:0016787	3	hydrolase activity	2.43586e-05	CL3835.Contig1_All	87 2759 minus strand PREDICTED: similar to protease m1 zinc metalloprotease [Tribolium castaneum]	2.202	Up	0.0312	103.68
Molecular Function	GO:0016787	3	hydrolase activity	2.43586e-05	CL1177.Contig2_All	60 578 minus strand PREDICTED: similar to Phosphatidylinositol-specific phospholipase C X domain-containing protein 2 (PI-PLC X domain-containing protein 2) [Ciona intestinalis]	1.669	Up	0.015	19.72
Molecular Function	GO:0016787	3	hydrolase activity	2.43586e-05	Unigene13889_All	1 714 minus strand trypsin-like protease [Ranatra unicolor]	1.330	Up	0.0424	26.457
Molecular Function	GO:0016787	3	hydrolase activity	2.43586e-05	CL4590.Contig2_All	1 852 minus strand acid phosphatase-1 [Culex quinquefasciatus] >gi|167880900|gb|EDS44283.1| acid phosphatase-1 [Culex quinquefasciatus]	1.234	Up	0.0149	33.112
Molecular Function	GO:0016787	3	hydrolase activity	2.43586e-05	Unigene16828_All	12 1808 PREDICTED: similar to fatty acid synthase [Tribolium castaneum]	1.555	Up	0.0207	65.315
Molecular Function	GO:0016787	3	hydrolase activity	2.43586e-05	Unigene18171_All	96 1094 minus strand cathepsin b [Aedes aegypti] >gi|54289254|gb|AAV31917.1| lysosomal cathepsin B [Aedes aegypti] >gi|108874249|gb|EAT38474.1| cathepsin b [Aedes aegypti]	1.594	Up	0.0212	36.55
Molecular Function	GO:0016787	3	hydrolase activity	2.43586e-05	Unigene9896_All	240 1625 PREDICTED: similar to thymus-specific serine protease [Tribolium castaneum]	1.296	Up	0.0293	52.646
Molecular Function	GO:0016787	3	hydrolase activity	2.43586e-05	Unigene10407_All	202 387 minus strand GH14281 [Drosophila grimshawi] >gi|193892526|gb|EDV91392.1| GH14281 [Drosophila grimshawi]	1.422	Up	0.0428	6.7216
Molecular Function	GO:0016787	3	hydrolase activity	2.43586e-05	Unigene7928_All	69 893 minus strand Inositol monophosphatase [Camponotus floridanus]	1.292	Up	0.0305	30.38
Molecular Function	GO:0016787	3	hydrolase activity	2.43586e-05	Unigene1576_All	70 774 novel protein [Danio rerio]	1.370	Up	0.0107	25.922
Molecular Function	GO:0016787	3	hydrolase activity	2.43586e-05	Unigene9720_All	1 351 trypsin precursor LlGtP1 [Lygus lineolaris]	1.314	Up	0.00295	12.677
Molecular Function	GO:0016787	3	hydrolase activity	2.43586e-05	CL3674.Contig2_All	79 1200 minus strand PREDICTED: serine proteinase stubble [Apis mellifera]	1.249	Up	0.0176	41.28
Molecular Function	GO:0016787	3	hydrolase activity	2.43586e-05	Unigene6392_All	182 3181 minus strand sarco(endo)plasmic reticulum-type calcium ATPase [Heliothis virescens]	1.204	Up	0.00348	109.38
Molecular Function	GO:0016787	3	hydrolase activity	2.43586e-05	CL1553.Contig1_All	3 725 trypsin precursor LlSgP4 [Lygus lineolaris]	1.437	Up	0.0179	26.551
Molecular Function	GO:0016787	3	hydrolase activity	2.43586e-05	CL880.Contig1_All	190 1272 minus strand PREDICTED: adenosylhomocysteinase A-like [Anolis carolinensis]	1.207	Up	0.0257	39.899
Molecular Function	GO:0016787	3	hydrolase activity	2.43586e-05	CL3836.Contig3_All	105 1325 PREDICTED: venom serine carboxypeptidase-like [Bombus terrestris]	5.307	Up	4.49e-05	46.684
Molecular Function	GO:0016787	3	hydrolase activity	2.43586e-05	CL2568.Contig2_All	95 1120 minus strand serine proteinase [Rhodnius prolixus]	1.684	Up	0.0286	36.881
Molecular Function	GO:0016787	3	hydrolase activity	2.43586e-05	Unigene18191_All	60 1661 minus strand GI13501 [Drosophila mojavensis] >gi|193920062|gb|EDW18929.1| GI13501 [Drosophila mojavensis]	1.482	Up	0.0388	60.896
Molecular Function	GO:0016787	3	hydrolase activity	2.43586e-05	Unigene2476_All	9 2690 minus strand Neurotrypsin [Camponotus floridanus]	1.279	Up	0.00891	98.5
Molecular Function	GO:0020037	5	heme binding	0.000869483	Unigene20815_All	120 434 minus strand GH11376 [Drosophila grimshawi] >gi|193904829|gb|EDW03696.1| GH11376 [Drosophila grimshawi]	1.210	Up	0.000666	11.752
Molecular Function	GO:0020037	5	heme binding	0.000869483	Unigene14700_All	93 1583 minus strand cytochrome P450 CYP6AX1 protein [Nilaparvata lugens]	1.972	Up	0.0102	57.202
Molecular Function	GO:0020037	5	heme binding	0.000869483	CL3790.Contig1_All	2 1237 minus strand cytochrome P450 [Aedes aegypti] >gi|108874803|gb|EAT39028.1| cytochrome P450 [Aedes aegypti]	1.263	Up	0.032	48.455
Molecular Function	GO:0020037	5	heme binding	0.000869483	CL2752.Contig2_All	63 1547 cytochrome P450 monooxygenase CYP6X1v1 [Lygus lineolaris]	2.892	Up	0.00105	57.102
Molecular Function	GO:0020037	5	heme binding	0.000869483	CL3702.Contig1_All	256 1623 minus strand PREDICTED: similar to cytochrome P450 [Tribolium castaneum]	1.682	Up	3.1e-05	52.65
Molecular Function	GO:0020037	5	heme binding	0.000869483	Unigene12673_All	106 1587 minus strand cytochrome P450 monooxygenase CYP6X1v1 [Lygus lineolaris]	1.513	Up	0.00988	57.101
Molecular Function	GO:0020037	5	heme binding	0.000869483	Unigene20257_All	241 1761 minus strand cytochrome P450 CYP6AX1 protein [Nilaparvata lugens]	1.462	Up	9.49e-05	58.215
Molecular Function	GO:0020037	5	heme binding	0.000869483	CL1079.Contig2_All	235 1698 cytochrome P450 [Hodotermopsis sjoestedti]	1.360	Up	0.00777	55.722
Molecular Function	GO:0020037	5	heme binding	0.000869483	CL4370.Contig2_All	40 1515 minus strand cytochrome P450 monooxygenase CYP6X1v1 [Lygus lineolaris]	1.896	Up	0.0375	56.987
Molecular Function	GO:0020037	5	heme binding	0.000869483	CL1830.Contig1_All	165 1670 cytochrome P450 monooxygenase CYP6X1v1 [Lygus lineolaris]	1.304	Up	0.0186	58.03
Molecular Function	GO:0020037	5	heme binding	0.000869483	CL1001.Contig1_All	127 1665 cytochrome P450 4A6 [Culex quinquefasciatus] >gi|167881331|gb|EDS44714.1| cytochrome P450 4A6 [Culex quinquefasciatus]	1.324	Up	0.00721	59.313
Molecular Function	GO:0020037	5	heme binding	0.000869483	Unigene8711_All	78 1565 minus strand cytochrome P450 [Nilaparvata lugens]	3.474	Up	0.0104	56.837
Molecular Function	GO:0020037	5	heme binding	0.000869483	Unigene3595_All	57 1514 minus strand PREDICTED: probable cytochrome P450 305a1-like [Bombus terrestris]	2.505	Up	0.0022	55.754
Molecular Function	GO:0004180	7	carboxypeptidase activity	0.0425612	Unigene5688_All	195 1283 Carboxypeptidase B [Camponotus floridanus]	2.957	Up	7.5e-05	41.14
Molecular Function	GO:0004180	7	carboxypeptidase activity	0.0425612	CL3836.Contig3_All	105 1325 PREDICTED: venom serine carboxypeptidase-like [Bombus terrestris]	5.307	Up	4.49e-05	46.684
Molecular Function	GO:0004180	7	carboxypeptidase activity	0.0425612	CL3836.Contig1_All	111 1340 minus strand PREDICTED: venom serine carboxypeptidase-like [Bombus terrestris]	4.260	Up	0.000847	46.988
Molecular Function	GO:0004180	7	carboxypeptidase activity	0.0425612	Unigene14000_All	69 1217 minus strand molting fluid carboxypeptidase A precursor [Bombyx mori] >gi|54114893|dbj|BAD60916.1| molting fluid carboxypeptidase A [Bombyx mori]	1.329	Up	0.0358	43.859
Molecular Function	GO:0003993	7	acid phosphatase activity	0.509121	Unigene14708_All	4 1056 minus strand PREDICTED: prostatic acid phosphatase-like [Apis mellifera]	1.346	Up	0.0166	40.408
Molecular Function	GO:0003993	7	acid phosphatase activity	0.509121	CL4590.Contig2_All	1 852 minus strand acid phosphatase-1 [Culex quinquefasciatus] >gi|167880900|gb|EDS44283.1| acid phosphatase-1 [Culex quinquefasciatus]	1.234	Up	0.0149	33.112
Molecular Function	GO:0048037	3	cofactor binding	0.0139472	CL2426.Contig2_All	1 1044 PREDICTED: similar to aromatic amino acid decarboxylase [Tribolium castaneum]	1.660	Up	0.00998	39.698
Molecular Function	GO:0048037	3	cofactor binding	0.0139472	CL750.Contig1_All	387 1769 minus strand PREDICTED: similar to 4-aminobutyrate aminotransferase [Tribolium castaneum]	1.518	Up	0.000565	51.43
Molecular Function	GO:0048037	3	cofactor binding	0.0139472	Unigene3580_All	77 1495 minus strand kynurenine aminotransferase [Glossina morsitans morsitans]	1.320	Up	0.00231	53.372
Molecular Function	GO:0048037	3	cofactor binding	0.0139472	CL1219.Contig2_All	86 1087 minus strand PREDICTED: similar to molybdopterin cofactor sulfurase (mosc) [Tribolium castaneum]	1.385	Up	0.00195	38.328
Molecular Function	GO:0048037	3	cofactor binding	0.0139472	Unigene1599_All	"48 1271 PREDICTED: isovaleryl-CoA dehydrogenase, mitochondrial-like [Bombus impatiens]"	1.336	Up	0.0295	44.821
Molecular Function	GO:0048037	3	cofactor binding	0.0139472	Unigene4441_All	116 694 minus strand PREDICTED: protein CREG2-like [Acyrthosiphon pisum]	2.464	Up	0.000983	21.845
Molecular Function	GO:0048037	3	cofactor binding	0.0139472	CL2400.Contig1_All	276 1712 minus strand PREDICTED: alanine aminotransferase 2-like [Acyrthosiphon pisum]	1.236	Up	0.0202	53.876
Molecular Function	GO:0048037	3	cofactor binding	0.0139472	Unigene6523_All	2 715 minus strand alanine-glyoxylate aminotransferase [Aedes aegypti] >gi|108884056|gb|EAT48281.1| alanine-glyoxylate aminotransferase [Aedes aegypti]	1.520	Up	0.00318	25.851
Molecular Function	GO:0048037	3	cofactor binding	0.0139472	Unigene2139_All	163 2151 minus strand PREDICTED: similar to acyl-CoA oxidase [Tribolium castaneum]	1.235	Up	0.0186	75.236
Molecular Function	GO:0048037	3	cofactor binding	0.0139472	Unigene32494_All	"1 225 RecName: Full=Nitric oxide synthase, salivary gland; Short=NOS >gi|1418270|gb|AAB03810.1| nitric oxide synthase [Rhodnius prolixus]"	1.719	Up	0.0297	7.9257
Molecular Function	GO:0048037	3	cofactor binding	0.0139472	Unigene2236_All	208 1902 PREDICTED: glucose dehydrogenase [acceptor]-like isoform 1 [Acyrthosiphon pisum] >gi|328705616|ref|XP_003242858.1| PREDICTED: glucose dehydrogenase [acceptor]-like isoform 2 [Acyrthosiphon pisum]	1.386	Up	0.0329	62.685
Molecular Function	GO:0048037	3	cofactor binding	0.0139472	Unigene4424_All	192 1826 3-hydroxyisobutyrate dehydrogenase [Aedes aegypti] >gi|108877486|gb|EAT41711.1| 3-hydroxyisobutyrate dehydrogenase [Aedes aegypti]	1.219	Up	0.0184	59.562
Molecular Function	GO:0048037	3	cofactor binding	0.0139472	Unigene18659_All	101 364 minus strand GA21218 [Drosophila pseudoobscura pseudoobscura] >gi|54642090|gb|EAL30839.1| GA21218 [Drosophila pseudoobscura pseudoobscura]	1.240	Up	0.0169	9.9703
Molecular Function	GO:0048037	3	cofactor binding	0.0139472	CL880.Contig1_All	190 1272 minus strand PREDICTED: adenosylhomocysteinase A-like [Anolis carolinensis]	1.207	Up	0.0257	39.899
Molecular Function	GO:0048037	3	cofactor binding	0.0139472	CL3352.Contig3_All	283 2016 minus strand Glucose dehydrogenase [acceptor] [Harpegnathos saltator]	2.064	Up	0.02	63.667
Molecular Function	GO:0004252	7	serine-type endopeptidase activity	1.80036e-09	Unigene1559_All	93 848 minus strand salivary trypsin [Triatoma matogrossensis]	1.469	Up	0.00676	28.054
Molecular Function	GO:0004252	7	serine-type endopeptidase activity	1.80036e-09	Unigene10388_All	2 361 minus strand PREDICTED: venom serine protease 34 [Apis mellifera]	1.390	Up	0.0454	13.046
Molecular Function	GO:0004252	7	serine-type endopeptidase activity	1.80036e-09	Unigene18009_All	1 708 minus strand trypsin precursor LlGtP1 [Lygus lineolaris]	1.605	Up	0.0142	26.422
Molecular Function	GO:0004252	7	serine-type endopeptidase activity	1.80036e-09	Unigene3411_All	2 721 minus strand trypsin precursor LlSgP4 [Lygus lineolaris]	1.703	Up	0.00225	26.811
Molecular Function	GO:0004252	7	serine-type endopeptidase activity	1.80036e-09	CL3794.Contig2_All	76 906 trypsin precursor LlGtP1 [Lygus lineolaris]	1.572	Up	0.023	30.773
Molecular Function	GO:0004252	7	serine-type endopeptidase activity	1.80036e-09	Unigene13874_All	1 726 trypsin precursor LlSgP4 [Lygus lineolaris]	1.530	Up	0.00491	26.801
Molecular Function	GO:0004252	7	serine-type endopeptidase activity	1.80036e-09	Unigene1577_All	53 862 minus strand trypsin precursor LlSgP3 [Lygus lineolaris]	1.651	Up	0.0492	29.989
Molecular Function	GO:0004252	7	serine-type endopeptidase activity	1.80036e-09	CL1236.Contig2_All	26 334 salivary trypsin [Triatoma infestans]	1.451	Up	0.0132	11.226
Molecular Function	GO:0004252	7	serine-type endopeptidase activity	1.80036e-09	CL2683.Contig1_All	3 557 minus strand serine protease [Laccotrephes japonensis]	1.575	Up	0.00338	20.491
Molecular Function	GO:0004252	7	serine-type endopeptidase activity	1.80036e-09	CL1296.Contig1_All	69 848 trypsin precursor LlSgP4 [Lygus lineolaris]	1.682	Up	0.0299	28.698
Molecular Function	GO:0004252	7	serine-type endopeptidase activity	1.80036e-09	CL184.Contig3_All	103 984 minus strand secreted salivary trypsin [Triatoma matogrossensis]	2.021	Up	0.0175	32.214
Molecular Function	GO:0004252	7	serine-type endopeptidase activity	1.80036e-09	Unigene13889_All	1 714 minus strand trypsin-like protease [Ranatra unicolor]	1.330	Up	0.0424	26.457
Molecular Function	GO:0004252	7	serine-type endopeptidase activity	1.80036e-09	CL515.Contig1_All	5 706 minus strand trypsin precursor LlSgP3 [Lygus lineolaris]	1.681	Up	0.0214	25.644
Molecular Function	GO:0004252	7	serine-type endopeptidase activity	1.80036e-09	CL1296.Contig3_All	111 866 trypsin precursor LlSgP4 [Lygus lineolaris]	1.754	Up	0.0419	27.783
Molecular Function	GO:0004252	7	serine-type endopeptidase activity	1.80036e-09	Unigene18257_All	90 848 minus strand trypsin-like protease [Ranatra unicolor]	1.656	Up	0.0351	28.034
Molecular Function	GO:0004252	7	serine-type endopeptidase activity	1.80036e-09	Unigene10407_All	202 387 minus strand GH14281 [Drosophila grimshawi] >gi|193892526|gb|EDV91392.1| GH14281 [Drosophila grimshawi]	1.422	Up	0.0428	6.7216
Molecular Function	GO:0004252	7	serine-type endopeptidase activity	1.80036e-09	Unigene9720_All	1 351 trypsin precursor LlGtP1 [Lygus lineolaris]	1.314	Up	0.00295	12.677
Molecular Function	GO:0004252	7	serine-type endopeptidase activity	1.80036e-09	CL3674.Contig2_All	79 1200 minus strand PREDICTED: serine proteinase stubble [Apis mellifera]	1.249	Up	0.0176	41.28
Molecular Function	GO:0004252	7	serine-type endopeptidase activity	1.80036e-09	CL1553.Contig1_All	3 725 trypsin precursor LlSgP4 [Lygus lineolaris]	1.437	Up	0.0179	26.551
Molecular Function	GO:0004252	7	serine-type endopeptidase activity	1.80036e-09	Unigene2103_All	161 1036 minus strand secreted salivary trypsin [Triatoma matogrossensis]	1.650	Up	0.0126	32.091
Molecular Function	GO:0004252	7	serine-type endopeptidase activity	1.80036e-09	Unigene18721_All	2 373 minus strand trypsin precursor LlSgP4 [Lygus lineolaris]	1.758	Up	0.0116	13.846
Molecular Function	GO:0004252	7	serine-type endopeptidase activity	1.80036e-09	Unigene9788_All	127 537 Plasma kallikrein [Camponotus floridanus]	1.402	Up	0.0294	15.461
Molecular Function	GO:0004252	7	serine-type endopeptidase activity	1.80036e-09	CL2568.Contig2_All	95 1120 minus strand serine proteinase [Rhodnius prolixus]	1.684	Up	0.0286	36.881
Molecular Function	GO:0004252	7	serine-type endopeptidase activity	1.80036e-09	Unigene2476_All	9 2690 minus strand Neurotrypsin [Camponotus floridanus]	1.279	Up	0.00891	98.5
Molecular Function	GO:0017171	4	serine hydrolase activity	3.28945e-11	Unigene1559_All	93 848 minus strand salivary trypsin [Triatoma matogrossensis]	1.469	Up	0.00676	28.054
Molecular Function	GO:0017171	4	serine hydrolase activity	3.28945e-11	Unigene10388_All	2 361 minus strand PREDICTED: venom serine protease 34 [Apis mellifera]	1.390	Up	0.0454	13.046
Molecular Function	GO:0017171	4	serine hydrolase activity	3.28945e-11	Unigene18009_All	1 708 minus strand trypsin precursor LlGtP1 [Lygus lineolaris]	1.605	Up	0.0142	26.422
Molecular Function	GO:0017171	4	serine hydrolase activity	3.28945e-11	Unigene3411_All	2 721 minus strand trypsin precursor LlSgP4 [Lygus lineolaris]	1.703	Up	0.00225	26.811
Molecular Function	GO:0017171	4	serine hydrolase activity	3.28945e-11	CL3794.Contig2_All	76 906 trypsin precursor LlGtP1 [Lygus lineolaris]	1.572	Up	0.023	30.773
Molecular Function	GO:0017171	4	serine hydrolase activity	3.28945e-11	Unigene13874_All	1 726 trypsin precursor LlSgP4 [Lygus lineolaris]	1.530	Up	0.00491	26.801
Molecular Function	GO:0017171	4	serine hydrolase activity	3.28945e-11	Unigene1577_All	53 862 minus strand trypsin precursor LlSgP3 [Lygus lineolaris]	1.651	Up	0.0492	29.989
Molecular Function	GO:0017171	4	serine hydrolase activity	3.28945e-11	CL1236.Contig2_All	26 334 salivary trypsin [Triatoma infestans]	1.451	Up	0.0132	11.226
Molecular Function	GO:0017171	4	serine hydrolase activity	3.28945e-11	CL2683.Contig1_All	3 557 minus strand serine protease [Laccotrephes japonensis]	1.575	Up	0.00338	20.491
Molecular Function	GO:0017171	4	serine hydrolase activity	3.28945e-11	CL1296.Contig1_All	69 848 trypsin precursor LlSgP4 [Lygus lineolaris]	1.682	Up	0.0299	28.698
Molecular Function	GO:0017171	4	serine hydrolase activity	3.28945e-11	CL3836.Contig1_All	111 1340 minus strand PREDICTED: venom serine carboxypeptidase-like [Bombus terrestris]	4.260	Up	0.000847	46.988
Molecular Function	GO:0017171	4	serine hydrolase activity	3.28945e-11	CL184.Contig3_All	103 984 minus strand secreted salivary trypsin [Triatoma matogrossensis]	2.021	Up	0.0175	32.214
Molecular Function	GO:0017171	4	serine hydrolase activity	3.28945e-11	Unigene13889_All	1 714 minus strand trypsin-like protease [Ranatra unicolor]	1.330	Up	0.0424	26.457
Molecular Function	GO:0017171	4	serine hydrolase activity	3.28945e-11	CL515.Contig1_All	5 706 minus strand trypsin precursor LlSgP3 [Lygus lineolaris]	1.681	Up	0.0214	25.644
Molecular Function	GO:0017171	4	serine hydrolase activity	3.28945e-11	CL1296.Contig3_All	111 866 trypsin precursor LlSgP4 [Lygus lineolaris]	1.754	Up	0.0419	27.783
Molecular Function	GO:0017171	4	serine hydrolase activity	3.28945e-11	Unigene18257_All	90 848 minus strand trypsin-like protease [Ranatra unicolor]	1.656	Up	0.0351	28.034
Molecular Function	GO:0017171	4	serine hydrolase activity	3.28945e-11	Unigene9896_All	240 1625 PREDICTED: similar to thymus-specific serine protease [Tribolium castaneum]	1.296	Up	0.0293	52.646
Molecular Function	GO:0017171	4	serine hydrolase activity	3.28945e-11	Unigene10407_All	202 387 minus strand GH14281 [Drosophila grimshawi] >gi|193892526|gb|EDV91392.1| GH14281 [Drosophila grimshawi]	1.422	Up	0.0428	6.7216
Molecular Function	GO:0017171	4	serine hydrolase activity	3.28945e-11	Unigene1576_All	70 774 novel protein [Danio rerio]	1.370	Up	0.0107	25.922
Molecular Function	GO:0017171	4	serine hydrolase activity	3.28945e-11	Unigene9720_All	1 351 trypsin precursor LlGtP1 [Lygus lineolaris]	1.314	Up	0.00295	12.677
Molecular Function	GO:0017171	4	serine hydrolase activity	3.28945e-11	CL3674.Contig2_All	79 1200 minus strand PREDICTED: serine proteinase stubble [Apis mellifera]	1.249	Up	0.0176	41.28
Molecular Function	GO:0017171	4	serine hydrolase activity	3.28945e-11	CL1553.Contig1_All	3 725 trypsin precursor LlSgP4 [Lygus lineolaris]	1.437	Up	0.0179	26.551
Molecular Function	GO:0017171	4	serine hydrolase activity	3.28945e-11	Unigene2103_All	161 1036 minus strand secreted salivary trypsin [Triatoma matogrossensis]	1.650	Up	0.0126	32.091
Molecular Function	GO:0017171	4	serine hydrolase activity	3.28945e-11	Unigene18721_All	2 373 minus strand trypsin precursor LlSgP4 [Lygus lineolaris]	1.758	Up	0.0116	13.846
Molecular Function	GO:0017171	4	serine hydrolase activity	3.28945e-11	Unigene9788_All	127 537 Plasma kallikrein [Camponotus floridanus]	1.402	Up	0.0294	15.461
Molecular Function	GO:0017171	4	serine hydrolase activity	3.28945e-11	CL3836.Contig3_All	105 1325 PREDICTED: venom serine carboxypeptidase-like [Bombus terrestris]	5.307	Up	4.49e-05	46.684
Molecular Function	GO:0017171	4	serine hydrolase activity	3.28945e-11	CL2568.Contig2_All	95 1120 minus strand serine proteinase [Rhodnius prolixus]	1.684	Up	0.0286	36.881
Molecular Function	GO:0017171	4	serine hydrolase activity	3.28945e-11	Unigene2476_All	9 2690 minus strand Neurotrypsin [Camponotus floridanus]	1.279	Up	0.00891	98.5
Biological Process	GO:0018342	8	protein prenylation	0.268246	Unigene10007_All	72 1046 minus strand Protein farnesyltransferase/geranylgeranyltransferase type-1 subunit alpha [Harpegnathos saltator]	1.299	Up	0.00355	38.503
Biological Process	GO:0018342	8	protein prenylation	0.268246	Unigene7753_All	264 1391 minus strand farnesyltransferase beta subunit [Danaus plexippus]	1.347	Up	0.0194	42.744
Biological Process	GO:0030001	7	metal ion transport	0.320789	Unigene6392_All	182 3181 minus strand sarco(endo)plasmic reticulum-type calcium ATPase [Heliothis virescens]	1.204	Up	0.00348	109.38
Biological Process	GO:0030001	7	metal ion transport	0.320789	Unigene7780_All	8 961 minus strand Sodium/potassium-transporting ATPase subunit beta-2 [Camponotus floridanus]	1.365	Up	0.00739	36.841
Biological Process	GO:0030001	7	metal ion transport	0.320789	Unigene16080_All	204 1130 GH10786 [Drosophila grimshawi] >gi|193904032|gb|EDW02899.1| GH10786 [Drosophila grimshawi]	1.266	Up	0.00398	35.938
Biological Process	GO:0034655	6	nucleobase-containing compound catabolic process	0.695983	Unigene10540_All	49 1608 79 kDa salivary apyrase precursor [Triatoma infestans]	1.353	Up	0.0176	57.061
Biological Process	GO:0034655	6	nucleobase-containing compound catabolic process	0.695983	CL880.Contig1_All	190 1272 minus strand PREDICTED: adenosylhomocysteinase A-like [Anolis carolinensis]	1.207	Up	0.0257	39.899
Biological Process	GO:0006030	7	chitin metabolic process	0.106046	Unigene14133_All	37 726 cuticular protein analogous to peritrophins 3-A1 precursor [Tribolium castaneum] >gi|268309018|gb|ACY95475.1| cuticular protein analogous to peritrophins 3-A1 [Tribolium castaneum]	2.137	Up	0.0162	25.705
Biological Process	GO:0006030	7	chitin metabolic process	0.106046	Unigene20356_All	32 805 minus strand cuticular protein analogous to peritrophins 3-C5 isoform 1 precursor [Tribolium castaneum] >gi|119387888|gb|ABL73929.1| obstractor C1 [Tribolium castaneum]	1.945	Up	0.0291	28.486
Biological Process	GO:0006030	7	chitin metabolic process	0.106046	Unigene4928_All	133 339 minus strand cuticular protein analogous to peritrophins 3-A2 precursor [Tribolium castaneum] >gi|268309020|gb|ACY95476.1| cuticular protein analogous to peritrophins 3-A2 [Tribolium castaneum]	2.334	Up	0.0271	7.4783
Biological Process	GO:0006030	7	chitin metabolic process	0.106046	Unigene20314_All	82 735 minus strand cuticular protein analogous to peritrophins 3-D1 [Danaus plexippus]	1.222	Up	0.00866	23.908
Biological Process	GO:0006030	7	chitin metabolic process	0.106046	Unigene3696_All	108 797 minus strand cuticular protein analogous to peritrophins 3-B precursor [Acyrthosiphon pisum]	1.551	Up	0.0287	26.381
Biological Process	GO:0006030	7	chitin metabolic process	0.106046	Unigene18191_All	60 1661 minus strand GI13501 [Drosophila mojavensis] >gi|193920062|gb|EDW18929.1| GI13501 [Drosophila mojavensis]	1.482	Up	0.0388	60.896
Biological Process	GO:0055114	4	oxidation-reduction process	0.00510449	Unigene14958_All	206 616 Cu/Zn superoxide dismutase [Cavia porcellus]	1.323	Up	0.0123	14.147
Biological Process	GO:0055114	4	oxidation-reduction process	0.00510449	Unigene14700_All	93 1583 minus strand cytochrome P450 CYP6AX1 protein [Nilaparvata lugens]	1.972	Up	0.0102	57.202
Biological Process	GO:0055114	4	oxidation-reduction process	0.00510449	CL2752.Contig2_All	63 1547 cytochrome P450 monooxygenase CYP6X1v1 [Lygus lineolaris]	2.892	Up	0.00105	57.102
Biological Process	GO:0055114	4	oxidation-reduction process	0.00510449	CL3383.Contig3_All	152 1546 minus strand PREDICTED: peroxisomal N(1)-acetyl-spermine/spermidine oxidase-like [Bombus terrestris]	1.592	Up	0.00239	52.216
Biological Process	GO:0055114	4	oxidation-reduction process	0.00510449	Unigene17115_All	204 1901 minus strand PREDICTED: similar to pyrroline-5-carboxylate dehydrogenase [Tribolium castaneum]	1.216	Up	0.00739	62.781
Biological Process	GO:0055114	4	oxidation-reduction process	0.00510449	Unigene2139_All	163 2151 minus strand PREDICTED: similar to acyl-CoA oxidase [Tribolium castaneum]	1.235	Up	0.0186	75.236
Biological Process	GO:0055114	4	oxidation-reduction process	0.00510449	Unigene12673_All	106 1587 minus strand cytochrome P450 monooxygenase CYP6X1v1 [Lygus lineolaris]	1.513	Up	0.00988	57.101
Biological Process	GO:0055114	4	oxidation-reduction process	0.00510449	Unigene20257_All	241 1761 minus strand cytochrome P450 CYP6AX1 protein [Nilaparvata lugens]	1.462	Up	9.49e-05	58.215
Biological Process	GO:0055114	4	oxidation-reduction process	0.00510449	Unigene10742_All	23 832 Glucose dehydrogenase [acceptor] [Harpegnathos saltator]	1.300	Up	0.0155	30.221
Biological Process	GO:0055114	4	oxidation-reduction process	0.00510449	CL1001.Contig1_All	127 1665 cytochrome P450 4A6 [Culex quinquefasciatus] >gi|167881331|gb|EDS44714.1| cytochrome P450 4A6 [Culex quinquefasciatus]	1.324	Up	0.00721	59.313
Biological Process	GO:0055114	4	oxidation-reduction process	0.00510449	Unigene3595_All	57 1514 minus strand PREDICTED: probable cytochrome P450 305a1-like [Bombus terrestris]	2.505	Up	0.0022	55.754
Biological Process	GO:0055114	4	oxidation-reduction process	0.00510449	CL3965.Contig2_All	136 1092 minus strand PREDICTED: alcohol dehydrogenase [NADP+] A-like [Apis mellifera]	1.240	Up	0.0393	36.218
Biological Process	GO:0055114	4	oxidation-reduction process	0.00510449	Unigene8465_All	23 1945 minus strand PREDICTED: aldehyde oxidase-like [Bombus terrestris]	1.583	Up	0.00291	71.07
Biological Process	GO:0055114	4	oxidation-reduction process	0.00510449	Unigene9980_All	96 1034 minus strand PREDICTED: similar to CG6084 CG6084-PA [Tribolium castaneum]	1.308	Up	0.00448	35.758
Biological Process	GO:0055114	4	oxidation-reduction process	0.00510449	Unigene16828_All	12 1808 PREDICTED: similar to fatty acid synthase [Tribolium castaneum]	1.555	Up	0.0207	65.315
Biological Process	GO:0055114	4	oxidation-reduction process	0.00510449	Unigene1599_All	"48 1271 PREDICTED: isovaleryl-CoA dehydrogenase, mitochondrial-like [Bombus impatiens]"	1.336	Up	0.0295	44.821
Biological Process	GO:0055114	4	oxidation-reduction process	0.00510449	CL3790.Contig1_All	2 1237 minus strand cytochrome P450 [Aedes aegypti] >gi|108874803|gb|EAT39028.1| cytochrome P450 [Aedes aegypti]	1.263	Up	0.032	48.455
Biological Process	GO:0055114	4	oxidation-reduction process	0.00510449	Unigene4441_All	116 694 minus strand PREDICTED: protein CREG2-like [Acyrthosiphon pisum]	2.464	Up	0.000983	21.845
Biological Process	GO:0055114	4	oxidation-reduction process	0.00510449	CL1777.Contig1_All	10 630 minus strand 15-hydroxyprostaglandin dehydrogenase [NAD+] [Camponotus floridanus]	1.454	Up	0.0337	23.075
Biological Process	GO:0055114	4	oxidation-reduction process	0.00510449	Unigene18282_All	400 1320 PREDICTED: similar to CG6084 CG6084-PA [Tribolium castaneum]	1.300	Up	0.00649	34.703
Biological Process	GO:0055114	4	oxidation-reduction process	0.00510449	Unigene7813_All	"145 1785 minus strand PREDICTED: glutamate dehydrogenase, mitochondrial-like [Acyrthosiphon pisum]"	1.593	Up	1.42e-05	60.613
Biological Process	GO:0055114	4	oxidation-reduction process	0.00510449	CL3702.Contig1_All	256 1623 minus strand PREDICTED: similar to cytochrome P450 [Tribolium castaneum]	1.682	Up	3.1e-05	52.65
Biological Process	GO:0055114	4	oxidation-reduction process	0.00510449	Unigene1515_All	49 1545 minus strand GH13324 [Drosophila grimshawi] >gi|193900077|gb|EDV98943.1| GH13324 [Drosophila grimshawi]	1.720	Up	0.0044	55.04
Biological Process	GO:0055114	4	oxidation-reduction process	0.00510449	Unigene2236_All	208 1902 PREDICTED: glucose dehydrogenase [acceptor]-like isoform 1 [Acyrthosiphon pisum] >gi|328705616|ref|XP_003242858.1| PREDICTED: glucose dehydrogenase [acceptor]-like isoform 2 [Acyrthosiphon pisum]	1.386	Up	0.0329	62.685
Biological Process	GO:0055114	4	oxidation-reduction process	0.00510449	Unigene4424_All	192 1826 3-hydroxyisobutyrate dehydrogenase [Aedes aegypti] >gi|108877486|gb|EAT41711.1| 3-hydroxyisobutyrate dehydrogenase [Aedes aegypti]	1.219	Up	0.0184	59.562
Biological Process	GO:0055114	4	oxidation-reduction process	0.00510449	CL1079.Contig2_All	235 1698 cytochrome P450 [Hodotermopsis sjoestedti]	1.360	Up	0.00777	55.722
Biological Process	GO:0055114	4	oxidation-reduction process	0.00510449	CL4370.Contig2_All	40 1515 minus strand cytochrome P450 monooxygenase CYP6X1v1 [Lygus lineolaris]	1.896	Up	0.0375	56.987
Biological Process	GO:0055114	4	oxidation-reduction process	0.00510449	CL1830.Contig1_All	165 1670 cytochrome P450 monooxygenase CYP6X1v1 [Lygus lineolaris]	1.304	Up	0.0186	58.03
Biological Process	GO:0055114	4	oxidation-reduction process	0.00510449	CL3352.Contig3_All	283 2016 minus strand Glucose dehydrogenase [acceptor] [Harpegnathos saltator]	2.064	Up	0.02	63.667
Biological Process	GO:0055114	4	oxidation-reduction process	0.00510449	CL1917.Contig1_All	223 1527 FAD-dependent oxidoreductase domain-containing protein 1 [Camponotus floridanus]	1.427	Up	0.0151	48.359
Biological Process	GO:0055114	4	oxidation-reduction process	0.00510449	Unigene8711_All	78 1565 minus strand cytochrome P450 [Nilaparvata lugens]	3.474	Up	0.0104	56.837
Biological Process	GO:1901071	6	glucosamine-containing compound metabolic process	0.114471	Unigene14133_All	37 726 cuticular protein analogous to peritrophins 3-A1 precursor [Tribolium castaneum] >gi|268309018|gb|ACY95475.1| cuticular protein analogous to peritrophins 3-A1 [Tribolium castaneum]	2.137	Up	0.0162	25.705
Biological Process	GO:1901071	6	glucosamine-containing compound metabolic process	0.114471	Unigene20356_All	32 805 minus strand cuticular protein analogous to peritrophins 3-C5 isoform 1 precursor [Tribolium castaneum] >gi|119387888|gb|ABL73929.1| obstractor C1 [Tribolium castaneum]	1.945	Up	0.0291	28.486
Biological Process	GO:1901071	6	glucosamine-containing compound metabolic process	0.114471	Unigene4928_All	133 339 minus strand cuticular protein analogous to peritrophins 3-A2 precursor [Tribolium castaneum] >gi|268309020|gb|ACY95476.1| cuticular protein analogous to peritrophins 3-A2 [Tribolium castaneum]	2.334	Up	0.0271	7.4783
Biological Process	GO:1901071	6	glucosamine-containing compound metabolic process	0.114471	Unigene20314_All	82 735 minus strand cuticular protein analogous to peritrophins 3-D1 [Danaus plexippus]	1.222	Up	0.00866	23.908
Biological Process	GO:1901071	6	glucosamine-containing compound metabolic process	0.114471	Unigene3696_All	108 797 minus strand cuticular protein analogous to peritrophins 3-B precursor [Acyrthosiphon pisum]	1.551	Up	0.0287	26.381
Biological Process	GO:1901071	6	glucosamine-containing compound metabolic process	0.114471	Unigene18191_All	60 1661 minus strand GI13501 [Drosophila mojavensis] >gi|193920062|gb|EDW18929.1| GI13501 [Drosophila mojavensis]	1.482	Up	0.0388	60.896
Biological Process	GO:0046434	6	organophosphate catabolic process	0.354312	Unigene10540_All	49 1608 79 kDa salivary apyrase precursor [Triatoma infestans]	1.353	Up	0.0176	57.061
Biological Process	GO:0046434	6	organophosphate catabolic process	0.354312	Unigene7928_All	69 893 minus strand Inositol monophosphatase [Camponotus floridanus]	1.292	Up	0.0305	30.38
Biological Process	GO:0097354	4	prenylation	0.268246	Unigene10007_All	72 1046 minus strand Protein farnesyltransferase/geranylgeranyltransferase type-1 subunit alpha [Harpegnathos saltator]	1.299	Up	0.00355	38.503
Biological Process	GO:0097354	4	prenylation	0.268246	Unigene7753_All	264 1391 minus strand farnesyltransferase beta subunit [Danaus plexippus]	1.347	Up	0.0194	42.744
Biological Process	GO:0006040	5	amino sugar metabolic process	0.114471	Unigene14133_All	37 726 cuticular protein analogous to peritrophins 3-A1 precursor [Tribolium castaneum] >gi|268309018|gb|ACY95475.1| cuticular protein analogous to peritrophins 3-A1 [Tribolium castaneum]	2.137	Up	0.0162	25.705
Biological Process	GO:0006040	5	amino sugar metabolic process	0.114471	Unigene20356_All	32 805 minus strand cuticular protein analogous to peritrophins 3-C5 isoform 1 precursor [Tribolium castaneum] >gi|119387888|gb|ABL73929.1| obstractor C1 [Tribolium castaneum]	1.945	Up	0.0291	28.486
Biological Process	GO:0006040	5	amino sugar metabolic process	0.114471	Unigene4928_All	133 339 minus strand cuticular protein analogous to peritrophins 3-A2 precursor [Tribolium castaneum] >gi|268309020|gb|ACY95476.1| cuticular protein analogous to peritrophins 3-A2 [Tribolium castaneum]	2.334	Up	0.0271	7.4783
Biological Process	GO:0006040	5	amino sugar metabolic process	0.114471	Unigene20314_All	82 735 minus strand cuticular protein analogous to peritrophins 3-D1 [Danaus plexippus]	1.222	Up	0.00866	23.908
Biological Process	GO:0006040	5	amino sugar metabolic process	0.114471	Unigene3696_All	108 797 minus strand cuticular protein analogous to peritrophins 3-B precursor [Acyrthosiphon pisum]	1.551	Up	0.0287	26.381
Biological Process	GO:0006040	5	amino sugar metabolic process	0.114471	Unigene18191_All	60 1661 minus strand GI13501 [Drosophila mojavensis] >gi|193920062|gb|EDW18929.1| GI13501 [Drosophila mojavensis]	1.482	Up	0.0388	60.896
Biological Process	GO:0030258	6	lipid modification	0.527998	Unigene2139_All	163 2151 minus strand PREDICTED: similar to acyl-CoA oxidase [Tribolium castaneum]	1.235	Up	0.0186	75.236
Biological Process	GO:0030258	6	lipid modification	0.527998	Unigene7928_All	69 893 minus strand Inositol monophosphatase [Camponotus floridanus]	1.292	Up	0.0305	30.38
Biological Process	GO:0032787	8	monocarboxylic acid metabolic process	0.586361	Unigene2139_All	163 2151 minus strand PREDICTED: similar to acyl-CoA oxidase [Tribolium castaneum]	1.235	Up	0.0186	75.236
Biological Process	GO:0032787	8	monocarboxylic acid metabolic process	0.586361	CL2613.Contig1_All	64 507 acyl carrier protein/NADH-ubiquinone oxidoreductase NDUFAB1/SDAP subunit [Aedes aegypti]	1.228	Up	0.00754	16.632
Biological Process	GO:0032787	8	monocarboxylic acid metabolic process	0.586361	CL750.Contig1_All	387 1769 minus strand PREDICTED: similar to 4-aminobutyrate aminotransferase [Tribolium castaneum]	1.518	Up	0.000565	51.43
Biological Process	GO:0006814	8	sodium ion transport	0.393498	Unigene7780_All	8 961 minus strand Sodium/potassium-transporting ATPase subunit beta-2 [Camponotus floridanus]	1.365	Up	0.00739	36.841
Biological Process	GO:0006814	8	sodium ion transport	0.393498	Unigene16080_All	204 1130 GH10786 [Drosophila grimshawi] >gi|193904032|gb|EDW02899.1| GH10786 [Drosophila grimshawi]	1.266	Up	0.00398	35.938
Biological Process	GO:0046395	8	carboxylic acid catabolic process	0.695983	Unigene2139_All	163 2151 minus strand PREDICTED: similar to acyl-CoA oxidase [Tribolium castaneum]	1.235	Up	0.0186	75.236
Biological Process	GO:0046395	8	carboxylic acid catabolic process	0.695983	CL880.Contig1_All	190 1272 minus strand PREDICTED: adenosylhomocysteinase A-like [Anolis carolinensis]	1.207	Up	0.0257	39.899
Biological Process	GO:0016054	6	organic acid catabolic process	0.695983	Unigene2139_All	163 2151 minus strand PREDICTED: similar to acyl-CoA oxidase [Tribolium castaneum]	1.235	Up	0.0186	75.236
Biological Process	GO:0016054	6	organic acid catabolic process	0.695983	CL880.Contig1_All	190 1272 minus strand PREDICTED: adenosylhomocysteinase A-like [Anolis carolinensis]	1.207	Up	0.0257	39.899
Biological Process	GO:0006813	8	potassium ion transport	0.430322	Unigene7780_All	8 961 minus strand Sodium/potassium-transporting ATPase subunit beta-2 [Camponotus floridanus]	1.365	Up	0.00739	36.841
Biological Process	GO:0006813	8	potassium ion transport	0.430322	Unigene16080_All	204 1130 GH10786 [Drosophila grimshawi] >gi|193904032|gb|EDW02899.1| GH10786 [Drosophila grimshawi]	1.266	Up	0.00398	35.938
Biological Process	GO:0006508	6	proteolysis	3.83828e-07	Unigene5688_All	195 1283 Carboxypeptidase B [Camponotus floridanus]	2.957	Up	7.5e-05	41.14
Biological Process	GO:0006508	6	proteolysis	3.83828e-07	Unigene16075_All	173 1174 minus strand cathepsin L-like cysteine protease 2 [Plautia stali]	1.206	Up	0.0277	37.586
Biological Process	GO:0006508	6	proteolysis	3.83828e-07	Unigene1559_All	93 848 minus strand salivary trypsin [Triatoma matogrossensis]	1.469	Up	0.00676	28.054
Biological Process	GO:0006508	6	proteolysis	3.83828e-07	Unigene10388_All	2 361 minus strand PREDICTED: venom serine protease 34 [Apis mellifera]	1.390	Up	0.0454	13.046
Biological Process	GO:0006508	6	proteolysis	3.83828e-07	Unigene18009_All	1 708 minus strand trypsin precursor LlGtP1 [Lygus lineolaris]	1.605	Up	0.0142	26.422
Biological Process	GO:0006508	6	proteolysis	3.83828e-07	CL1335.Contig2_All	123 1127 GH22826 [Drosophila grimshawi] >gi|193899288|gb|EDV98154.1| GH22826 [Drosophila grimshawi]	1.671	Up	0.0298	37.454
Biological Process	GO:0006508	6	proteolysis	3.83828e-07	Unigene13874_All	1 726 trypsin precursor LlSgP4 [Lygus lineolaris]	1.530	Up	0.00491	26.801
Biological Process	GO:0006508	6	proteolysis	3.83828e-07	Unigene1577_All	53 862 minus strand trypsin precursor LlSgP3 [Lygus lineolaris]	1.651	Up	0.0492	29.989
Biological Process	GO:0006508	6	proteolysis	3.83828e-07	CL1236.Contig2_All	26 334 salivary trypsin [Triatoma infestans]	1.451	Up	0.0132	11.226
Biological Process	GO:0006508	6	proteolysis	3.83828e-07	CL3836.Contig1_All	111 1340 minus strand PREDICTED: venom serine carboxypeptidase-like [Bombus terrestris]	4.260	Up	0.000847	46.988
Biological Process	GO:0006508	6	proteolysis	3.83828e-07	CL2959.Contig1_All	444 1703 minus strand Sentrin-specific protease 1 [Acromyrmex echinatior]	1.213	Up	0.0295	48.526
Biological Process	GO:0006508	6	proteolysis	3.83828e-07	CL515.Contig1_All	5 706 minus strand trypsin precursor LlSgP3 [Lygus lineolaris]	1.681	Up	0.0214	25.644
Biological Process	GO:0006508	6	proteolysis	3.83828e-07	CL1296.Contig3_All	111 866 trypsin precursor LlSgP4 [Lygus lineolaris]	1.754	Up	0.0419	27.783
Biological Process	GO:0006508	6	proteolysis	3.83828e-07	Unigene9867_All	110 1279 minus strand aspartate protease cathepsin D [Triatoma infestans]	1.498	Up	0.00556	42.518
Biological Process	GO:0006508	6	proteolysis	3.83828e-07	Unigene18257_All	90 848 minus strand trypsin-like protease [Ranatra unicolor]	1.656	Up	0.0351	28.034
Biological Process	GO:0006508	6	proteolysis	3.83828e-07	CL5255.Contig1_All	2 733 cathepsin L-like cysteine protease 1 [Plautia stali]	5.476	Up	0.000372	27.166
Biological Process	GO:0006508	6	proteolysis	3.83828e-07	Unigene2103_All	161 1036 minus strand secreted salivary trypsin [Triatoma matogrossensis]	1.650	Up	0.0126	32.091
Biological Process	GO:0006508	6	proteolysis	3.83828e-07	Unigene18721_All	2 373 minus strand trypsin precursor LlSgP4 [Lygus lineolaris]	1.758	Up	0.0116	13.846
Biological Process	GO:0006508	6	proteolysis	3.83828e-07	Unigene9788_All	127 537 Plasma kallikrein [Camponotus floridanus]	1.402	Up	0.0294	15.461
Biological Process	GO:0006508	6	proteolysis	3.83828e-07	Unigene14000_All	69 1217 minus strand molting fluid carboxypeptidase A precursor [Bombyx mori] >gi|54114893|dbj|BAD60916.1| molting fluid carboxypeptidase A [Bombyx mori]	1.329	Up	0.0358	43.859
Biological Process	GO:0006508	6	proteolysis	3.83828e-07	Unigene3411_All	2 721 minus strand trypsin precursor LlSgP4 [Lygus lineolaris]	1.703	Up	0.00225	26.811
Biological Process	GO:0006508	6	proteolysis	3.83828e-07	CL3794.Contig2_All	76 906 trypsin precursor LlGtP1 [Lygus lineolaris]	1.572	Up	0.023	30.773
Biological Process	GO:0006508	6	proteolysis	3.83828e-07	Unigene14038_All	126 1337 tick legumain [Haemaphysalis longicornis]	1.483	Up	0.0138	45.682
Biological Process	GO:0006508	6	proteolysis	3.83828e-07	CL1296.Contig1_All	69 848 trypsin precursor LlSgP4 [Lygus lineolaris]	1.682	Up	0.0299	28.698
Biological Process	GO:0006508	6	proteolysis	3.83828e-07	CL2683.Contig1_All	3 557 minus strand serine protease [Laccotrephes japonensis]	1.575	Up	0.00338	20.491
Biological Process	GO:0006508	6	proteolysis	3.83828e-07	CL184.Contig3_All	103 984 minus strand secreted salivary trypsin [Triatoma matogrossensis]	2.021	Up	0.0175	32.214
Biological Process	GO:0006508	6	proteolysis	3.83828e-07	Unigene13889_All	1 714 minus strand trypsin-like protease [Ranatra unicolor]	1.330	Up	0.0424	26.457
Biological Process	GO:0006508	6	proteolysis	3.83828e-07	Unigene18171_All	96 1094 minus strand cathepsin b [Aedes aegypti] >gi|54289254|gb|AAV31917.1| lysosomal cathepsin B [Aedes aegypti] >gi|108874249|gb|EAT38474.1| cathepsin b [Aedes aegypti]	1.594	Up	0.0212	36.55
Biological Process	GO:0006508	6	proteolysis	3.83828e-07	Unigene9896_All	240 1625 PREDICTED: similar to thymus-specific serine protease [Tribolium castaneum]	1.296	Up	0.0293	52.646
Biological Process	GO:0006508	6	proteolysis	3.83828e-07	Unigene10407_All	202 387 minus strand GH14281 [Drosophila grimshawi] >gi|193892526|gb|EDV91392.1| GH14281 [Drosophila grimshawi]	1.422	Up	0.0428	6.7216
Biological Process	GO:0006508	6	proteolysis	3.83828e-07	Unigene1576_All	70 774 novel protein [Danio rerio]	1.370	Up	0.0107	25.922
Biological Process	GO:0006508	6	proteolysis	3.83828e-07	Unigene9720_All	1 351 trypsin precursor LlGtP1 [Lygus lineolaris]	1.314	Up	0.00295	12.677
Biological Process	GO:0006508	6	proteolysis	3.83828e-07	CL3674.Contig2_All	79 1200 minus strand PREDICTED: serine proteinase stubble [Apis mellifera]	1.249	Up	0.0176	41.28
Biological Process	GO:0006508	6	proteolysis	3.83828e-07	CL1553.Contig1_All	3 725 trypsin precursor LlSgP4 [Lygus lineolaris]	1.437	Up	0.0179	26.551
Biological Process	GO:0006508	6	proteolysis	3.83828e-07	CL2568.Contig2_All	95 1120 minus strand serine proteinase [Rhodnius prolixus]	1.684	Up	0.0286	36.881
Biological Process	GO:0006508	6	proteolysis	3.83828e-07	CL3836.Contig3_All	105 1325 PREDICTED: venom serine carboxypeptidase-like [Bombus terrestris]	5.307	Up	4.49e-05	46.684
Biological Process	GO:0006508	6	proteolysis	3.83828e-07	Unigene2476_All	9 2690 minus strand Neurotrypsin [Camponotus floridanus]	1.279	Up	0.00891	98.5
Biological Process	GO:0006022	5	aminoglycan metabolic process	0.123208	Unigene14133_All	37 726 cuticular protein analogous to peritrophins 3-A1 precursor [Tribolium castaneum] >gi|268309018|gb|ACY95475.1| cuticular protein analogous to peritrophins 3-A1 [Tribolium castaneum]	2.137	Up	0.0162	25.705
Biological Process	GO:0006022	5	aminoglycan metabolic process	0.123208	Unigene20356_All	32 805 minus strand cuticular protein analogous to peritrophins 3-C5 isoform 1 precursor [Tribolium castaneum] >gi|119387888|gb|ABL73929.1| obstractor C1 [Tribolium castaneum]	1.945	Up	0.0291	28.486
Biological Process	GO:0006022	5	aminoglycan metabolic process	0.123208	Unigene4928_All	133 339 minus strand cuticular protein analogous to peritrophins 3-A2 precursor [Tribolium castaneum] >gi|268309020|gb|ACY95476.1| cuticular protein analogous to peritrophins 3-A2 [Tribolium castaneum]	2.334	Up	0.0271	7.4783
Biological Process	GO:0006022	5	aminoglycan metabolic process	0.123208	Unigene20314_All	82 735 minus strand cuticular protein analogous to peritrophins 3-D1 [Danaus plexippus]	1.222	Up	0.00866	23.908
Biological Process	GO:0006022	5	aminoglycan metabolic process	0.123208	Unigene3696_All	108 797 minus strand cuticular protein analogous to peritrophins 3-B precursor [Acyrthosiphon pisum]	1.551	Up	0.0287	26.381
Biological Process	GO:0006022	5	aminoglycan metabolic process	0.123208	Unigene18191_All	60 1661 minus strand GI13501 [Drosophila mojavensis] >gi|193920062|gb|EDW18929.1| GI13501 [Drosophila mojavensis]	1.482	Up	0.0388	60.896
Biological Process	GO:0044712	4	single-organism catabolic process	0.487991	Unigene2139_All	163 2151 minus strand PREDICTED: similar to acyl-CoA oxidase [Tribolium castaneum]	1.235	Up	0.0186	75.236
Biological Process	GO:0044712	4	single-organism catabolic process	0.487991	Unigene10540_All	49 1608 79 kDa salivary apyrase precursor [Triatoma infestans]	1.353	Up	0.0176	57.061
Biological Process	GO:0044712	4	single-organism catabolic process	0.487991	CL880.Contig1_All	190 1272 minus strand PREDICTED: adenosylhomocysteinase A-like [Anolis carolinensis]	1.207	Up	0.0257	39.899
Biological Process	GO:0044712	4	single-organism catabolic process	0.487991	Unigene7928_All	69 893 minus strand Inositol monophosphatase [Camponotus floridanus]	1.292	Up	0.0305	30.38
Biological Process	GO:0044282	5	small molecule catabolic process	0.452525	Unigene2139_All	163 2151 minus strand PREDICTED: similar to acyl-CoA oxidase [Tribolium castaneum]	1.235	Up	0.0186	75.236
Biological Process	GO:0044282	5	small molecule catabolic process	0.452525	CL880.Contig1_All	190 1272 minus strand PREDICTED: adenosylhomocysteinase A-like [Anolis carolinensis]	1.207	Up	0.0257	39.899
Biological Process	GO:0044282	5	small molecule catabolic process	0.452525	Unigene7928_All	69 893 minus strand Inositol monophosphatase [Camponotus floridanus]	1.292	Up	0.0305	30.38
Biological Process	GO:0006631	9	fatty acid metabolic process	0.632844	Unigene2139_All	163 2151 minus strand PREDICTED: similar to acyl-CoA oxidase [Tribolium castaneum]	1.235	Up	0.0186	75.236
Biological Process	GO:0006631	9	fatty acid metabolic process	0.632844	CL2613.Contig1_All	64 507 acyl carrier protein/NADH-ubiquinone oxidoreductase NDUFAB1/SDAP subunit [Aedes aegypti]	1.228	Up	0.00754	16.632
