# Supplementary material for: Differential Proteomics Analysis Unraveled Mechanisms of Arma chinensis Responding to Improved Artificial Diet
Source: Insects. 2022 Jul 2;13(7):605. doi: 10.3390/insects13070605 (PMC9319121; doi:10.3390/insects13070605)
Supplement: Supplementary file 1 [file insects-13-00605-s001.zip › Supplementary Table S7.xlsx]

## Sheet: Down GO2Protein
Table S7. GO enrichment for the down-regulated DEPs in IADA/COSMA.
GO Terms Level 1	GO Terms ID	GO Terms Level	GO Terms Description	Fisher's exact test P value	Protein accession	Protein description	IADA/COSMA Ratio	Regulated Type	IADA/COSMA P value	MW [kDa]
Molecular Function	GO:0004497	4	monooxygenase activity	0.312635	Unigene18209_All	76 1596 PREDICTED: probable cytochrome P450 6a14-like isoform 2 [Bombus terrestris]	0.711	Down	0.00293	58.57
Molecular Function	GO:0004497	4	monooxygenase activity	0.312635	Unigene8757_All	17 1501 cytochrome P450 26B1 [Culex quinquefasciatus] >gi|167873036|gb|EDS36419.1| cytochrome P450 26B1 [Culex quinquefasciatus]	0.774	Down	0.0128	57.271
Molecular Function	GO:0004812	6	aminoacyl-tRNA ligase activity	0.644846	Unigene33011_All	"82 528 PREDICTED: isoleucyl-tRNA synthetase, cytoplasmic [Amphimedon queenslandica]"	0.827	Down	0.0246	17.564
Molecular Function	GO:0004812	6	aminoacyl-tRNA ligase activity	0.644846	Unigene13880_All	"2 757 minus strand PREDICTED: cysteinyl-tRNA synthetase, cytoplasmic-like [Nasonia vitripennis]"	0.765	Down	0.0363	29.175
Molecular Function	GO:0005506	7	iron ion binding	0.438429	Unigene18209_All	76 1596 PREDICTED: probable cytochrome P450 6a14-like isoform 2 [Bombus terrestris]	0.711	Down	0.00293	58.57
Molecular Function	GO:0005506	7	iron ion binding	0.438429	Unigene5734_All	92 1699 cytochrome P450 [Leptinotarsa decemlineata]	0.757	Down	0.042	62.532
Molecular Function	GO:0005506	7	iron ion binding	0.438429	Unigene8757_All	17 1501 cytochrome P450 26B1 [Culex quinquefasciatus] >gi|167873036|gb|EDS36419.1| cytochrome P450 26B1 [Culex quinquefasciatus]	0.774	Down	0.0128	57.271
Molecular Function	GO:0016705	4	oxidoreductase activity, acting on paired donors, with incorporation or reduction of molecular oxygen	0.194824	Unigene18209_All	76 1596 PREDICTED: probable cytochrome P450 6a14-like isoform 2 [Bombus terrestris]	0.711	Down	0.00293	58.57
Molecular Function	GO:0016705	4	oxidoreductase activity, acting on paired donors, with incorporation or reduction of molecular oxygen	0.194824	Unigene5734_All	92 1699 cytochrome P450 [Leptinotarsa decemlineata]	0.757	Down	0.042	62.532
Molecular Function	GO:0016705	4	oxidoreductase activity, acting on paired donors, with incorporation or reduction of molecular oxygen	0.194824	Unigene8757_All	17 1501 cytochrome P450 26B1 [Culex quinquefasciatus] >gi|167873036|gb|EDS36419.1| cytochrome P450 26B1 [Culex quinquefasciatus]	0.774	Down	0.0128	57.271
Molecular Function	GO:0016705	4	oxidoreductase activity, acting on paired donors, with incorporation or reduction of molecular oxygen	0.194824	Unigene1450_All	64 984 stearoyl-coa desaturase [Aedes aegypti] >gi|108880849|gb|EAT45074.1| stearoyl-coa desaturase [Aedes aegypti]	0.766	Down	0.0441	34.976
Molecular Function	GO:0016747	5	transferase activity, transferring acyl groups other than amino-acyl groups	0.00724023	Unigene20022_All	2 574 minus strand PREDICTED: similar to AGAP006821-PA [Tribolium castaneum]	0.800	Down	0.0155	19.686
Molecular Function	GO:0016747	5	transferase activity, transferring acyl groups other than amino-acyl groups	0.00724023	Unigene15050_All	184 1194 2-acylglycerol O-acyltransferase 1 [Harpegnathos saltator]	0.742	Down	0.00273	38.394
Molecular Function	GO:0016747	5	transferase activity, transferring acyl groups other than amino-acyl groups	0.00724023	Unigene3655_All	197 955 minus strand PREDICTED: 1-acyl-sn-glycerol-3-phosphate acyltransferase alpha-like isoform 2 [Acyrthosiphon pisum] >gi|328705891|ref|XP_001950878.2| PREDICTED: 1-acyl-sn-glycerol-3-phosphate acyltransferase alpha-like isoform 1 [Acyrthosiphon pisum]	0.625	Down	0.012	28.987
Molecular Function	GO:0016747	5	transferase activity, transferring acyl groups other than amino-acyl groups	0.00724023	Unigene8345_All	"3 317 PREDICTED: 3-ketoacyl-CoA thiolase, mitochondrial-like [Apis mellifera]"	0.752	Down	0.0244	11.709
Molecular Function	GO:0016747	5	transferase activity, transferring acyl groups other than amino-acyl groups	0.00724023	CL355.Contig1_All	3 3932 PREDICTED: fatty acid synthase-like isoform 1 [Acyrthosiphon pisum]	0.662	Down	0.00132	144.71
Molecular Function	GO:0004190	7	aspartic-type endopeptidase activity	0.208717	Unigene3551_All	221 1162 PREDICTED: cathepsin D-like [Oreochromis niloticus]	0.665	Down	0.0337	35.564
Molecular Function	GO:0004190	7	aspartic-type endopeptidase activity	0.208717	Unigene14022_All	40 1200 minus strand PREDICTED: lysosomal aspartic protease [Apis mellifera]	0.635	Down	0.00549	42.106
Molecular Function	GO:0005509	6	calcium ion binding	0.313288	Unigene18712_All	"94 384 Chain A, Solution Structure Of Fly Troponin C, Isoform F1 >gi|29788119|emb|CAD55595.1| troponin C [Lethocerus indicus]"	0.816	Down	0.0153	11.315
Molecular Function	GO:0005509	6	calcium ion binding	0.313288	Unigene7612_All	156 722 minus strand Calcium-binding protein p22 [Harpegnathos saltator]	0.712	Down	0.000976	21.993
Molecular Function	GO:0005509	6	calcium ion binding	0.313288	Unigene6257_All	"2 205 Chain A, Solution Structure Of The Apo C Terminal Domain Of Lethoceru C Isoform F1"	0.743	Down	0.0226	7.8014
Molecular Function	GO:0005509	6	calcium ion binding	0.313288	CL1757.Contig2_All	55 1005 minus strand annexin IX-like [Acyrthosiphon pisum] >gi|239788624|dbj|BAH70984.1| ACYPI007342 [Acyrthosiphon pisum]	0.435	Down	0.0254	34.963
Molecular Function	GO:0016876	5	ligase activity, forming aminoacyl-tRNA and related compounds	0.653159	Unigene33011_All	"82 528 PREDICTED: isoleucyl-tRNA synthetase, cytoplasmic [Amphimedon queenslandica]"	0.827	Down	0.0246	17.564
Molecular Function	GO:0016876	5	ligase activity, forming aminoacyl-tRNA and related compounds	0.653159	Unigene13880_All	"2 757 minus strand PREDICTED: cysteinyl-tRNA synthetase, cytoplasmic-like [Nasonia vitripennis]"	0.765	Down	0.0363	29.175
Molecular Function	GO:0016614	4	oxidoreductase activity, acting on CH-OH group of donors	0.0328876	Unigene18208_All	"134 1579 minus strand 6-phosphogluconate dehydrogenase, decarboxylating [Acromyrmex echinatior]"	0.790	Down	0.00187	52.8
Molecular Function	GO:0016614	4	oxidoreductase activity, acting on CH-OH group of donors	0.0328876	CL1513.Contig3_All	"3 1289 minus strand PREDICTED: d-2-hydroxyglutarate dehydrogenase, mitochondrial-like [Nasonia vitripennis]"	0.832	Down	0.0317	46.935
Molecular Function	GO:0016614	4	oxidoreductase activity, acting on CH-OH group of donors	0.0328876	Unigene5698_All	149 1282 minus strand PREDICTED: alcohol dehydrogenase class-3 [Apis mellifera]	0.778	Down	0.0225	40.6
Molecular Function	GO:0016614	4	oxidoreductase activity, acting on CH-OH group of donors	0.0328876	Unigene2273_All	"147 1178 minus strand PREDICTED: glycerol-3-phosphate dehydrogenase [NAD+], cytoplasmic-like [Bombus impatiens]"	0.498	Down	0.00046	37.841
Molecular Function	GO:0016614	4	oxidoreductase activity, acting on CH-OH group of donors	0.0328876	CL355.Contig1_All	3 3932 PREDICTED: fatty acid synthase-like isoform 1 [Acyrthosiphon pisum]	0.662	Down	0.00132	144.71
Molecular Function	GO:0016740	3	transferase activity	0.114459	CL2044.Contig1_All	1 1365 minus strand PREDICTED: fatty acid synthase-like isoform 1 [Nasonia vitripennis]	0.725	Down	0.00618	50.598
Molecular Function	GO:0016740	3	transferase activity	0.114459	Unigene15050_All	184 1194 2-acylglycerol O-acyltransferase 1 [Harpegnathos saltator]	0.742	Down	0.00273	38.394
Molecular Function	GO:0016740	3	transferase activity	0.114459	Unigene13998_All	168 1145 minus strand transaldolase [Aedes aegypti] >gi|108874520|gb|EAT38745.1| transaldolase [Aedes aegypti]	0.751	Down	0.00357	36.463
Molecular Function	GO:0016740	3	transferase activity	0.114459	Unigene9881_All	180 1940 PREDICTED: similar to 5-aminoimidazole-4-carboxamide ribonucleotide formyltransferase/IMP cyclohydrolase [Tribolium castaneum]	0.793	Down	0.00606	64.036
Molecular Function	GO:0016740	3	transferase activity	0.114459	Unigene3655_All	197 955 minus strand PREDICTED: 1-acyl-sn-glycerol-3-phosphate acyltransferase alpha-like isoform 2 [Acyrthosiphon pisum] >gi|328705891|ref|XP_001950878.2| PREDICTED: 1-acyl-sn-glycerol-3-phosphate acyltransferase alpha-like isoform 1 [Acyrthosiphon pisum]	0.625	Down	0.012	28.987
Molecular Function	GO:0016740	3	transferase activity	0.114459	Unigene8345_All	"3 317 PREDICTED: 3-ketoacyl-CoA thiolase, mitochondrial-like [Apis mellifera]"	0.752	Down	0.0244	11.709
Molecular Function	GO:0016740	3	transferase activity	0.114459	Unigene10619_All	221 2323 minus strand PREDICTED: similar to transglutaminase [Tribolium castaneum]	0.638	Down	0.00093	78.62
Molecular Function	GO:0016740	3	transferase activity	0.114459	Unigene20022_All	2 574 minus strand PREDICTED: similar to AGAP006821-PA [Tribolium castaneum]	0.800	Down	0.0155	19.686
Molecular Function	GO:0016740	3	transferase activity	0.114459	Unigene18230_All	103 672 PREDICTED: similar to F38B2.4 [Tribolium castaneum]	0.759	Down	0.0176	21.02
Molecular Function	GO:0016740	3	transferase activity	0.114459	Unigene15092_All	217 1584 hydroxymethylglutaryl-CoA synthase 1 [Culex quinquefasciatus] >gi|167868813|gb|EDS32196.1| hydroxymethylglutaryl-CoA synthase 1 [Culex quinquefasciatus]	0.707	Down	0.00763	50.213
Molecular Function	GO:0016740	3	transferase activity	0.114459	Unigene4562_All	20 2536 minus strand PREDICTED: LOW QUALITY PROTEIN: glycogen phosphorylase-like [Nasonia vitripennis]	0.619	Down	0.00135	96.669
Molecular Function	GO:0016740	3	transferase activity	0.114459	Unigene29886_All	16 534 Dihydroxyacetone kinase [Harpegnathos saltator]	0.671	Down	0.0123	18.377
Molecular Function	GO:0016740	3	transferase activity	0.114459	CL355.Contig1_All	3 3932 PREDICTED: fatty acid synthase-like isoform 1 [Acyrthosiphon pisum]	0.662	Down	0.00132	144.71
Molecular Function	GO:0005215	2	transporter activity	0.269074	Unigene10595_All	9 1373 minus strand sugar transporter 2 [Nilaparvata lugens]	0.663	Down	0.00543	49.419
Molecular Function	GO:0005215	2	transporter activity	0.269074	Unigene12587_All	22 9981 lipophorin precursor [Nilaparvata lugens]	0.649	Down	0.00216	363.65
Molecular Function	GO:0005215	2	transporter activity	0.269074	Unigene12098_All	120 971 minus strand PREDICTED: similar to CRALBP [Tribolium castaneum]	0.593	Down	0.00399	32.781
Molecular Function	GO:0005215	2	transporter activity	0.269074	CL198.Contig2_All	110 982 CRAL/TRIO domain-containing protein [Culex quinquefasciatus] >gi|167869862|gb|EDS33245.1| CRAL/TRIO domain-containing protein [Culex quinquefasciatus]	0.767	Down	0.0339	34.003
Molecular Function	GO:0005215	2	transporter activity	0.269074	Unigene18271_All	296 1135 minus strand CRAL/TRIO domain-containing protein [Culex quinquefasciatus] >gi|167869862|gb|EDS33245.1| CRAL/TRIO domain-containing protein [Culex quinquefasciatus]	0.699	Down	0.041	32.166
Molecular Function	GO:0005215	2	transporter activity	0.269074	CL1902.Contig1_All	184 579 MPA13-like protein [Lygus lineolaris]	0.773	Down	0.00798	14.798
Molecular Function	GO:0016829	3	lyase activity	0.0843872	Unigene9915_All	"121 1416 RecName: Full=Enolase; AltName: Full=2-phospho-D-glycerate hydro-lyase; AltName: Full=2-phosphoglycerate dehydratase >gi|157833457|pdb|1PDY|A Chain A, X-Ray Structure And Catalytic Mechanism Of Lobster Enolase >gi|157833458|pdb|1PDZ|A Chain A, X-Ray Structure And Catalytic Mechanism Of Lobster Enolase"	0.780	Down	0.002	46.625
Molecular Function	GO:0016829	3	lyase activity	0.0843872	Unigene20231_All	119 1384 Threonine dehydratase catabolic [Harpegnathos saltator]	0.652	Down	0.00741	45.437
Molecular Function	GO:0016829	3	lyase activity	0.0843872	Unigene14014_All	"90 1181 fructose 1,6-bisphosphate aldolase [Schistocerca gregaria]"	0.831	Down	0.00275	39.841
Molecular Function	GO:0016829	3	lyase activity	0.0843872	CL355.Contig1_All	3 3932 PREDICTED: fatty acid synthase-like isoform 1 [Acyrthosiphon pisum]	0.662	Down	0.00132	144.71
Molecular Function	GO:0016836	5	hydro-lyase activity	0.312635	Unigene9915_All	"121 1416 RecName: Full=Enolase; AltName: Full=2-phospho-D-glycerate hydro-lyase; AltName: Full=2-phosphoglycerate dehydratase >gi|157833457|pdb|1PDY|A Chain A, X-Ray Structure And Catalytic Mechanism Of Lobster Enolase >gi|157833458|pdb|1PDZ|A Chain A, X-Ray Structure And Catalytic Mechanism Of Lobster Enolase"	0.780	Down	0.002	46.625
Molecular Function	GO:0016836	5	hydro-lyase activity	0.312635	CL355.Contig1_All	3 3932 PREDICTED: fatty acid synthase-like isoform 1 [Acyrthosiphon pisum]	0.662	Down	0.00132	144.71
Molecular Function	GO:0016746	4	transferase activity, transferring acyl groups	0.00109942	Unigene20022_All	2 574 minus strand PREDICTED: similar to AGAP006821-PA [Tribolium castaneum]	0.800	Down	0.0155	19.686
Molecular Function	GO:0016746	4	transferase activity, transferring acyl groups	0.00109942	Unigene15092_All	217 1584 hydroxymethylglutaryl-CoA synthase 1 [Culex quinquefasciatus] >gi|167868813|gb|EDS32196.1| hydroxymethylglutaryl-CoA synthase 1 [Culex quinquefasciatus]	0.707	Down	0.00763	50.213
Molecular Function	GO:0016746	4	transferase activity, transferring acyl groups	0.00109942	Unigene15050_All	184 1194 2-acylglycerol O-acyltransferase 1 [Harpegnathos saltator]	0.742	Down	0.00273	38.394
Molecular Function	GO:0016746	4	transferase activity, transferring acyl groups	0.00109942	Unigene3655_All	197 955 minus strand PREDICTED: 1-acyl-sn-glycerol-3-phosphate acyltransferase alpha-like isoform 2 [Acyrthosiphon pisum] >gi|328705891|ref|XP_001950878.2| PREDICTED: 1-acyl-sn-glycerol-3-phosphate acyltransferase alpha-like isoform 1 [Acyrthosiphon pisum]	0.625	Down	0.012	28.987
Molecular Function	GO:0016746	4	transferase activity, transferring acyl groups	0.00109942	Unigene8345_All	"3 317 PREDICTED: 3-ketoacyl-CoA thiolase, mitochondrial-like [Apis mellifera]"	0.752	Down	0.0244	11.709
Molecular Function	GO:0016746	4	transferase activity, transferring acyl groups	0.00109942	CL355.Contig1_All	3 3932 PREDICTED: fatty acid synthase-like isoform 1 [Acyrthosiphon pisum]	0.662	Down	0.00132	144.71
Molecular Function	GO:0016746	4	transferase activity, transferring acyl groups	0.00109942	Unigene10619_All	221 2323 minus strand PREDICTED: similar to transglutaminase [Tribolium castaneum]	0.638	Down	0.00093	78.62
Molecular Function	GO:0005549	3	odorant binding	0.262481	Unigene17945_All	76 531 minus strand odorant-binding protein RproOBP2 precursor [Rhodnius prolixus]	0.447	Down	0.0081	17.08
Molecular Function	GO:0005549	3	odorant binding	0.262481	Unigene20082_All	163 741 odorant binding protein [Bemisia tabaci]	0.774	Down	0.0124	21.923
Molecular Function	GO:0070001	6	aspartic-type peptidase activity	0.208717	Unigene3551_All	221 1162 PREDICTED: cathepsin D-like [Oreochromis niloticus]	0.665	Down	0.0337	35.564
Molecular Function	GO:0070001	6	aspartic-type peptidase activity	0.208717	Unigene14022_All	40 1200 minus strand PREDICTED: lysosomal aspartic protease [Apis mellifera]	0.635	Down	0.00549	42.106
Molecular Function	GO:0046906	4	tetrapyrrole binding	0.514745	Unigene18209_All	76 1596 PREDICTED: probable cytochrome P450 6a14-like isoform 2 [Bombus terrestris]	0.711	Down	0.00293	58.57
Molecular Function	GO:0046906	4	tetrapyrrole binding	0.514745	Unigene5734_All	92 1699 cytochrome P450 [Leptinotarsa decemlineata]	0.757	Down	0.042	62.532
Molecular Function	GO:0046906	4	tetrapyrrole binding	0.514745	Unigene8757_All	17 1501 cytochrome P450 26B1 [Culex quinquefasciatus] >gi|167873036|gb|EDS36419.1| cytochrome P450 26B1 [Culex quinquefasciatus]	0.774	Down	0.0128	57.271
Molecular Function	GO:0016491	3	oxidoreductase activity	0.00302919	Unigene17996_All	185 778 minus strand Mn superoxide dismutase [Bombyx mori] >gi|52421187|dbj|BAD51413.1| Mn superoxide dismutase [Bombyx mori] >gi|58429979|gb|AAW78358.1| Mn superoxide dismutase [Bombyx mori]	0.793	Down	0.0311	22.389
Molecular Function	GO:0016491	3	oxidoreductase activity	0.00302919	Unigene2273_All	"147 1178 minus strand PREDICTED: glycerol-3-phosphate dehydrogenase [NAD+], cytoplasmic-like [Bombus impatiens]"	0.498	Down	0.00046	37.841
Molecular Function	GO:0016491	3	oxidoreductase activity	0.00302919	Unigene12882_All	105 2138 phenoloxidase subunit A3 [Apis mellifera] >gi|41350389|gb|AAO72539.2| prophenoloxidase [Apis mellifera]	0.675	Down	0.00641	78.555
Molecular Function	GO:0016491	3	oxidoreductase activity	0.00302919	Unigene18209_All	76 1596 PREDICTED: probable cytochrome P450 6a14-like isoform 2 [Bombus terrestris]	0.711	Down	0.00293	58.57
Molecular Function	GO:0016491	3	oxidoreductase activity	0.00302919	Unigene7775_All	89 1078 GE24563 [Drosophila yakuba] >gi|194183414|gb|EDW97025.1| GE24563 [Drosophila yakuba]	0.824	Down	0.00596	36.994
Molecular Function	GO:0016491	3	oxidoreductase activity	0.00302919	Unigene5625_All	80 499 PREDICTED: similar to AGAP008653-PA [Tribolium castaneum]	0.801	Down	0.0058	16.666
Molecular Function	GO:0016491	3	oxidoreductase activity	0.00302919	Unigene18208_All	"134 1579 minus strand 6-phosphogluconate dehydrogenase, decarboxylating [Acromyrmex echinatior]"	0.790	Down	0.00187	52.8
Molecular Function	GO:0016491	3	oxidoreductase activity	0.00302919	CL3986.Contig1_All	1 732 PREDICTED: similar to serine 3-dehydrogenase [Tribolium castaneum]	0.561	Down	0.000204	26.504
Molecular Function	GO:0016491	3	oxidoreductase activity	0.00302919	Unigene16109_All	52 2097 minus strand pro-phenol oxidase subunit 2 [Tribolium castaneum] >gi|70999576|gb|AAX84205.1| pro-phenol oxidase subunit 2 [Tribolium castaneum]	0.768	Down	0.015	79.041
Molecular Function	GO:0016491	3	oxidoreductase activity	0.00302919	Unigene1450_All	64 984 stearoyl-coa desaturase [Aedes aegypti] >gi|108880849|gb|EAT45074.1| stearoyl-coa desaturase [Aedes aegypti]	0.766	Down	0.0441	34.976
Molecular Function	GO:0016491	3	oxidoreductase activity	0.00302919	Unigene7763_All	113 1108 Gapdh2 [Drosophila pseudoobscura pseudoobscura] >gi|115312169|sp|O44104.2|G3P2_DROPS RecName: Full=Glyceraldehyde-3-phosphate dehydrogenase 2; AltName: Full=Glyceraldehyde-3-phosphate dehydrogenase II; Short=GAPDH II >gi|54640108|gb|EAL29271.1| Gapdh2 [Drosophila pseudoobscura pseudoobscura]	0.731	Down	0.00297	35.654
Molecular Function	GO:0016491	3	oxidoreductase activity	0.00302919	Unigene5734_All	92 1699 cytochrome P450 [Leptinotarsa decemlineata]	0.757	Down	0.042	62.532
Molecular Function	GO:0016491	3	oxidoreductase activity	0.00302919	Unigene20298_All	114 842 L-xylulose reductase [Anoplopoma fimbria]	0.831	Down	0.0132	26.234
Molecular Function	GO:0016491	3	oxidoreductase activity	0.00302919	Unigene14079_All	2 1435 prophenoloxidase [Tenebrio molitor]	0.679	Down	0.0176	55.465
Molecular Function	GO:0016491	3	oxidoreductase activity	0.00302919	CL1513.Contig3_All	"3 1289 minus strand PREDICTED: d-2-hydroxyglutarate dehydrogenase, mitochondrial-like [Nasonia vitripennis]"	0.832	Down	0.0317	46.935
Molecular Function	GO:0016491	3	oxidoreductase activity	0.00302919	Unigene5698_All	149 1282 minus strand PREDICTED: alcohol dehydrogenase class-3 [Apis mellifera]	0.778	Down	0.0225	40.6
Molecular Function	GO:0016491	3	oxidoreductase activity	0.00302919	Unigene8757_All	17 1501 cytochrome P450 26B1 [Culex quinquefasciatus] >gi|167873036|gb|EDS36419.1| cytochrome P450 26B1 [Culex quinquefasciatus]	0.774	Down	0.0128	57.271
Molecular Function	GO:0016491	3	oxidoreductase activity	0.00302919	CL355.Contig1_All	3 3932 PREDICTED: fatty acid synthase-like isoform 1 [Acyrthosiphon pisum]	0.662	Down	0.00132	144.71
Molecular Function	GO:0016853	3	isomerase activity	0.61871	Unigene7760_All	55 1284 minus strand Mannose-6-phosphate isomerase [Acromyrmex echinatior]	0.796	Down	0.00446	46.843
Molecular Function	GO:0016853	3	isomerase activity	0.61871	CL217.Contig1_All	166 1077 AGAP012261-PA [Anopheles gambiae str. PEST] >gi|55234400|gb|EAA00282.3| AGAP012261-PA [Anopheles gambiae str. PEST]	0.824	Down	0.0427	34.022
Molecular Function	GO:0016875	4	ligase activity, forming carbon-oxygen bonds	0.653159	Unigene33011_All	"82 528 PREDICTED: isoleucyl-tRNA synthetase, cytoplasmic [Amphimedon queenslandica]"	0.827	Down	0.0246	17.564
Molecular Function	GO:0016875	4	ligase activity, forming carbon-oxygen bonds	0.653159	Unigene13880_All	"2 757 minus strand PREDICTED: cysteinyl-tRNA synthetase, cytoplasmic-like [Nasonia vitripennis]"	0.765	Down	0.0363	29.175
Molecular Function	GO:0016874	3	ligase activity	0.543347	Unigene22213_All	"300 1205 PREDICTED: pyruvate carboxylase, mitochondrial-like [Apis mellifera]"	0.812	Down	0.0223	33.345
Molecular Function	GO:0016874	3	ligase activity	0.543347	Unigene33011_All	"82 528 PREDICTED: isoleucyl-tRNA synthetase, cytoplasmic [Amphimedon queenslandica]"	0.827	Down	0.0246	17.564
Molecular Function	GO:0016874	3	ligase activity	0.543347	Unigene13880_All	"2 757 minus strand PREDICTED: cysteinyl-tRNA synthetase, cytoplasmic-like [Nasonia vitripennis]"	0.765	Down	0.0363	29.175
Molecular Function	GO:0016835	4	carbon-oxygen lyase activity	0.328592	Unigene9915_All	"121 1416 RecName: Full=Enolase; AltName: Full=2-phospho-D-glycerate hydro-lyase; AltName: Full=2-phosphoglycerate dehydratase >gi|157833457|pdb|1PDY|A Chain A, X-Ray Structure And Catalytic Mechanism Of Lobster Enolase >gi|157833458|pdb|1PDZ|A Chain A, X-Ray Structure And Catalytic Mechanism Of Lobster Enolase"	0.780	Down	0.002	46.625
Molecular Function	GO:0016835	4	carbon-oxygen lyase activity	0.328592	CL355.Contig1_All	3 3932 PREDICTED: fatty acid synthase-like isoform 1 [Acyrthosiphon pisum]	0.662	Down	0.00132	144.71
Molecular Function	GO:0016887	8	ATPase activity	0.485014	Unigene8763_All	251 2038 minus strand PREDICTED: similar to abc transporter [Tribolium castaneum]	0.515	Down	0.00141	67.419
Molecular Function	GO:0016887	8	ATPase activity	0.485014	Unigene5691_All	214 2238 PREDICTED: ATP-binding cassette sub-family G member 4-like isoform 2 [Acyrthosiphon pisum]	0.636	Down	0.00125	75.268
Molecular Function	GO:0016887	8	ATPase activity	0.485014	CL1207.Contig1_All	296 2851 minus strand PREDICTED: similar to AGAP010451-PA [Tribolium castaneum]	0.796	Down	0.0126	95.964
Molecular Function	GO:0016616	5	oxidoreductase activity, acting on the CH-OH group of donors, NAD or NADP as acceptor	0.0457753	Unigene18208_All	"134 1579 minus strand 6-phosphogluconate dehydrogenase, decarboxylating [Acromyrmex echinatior]"	0.790	Down	0.00187	52.8
Molecular Function	GO:0016616	5	oxidoreductase activity, acting on the CH-OH group of donors, NAD or NADP as acceptor	0.0457753	Unigene5698_All	149 1282 minus strand PREDICTED: alcohol dehydrogenase class-3 [Apis mellifera]	0.778	Down	0.0225	40.6
Molecular Function	GO:0016616	5	oxidoreductase activity, acting on the CH-OH group of donors, NAD or NADP as acceptor	0.0457753	Unigene2273_All	"147 1178 minus strand PREDICTED: glycerol-3-phosphate dehydrogenase [NAD+], cytoplasmic-like [Bombus impatiens]"	0.498	Down	0.00046	37.841
Molecular Function	GO:0016616	5	oxidoreductase activity, acting on the CH-OH group of donors, NAD or NADP as acceptor	0.0457753	CL355.Contig1_All	3 3932 PREDICTED: fatty acid synthase-like isoform 1 [Acyrthosiphon pisum]	0.662	Down	0.00132	144.71
Molecular Function	GO:0020037	5	heme binding	0.514745	Unigene18209_All	76 1596 PREDICTED: probable cytochrome P450 6a14-like isoform 2 [Bombus terrestris]	0.711	Down	0.00293	58.57
Molecular Function	GO:0020037	5	heme binding	0.514745	Unigene5734_All	92 1699 cytochrome P450 [Leptinotarsa decemlineata]	0.757	Down	0.042	62.532
Molecular Function	GO:0020037	5	heme binding	0.514745	Unigene8757_All	17 1501 cytochrome P450 26B1 [Culex quinquefasciatus] >gi|167873036|gb|EDS36419.1| cytochrome P450 26B1 [Culex quinquefasciatus]	0.774	Down	0.0128	57.271
Molecular Function	GO:0008289	3	lipid binding	0.09046	CL1757.Contig2_All	55 1005 minus strand annexin IX-like [Acyrthosiphon pisum] >gi|239788624|dbj|BAH70984.1| ACYPI007342 [Acyrthosiphon pisum]	0.435	Down	0.0254	34.963
Molecular Function	GO:0008289	3	lipid binding	0.09046	Unigene6577_All	206 781 JR-1 [Riptortus clavatus]	0.436	Down	0.000352	21.332
Molecular Function	GO:0008289	3	lipid binding	0.09046	CL1902.Contig1_All	184 579 MPA13-like protein [Lygus lineolaris]	0.773	Down	0.00798	14.798
Molecular Function	GO:0048037	3	cofactor binding	0.342892	Unigene3993_All	97 354 acyl-CoA binding protein [Rhodnius prolixus]	0.775	Down	0.00889	9.5806
Molecular Function	GO:0048037	3	cofactor binding	0.342892	Unigene4562_All	20 2536 minus strand PREDICTED: LOW QUALITY PROTEIN: glycogen phosphorylase-like [Nasonia vitripennis]	0.619	Down	0.00135	96.669
Molecular Function	GO:0048037	3	cofactor binding	0.342892	CL1513.Contig3_All	"3 1289 minus strand PREDICTED: d-2-hydroxyglutarate dehydrogenase, mitochondrial-like [Nasonia vitripennis]"	0.832	Down	0.0317	46.935
Molecular Function	GO:0048037	3	cofactor binding	0.342892	Unigene2273_All	"147 1178 minus strand PREDICTED: glycerol-3-phosphate dehydrogenase [NAD+], cytoplasmic-like [Bombus impatiens]"	0.498	Down	0.00046	37.841
Molecular Function	GO:0048037	3	cofactor binding	0.342892	Unigene7763_All	113 1108 Gapdh2 [Drosophila pseudoobscura pseudoobscura] >gi|115312169|sp|O44104.2|G3P2_DROPS RecName: Full=Glyceraldehyde-3-phosphate dehydrogenase 2; AltName: Full=Glyceraldehyde-3-phosphate dehydrogenase II; Short=GAPDH II >gi|54640108|gb|EAL29271.1| Gapdh2 [Drosophila pseudoobscura pseudoobscura]	0.731	Down	0.00297	35.654
Molecular Function	GO:0051287	6	NAD binding	0.517103	Unigene2273_All	"147 1178 minus strand PREDICTED: glycerol-3-phosphate dehydrogenase [NAD+], cytoplasmic-like [Bombus impatiens]"	0.498	Down	0.00046	37.841
Molecular Function	GO:0051287	6	NAD binding	0.517103	Unigene7763_All	113 1108 Gapdh2 [Drosophila pseudoobscura pseudoobscura] >gi|115312169|sp|O44104.2|G3P2_DROPS RecName: Full=Glyceraldehyde-3-phosphate dehydrogenase 2; AltName: Full=Glyceraldehyde-3-phosphate dehydrogenase II; Short=GAPDH II >gi|54640108|gb|EAL29271.1| Gapdh2 [Drosophila pseudoobscura pseudoobscura]	0.731	Down	0.00297	35.654
Molecular Function	GO:0050662	4	coenzyme binding	0.332509	Unigene3993_All	97 354 acyl-CoA binding protein [Rhodnius prolixus]	0.775	Down	0.00889	9.5806
Molecular Function	GO:0050662	4	coenzyme binding	0.332509	CL1513.Contig3_All	"3 1289 minus strand PREDICTED: d-2-hydroxyglutarate dehydrogenase, mitochondrial-like [Nasonia vitripennis]"	0.832	Down	0.0317	46.935
Molecular Function	GO:0050662	4	coenzyme binding	0.332509	Unigene2273_All	"147 1178 minus strand PREDICTED: glycerol-3-phosphate dehydrogenase [NAD+], cytoplasmic-like [Bombus impatiens]"	0.498	Down	0.00046	37.841
Molecular Function	GO:0050662	4	coenzyme binding	0.332509	Unigene7763_All	113 1108 Gapdh2 [Drosophila pseudoobscura pseudoobscura] >gi|115312169|sp|O44104.2|G3P2_DROPS RecName: Full=Glyceraldehyde-3-phosphate dehydrogenase 2; AltName: Full=Glyceraldehyde-3-phosphate dehydrogenase II; Short=GAPDH II >gi|54640108|gb|EAL29271.1| Gapdh2 [Drosophila pseudoobscura pseudoobscura]	0.731	Down	0.00297	35.654
Cellular Component	GO:0005576	2	extracellular region	0.343743	Unigene12008_All	95 601 GA16817 [Drosophila pseudoobscura pseudoobscura] >gi|198150655|gb|EAL29780.2| GA16817 [Drosophila pseudoobscura pseudoobscura]	0.754	Down	0.0335	17.954
Cellular Component	GO:0005576	2	extracellular region	0.343743	Unigene19700_All	3 1949 minus strand transferrin [Riptortus clavatus]	0.306	Down	0.000797	71.457
Cellular Component	GO:0005576	2	extracellular region	0.343743	Unigene6577_All	206 781 JR-1 [Riptortus clavatus]	0.436	Down	0.000352	21.332
Biological Process	GO:0006165	10	nucleoside diphosphate phosphorylation	0.265003	Unigene9915_All	"121 1416 RecName: Full=Enolase; AltName: Full=2-phospho-D-glycerate hydro-lyase; AltName: Full=2-phosphoglycerate dehydratase >gi|157833457|pdb|1PDY|A Chain A, X-Ray Structure And Catalytic Mechanism Of Lobster Enolase >gi|157833458|pdb|1PDZ|A Chain A, X-Ray Structure And Catalytic Mechanism Of Lobster Enolase"	0.780	Down	0.002	46.625
Biological Process	GO:0006165	10	nucleoside diphosphate phosphorylation	0.265003	Unigene14014_All	"90 1181 fructose 1,6-bisphosphate aldolase [Schistocerca gregaria]"	0.831	Down	0.00275	39.841
Biological Process	GO:0019362	9	pyridine nucleotide metabolic process	0.0102648	Unigene18208_All	"134 1579 minus strand 6-phosphogluconate dehydrogenase, decarboxylating [Acromyrmex echinatior]"	0.790	Down	0.00187	52.8
Biological Process	GO:0019362	9	pyridine nucleotide metabolic process	0.0102648	Unigene9915_All	"121 1416 RecName: Full=Enolase; AltName: Full=2-phospho-D-glycerate hydro-lyase; AltName: Full=2-phosphoglycerate dehydratase >gi|157833457|pdb|1PDY|A Chain A, X-Ray Structure And Catalytic Mechanism Of Lobster Enolase >gi|157833458|pdb|1PDZ|A Chain A, X-Ray Structure And Catalytic Mechanism Of Lobster Enolase"	0.780	Down	0.002	46.625
Biological Process	GO:0019362	9	pyridine nucleotide metabolic process	0.0102648	Unigene14014_All	"90 1181 fructose 1,6-bisphosphate aldolase [Schistocerca gregaria]"	0.831	Down	0.00275	39.841
Biological Process	GO:0019362	9	pyridine nucleotide metabolic process	0.0102648	Unigene13998_All	168 1145 minus strand transaldolase [Aedes aegypti] >gi|108874520|gb|EAT38745.1| transaldolase [Aedes aegypti]	0.751	Down	0.00357	36.463
Biological Process	GO:0006096	13	glycolytic process	0.244092	Unigene9915_All	"121 1416 RecName: Full=Enolase; AltName: Full=2-phospho-D-glycerate hydro-lyase; AltName: Full=2-phosphoglycerate dehydratase >gi|157833457|pdb|1PDY|A Chain A, X-Ray Structure And Catalytic Mechanism Of Lobster Enolase >gi|157833458|pdb|1PDZ|A Chain A, X-Ray Structure And Catalytic Mechanism Of Lobster Enolase"	0.780	Down	0.002	46.625
Biological Process	GO:0006096	13	glycolytic process	0.244092	Unigene14014_All	"90 1181 fructose 1,6-bisphosphate aldolase [Schistocerca gregaria]"	0.831	Down	0.00275	39.841
Biological Process	GO:0006066	5	alcohol metabolic process	0.130431	Unigene5698_All	149 1282 minus strand PREDICTED: alcohol dehydrogenase class-3 [Apis mellifera]	0.778	Down	0.0225	40.6
Biological Process	GO:0006066	5	alcohol metabolic process	0.130431	Unigene29886_All	16 534 Dihydroxyacetone kinase [Harpegnathos saltator]	0.671	Down	0.0123	18.377
Biological Process	GO:0009185	9	ribonucleoside diphosphate metabolic process	0.244092	Unigene9915_All	"121 1416 RecName: Full=Enolase; AltName: Full=2-phospho-D-glycerate hydro-lyase; AltName: Full=2-phosphoglycerate dehydratase >gi|157833457|pdb|1PDY|A Chain A, X-Ray Structure And Catalytic Mechanism Of Lobster Enolase >gi|157833458|pdb|1PDZ|A Chain A, X-Ray Structure And Catalytic Mechanism Of Lobster Enolase"	0.780	Down	0.002	46.625
Biological Process	GO:0009185	9	ribonucleoside diphosphate metabolic process	0.244092	Unigene14014_All	"90 1181 fructose 1,6-bisphosphate aldolase [Schistocerca gregaria]"	0.831	Down	0.00275	39.841
Biological Process	GO:0044255	5	cellular lipid metabolic process	0.719026	Unigene15092_All	217 1584 hydroxymethylglutaryl-CoA synthase 1 [Culex quinquefasciatus] >gi|167868813|gb|EDS32196.1| hydroxymethylglutaryl-CoA synthase 1 [Culex quinquefasciatus]	0.707	Down	0.00763	50.213
Biological Process	GO:0044255	5	cellular lipid metabolic process	0.719026	Unigene3655_All	197 955 minus strand PREDICTED: 1-acyl-sn-glycerol-3-phosphate acyltransferase alpha-like isoform 2 [Acyrthosiphon pisum] >gi|328705891|ref|XP_001950878.2| PREDICTED: 1-acyl-sn-glycerol-3-phosphate acyltransferase alpha-like isoform 1 [Acyrthosiphon pisum]	0.625	Down	0.012	28.987
Biological Process	GO:0008610	5	lipid biosynthetic process	0.518216	Unigene15092_All	217 1584 hydroxymethylglutaryl-CoA synthase 1 [Culex quinquefasciatus] >gi|167868813|gb|EDS32196.1| hydroxymethylglutaryl-CoA synthase 1 [Culex quinquefasciatus]	0.707	Down	0.00763	50.213
Biological Process	GO:0008610	5	lipid biosynthetic process	0.518216	Unigene3655_All	197 955 minus strand PREDICTED: 1-acyl-sn-glycerol-3-phosphate acyltransferase alpha-like isoform 2 [Acyrthosiphon pisum] >gi|328705891|ref|XP_001950878.2| PREDICTED: 1-acyl-sn-glycerol-3-phosphate acyltransferase alpha-like isoform 1 [Acyrthosiphon pisum]	0.625	Down	0.012	28.987
Biological Process	GO:0006091	4	generation of precursor metabolites and energy	0.615851	Unigene9915_All	"121 1416 RecName: Full=Enolase; AltName: Full=2-phospho-D-glycerate hydro-lyase; AltName: Full=2-phosphoglycerate dehydratase >gi|157833457|pdb|1PDY|A Chain A, X-Ray Structure And Catalytic Mechanism Of Lobster Enolase >gi|157833458|pdb|1PDZ|A Chain A, X-Ray Structure And Catalytic Mechanism Of Lobster Enolase"	0.780	Down	0.002	46.625
Biological Process	GO:0006091	4	generation of precursor metabolites and energy	0.615851	Unigene14014_All	"90 1181 fructose 1,6-bisphosphate aldolase [Schistocerca gregaria]"	0.831	Down	0.00275	39.841
Biological Process	GO:0044262	5	cellular carbohydrate metabolic process	0.379039	Unigene12651_All	"199 2463 PREDICTED: alpha,alpha-trehalose-phosphate synthase [UDP-forming] A-like [Acyrthosiphon pisum]"	0.819	Down	0.0358	85.385
Biological Process	GO:0044262	5	cellular carbohydrate metabolic process	0.379039	Unigene29886_All	16 534 Dihydroxyacetone kinase [Harpegnathos saltator]	0.671	Down	0.0123	18.377
Biological Process	GO:0032787	8	monocarboxylic acid metabolic process	0.593442	Unigene9915_All	"121 1416 RecName: Full=Enolase; AltName: Full=2-phospho-D-glycerate hydro-lyase; AltName: Full=2-phosphoglycerate dehydratase >gi|157833457|pdb|1PDY|A Chain A, X-Ray Structure And Catalytic Mechanism Of Lobster Enolase >gi|157833458|pdb|1PDZ|A Chain A, X-Ray Structure And Catalytic Mechanism Of Lobster Enolase"	0.780	Down	0.002	46.625
Biological Process	GO:0032787	8	monocarboxylic acid metabolic process	0.593442	Unigene14014_All	"90 1181 fructose 1,6-bisphosphate aldolase [Schistocerca gregaria]"	0.831	Down	0.00275	39.841
Biological Process	GO:0019693	6	ribose phosphate metabolic process	0.137466	Unigene18208_All	"134 1579 minus strand 6-phosphogluconate dehydrogenase, decarboxylating [Acromyrmex echinatior]"	0.790	Down	0.00187	52.8
Biological Process	GO:0019693	6	ribose phosphate metabolic process	0.137466	Unigene9915_All	"121 1416 RecName: Full=Enolase; AltName: Full=2-phospho-D-glycerate hydro-lyase; AltName: Full=2-phosphoglycerate dehydratase >gi|157833457|pdb|1PDY|A Chain A, X-Ray Structure And Catalytic Mechanism Of Lobster Enolase >gi|157833458|pdb|1PDZ|A Chain A, X-Ray Structure And Catalytic Mechanism Of Lobster Enolase"	0.780	Down	0.002	46.625
Biological Process	GO:0019693	6	ribose phosphate metabolic process	0.137466	Unigene14014_All	"90 1181 fructose 1,6-bisphosphate aldolase [Schistocerca gregaria]"	0.831	Down	0.00275	39.841
Biological Process	GO:0019693	6	ribose phosphate metabolic process	0.137466	Unigene13998_All	168 1145 minus strand transaldolase [Aedes aegypti] >gi|108874520|gb|EAT38745.1| transaldolase [Aedes aegypti]	0.751	Down	0.00357	36.463
Biological Process	GO:0006098	12	pentose-phosphate shunt	0.130431	Unigene18208_All	"134 1579 minus strand 6-phosphogluconate dehydrogenase, decarboxylating [Acromyrmex echinatior]"	0.790	Down	0.00187	52.8
Biological Process	GO:0006098	12	pentose-phosphate shunt	0.130431	Unigene13998_All	168 1145 minus strand transaldolase [Aedes aegypti] >gi|108874520|gb|EAT38745.1| transaldolase [Aedes aegypti]	0.751	Down	0.00357	36.463
Biological Process	GO:0006418	11	tRNA aminoacylation for protein translation	0.710903	Unigene33011_All	"82 528 PREDICTED: isoleucyl-tRNA synthetase, cytoplasmic [Amphimedon queenslandica]"	0.827	Down	0.0246	17.564
Biological Process	GO:0006418	11	tRNA aminoacylation for protein translation	0.710903	Unigene13880_All	"2 757 minus strand PREDICTED: cysteinyl-tRNA synthetase, cytoplasmic-like [Nasonia vitripennis]"	0.765	Down	0.0363	29.175
Biological Process	GO:0009179	10	purine ribonucleoside diphosphate metabolic process	0.244092	Unigene9915_All	"121 1416 RecName: Full=Enolase; AltName: Full=2-phospho-D-glycerate hydro-lyase; AltName: Full=2-phosphoglycerate dehydratase >gi|157833457|pdb|1PDY|A Chain A, X-Ray Structure And Catalytic Mechanism Of Lobster Enolase >gi|157833458|pdb|1PDZ|A Chain A, X-Ray Structure And Catalytic Mechanism Of Lobster Enolase"	0.780	Down	0.002	46.625
Biological Process	GO:0009179	10	purine ribonucleoside diphosphate metabolic process	0.244092	Unigene14014_All	"90 1181 fructose 1,6-bisphosphate aldolase [Schistocerca gregaria]"	0.831	Down	0.00275	39.841
Biological Process	GO:0006869	6	lipid transport	0.445198	Unigene12587_All	22 9981 lipophorin precursor [Nilaparvata lugens]	0.649	Down	0.00216	363.65
Biological Process	GO:0006869	6	lipid transport	0.445198	Unigene6577_All	206 781 JR-1 [Riptortus clavatus]	0.436	Down	0.000352	21.332
Biological Process	GO:0044281	4	small molecule metabolic process	0.0613034	Unigene7773_All	"360 1340 minus strand PREDICTED: fructose-1,6-bisphosphatase 1-like isoform 2 [Acyrthosiphon pisum]"	0.782	Down	0.00708	35.673
Biological Process	GO:0044281	4	small molecule metabolic process	0.0613034	Unigene18208_All	"134 1579 minus strand 6-phosphogluconate dehydrogenase, decarboxylating [Acromyrmex echinatior]"	0.790	Down	0.00187	52.8
Biological Process	GO:0044281	4	small molecule metabolic process	0.0613034	Unigene9915_All	"121 1416 RecName: Full=Enolase; AltName: Full=2-phospho-D-glycerate hydro-lyase; AltName: Full=2-phosphoglycerate dehydratase >gi|157833457|pdb|1PDY|A Chain A, X-Ray Structure And Catalytic Mechanism Of Lobster Enolase >gi|157833458|pdb|1PDZ|A Chain A, X-Ray Structure And Catalytic Mechanism Of Lobster Enolase"	0.780	Down	0.002	46.625
Biological Process	GO:0044281	4	small molecule metabolic process	0.0613034	Unigene20231_All	119 1384 Threonine dehydratase catabolic [Harpegnathos saltator]	0.652	Down	0.00741	45.437
Biological Process	GO:0044281	4	small molecule metabolic process	0.0613034	Unigene14014_All	"90 1181 fructose 1,6-bisphosphate aldolase [Schistocerca gregaria]"	0.831	Down	0.00275	39.841
Biological Process	GO:0044281	4	small molecule metabolic process	0.0613034	Unigene13998_All	168 1145 minus strand transaldolase [Aedes aegypti] >gi|108874520|gb|EAT38745.1| transaldolase [Aedes aegypti]	0.751	Down	0.00357	36.463
Biological Process	GO:0044281	4	small molecule metabolic process	0.0613034	Unigene9881_All	180 1940 PREDICTED: similar to 5-aminoimidazole-4-carboxamide ribonucleotide formyltransferase/IMP cyclohydrolase [Tribolium castaneum]	0.793	Down	0.00606	64.036
Biological Process	GO:0044281	4	small molecule metabolic process	0.0613034	Unigene13880_All	"2 757 minus strand PREDICTED: cysteinyl-tRNA synthetase, cytoplasmic-like [Nasonia vitripennis]"	0.765	Down	0.0363	29.175
Biological Process	GO:0044281	4	small molecule metabolic process	0.0613034	Unigene7763_All	113 1108 Gapdh2 [Drosophila pseudoobscura pseudoobscura] >gi|115312169|sp|O44104.2|G3P2_DROPS RecName: Full=Glyceraldehyde-3-phosphate dehydrogenase 2; AltName: Full=Glyceraldehyde-3-phosphate dehydrogenase II; Short=GAPDH II >gi|54640108|gb|EAL29271.1| Gapdh2 [Drosophila pseudoobscura pseudoobscura]	0.731	Down	0.00297	35.654
Biological Process	GO:0044281	4	small molecule metabolic process	0.0613034	CL217.Contig1_All	166 1077 AGAP012261-PA [Anopheles gambiae str. PEST] >gi|55234400|gb|EAA00282.3| AGAP012261-PA [Anopheles gambiae str. PEST]	0.824	Down	0.0427	34.022
Biological Process	GO:0044281	4	small molecule metabolic process	0.0613034	Unigene33011_All	"82 528 PREDICTED: isoleucyl-tRNA synthetase, cytoplasmic [Amphimedon queenslandica]"	0.827	Down	0.0246	17.564
Biological Process	GO:0044281	4	small molecule metabolic process	0.0613034	Unigene5698_All	149 1282 minus strand PREDICTED: alcohol dehydrogenase class-3 [Apis mellifera]	0.778	Down	0.0225	40.6
Biological Process	GO:0044281	4	small molecule metabolic process	0.0613034	Unigene29886_All	16 534 Dihydroxyacetone kinase [Harpegnathos saltator]	0.671	Down	0.0123	18.377
Biological Process	GO:0072521	5	purine-containing compound metabolic process	0.479373	Unigene9915_All	"121 1416 RecName: Full=Enolase; AltName: Full=2-phospho-D-glycerate hydro-lyase; AltName: Full=2-phosphoglycerate dehydratase >gi|157833457|pdb|1PDY|A Chain A, X-Ray Structure And Catalytic Mechanism Of Lobster Enolase >gi|157833458|pdb|1PDZ|A Chain A, X-Ray Structure And Catalytic Mechanism Of Lobster Enolase"	0.780	Down	0.002	46.625
Biological Process	GO:0072521	5	purine-containing compound metabolic process	0.479373	Unigene14014_All	"90 1181 fructose 1,6-bisphosphate aldolase [Schistocerca gregaria]"	0.831	Down	0.00275	39.841
Biological Process	GO:0072521	5	purine-containing compound metabolic process	0.479373	Unigene9881_All	180 1940 PREDICTED: similar to 5-aminoimidazole-4-carboxamide ribonucleotide formyltransferase/IMP cyclohydrolase [Tribolium castaneum]	0.793	Down	0.00606	64.036
Biological Process	GO:0009205	10	purine ribonucleoside triphosphate metabolic process	0.581761	Unigene9915_All	"121 1416 RecName: Full=Enolase; AltName: Full=2-phospho-D-glycerate hydro-lyase; AltName: Full=2-phosphoglycerate dehydratase >gi|157833457|pdb|1PDY|A Chain A, X-Ray Structure And Catalytic Mechanism Of Lobster Enolase >gi|157833458|pdb|1PDZ|A Chain A, X-Ray Structure And Catalytic Mechanism Of Lobster Enolase"	0.780	Down	0.002	46.625
Biological Process	GO:0009205	10	purine ribonucleoside triphosphate metabolic process	0.581761	Unigene14014_All	"90 1181 fructose 1,6-bisphosphate aldolase [Schistocerca gregaria]"	0.831	Down	0.00275	39.841
Biological Process	GO:0006081	4	cellular aldehyde metabolic process	0.244092	Unigene18208_All	"134 1579 minus strand 6-phosphogluconate dehydrogenase, decarboxylating [Acromyrmex echinatior]"	0.790	Down	0.00187	52.8
Biological Process	GO:0006081	4	cellular aldehyde metabolic process	0.244092	Unigene13998_All	168 1145 minus strand transaldolase [Aedes aegypti] >gi|108874520|gb|EAT38745.1| transaldolase [Aedes aegypti]	0.751	Down	0.00357	36.463
Biological Process	GO:0006732	5	coenzyme metabolic process	0.118827	Unigene18208_All	"134 1579 minus strand 6-phosphogluconate dehydrogenase, decarboxylating [Acromyrmex echinatior]"	0.790	Down	0.00187	52.8
Biological Process	GO:0006732	5	coenzyme metabolic process	0.118827	Unigene9915_All	"121 1416 RecName: Full=Enolase; AltName: Full=2-phospho-D-glycerate hydro-lyase; AltName: Full=2-phosphoglycerate dehydratase >gi|157833457|pdb|1PDY|A Chain A, X-Ray Structure And Catalytic Mechanism Of Lobster Enolase >gi|157833458|pdb|1PDZ|A Chain A, X-Ray Structure And Catalytic Mechanism Of Lobster Enolase"	0.780	Down	0.002	46.625
Biological Process	GO:0006732	5	coenzyme metabolic process	0.118827	Unigene14014_All	"90 1181 fructose 1,6-bisphosphate aldolase [Schistocerca gregaria]"	0.831	Down	0.00275	39.841
Biological Process	GO:0006732	5	coenzyme metabolic process	0.118827	Unigene13998_All	168 1145 minus strand transaldolase [Aedes aegypti] >gi|108874520|gb|EAT38745.1| transaldolase [Aedes aegypti]	0.751	Down	0.00357	36.463
Biological Process	GO:0007264	7	small GTPase mediated signal transduction	0.383641	Unigene448_All	175 720 ADP-ribosylation factor [Bombyx mori] >gi|87248075|gb|ABD36090.1| ADP-ribosylation factor [Bombyx mori] >gi|357363768|gb|AET74048.1| ADP-ribosylation factor [Spodoptera exigua]	0.796	Down	0.000506	20.72
Biological Process	GO:0007264	7	small GTPase mediated signal transduction	0.383641	CL3558.Contig1_All	130 648 minus strand PREDICTED: ADP-ribosylation factor-related protein 1-like [Nasonia vitripennis]	0.824	Down	0.0293	19.617
Biological Process	GO:0007264	7	small GTPase mediated signal transduction	0.383641	Unigene17152_All	326 865 minus strand ADP-ribosylation factor 4 [Trichinella spiralis] >gi|316976817|gb|EFV60026.1| ADP-ribosylation factor 4 [Trichinella spiralis]	0.806	Down	0.0112	20.634
Biological Process	GO:0005975	4	carbohydrate metabolic process	0.000475659	Unigene7773_All	"360 1340 minus strand PREDICTED: fructose-1,6-bisphosphatase 1-like isoform 2 [Acyrthosiphon pisum]"	0.782	Down	0.00708	35.673
Biological Process	GO:0005975	4	carbohydrate metabolic process	0.000475659	Unigene12651_All	"199 2463 PREDICTED: alpha,alpha-trehalose-phosphate synthase [UDP-forming] A-like [Acyrthosiphon pisum]"	0.819	Down	0.0358	85.385
Biological Process	GO:0005975	4	carbohydrate metabolic process	0.000475659	Unigene9915_All	"121 1416 RecName: Full=Enolase; AltName: Full=2-phospho-D-glycerate hydro-lyase; AltName: Full=2-phosphoglycerate dehydratase >gi|157833457|pdb|1PDY|A Chain A, X-Ray Structure And Catalytic Mechanism Of Lobster Enolase >gi|157833458|pdb|1PDZ|A Chain A, X-Ray Structure And Catalytic Mechanism Of Lobster Enolase"	0.780	Down	0.002	46.625
Biological Process	GO:0005975	4	carbohydrate metabolic process	0.000475659	CL3932.Contig1_All	105 1331 imaginal disc growth factor [Bombus ignitus]	0.564	Down	0.00959	45.732
Biological Process	GO:0005975	4	carbohydrate metabolic process	0.000475659	Unigene14014_All	"90 1181 fructose 1,6-bisphosphate aldolase [Schistocerca gregaria]"	0.831	Down	0.00275	39.841
Biological Process	GO:0005975	4	carbohydrate metabolic process	0.000475659	Unigene13998_All	168 1145 minus strand transaldolase [Aedes aegypti] >gi|108874520|gb|EAT38745.1| transaldolase [Aedes aegypti]	0.751	Down	0.00357	36.463
Biological Process	GO:0005975	4	carbohydrate metabolic process	0.000475659	Unigene2273_All	"147 1178 minus strand PREDICTED: glycerol-3-phosphate dehydrogenase [NAD+], cytoplasmic-like [Bombus impatiens]"	0.498	Down	0.00046	37.841
Biological Process	GO:0005975	4	carbohydrate metabolic process	0.000475659	Unigene7763_All	113 1108 Gapdh2 [Drosophila pseudoobscura pseudoobscura] >gi|115312169|sp|O44104.2|G3P2_DROPS RecName: Full=Glyceraldehyde-3-phosphate dehydrogenase 2; AltName: Full=Glyceraldehyde-3-phosphate dehydrogenase II; Short=GAPDH II >gi|54640108|gb|EAL29271.1| Gapdh2 [Drosophila pseudoobscura pseudoobscura]	0.731	Down	0.00297	35.654
Biological Process	GO:0005975	4	carbohydrate metabolic process	0.000475659	CL217.Contig1_All	166 1077 AGAP012261-PA [Anopheles gambiae str. PEST] >gi|55234400|gb|EAA00282.3| AGAP012261-PA [Anopheles gambiae str. PEST]	0.824	Down	0.0427	34.022
Biological Process	GO:0005975	4	carbohydrate metabolic process	0.000475659	Unigene7760_All	55 1284 minus strand Mannose-6-phosphate isomerase [Acromyrmex echinatior]	0.796	Down	0.00446	46.843
Biological Process	GO:0005975	4	carbohydrate metabolic process	0.000475659	Unigene4562_All	20 2536 minus strand PREDICTED: LOW QUALITY PROTEIN: glycogen phosphorylase-like [Nasonia vitripennis]	0.619	Down	0.00135	96.669
Biological Process	GO:0005975	4	carbohydrate metabolic process	0.000475659	Unigene29886_All	16 534 Dihydroxyacetone kinase [Harpegnathos saltator]	0.671	Down	0.0123	18.377
Biological Process	GO:1901575	4	organic substance catabolic process	0.112314	Unigene7773_All	"360 1340 minus strand PREDICTED: fructose-1,6-bisphosphatase 1-like isoform 2 [Acyrthosiphon pisum]"	0.782	Down	0.00708	35.673
Biological Process	GO:1901575	4	organic substance catabolic process	0.112314	Unigene9915_All	"121 1416 RecName: Full=Enolase; AltName: Full=2-phospho-D-glycerate hydro-lyase; AltName: Full=2-phosphoglycerate dehydratase >gi|157833457|pdb|1PDY|A Chain A, X-Ray Structure And Catalytic Mechanism Of Lobster Enolase >gi|157833458|pdb|1PDZ|A Chain A, X-Ray Structure And Catalytic Mechanism Of Lobster Enolase"	0.780	Down	0.002	46.625
Biological Process	GO:1901575	4	organic substance catabolic process	0.112314	Unigene20231_All	119 1384 Threonine dehydratase catabolic [Harpegnathos saltator]	0.652	Down	0.00741	45.437
Biological Process	GO:1901575	4	organic substance catabolic process	0.112314	CL3932.Contig1_All	105 1331 imaginal disc growth factor [Bombus ignitus]	0.564	Down	0.00959	45.732
Biological Process	GO:1901575	4	organic substance catabolic process	0.112314	Unigene14014_All	"90 1181 fructose 1,6-bisphosphate aldolase [Schistocerca gregaria]"	0.831	Down	0.00275	39.841
Biological Process	GO:1901575	4	organic substance catabolic process	0.112314	Unigene2273_All	"147 1178 minus strand PREDICTED: glycerol-3-phosphate dehydrogenase [NAD+], cytoplasmic-like [Bombus impatiens]"	0.498	Down	0.00046	37.841
Biological Process	GO:1901575	4	organic substance catabolic process	0.112314	CL1207.Contig1_All	296 2851 minus strand PREDICTED: similar to AGAP010451-PA [Tribolium castaneum]	0.796	Down	0.0126	95.964
Biological Process	GO:0009161	9	ribonucleoside monophosphate metabolic process	0.626595	Unigene9915_All	"121 1416 RecName: Full=Enolase; AltName: Full=2-phospho-D-glycerate hydro-lyase; AltName: Full=2-phosphoglycerate dehydratase >gi|157833457|pdb|1PDY|A Chain A, X-Ray Structure And Catalytic Mechanism Of Lobster Enolase >gi|157833458|pdb|1PDZ|A Chain A, X-Ray Structure And Catalytic Mechanism Of Lobster Enolase"	0.780	Down	0.002	46.625
Biological Process	GO:0009161	9	ribonucleoside monophosphate metabolic process	0.626595	Unigene14014_All	"90 1181 fructose 1,6-bisphosphate aldolase [Schistocerca gregaria]"	0.831	Down	0.00275	39.841
Biological Process	GO:0044710	3	single-organism metabolic process	0.0196228	Unigene12651_All	"199 2463 PREDICTED: alpha,alpha-trehalose-phosphate synthase [UDP-forming] A-like [Acyrthosiphon pisum]"	0.819	Down	0.0358	85.385
Biological Process	GO:0044710	3	single-organism metabolic process	0.0196228	Unigene9915_All	"121 1416 RecName: Full=Enolase; AltName: Full=2-phospho-D-glycerate hydro-lyase; AltName: Full=2-phosphoglycerate dehydratase >gi|157833457|pdb|1PDY|A Chain A, X-Ray Structure And Catalytic Mechanism Of Lobster Enolase >gi|157833458|pdb|1PDZ|A Chain A, X-Ray Structure And Catalytic Mechanism Of Lobster Enolase"	0.780	Down	0.002	46.625
Biological Process	GO:0044710	3	single-organism metabolic process	0.0196228	Unigene20231_All	119 1384 Threonine dehydratase catabolic [Harpegnathos saltator]	0.652	Down	0.00741	45.437
Biological Process	GO:0044710	3	single-organism metabolic process	0.0196228	Unigene13998_All	168 1145 minus strand transaldolase [Aedes aegypti] >gi|108874520|gb|EAT38745.1| transaldolase [Aedes aegypti]	0.751	Down	0.00357	36.463
Biological Process	GO:0044710	3	single-organism metabolic process	0.0196228	Unigene17996_All	185 778 minus strand Mn superoxide dismutase [Bombyx mori] >gi|52421187|dbj|BAD51413.1| Mn superoxide dismutase [Bombyx mori] >gi|58429979|gb|AAW78358.1| Mn superoxide dismutase [Bombyx mori]	0.793	Down	0.0311	22.389
Biological Process	GO:0044710	3	single-organism metabolic process	0.0196228	Unigene2273_All	"147 1178 minus strand PREDICTED: glycerol-3-phosphate dehydrogenase [NAD+], cytoplasmic-like [Bombus impatiens]"	0.498	Down	0.00046	37.841
Biological Process	GO:0044710	3	single-organism metabolic process	0.0196228	Unigene9881_All	180 1940 PREDICTED: similar to 5-aminoimidazole-4-carboxamide ribonucleotide formyltransferase/IMP cyclohydrolase [Tribolium castaneum]	0.793	Down	0.00606	64.036
Biological Process	GO:0044710	3	single-organism metabolic process	0.0196228	Unigene13880_All	"2 757 minus strand PREDICTED: cysteinyl-tRNA synthetase, cytoplasmic-like [Nasonia vitripennis]"	0.765	Down	0.0363	29.175
Biological Process	GO:0044710	3	single-organism metabolic process	0.0196228	Unigene3655_All	197 955 minus strand PREDICTED: 1-acyl-sn-glycerol-3-phosphate acyltransferase alpha-like isoform 2 [Acyrthosiphon pisum] >gi|328705891|ref|XP_001950878.2| PREDICTED: 1-acyl-sn-glycerol-3-phosphate acyltransferase alpha-like isoform 1 [Acyrthosiphon pisum]	0.625	Down	0.012	28.987
Biological Process	GO:0044710	3	single-organism metabolic process	0.0196228	Unigene18209_All	76 1596 PREDICTED: probable cytochrome P450 6a14-like isoform 2 [Bombus terrestris]	0.711	Down	0.00293	58.57
Biological Process	GO:0044710	3	single-organism metabolic process	0.0196228	Unigene15092_All	217 1584 hydroxymethylglutaryl-CoA synthase 1 [Culex quinquefasciatus] >gi|167868813|gb|EDS32196.1| hydroxymethylglutaryl-CoA synthase 1 [Culex quinquefasciatus]	0.707	Down	0.00763	50.213
Biological Process	GO:0044710	3	single-organism metabolic process	0.0196228	Unigene7775_All	89 1078 GE24563 [Drosophila yakuba] >gi|194183414|gb|EDW97025.1| GE24563 [Drosophila yakuba]	0.824	Down	0.00596	36.994
Biological Process	GO:0044710	3	single-organism metabolic process	0.0196228	Unigene33011_All	"82 528 PREDICTED: isoleucyl-tRNA synthetase, cytoplasmic [Amphimedon queenslandica]"	0.827	Down	0.0246	17.564
Biological Process	GO:0044710	3	single-organism metabolic process	0.0196228	Unigene29886_All	16 534 Dihydroxyacetone kinase [Harpegnathos saltator]	0.671	Down	0.0123	18.377
Biological Process	GO:0044710	3	single-organism metabolic process	0.0196228	Unigene7773_All	"360 1340 minus strand PREDICTED: fructose-1,6-bisphosphatase 1-like isoform 2 [Acyrthosiphon pisum]"	0.782	Down	0.00708	35.673
Biological Process	GO:0044710	3	single-organism metabolic process	0.0196228	Unigene18208_All	"134 1579 minus strand 6-phosphogluconate dehydrogenase, decarboxylating [Acromyrmex echinatior]"	0.790	Down	0.00187	52.8
Biological Process	GO:0044710	3	single-organism metabolic process	0.0196228	Unigene14014_All	"90 1181 fructose 1,6-bisphosphate aldolase [Schistocerca gregaria]"	0.831	Down	0.00275	39.841
Biological Process	GO:0044710	3	single-organism metabolic process	0.0196228	Unigene1450_All	64 984 stearoyl-coa desaturase [Aedes aegypti] >gi|108880849|gb|EAT45074.1| stearoyl-coa desaturase [Aedes aegypti]	0.766	Down	0.0441	34.976
Biological Process	GO:0044710	3	single-organism metabolic process	0.0196228	Unigene7763_All	113 1108 Gapdh2 [Drosophila pseudoobscura pseudoobscura] >gi|115312169|sp|O44104.2|G3P2_DROPS RecName: Full=Glyceraldehyde-3-phosphate dehydrogenase 2; AltName: Full=Glyceraldehyde-3-phosphate dehydrogenase II; Short=GAPDH II >gi|54640108|gb|EAL29271.1| Gapdh2 [Drosophila pseudoobscura pseudoobscura]	0.731	Down	0.00297	35.654
Biological Process	GO:0044710	3	single-organism metabolic process	0.0196228	CL217.Contig1_All	166 1077 AGAP012261-PA [Anopheles gambiae str. PEST] >gi|55234400|gb|EAA00282.3| AGAP012261-PA [Anopheles gambiae str. PEST]	0.824	Down	0.0427	34.022
Biological Process	GO:0044710	3	single-organism metabolic process	0.0196228	Unigene5734_All	92 1699 cytochrome P450 [Leptinotarsa decemlineata]	0.757	Down	0.042	62.532
Biological Process	GO:0044710	3	single-organism metabolic process	0.0196228	CL1513.Contig3_All	"3 1289 minus strand PREDICTED: d-2-hydroxyglutarate dehydrogenase, mitochondrial-like [Nasonia vitripennis]"	0.832	Down	0.0317	46.935
Biological Process	GO:0044710	3	single-organism metabolic process	0.0196228	Unigene8757_All	17 1501 cytochrome P450 26B1 [Culex quinquefasciatus] >gi|167873036|gb|EDS36419.1| cytochrome P450 26B1 [Culex quinquefasciatus]	0.774	Down	0.0128	57.271
Biological Process	GO:0044710	3	single-organism metabolic process	0.0196228	Unigene5698_All	149 1282 minus strand PREDICTED: alcohol dehydrogenase class-3 [Apis mellifera]	0.778	Down	0.0225	40.6
Biological Process	GO:0044710	3	single-organism metabolic process	0.0196228	CL355.Contig1_All	3 3932 PREDICTED: fatty acid synthase-like isoform 1 [Acyrthosiphon pisum]	0.662	Down	0.00132	144.71
Biological Process	GO:0009126	9	purine nucleoside monophosphate metabolic process	0.604803	Unigene9915_All	"121 1416 RecName: Full=Enolase; AltName: Full=2-phospho-D-glycerate hydro-lyase; AltName: Full=2-phosphoglycerate dehydratase >gi|157833457|pdb|1PDY|A Chain A, X-Ray Structure And Catalytic Mechanism Of Lobster Enolase >gi|157833458|pdb|1PDZ|A Chain A, X-Ray Structure And Catalytic Mechanism Of Lobster Enolase"	0.780	Down	0.002	46.625
Biological Process	GO:0009126	9	purine nucleoside monophosphate metabolic process	0.604803	Unigene14014_All	"90 1181 fructose 1,6-bisphosphate aldolase [Schistocerca gregaria]"	0.831	Down	0.00275	39.841
Biological Process	GO:1901615	4	organic hydroxy compound metabolic process	0.244092	Unigene5698_All	149 1282 minus strand PREDICTED: alcohol dehydrogenase class-3 [Apis mellifera]	0.778	Down	0.0225	40.6
Biological Process	GO:1901615	4	organic hydroxy compound metabolic process	0.244092	Unigene29886_All	16 534 Dihydroxyacetone kinase [Harpegnathos saltator]	0.671	Down	0.0123	18.377
Biological Process	GO:0046496	10	nicotinamide nucleotide metabolic process	0.0102648	Unigene18208_All	"134 1579 minus strand 6-phosphogluconate dehydrogenase, decarboxylating [Acromyrmex echinatior]"	0.790	Down	0.00187	52.8
Biological Process	GO:0046496	10	nicotinamide nucleotide metabolic process	0.0102648	Unigene9915_All	"121 1416 RecName: Full=Enolase; AltName: Full=2-phospho-D-glycerate hydro-lyase; AltName: Full=2-phosphoglycerate dehydratase >gi|157833457|pdb|1PDY|A Chain A, X-Ray Structure And Catalytic Mechanism Of Lobster Enolase >gi|157833458|pdb|1PDZ|A Chain A, X-Ray Structure And Catalytic Mechanism Of Lobster Enolase"	0.780	Down	0.002	46.625
Biological Process	GO:0046496	10	nicotinamide nucleotide metabolic process	0.0102648	Unigene14014_All	"90 1181 fructose 1,6-bisphosphate aldolase [Schistocerca gregaria]"	0.831	Down	0.00275	39.841
Biological Process	GO:0046496	10	nicotinamide nucleotide metabolic process	0.0102648	Unigene13998_All	168 1145 minus strand transaldolase [Aedes aegypti] >gi|108874520|gb|EAT38745.1| transaldolase [Aedes aegypti]	0.751	Down	0.00357	36.463
Biological Process	GO:0009259	9	ribonucleotide metabolic process	0.693958	Unigene9915_All	"121 1416 RecName: Full=Enolase; AltName: Full=2-phospho-D-glycerate hydro-lyase; AltName: Full=2-phosphoglycerate dehydratase >gi|157833457|pdb|1PDY|A Chain A, X-Ray Structure And Catalytic Mechanism Of Lobster Enolase >gi|157833458|pdb|1PDZ|A Chain A, X-Ray Structure And Catalytic Mechanism Of Lobster Enolase"	0.780	Down	0.002	46.625
Biological Process	GO:0009259	9	ribonucleotide metabolic process	0.693958	Unigene14014_All	"90 1181 fructose 1,6-bisphosphate aldolase [Schistocerca gregaria]"	0.831	Down	0.00275	39.841
Biological Process	GO:0051156	6	glucose 6-phosphate metabolic process	0.130431	Unigene18208_All	"134 1579 minus strand 6-phosphogluconate dehydrogenase, decarboxylating [Acromyrmex echinatior]"	0.790	Down	0.00187	52.8
Biological Process	GO:0051156	6	glucose 6-phosphate metabolic process	0.130431	Unigene13998_All	168 1145 minus strand transaldolase [Aedes aegypti] >gi|108874520|gb|EAT38745.1| transaldolase [Aedes aegypti]	0.751	Down	0.00357	36.463
Biological Process	GO:1901135	4	carbohydrate derivative metabolic process	0.102705	Unigene18208_All	"134 1579 minus strand 6-phosphogluconate dehydrogenase, decarboxylating [Acromyrmex echinatior]"	0.790	Down	0.00187	52.8
Biological Process	GO:1901135	4	carbohydrate derivative metabolic process	0.102705	Unigene12008_All	95 601 GA16817 [Drosophila pseudoobscura pseudoobscura] >gi|198150655|gb|EAL29780.2| GA16817 [Drosophila pseudoobscura pseudoobscura]	0.754	Down	0.0335	17.954
Biological Process	GO:1901135	4	carbohydrate derivative metabolic process	0.102705	Unigene9915_All	"121 1416 RecName: Full=Enolase; AltName: Full=2-phospho-D-glycerate hydro-lyase; AltName: Full=2-phosphoglycerate dehydratase >gi|157833457|pdb|1PDY|A Chain A, X-Ray Structure And Catalytic Mechanism Of Lobster Enolase >gi|157833458|pdb|1PDZ|A Chain A, X-Ray Structure And Catalytic Mechanism Of Lobster Enolase"	0.780	Down	0.002	46.625
Biological Process	GO:1901135	4	carbohydrate derivative metabolic process	0.102705	CL3932.Contig1_All	105 1331 imaginal disc growth factor [Bombus ignitus]	0.564	Down	0.00959	45.732
Biological Process	GO:1901135	4	carbohydrate derivative metabolic process	0.102705	Unigene14014_All	"90 1181 fructose 1,6-bisphosphate aldolase [Schistocerca gregaria]"	0.831	Down	0.00275	39.841
Biological Process	GO:1901135	4	carbohydrate derivative metabolic process	0.102705	Unigene13998_All	168 1145 minus strand transaldolase [Aedes aegypti] >gi|108874520|gb|EAT38745.1| transaldolase [Aedes aegypti]	0.751	Down	0.00357	36.463
Biological Process	GO:1901135	4	carbohydrate derivative metabolic process	0.102705	Unigene2273_All	"147 1178 minus strand PREDICTED: glycerol-3-phosphate dehydrogenase [NAD+], cytoplasmic-like [Bombus impatiens]"	0.498	Down	0.00046	37.841
Biological Process	GO:1901135	4	carbohydrate derivative metabolic process	0.102705	Unigene7760_All	55 1284 minus strand Mannose-6-phosphate isomerase [Acromyrmex echinatior]	0.796	Down	0.00446	46.843
Biological Process	GO:1901136	5	carbohydrate derivative catabolic process	0.504412	CL3932.Contig1_All	105 1331 imaginal disc growth factor [Bombus ignitus]	0.564	Down	0.00959	45.732
Biological Process	GO:1901136	5	carbohydrate derivative catabolic process	0.504412	Unigene2273_All	"147 1178 minus strand PREDICTED: glycerol-3-phosphate dehydrogenase [NAD+], cytoplasmic-like [Bombus impatiens]"	0.498	Down	0.00046	37.841
Biological Process	GO:0009141	8	nucleoside triphosphate metabolic process	0.615851	Unigene9915_All	"121 1416 RecName: Full=Enolase; AltName: Full=2-phospho-D-glycerate hydro-lyase; AltName: Full=2-phosphoglycerate dehydratase >gi|157833457|pdb|1PDY|A Chain A, X-Ray Structure And Catalytic Mechanism Of Lobster Enolase >gi|157833458|pdb|1PDZ|A Chain A, X-Ray Structure And Catalytic Mechanism Of Lobster Enolase"	0.780	Down	0.002	46.625
Biological Process	GO:0009141	8	nucleoside triphosphate metabolic process	0.615851	Unigene14014_All	"90 1181 fructose 1,6-bisphosphate aldolase [Schistocerca gregaria]"	0.831	Down	0.00275	39.841
Biological Process	GO:0010876	4	lipid localization	0.475626	Unigene12587_All	22 9981 lipophorin precursor [Nilaparvata lugens]	0.649	Down	0.00216	363.65
Biological Process	GO:0010876	4	lipid localization	0.475626	Unigene6577_All	206 781 JR-1 [Riptortus clavatus]	0.436	Down	0.000352	21.332
Biological Process	GO:0006163	9	purine nucleotide metabolic process	0.363601	Unigene9915_All	"121 1416 RecName: Full=Enolase; AltName: Full=2-phospho-D-glycerate hydro-lyase; AltName: Full=2-phosphoglycerate dehydratase >gi|157833457|pdb|1PDY|A Chain A, X-Ray Structure And Catalytic Mechanism Of Lobster Enolase >gi|157833458|pdb|1PDZ|A Chain A, X-Ray Structure And Catalytic Mechanism Of Lobster Enolase"	0.780	Down	0.002	46.625
Biological Process	GO:0006163	9	purine nucleotide metabolic process	0.363601	Unigene14014_All	"90 1181 fructose 1,6-bisphosphate aldolase [Schistocerca gregaria]"	0.831	Down	0.00275	39.841
Biological Process	GO:0006163	9	purine nucleotide metabolic process	0.363601	Unigene9881_All	180 1940 PREDICTED: similar to 5-aminoimidazole-4-carboxamide ribonucleotide formyltransferase/IMP cyclohydrolase [Tribolium castaneum]	0.793	Down	0.00606	64.036
Biological Process	GO:0043038	9	amino acid activation	0.719026	Unigene33011_All	"82 528 PREDICTED: isoleucyl-tRNA synthetase, cytoplasmic [Amphimedon queenslandica]"	0.827	Down	0.0246	17.564
Biological Process	GO:0043038	9	amino acid activation	0.719026	Unigene13880_All	"2 757 minus strand PREDICTED: cysteinyl-tRNA synthetase, cytoplasmic-like [Nasonia vitripennis]"	0.765	Down	0.0363	29.175
Biological Process	GO:0019637	5	organophosphate metabolic process	0.0634326	Unigene18208_All	"134 1579 minus strand 6-phosphogluconate dehydrogenase, decarboxylating [Acromyrmex echinatior]"	0.790	Down	0.00187	52.8
Biological Process	GO:0019637	5	organophosphate metabolic process	0.0634326	Unigene9915_All	"121 1416 RecName: Full=Enolase; AltName: Full=2-phospho-D-glycerate hydro-lyase; AltName: Full=2-phosphoglycerate dehydratase >gi|157833457|pdb|1PDY|A Chain A, X-Ray Structure And Catalytic Mechanism Of Lobster Enolase >gi|157833458|pdb|1PDZ|A Chain A, X-Ray Structure And Catalytic Mechanism Of Lobster Enolase"	0.780	Down	0.002	46.625
Biological Process	GO:0019637	5	organophosphate metabolic process	0.0634326	Unigene14014_All	"90 1181 fructose 1,6-bisphosphate aldolase [Schistocerca gregaria]"	0.831	Down	0.00275	39.841
Biological Process	GO:0019637	5	organophosphate metabolic process	0.0634326	Unigene13998_All	168 1145 minus strand transaldolase [Aedes aegypti] >gi|108874520|gb|EAT38745.1| transaldolase [Aedes aegypti]	0.751	Down	0.00357	36.463
Biological Process	GO:0019637	5	organophosphate metabolic process	0.0634326	Unigene2273_All	"147 1178 minus strand PREDICTED: glycerol-3-phosphate dehydrogenase [NAD+], cytoplasmic-like [Bombus impatiens]"	0.498	Down	0.00046	37.841
Biological Process	GO:0019637	5	organophosphate metabolic process	0.0634326	Unigene9881_All	180 1940 PREDICTED: similar to 5-aminoimidazole-4-carboxamide ribonucleotide formyltransferase/IMP cyclohydrolase [Tribolium castaneum]	0.793	Down	0.00606	64.036
Biological Process	GO:0019637	5	organophosphate metabolic process	0.0634326	Unigene3655_All	197 955 minus strand PREDICTED: 1-acyl-sn-glycerol-3-phosphate acyltransferase alpha-like isoform 2 [Acyrthosiphon pisum] >gi|328705891|ref|XP_001950878.2| PREDICTED: 1-acyl-sn-glycerol-3-phosphate acyltransferase alpha-like isoform 1 [Acyrthosiphon pisum]	0.625	Down	0.012	28.987
Biological Process	GO:0009123	8	nucleoside monophosphate metabolic process	0.626595	Unigene9915_All	"121 1416 RecName: Full=Enolase; AltName: Full=2-phospho-D-glycerate hydro-lyase; AltName: Full=2-phosphoglycerate dehydratase >gi|157833457|pdb|1PDY|A Chain A, X-Ray Structure And Catalytic Mechanism Of Lobster Enolase >gi|157833458|pdb|1PDZ|A Chain A, X-Ray Structure And Catalytic Mechanism Of Lobster Enolase"	0.780	Down	0.002	46.625
Biological Process	GO:0009123	8	nucleoside monophosphate metabolic process	0.626595	Unigene14014_All	"90 1181 fructose 1,6-bisphosphate aldolase [Schistocerca gregaria]"	0.831	Down	0.00275	39.841
Biological Process	GO:0019318	7	hexose metabolic process	0.0778522	Unigene7773_All	"360 1340 minus strand PREDICTED: fructose-1,6-bisphosphatase 1-like isoform 2 [Acyrthosiphon pisum]"	0.782	Down	0.00708	35.673
Biological Process	GO:0019318	7	hexose metabolic process	0.0778522	Unigene7763_All	113 1108 Gapdh2 [Drosophila pseudoobscura pseudoobscura] >gi|115312169|sp|O44104.2|G3P2_DROPS RecName: Full=Glyceraldehyde-3-phosphate dehydrogenase 2; AltName: Full=Glyceraldehyde-3-phosphate dehydrogenase II; Short=GAPDH II >gi|54640108|gb|EAL29271.1| Gapdh2 [Drosophila pseudoobscura pseudoobscura]	0.731	Down	0.00297	35.654
Biological Process	GO:0019318	7	hexose metabolic process	0.0778522	CL217.Contig1_All	166 1077 AGAP012261-PA [Anopheles gambiae str. PEST] >gi|55234400|gb|EAA00282.3| AGAP012261-PA [Anopheles gambiae str. PEST]	0.824	Down	0.0427	34.022
Biological Process	GO:0006757	12	ATP generation from ADP	0.244092	Unigene9915_All	"121 1416 RecName: Full=Enolase; AltName: Full=2-phospho-D-glycerate hydro-lyase; AltName: Full=2-phosphoglycerate dehydratase >gi|157833457|pdb|1PDY|A Chain A, X-Ray Structure And Catalytic Mechanism Of Lobster Enolase >gi|157833458|pdb|1PDZ|A Chain A, X-Ray Structure And Catalytic Mechanism Of Lobster Enolase"	0.780	Down	0.002	46.625
Biological Process	GO:0006757	12	ATP generation from ADP	0.244092	Unigene14014_All	"90 1181 fructose 1,6-bisphosphate aldolase [Schistocerca gregaria]"	0.831	Down	0.00275	39.841
Biological Process	GO:0006739	11	NADP metabolic process	0.130431	Unigene18208_All	"134 1579 minus strand 6-phosphogluconate dehydrogenase, decarboxylating [Acromyrmex echinatior]"	0.790	Down	0.00187	52.8
Biological Process	GO:0006739	11	NADP metabolic process	0.130431	Unigene13998_All	168 1145 minus strand transaldolase [Aedes aegypti] >gi|108874520|gb|EAT38745.1| transaldolase [Aedes aegypti]	0.751	Down	0.00357	36.463
Biological Process	GO:0042278	8	purine nucleoside metabolic process	0.710903	Unigene9915_All	"121 1416 RecName: Full=Enolase; AltName: Full=2-phospho-D-glycerate hydro-lyase; AltName: Full=2-phosphoglycerate dehydratase >gi|157833457|pdb|1PDY|A Chain A, X-Ray Structure And Catalytic Mechanism Of Lobster Enolase >gi|157833458|pdb|1PDZ|A Chain A, X-Ray Structure And Catalytic Mechanism Of Lobster Enolase"	0.780	Down	0.002	46.625
Biological Process	GO:0042278	8	purine nucleoside metabolic process	0.710903	Unigene14014_All	"90 1181 fructose 1,6-bisphosphate aldolase [Schistocerca gregaria]"	0.831	Down	0.00275	39.841
Biological Process	GO:0046031	11	ADP metabolic process	0.244092	Unigene9915_All	"121 1416 RecName: Full=Enolase; AltName: Full=2-phospho-D-glycerate hydro-lyase; AltName: Full=2-phosphoglycerate dehydratase >gi|157833457|pdb|1PDY|A Chain A, X-Ray Structure And Catalytic Mechanism Of Lobster Enolase >gi|157833458|pdb|1PDZ|A Chain A, X-Ray Structure And Catalytic Mechanism Of Lobster Enolase"	0.780	Down	0.002	46.625
Biological Process	GO:0046031	11	ADP metabolic process	0.244092	Unigene14014_All	"90 1181 fructose 1,6-bisphosphate aldolase [Schistocerca gregaria]"	0.831	Down	0.00275	39.841
Biological Process	GO:0009167	10	purine ribonucleoside monophosphate metabolic process	0.604803	Unigene9915_All	"121 1416 RecName: Full=Enolase; AltName: Full=2-phospho-D-glycerate hydro-lyase; AltName: Full=2-phosphoglycerate dehydratase >gi|157833457|pdb|1PDY|A Chain A, X-Ray Structure And Catalytic Mechanism Of Lobster Enolase >gi|157833458|pdb|1PDZ|A Chain A, X-Ray Structure And Catalytic Mechanism Of Lobster Enolase"	0.780	Down	0.002	46.625
Biological Process	GO:0009167	10	purine ribonucleoside monophosphate metabolic process	0.604803	Unigene14014_All	"90 1181 fructose 1,6-bisphosphate aldolase [Schistocerca gregaria]"	0.831	Down	0.00275	39.841
Biological Process	GO:0009117	8	nucleotide metabolic process	0.11961	Unigene18208_All	"134 1579 minus strand 6-phosphogluconate dehydrogenase, decarboxylating [Acromyrmex echinatior]"	0.790	Down	0.00187	52.8
Biological Process	GO:0009117	8	nucleotide metabolic process	0.11961	Unigene9915_All	"121 1416 RecName: Full=Enolase; AltName: Full=2-phospho-D-glycerate hydro-lyase; AltName: Full=2-phosphoglycerate dehydratase >gi|157833457|pdb|1PDY|A Chain A, X-Ray Structure And Catalytic Mechanism Of Lobster Enolase >gi|157833458|pdb|1PDZ|A Chain A, X-Ray Structure And Catalytic Mechanism Of Lobster Enolase"	0.780	Down	0.002	46.625
Biological Process	GO:0009117	8	nucleotide metabolic process	0.11961	Unigene14014_All	"90 1181 fructose 1,6-bisphosphate aldolase [Schistocerca gregaria]"	0.831	Down	0.00275	39.841
Biological Process	GO:0009117	8	nucleotide metabolic process	0.11961	Unigene13998_All	168 1145 minus strand transaldolase [Aedes aegypti] >gi|108874520|gb|EAT38745.1| transaldolase [Aedes aegypti]	0.751	Down	0.00357	36.463
Biological Process	GO:0009117	8	nucleotide metabolic process	0.11961	Unigene9881_All	180 1940 PREDICTED: similar to 5-aminoimidazole-4-carboxamide ribonucleotide formyltransferase/IMP cyclohydrolase [Tribolium castaneum]	0.793	Down	0.00606	64.036
Biological Process	GO:0046939	9	nucleotide phosphorylation	0.265003	Unigene9915_All	"121 1416 RecName: Full=Enolase; AltName: Full=2-phospho-D-glycerate hydro-lyase; AltName: Full=2-phosphoglycerate dehydratase >gi|157833457|pdb|1PDY|A Chain A, X-Ray Structure And Catalytic Mechanism Of Lobster Enolase >gi|157833458|pdb|1PDZ|A Chain A, X-Ray Structure And Catalytic Mechanism Of Lobster Enolase"	0.780	Down	0.002	46.625
Biological Process	GO:0046939	9	nucleotide phosphorylation	0.265003	Unigene14014_All	"90 1181 fructose 1,6-bisphosphate aldolase [Schistocerca gregaria]"	0.831	Down	0.00275	39.841
Biological Process	GO:0009135	9	purine nucleoside diphosphate metabolic process	0.244092	Unigene9915_All	"121 1416 RecName: Full=Enolase; AltName: Full=2-phospho-D-glycerate hydro-lyase; AltName: Full=2-phosphoglycerate dehydratase >gi|157833457|pdb|1PDY|A Chain A, X-Ray Structure And Catalytic Mechanism Of Lobster Enolase >gi|157833458|pdb|1PDZ|A Chain A, X-Ray Structure And Catalytic Mechanism Of Lobster Enolase"	0.780	Down	0.002	46.625
Biological Process	GO:0009135	9	purine nucleoside diphosphate metabolic process	0.244092	Unigene14014_All	"90 1181 fructose 1,6-bisphosphate aldolase [Schistocerca gregaria]"	0.831	Down	0.00275	39.841
Biological Process	GO:0072524	5	pyridine-containing compound metabolic process	0.0162284	Unigene18208_All	"134 1579 minus strand 6-phosphogluconate dehydrogenase, decarboxylating [Acromyrmex echinatior]"	0.790	Down	0.00187	52.8
Biological Process	GO:0072524	5	pyridine-containing compound metabolic process	0.0162284	Unigene9915_All	"121 1416 RecName: Full=Enolase; AltName: Full=2-phospho-D-glycerate hydro-lyase; AltName: Full=2-phosphoglycerate dehydratase >gi|157833457|pdb|1PDY|A Chain A, X-Ray Structure And Catalytic Mechanism Of Lobster Enolase >gi|157833458|pdb|1PDZ|A Chain A, X-Ray Structure And Catalytic Mechanism Of Lobster Enolase"	0.780	Down	0.002	46.625
Biological Process	GO:0072524	5	pyridine-containing compound metabolic process	0.0162284	Unigene14014_All	"90 1181 fructose 1,6-bisphosphate aldolase [Schistocerca gregaria]"	0.831	Down	0.00275	39.841
Biological Process	GO:0072524	5	pyridine-containing compound metabolic process	0.0162284	Unigene13998_All	168 1145 minus strand transaldolase [Aedes aegypti] >gi|108874520|gb|EAT38745.1| transaldolase [Aedes aegypti]	0.751	Down	0.00357	36.463
Biological Process	GO:0006753	7	nucleoside phosphate metabolic process	0.129191	Unigene18208_All	"134 1579 minus strand 6-phosphogluconate dehydrogenase, decarboxylating [Acromyrmex echinatior]"	0.790	Down	0.00187	52.8
Biological Process	GO:0006753	7	nucleoside phosphate metabolic process	0.129191	Unigene9915_All	"121 1416 RecName: Full=Enolase; AltName: Full=2-phospho-D-glycerate hydro-lyase; AltName: Full=2-phosphoglycerate dehydratase >gi|157833457|pdb|1PDY|A Chain A, X-Ray Structure And Catalytic Mechanism Of Lobster Enolase >gi|157833458|pdb|1PDZ|A Chain A, X-Ray Structure And Catalytic Mechanism Of Lobster Enolase"	0.780	Down	0.002	46.625
Biological Process	GO:0006753	7	nucleoside phosphate metabolic process	0.129191	Unigene14014_All	"90 1181 fructose 1,6-bisphosphate aldolase [Schistocerca gregaria]"	0.831	Down	0.00275	39.841
Biological Process	GO:0006753	7	nucleoside phosphate metabolic process	0.129191	Unigene13998_All	168 1145 minus strand transaldolase [Aedes aegypti] >gi|108874520|gb|EAT38745.1| transaldolase [Aedes aegypti]	0.751	Down	0.00357	36.463
Biological Process	GO:0006753	7	nucleoside phosphate metabolic process	0.129191	Unigene9881_All	180 1940 PREDICTED: similar to 5-aminoimidazole-4-carboxamide ribonucleotide formyltransferase/IMP cyclohydrolase [Tribolium castaneum]	0.793	Down	0.00606	64.036
Biological Process	GO:0006030	7	chitin metabolic process	0.693958	Unigene12008_All	95 601 GA16817 [Drosophila pseudoobscura pseudoobscura] >gi|198150655|gb|EAL29780.2| GA16817 [Drosophila pseudoobscura pseudoobscura]	0.754	Down	0.0335	17.954
Biological Process	GO:0006030	7	chitin metabolic process	0.693958	CL3932.Contig1_All	105 1331 imaginal disc growth factor [Bombus ignitus]	0.564	Down	0.00959	45.732
Biological Process	GO:0006733	6	oxidoreduction coenzyme metabolic process	0.0185674	Unigene18208_All	"134 1579 minus strand 6-phosphogluconate dehydrogenase, decarboxylating [Acromyrmex echinatior]"	0.790	Down	0.00187	52.8
Biological Process	GO:0006733	6	oxidoreduction coenzyme metabolic process	0.0185674	Unigene9915_All	"121 1416 RecName: Full=Enolase; AltName: Full=2-phospho-D-glycerate hydro-lyase; AltName: Full=2-phosphoglycerate dehydratase >gi|157833457|pdb|1PDY|A Chain A, X-Ray Structure And Catalytic Mechanism Of Lobster Enolase >gi|157833458|pdb|1PDZ|A Chain A, X-Ray Structure And Catalytic Mechanism Of Lobster Enolase"	0.780	Down	0.002	46.625
Biological Process	GO:0006733	6	oxidoreduction coenzyme metabolic process	0.0185674	Unigene14014_All	"90 1181 fructose 1,6-bisphosphate aldolase [Schistocerca gregaria]"	0.831	Down	0.00275	39.841
Biological Process	GO:0006733	6	oxidoreduction coenzyme metabolic process	0.0185674	Unigene13998_All	168 1145 minus strand transaldolase [Aedes aegypti] >gi|108874520|gb|EAT38745.1| transaldolase [Aedes aegypti]	0.751	Down	0.00357	36.463
Biological Process	GO:0009199	9	ribonucleoside triphosphate metabolic process	0.593442	Unigene9915_All	"121 1416 RecName: Full=Enolase; AltName: Full=2-phospho-D-glycerate hydro-lyase; AltName: Full=2-phosphoglycerate dehydratase >gi|157833457|pdb|1PDY|A Chain A, X-Ray Structure And Catalytic Mechanism Of Lobster Enolase >gi|157833458|pdb|1PDZ|A Chain A, X-Ray Structure And Catalytic Mechanism Of Lobster Enolase"	0.780	Down	0.002	46.625
Biological Process	GO:0009199	9	ribonucleoside triphosphate metabolic process	0.593442	Unigene14014_All	"90 1181 fructose 1,6-bisphosphate aldolase [Schistocerca gregaria]"	0.831	Down	0.00275	39.841
Biological Process	GO:0016052	5	carbohydrate catabolic process	0.0349743	Unigene7773_All	"360 1340 minus strand PREDICTED: fructose-1,6-bisphosphatase 1-like isoform 2 [Acyrthosiphon pisum]"	0.782	Down	0.00708	35.673
Biological Process	GO:0016052	5	carbohydrate catabolic process	0.0349743	Unigene9915_All	"121 1416 RecName: Full=Enolase; AltName: Full=2-phospho-D-glycerate hydro-lyase; AltName: Full=2-phosphoglycerate dehydratase >gi|157833457|pdb|1PDY|A Chain A, X-Ray Structure And Catalytic Mechanism Of Lobster Enolase >gi|157833458|pdb|1PDZ|A Chain A, X-Ray Structure And Catalytic Mechanism Of Lobster Enolase"	0.780	Down	0.002	46.625
Biological Process	GO:0016052	5	carbohydrate catabolic process	0.0349743	Unigene14014_All	"90 1181 fructose 1,6-bisphosphate aldolase [Schistocerca gregaria]"	0.831	Down	0.00275	39.841
Biological Process	GO:0051186	4	cofactor metabolic process	0.212944	Unigene18208_All	"134 1579 minus strand 6-phosphogluconate dehydrogenase, decarboxylating [Acromyrmex echinatior]"	0.790	Down	0.00187	52.8
Biological Process	GO:0051186	4	cofactor metabolic process	0.212944	Unigene9915_All	"121 1416 RecName: Full=Enolase; AltName: Full=2-phospho-D-glycerate hydro-lyase; AltName: Full=2-phosphoglycerate dehydratase >gi|157833457|pdb|1PDY|A Chain A, X-Ray Structure And Catalytic Mechanism Of Lobster Enolase >gi|157833458|pdb|1PDZ|A Chain A, X-Ray Structure And Catalytic Mechanism Of Lobster Enolase"	0.780	Down	0.002	46.625
Biological Process	GO:0051186	4	cofactor metabolic process	0.212944	Unigene14014_All	"90 1181 fructose 1,6-bisphosphate aldolase [Schistocerca gregaria]"	0.831	Down	0.00275	39.841
Biological Process	GO:0051186	4	cofactor metabolic process	0.212944	Unigene13998_All	168 1145 minus strand transaldolase [Aedes aegypti] >gi|108874520|gb|EAT38745.1| transaldolase [Aedes aegypti]	0.751	Down	0.00357	36.463
Biological Process	GO:0044723	5	single-organism carbohydrate metabolic process	0.000472219	Unigene7773_All	"360 1340 minus strand PREDICTED: fructose-1,6-bisphosphatase 1-like isoform 2 [Acyrthosiphon pisum]"	0.782	Down	0.00708	35.673
Biological Process	GO:0044723	5	single-organism carbohydrate metabolic process	0.000472219	Unigene12651_All	"199 2463 PREDICTED: alpha,alpha-trehalose-phosphate synthase [UDP-forming] A-like [Acyrthosiphon pisum]"	0.819	Down	0.0358	85.385
Biological Process	GO:0044723	5	single-organism carbohydrate metabolic process	0.000472219	Unigene9915_All	"121 1416 RecName: Full=Enolase; AltName: Full=2-phospho-D-glycerate hydro-lyase; AltName: Full=2-phosphoglycerate dehydratase >gi|157833457|pdb|1PDY|A Chain A, X-Ray Structure And Catalytic Mechanism Of Lobster Enolase >gi|157833458|pdb|1PDZ|A Chain A, X-Ray Structure And Catalytic Mechanism Of Lobster Enolase"	0.780	Down	0.002	46.625
Biological Process	GO:0044723	5	single-organism carbohydrate metabolic process	0.000472219	Unigene14014_All	"90 1181 fructose 1,6-bisphosphate aldolase [Schistocerca gregaria]"	0.831	Down	0.00275	39.841
Biological Process	GO:0044723	5	single-organism carbohydrate metabolic process	0.000472219	Unigene29886_All	16 534 Dihydroxyacetone kinase [Harpegnathos saltator]	0.671	Down	0.0123	18.377
Biological Process	GO:0044723	5	single-organism carbohydrate metabolic process	0.000472219	Unigene7763_All	113 1108 Gapdh2 [Drosophila pseudoobscura pseudoobscura] >gi|115312169|sp|O44104.2|G3P2_DROPS RecName: Full=Glyceraldehyde-3-phosphate dehydrogenase 2; AltName: Full=Glyceraldehyde-3-phosphate dehydrogenase II; Short=GAPDH II >gi|54640108|gb|EAL29271.1| Gapdh2 [Drosophila pseudoobscura pseudoobscura]	0.731	Down	0.00297	35.654
Biological Process	GO:0044723	5	single-organism carbohydrate metabolic process	0.000472219	CL217.Contig1_All	166 1077 AGAP012261-PA [Anopheles gambiae str. PEST] >gi|55234400|gb|EAA00282.3| AGAP012261-PA [Anopheles gambiae str. PEST]	0.824	Down	0.0427	34.022
Biological Process	GO:1901071	6	glucosamine-containing compound metabolic process	0.70255	Unigene12008_All	95 601 GA16817 [Drosophila pseudoobscura pseudoobscura] >gi|198150655|gb|EAL29780.2| GA16817 [Drosophila pseudoobscura pseudoobscura]	0.754	Down	0.0335	17.954
Biological Process	GO:1901071	6	glucosamine-containing compound metabolic process	0.70255	CL3932.Contig1_All	105 1331 imaginal disc growth factor [Bombus ignitus]	0.564	Down	0.00959	45.732
Biological Process	GO:0043039	10	tRNA aminoacylation	0.719026	Unigene33011_All	"82 528 PREDICTED: isoleucyl-tRNA synthetase, cytoplasmic [Amphimedon queenslandica]"	0.827	Down	0.0246	17.564
Biological Process	GO:0043039	10	tRNA aminoacylation	0.719026	Unigene13880_All	"2 757 minus strand PREDICTED: cysteinyl-tRNA synthetase, cytoplasmic-like [Nasonia vitripennis]"	0.765	Down	0.0363	29.175
Biological Process	GO:0006090	9	pyruvate metabolic process	0.305134	Unigene9915_All	"121 1416 RecName: Full=Enolase; AltName: Full=2-phospho-D-glycerate hydro-lyase; AltName: Full=2-phosphoglycerate dehydratase >gi|157833457|pdb|1PDY|A Chain A, X-Ray Structure And Catalytic Mechanism Of Lobster Enolase >gi|157833458|pdb|1PDZ|A Chain A, X-Ray Structure And Catalytic Mechanism Of Lobster Enolase"	0.780	Down	0.002	46.625
Biological Process	GO:0006090	9	pyruvate metabolic process	0.305134	Unigene14014_All	"90 1181 fructose 1,6-bisphosphate aldolase [Schistocerca gregaria]"	0.831	Down	0.00275	39.841
Biological Process	GO:0019682	6	glyceraldehyde-3-phosphate metabolic process	0.130431	Unigene18208_All	"134 1579 minus strand 6-phosphogluconate dehydrogenase, decarboxylating [Acromyrmex echinatior]"	0.790	Down	0.00187	52.8
Biological Process	GO:0019682	6	glyceraldehyde-3-phosphate metabolic process	0.130431	Unigene13998_All	168 1145 minus strand transaldolase [Aedes aegypti] >gi|108874520|gb|EAT38745.1| transaldolase [Aedes aegypti]	0.751	Down	0.00357	36.463
Biological Process	GO:0005996	6	monosaccharide metabolic process	0.0860739	Unigene7773_All	"360 1340 minus strand PREDICTED: fructose-1,6-bisphosphatase 1-like isoform 2 [Acyrthosiphon pisum]"	0.782	Down	0.00708	35.673
Biological Process	GO:0005996	6	monosaccharide metabolic process	0.0860739	Unigene7763_All	113 1108 Gapdh2 [Drosophila pseudoobscura pseudoobscura] >gi|115312169|sp|O44104.2|G3P2_DROPS RecName: Full=Glyceraldehyde-3-phosphate dehydrogenase 2; AltName: Full=Glyceraldehyde-3-phosphate dehydrogenase II; Short=GAPDH II >gi|54640108|gb|EAL29271.1| Gapdh2 [Drosophila pseudoobscura pseudoobscura]	0.731	Down	0.00297	35.654
Biological Process	GO:0005996	6	monosaccharide metabolic process	0.0860739	CL217.Contig1_All	166 1077 AGAP012261-PA [Anopheles gambiae str. PEST] >gi|55234400|gb|EAA00282.3| AGAP012261-PA [Anopheles gambiae str. PEST]	0.824	Down	0.0427	34.022
Biological Process	GO:0009144	9	purine nucleoside triphosphate metabolic process	0.581761	Unigene9915_All	"121 1416 RecName: Full=Enolase; AltName: Full=2-phospho-D-glycerate hydro-lyase; AltName: Full=2-phosphoglycerate dehydratase >gi|157833457|pdb|1PDY|A Chain A, X-Ray Structure And Catalytic Mechanism Of Lobster Enolase >gi|157833458|pdb|1PDZ|A Chain A, X-Ray Structure And Catalytic Mechanism Of Lobster Enolase"	0.780	Down	0.002	46.625
Biological Process	GO:0009144	9	purine nucleoside triphosphate metabolic process	0.581761	Unigene14014_All	"90 1181 fructose 1,6-bisphosphate aldolase [Schistocerca gregaria]"	0.831	Down	0.00275	39.841
Biological Process	GO:0055086	6	nucleobase-containing small molecule metabolic process	0.258124	Unigene18208_All	"134 1579 minus strand 6-phosphogluconate dehydrogenase, decarboxylating [Acromyrmex echinatior]"	0.790	Down	0.00187	52.8
Biological Process	GO:0055086	6	nucleobase-containing small molecule metabolic process	0.258124	Unigene9915_All	"121 1416 RecName: Full=Enolase; AltName: Full=2-phospho-D-glycerate hydro-lyase; AltName: Full=2-phosphoglycerate dehydratase >gi|157833457|pdb|1PDY|A Chain A, X-Ray Structure And Catalytic Mechanism Of Lobster Enolase >gi|157833458|pdb|1PDZ|A Chain A, X-Ray Structure And Catalytic Mechanism Of Lobster Enolase"	0.780	Down	0.002	46.625
Biological Process	GO:0055086	6	nucleobase-containing small molecule metabolic process	0.258124	Unigene14014_All	"90 1181 fructose 1,6-bisphosphate aldolase [Schistocerca gregaria]"	0.831	Down	0.00275	39.841
Biological Process	GO:0055086	6	nucleobase-containing small molecule metabolic process	0.258124	Unigene13998_All	168 1145 minus strand transaldolase [Aedes aegypti] >gi|108874520|gb|EAT38745.1| transaldolase [Aedes aegypti]	0.751	Down	0.00357	36.463
Biological Process	GO:0055086	6	nucleobase-containing small molecule metabolic process	0.258124	Unigene9881_All	180 1940 PREDICTED: similar to 5-aminoimidazole-4-carboxamide ribonucleotide formyltransferase/IMP cyclohydrolase [Tribolium castaneum]	0.793	Down	0.00606	64.036
Biological Process	GO:0006022	5	aminoglycan metabolic process	0.710903	Unigene12008_All	95 601 GA16817 [Drosophila pseudoobscura pseudoobscura] >gi|198150655|gb|EAL29780.2| GA16817 [Drosophila pseudoobscura pseudoobscura]	0.754	Down	0.0335	17.954
Biological Process	GO:0006022	5	aminoglycan metabolic process	0.710903	CL3932.Contig1_All	105 1331 imaginal disc growth factor [Bombus ignitus]	0.564	Down	0.00959	45.732
Biological Process	GO:0009132	8	nucleoside diphosphate metabolic process	0.285346	Unigene9915_All	"121 1416 RecName: Full=Enolase; AltName: Full=2-phospho-D-glycerate hydro-lyase; AltName: Full=2-phosphoglycerate dehydratase >gi|157833457|pdb|1PDY|A Chain A, X-Ray Structure And Catalytic Mechanism Of Lobster Enolase >gi|157833458|pdb|1PDZ|A Chain A, X-Ray Structure And Catalytic Mechanism Of Lobster Enolase"	0.780	Down	0.002	46.625
Biological Process	GO:0009132	8	nucleoside diphosphate metabolic process	0.285346	Unigene14014_All	"90 1181 fructose 1,6-bisphosphate aldolase [Schistocerca gregaria]"	0.831	Down	0.00275	39.841
Biological Process	GO:0046034	11	ATP metabolic process	0.557398	Unigene9915_All	"121 1416 RecName: Full=Enolase; AltName: Full=2-phospho-D-glycerate hydro-lyase; AltName: Full=2-phosphoglycerate dehydratase >gi|157833457|pdb|1PDY|A Chain A, X-Ray Structure And Catalytic Mechanism Of Lobster Enolase >gi|157833458|pdb|1PDZ|A Chain A, X-Ray Structure And Catalytic Mechanism Of Lobster Enolase"	0.780	Down	0.002	46.625
Biological Process	GO:0046034	11	ATP metabolic process	0.557398	Unigene14014_All	"90 1181 fructose 1,6-bisphosphate aldolase [Schistocerca gregaria]"	0.831	Down	0.00275	39.841
Biological Process	GO:0044724	6	single-organism carbohydrate catabolic process	0.0349743	Unigene7773_All	"360 1340 minus strand PREDICTED: fructose-1,6-bisphosphatase 1-like isoform 2 [Acyrthosiphon pisum]"	0.782	Down	0.00708	35.673
Biological Process	GO:0044724	6	single-organism carbohydrate catabolic process	0.0349743	Unigene9915_All	"121 1416 RecName: Full=Enolase; AltName: Full=2-phospho-D-glycerate hydro-lyase; AltName: Full=2-phosphoglycerate dehydratase >gi|157833457|pdb|1PDY|A Chain A, X-Ray Structure And Catalytic Mechanism Of Lobster Enolase >gi|157833458|pdb|1PDZ|A Chain A, X-Ray Structure And Catalytic Mechanism Of Lobster Enolase"	0.780	Down	0.002	46.625
Biological Process	GO:0044724	6	single-organism carbohydrate catabolic process	0.0349743	Unigene14014_All	"90 1181 fructose 1,6-bisphosphate aldolase [Schistocerca gregaria]"	0.831	Down	0.00275	39.841
Biological Process	GO:0035556	6	intracellular signal transduction	0.451536	Unigene448_All	175 720 ADP-ribosylation factor [Bombyx mori] >gi|87248075|gb|ABD36090.1| ADP-ribosylation factor [Bombyx mori] >gi|357363768|gb|AET74048.1| ADP-ribosylation factor [Spodoptera exigua]	0.796	Down	0.000506	20.72
Biological Process	GO:0035556	6	intracellular signal transduction	0.451536	CL3558.Contig1_All	130 648 minus strand PREDICTED: ADP-ribosylation factor-related protein 1-like [Nasonia vitripennis]	0.824	Down	0.0293	19.617
Biological Process	GO:0035556	6	intracellular signal transduction	0.451536	Unigene17152_All	326 865 minus strand ADP-ribosylation factor 4 [Trichinella spiralis] >gi|316976817|gb|EFV60026.1| ADP-ribosylation factor 4 [Trichinella spiralis]	0.806	Down	0.0112	20.634
Biological Process	GO:0044712	4	single-organism catabolic process	0.112843	Unigene7773_All	"360 1340 minus strand PREDICTED: fructose-1,6-bisphosphatase 1-like isoform 2 [Acyrthosiphon pisum]"	0.782	Down	0.00708	35.673
Biological Process	GO:0044712	4	single-organism catabolic process	0.112843	Unigene9915_All	"121 1416 RecName: Full=Enolase; AltName: Full=2-phospho-D-glycerate hydro-lyase; AltName: Full=2-phosphoglycerate dehydratase >gi|157833457|pdb|1PDY|A Chain A, X-Ray Structure And Catalytic Mechanism Of Lobster Enolase >gi|157833458|pdb|1PDZ|A Chain A, X-Ray Structure And Catalytic Mechanism Of Lobster Enolase"	0.780	Down	0.002	46.625
Biological Process	GO:0044712	4	single-organism catabolic process	0.112843	Unigene20231_All	119 1384 Threonine dehydratase catabolic [Harpegnathos saltator]	0.652	Down	0.00741	45.437
Biological Process	GO:0044712	4	single-organism catabolic process	0.112843	Unigene14014_All	"90 1181 fructose 1,6-bisphosphate aldolase [Schistocerca gregaria]"	0.831	Down	0.00275	39.841
Biological Process	GO:0044282	5	small molecule catabolic process	0.504412	Unigene7773_All	"360 1340 minus strand PREDICTED: fructose-1,6-bisphosphatase 1-like isoform 2 [Acyrthosiphon pisum]"	0.782	Down	0.00708	35.673
Biological Process	GO:0044282	5	small molecule catabolic process	0.504412	Unigene20231_All	119 1384 Threonine dehydratase catabolic [Harpegnathos saltator]	0.652	Down	0.00741	45.437
Biological Process	GO:0046128	9	purine ribonucleoside metabolic process	0.710903	Unigene9915_All	"121 1416 RecName: Full=Enolase; AltName: Full=2-phospho-D-glycerate hydro-lyase; AltName: Full=2-phosphoglycerate dehydratase >gi|157833457|pdb|1PDY|A Chain A, X-Ray Structure And Catalytic Mechanism Of Lobster Enolase >gi|157833458|pdb|1PDZ|A Chain A, X-Ray Structure And Catalytic Mechanism Of Lobster Enolase"	0.780	Down	0.002	46.625
Biological Process	GO:0046128	9	purine ribonucleoside metabolic process	0.710903	Unigene14014_All	"90 1181 fructose 1,6-bisphosphate aldolase [Schistocerca gregaria]"	0.831	Down	0.00275	39.841
Biological Process	GO:1901565	5	organonitrogen compound catabolic process	0.615851	Unigene20231_All	119 1384 Threonine dehydratase catabolic [Harpegnathos saltator]	0.652	Down	0.00741	45.437
Biological Process	GO:1901565	5	organonitrogen compound catabolic process	0.615851	CL3932.Contig1_All	105 1331 imaginal disc growth factor [Bombus ignitus]	0.564	Down	0.00959	45.732
Biological Process	GO:0006040	5	amino sugar metabolic process	0.70255	Unigene12008_All	95 601 GA16817 [Drosophila pseudoobscura pseudoobscura] >gi|198150655|gb|EAL29780.2| GA16817 [Drosophila pseudoobscura pseudoobscura]	0.754	Down	0.0335	17.954
Biological Process	GO:0006040	5	amino sugar metabolic process	0.70255	CL3932.Contig1_All	105 1331 imaginal disc growth factor [Bombus ignitus]	0.564	Down	0.00959	45.732
Biological Process	GO:0009150	10	purine ribonucleotide metabolic process	0.676037	Unigene9915_All	"121 1416 RecName: Full=Enolase; AltName: Full=2-phospho-D-glycerate hydro-lyase; AltName: Full=2-phosphoglycerate dehydratase >gi|157833457|pdb|1PDY|A Chain A, X-Ray Structure And Catalytic Mechanism Of Lobster Enolase >gi|157833458|pdb|1PDZ|A Chain A, X-Ray Structure And Catalytic Mechanism Of Lobster Enolase"	0.780	Down	0.002	46.625
Biological Process	GO:0009150	10	purine ribonucleotide metabolic process	0.676037	Unigene14014_All	"90 1181 fructose 1,6-bisphosphate aldolase [Schistocerca gregaria]"	0.831	Down	0.00275	39.841
Biological Process	GO:0009056	3	catabolic process	0.115672	Unigene7773_All	"360 1340 minus strand PREDICTED: fructose-1,6-bisphosphatase 1-like isoform 2 [Acyrthosiphon pisum]"	0.782	Down	0.00708	35.673
Biological Process	GO:0009056	3	catabolic process	0.115672	Unigene9915_All	"121 1416 RecName: Full=Enolase; AltName: Full=2-phospho-D-glycerate hydro-lyase; AltName: Full=2-phosphoglycerate dehydratase >gi|157833457|pdb|1PDY|A Chain A, X-Ray Structure And Catalytic Mechanism Of Lobster Enolase >gi|157833458|pdb|1PDZ|A Chain A, X-Ray Structure And Catalytic Mechanism Of Lobster Enolase"	0.780	Down	0.002	46.625
Biological Process	GO:0009056	3	catabolic process	0.115672	Unigene20231_All	119 1384 Threonine dehydratase catabolic [Harpegnathos saltator]	0.652	Down	0.00741	45.437
Biological Process	GO:0009056	3	catabolic process	0.115672	CL3932.Contig1_All	105 1331 imaginal disc growth factor [Bombus ignitus]	0.564	Down	0.00959	45.732
Biological Process	GO:0009056	3	catabolic process	0.115672	Unigene14014_All	"90 1181 fructose 1,6-bisphosphate aldolase [Schistocerca gregaria]"	0.831	Down	0.00275	39.841
Biological Process	GO:0009056	3	catabolic process	0.115672	Unigene2273_All	"147 1178 minus strand PREDICTED: glycerol-3-phosphate dehydrogenase [NAD+], cytoplasmic-like [Bombus impatiens]"	0.498	Down	0.00046	37.841
Biological Process	GO:0009056	3	catabolic process	0.115672	CL1207.Contig1_All	296 2851 minus strand PREDICTED: similar to AGAP010451-PA [Tribolium castaneum]	0.796	Down	0.0126	95.964
