# Supplementary material for: Differential Proteomics Analysis Unraveled Mechanisms of Arma chinensis Responding to Improved Artificial Diet
Source: Insects. 2022 Jul 2;13(7):605. doi: 10.3390/insects13070605 (PMC9319121; doi:10.3390/insects13070605)
Supplement: Supplementary file 1 [file insects-13-00605-s001.zip › Supplementary Table S8.xlsx]

## Sheet: Up GO2Protein
Table S8. GO enrichment for the up-regulated DEPs in IADN/COSMN.
GO Terms Level 1	GO Terms ID	GO Terms Level	GO Terms Description	Fisher's exact test P value	Protein accession	Protein description	IADN/COSMN Ratio	Regulated Type	IADN/COSMN P value	MW [kDa]
Cellular Component	GO:0044421	3	extracellular region part	0.296002	Unigene32074_All	3 674 minus strand albumin [Sus scrofa domesticus]	3.836	Up	0.00635	25.238
Cellular Component	GO:0044421	3	extracellular region part	0.296002	Unigene28901_All	2 229 minus strand albumin [Sus scrofa]	5.731	Up	0.0312	8.5354
Cellular Component	GO:0044815	3	DNA packaging complex	0.224987	Unigene11729_All	79 675 truncated histone H1 [Triatoma infestans]	1.462	Up	0.0257	19.993
Cellular Component	GO:0044815	3	DNA packaging complex	0.224987	Unigene201_All	251 655 PREDICTED: histone H4 [Equus caballus]	1.376	Up	0.0247	15.259
Cellular Component	GO:0044430	8	cytoskeletal part	0.210309	CL1969.Contig3_All	88 1353 troponin I protein [Lethocerus indicus]	1.437	Up	0.00122	46.521
Cellular Component	GO:0044430	8	cytoskeletal part	0.210309	CL4456.Contig2_All	314 1294 minus strand PREDICTED: troponin T-like isoform 4 [Acyrthosiphon pisum]	1.417	Up	0.0026	38.931
Cellular Component	GO:0044430	8	cytoskeletal part	0.210309	Unigene2153_All	3 2522 minus strand PREDICTED: neither inactivation nor afterpotential protein C [Nasonia vitripennis]	1.511	Up	0.0103	97.239
Cellular Component	GO:0044430	8	cytoskeletal part	0.210309	Unigene16237_All	130 990 F-actin-capping protein subunit alpha [Camponotus floridanus]	1.203	Up	0.0147	32.949
Cellular Component	GO:0005576	2	extracellular region	0.278802	Unigene14085_All	295 1368 Endochitinase [Harpegnathos saltator]	1.255	Up	0.0288	39.295
Cellular Component	GO:0005576	2	extracellular region	0.278802	Unigene14133_All	37 726 cuticular protein analogous to peritrophins 3-A1 precursor [Tribolium castaneum] >gi|268309018|gb|ACY95475.1| cuticular protein analogous to peritrophins 3-A1 [Tribolium castaneum]	1.370	Up	0.0266	25.705
Cellular Component	GO:0005576	2	extracellular region	0.278802	Unigene32074_All	3 674 minus strand albumin [Sus scrofa domesticus]	3.836	Up	0.00635	25.238
Cellular Component	GO:0005576	2	extracellular region	0.278802	Unigene28901_All	2 229 minus strand albumin [Sus scrofa]	5.731	Up	0.0312	8.5354
Cellular Component	GO:0000786	11	nucleosome	0.224987	Unigene11729_All	79 675 truncated histone H1 [Triatoma infestans]	1.462	Up	0.0257	19.993
Cellular Component	GO:0000786	11	nucleosome	0.224987	Unigene201_All	251 655 PREDICTED: histone H4 [Equus caballus]	1.376	Up	0.0247	15.259
Cellular Component	GO:0000785	10	chromatin	0.224987	Unigene11729_All	79 675 truncated histone H1 [Triatoma infestans]	1.462	Up	0.0257	19.993
Cellular Component	GO:0000785	10	chromatin	0.224987	Unigene201_All	251 655 PREDICTED: histone H4 [Equus caballus]	1.376	Up	0.0247	15.259
Cellular Component	GO:0044449	9	contractile fiber part	0.0909369	CL1969.Contig3_All	88 1353 troponin I protein [Lethocerus indicus]	1.437	Up	0.00122	46.521
Cellular Component	GO:0044449	9	contractile fiber part	0.0909369	CL4456.Contig2_All	314 1294 minus strand PREDICTED: troponin T-like isoform 4 [Acyrthosiphon pisum]	1.417	Up	0.0026	38.931
Cellular Component	GO:0005615	4	extracellular space	0.17384	Unigene32074_All	3 674 minus strand albumin [Sus scrofa domesticus]	3.836	Up	0.00635	25.238
Cellular Component	GO:0005615	4	extracellular space	0.17384	Unigene28901_All	2 229 minus strand albumin [Sus scrofa]	5.731	Up	0.0312	8.5354
Cellular Component	GO:0030016	9	myofibril	0.0909369	CL1969.Contig3_All	88 1353 troponin I protein [Lethocerus indicus]	1.437	Up	0.00122	46.521
Cellular Component	GO:0030016	9	myofibril	0.0909369	CL4456.Contig2_All	314 1294 minus strand PREDICTED: troponin T-like isoform 4 [Acyrthosiphon pisum]	1.417	Up	0.0026	38.931
Cellular Component	GO:0005861	12	troponin complex	0.0909369	CL1969.Contig3_All	88 1353 troponin I protein [Lethocerus indicus]	1.437	Up	0.00122	46.521
Cellular Component	GO:0005861	12	troponin complex	0.0909369	CL4456.Contig2_All	314 1294 minus strand PREDICTED: troponin T-like isoform 4 [Acyrthosiphon pisum]	1.417	Up	0.0026	38.931
Cellular Component	GO:0044427	9	chromosomal part	0.249397	Unigene11729_All	79 675 truncated histone H1 [Triatoma infestans]	1.462	Up	0.0257	19.993
Cellular Component	GO:0044427	9	chromosomal part	0.249397	Unigene201_All	251 655 PREDICTED: histone H4 [Equus caballus]	1.376	Up	0.0247	15.259
Cellular Component	GO:0005856	2	cytoskeleton	0.367302	CL1969.Contig3_All	88 1353 troponin I protein [Lethocerus indicus]	1.437	Up	0.00122	46.521
Cellular Component	GO:0005856	2	cytoskeleton	0.367302	CL4456.Contig2_All	314 1294 minus strand PREDICTED: troponin T-like isoform 4 [Acyrthosiphon pisum]	1.417	Up	0.0026	38.931
Cellular Component	GO:0005856	2	cytoskeleton	0.367302	Unigene2153_All	3 2522 minus strand PREDICTED: neither inactivation nor afterpotential protein C [Nasonia vitripennis]	1.511	Up	0.0103	97.239
Cellular Component	GO:0005856	2	cytoskeleton	0.367302	Unigene16237_All	130 990 F-actin-capping protein subunit alpha [Camponotus floridanus]	1.203	Up	0.0147	32.949
Cellular Component	GO:0005694	8	chromosome	0.360695	Unigene11729_All	79 675 truncated histone H1 [Triatoma infestans]	1.462	Up	0.0257	19.993
Cellular Component	GO:0005694	8	chromosome	0.360695	Unigene201_All	251 655 PREDICTED: histone H4 [Equus caballus]	1.376	Up	0.0247	15.259
Cellular Component	GO:0043292	8	contractile fiber	0.0909369	CL1969.Contig3_All	88 1353 troponin I protein [Lethocerus indicus]	1.437	Up	0.00122	46.521
Cellular Component	GO:0043292	8	contractile fiber	0.0909369	CL4456.Contig2_All	314 1294 minus strand PREDICTED: troponin T-like isoform 4 [Acyrthosiphon pisum]	1.417	Up	0.0026	38.931
Cellular Component	GO:0005865	11	striated muscle thin filament	0.0909369	CL1969.Contig3_All	88 1353 troponin I protein [Lethocerus indicus]	1.437	Up	0.00122	46.521
Cellular Component	GO:0005865	11	striated muscle thin filament	0.0909369	CL4456.Contig2_All	314 1294 minus strand PREDICTED: troponin T-like isoform 4 [Acyrthosiphon pisum]	1.417	Up	0.0026	38.931
Cellular Component	GO:0032993	3	protein-DNA complex	0.224987	Unigene11729_All	79 675 truncated histone H1 [Triatoma infestans]	1.462	Up	0.0257	19.993
Cellular Component	GO:0032993	3	protein-DNA complex	0.224987	Unigene201_All	251 655 PREDICTED: histone H4 [Equus caballus]	1.376	Up	0.0247	15.259
Cellular Component	GO:0015629	3	actin cytoskeleton	0.058343	CL1969.Contig3_All	88 1353 troponin I protein [Lethocerus indicus]	1.437	Up	0.00122	46.521
Cellular Component	GO:0015629	3	actin cytoskeleton	0.058343	CL4456.Contig2_All	314 1294 minus strand PREDICTED: troponin T-like isoform 4 [Acyrthosiphon pisum]	1.417	Up	0.0026	38.931
Cellular Component	GO:0015629	3	actin cytoskeleton	0.058343	Unigene2153_All	3 2522 minus strand PREDICTED: neither inactivation nor afterpotential protein C [Nasonia vitripennis]	1.511	Up	0.0103	97.239
Cellular Component	GO:0015629	3	actin cytoskeleton	0.058343	Unigene16237_All	130 990 F-actin-capping protein subunit alpha [Camponotus floridanus]	1.203	Up	0.0147	32.949
Cellular Component	GO:0036379	10	myofilament	0.0909369	CL1969.Contig3_All	88 1353 troponin I protein [Lethocerus indicus]	1.437	Up	0.00122	46.521
Cellular Component	GO:0036379	10	myofilament	0.0909369	CL4456.Contig2_All	314 1294 minus strand PREDICTED: troponin T-like isoform 4 [Acyrthosiphon pisum]	1.417	Up	0.0026	38.931
Cellular Component	GO:0030017	10	sarcomere	0.0909369	CL1969.Contig3_All	88 1353 troponin I protein [Lethocerus indicus]	1.437	Up	0.00122	46.521
Cellular Component	GO:0030017	10	sarcomere	0.0909369	CL4456.Contig2_All	314 1294 minus strand PREDICTED: troponin T-like isoform 4 [Acyrthosiphon pisum]	1.417	Up	0.0026	38.931
Molecular Function	GO:0008233	4	peptidase activity	3.37362e-05	Unigene1485_All	67 1440 PREDICTED: lysosomal Pro-X carboxypeptidase-like [Acyrthosiphon pisum]	1.547	Up	0.00112	51.627
Molecular Function	GO:0008233	4	peptidase activity	3.37362e-05	Unigene16075_All	173 1174 minus strand cathepsin L-like cysteine protease 2 [Plautia stali]	1.483	Up	0.00615	37.586
Molecular Function	GO:0008233	4	peptidase activity	3.37362e-05	Unigene18412_All	2 424 Serine proteinase stubble [Camponotus floridanus]	1.378	Up	0.0284	15.632
Molecular Function	GO:0008233	4	peptidase activity	3.37362e-05	CL1335.Contig2_All	123 1127 GH22826 [Drosophila grimshawi] >gi|193899288|gb|EDV98154.1| GH22826 [Drosophila grimshawi]	1.747	Up	0.0449	37.454
Molecular Function	GO:0008233	4	peptidase activity	3.37362e-05	Unigene10829_All	"51 1607 26,29 kDa proteinase-like cysteine protease [Plautia stali]"	1.553	Up	0.00411	58.6
Molecular Function	GO:0008233	4	peptidase activity	3.37362e-05	Unigene1577_All	53 862 minus strand trypsin precursor LlSgP3 [Lygus lineolaris]	1.553	Up	0.00322	29.989
Molecular Function	GO:0008233	4	peptidase activity	3.37362e-05	Unigene20396_All	2 721 trypsin precursor LlSgP4 [Lygus lineolaris]	1.445	Up	0.0342	26.721
Molecular Function	GO:0008233	4	peptidase activity	3.37362e-05	Unigene25864_All	3 767 minus strand Aminopeptidase N [Harpegnathos saltator]	1.202	Up	0.0465	29.413
Molecular Function	GO:0008233	4	peptidase activity	3.37362e-05	CL515.Contig1_All	5 706 minus strand trypsin precursor LlSgP3 [Lygus lineolaris]	1.389	Up	0.0189	25.644
Molecular Function	GO:0008233	4	peptidase activity	3.37362e-05	Unigene18257_All	90 848 minus strand trypsin-like protease [Ranatra unicolor]	1.579	Up	0.00106	28.034
Molecular Function	GO:0008233	4	peptidase activity	3.37362e-05	CL4079.Contig2_All	1 1044 PREDICTED: cathepsin O-like [Apis mellifera]	1.214	Up	0.0104	39.632
Molecular Function	GO:0008233	4	peptidase activity	3.37362e-05	Unigene14000_All	69 1217 minus strand molting fluid carboxypeptidase A precursor [Bombyx mori] >gi|54114893|dbj|BAD60916.1| molting fluid carboxypeptidase A [Bombyx mori]	1.559	Up	0.00146	43.859
Molecular Function	GO:0008233	4	peptidase activity	3.37362e-05	Unigene8582_All	20 1189 PREDICTED: serine protease snake-like [Bombus impatiens]	1.856	Up	0.0406	42.675
Molecular Function	GO:0008233	4	peptidase activity	3.37362e-05	CL1077.Contig1_All	"1089 2804 minus strand Transmembrane protease, serine 9 [Harpegnathos saltator]"	1.244	Up	0.015	61.858
Molecular Function	GO:0008233	4	peptidase activity	3.37362e-05	Unigene3411_All	2 721 minus strand trypsin precursor LlSgP4 [Lygus lineolaris]	1.404	Up	0.000218	26.811
Molecular Function	GO:0008233	4	peptidase activity	3.37362e-05	Unigene14063_All	139 1575 minus strand PREDICTED: xaa-Pro dipeptidase-like [Bombus terrestris]	1.475	Up	0.00195	54.519
Molecular Function	GO:0008233	4	peptidase activity	3.37362e-05	Unigene18213_All	29 1417 minus strand PREDICTED: venom serine carboxypeptidase-like [Bombus terrestris]	1.595	Up	0.0204	52.784
Molecular Function	GO:0008233	4	peptidase activity	3.37362e-05	Unigene14979_All	300 1508 venom serine carboxypeptidase [Danaus plexippus]	1.444	Up	0.0316	45.807
Molecular Function	GO:0008233	4	peptidase activity	3.37362e-05	CL3794.Contig2_All	76 906 trypsin precursor LlGtP1 [Lygus lineolaris]	1.540	Up	0.0022	30.773
Molecular Function	GO:0008233	4	peptidase activity	3.37362e-05	Unigene14038_All	126 1337 tick legumain [Haemaphysalis longicornis]	2.843	Up	0.00418	45.682
Molecular Function	GO:0008233	4	peptidase activity	3.37362e-05	Unigene3337_All	19 894 gluten hydrolyzing proteinase [Eurygaster integriceps]	2.590	Up	0.015	31.512
Molecular Function	GO:0008233	4	peptidase activity	3.37362e-05	Unigene12443_All	1 396 minus strand PREDICTED: cathepsin L-like [Oreochromis niloticus]	2.735	Up	0.00231	14.238
Molecular Function	GO:0008233	4	peptidase activity	3.37362e-05	Unigene11900_All	2 547 serine protease [Laccotrephes japonensis]	1.229	Up	0.0172	19.828
Molecular Function	GO:0008233	4	peptidase activity	3.37362e-05	CL184.Contig3_All	103 984 minus strand secreted salivary trypsin [Triatoma matogrossensis]	2.170	Up	0.00485	32.214
Molecular Function	GO:0008233	4	peptidase activity	3.37362e-05	Unigene284_All	1 1197 PREDICTED: similar to oligopeptidase [Tribolium castaneum]	1.237	Up	0.002	46.065
Molecular Function	GO:0008233	4	peptidase activity	3.37362e-05	Unigene13889_All	1 714 minus strand trypsin-like protease [Ranatra unicolor]	1.340	Up	0.00921	26.457
Molecular Function	GO:0008233	4	peptidase activity	3.37362e-05	CL5255.Contig2_All	70 1101 cathepsin L-like cysteine protease 1 [Plautia stali]	1.767	Up	0.00761	38.57
Molecular Function	GO:0008233	4	peptidase activity	3.37362e-05	Unigene18171_All	96 1094 minus strand cathepsin b [Aedes aegypti] >gi|54289254|gb|AAV31917.1| lysosomal cathepsin B [Aedes aegypti] >gi|108874249|gb|EAT38474.1| cathepsin b [Aedes aegypti]	1.693	Up	0.00769	36.55
Molecular Function	GO:0008233	4	peptidase activity	3.37362e-05	Unigene9896_All	240 1625 PREDICTED: similar to thymus-specific serine protease [Tribolium castaneum]	1.612	Up	0.0025	52.646
Molecular Function	GO:0008233	4	peptidase activity	3.37362e-05	Unigene4120_All	4 351 salivary trypsin [Triatoma infestans]	1.314	Up	0.0456	12.709
Molecular Function	GO:0008233	4	peptidase activity	3.37362e-05	Unigene5660_All	58 1467 minus strand PREDICTED: similar to trypsin-like serine protease [Tribolium castaneum]	1.546	Up	0.0195	51.273
Molecular Function	GO:0008233	4	peptidase activity	3.37362e-05	CL272.Contig6_All	32 1012 minus strand cathepsin L-like proteinase [Triatoma brasiliensis]	1.338	Up	0.0249	35.999
Molecular Function	GO:0008233	4	peptidase activity	3.37362e-05	Unigene1580_All	90 1082 minus strand cathepsin B [Branchiostoma belcheri tsingtauense]	2.446	Up	0.00759	35.94
Molecular Function	GO:0008233	4	peptidase activity	3.37362e-05	Unigene2476_All	9 2690 minus strand Neurotrypsin [Camponotus floridanus]	1.318	Up	0.000327	98.5
Molecular Function	GO:0005319	4	lipid transporter activity	0.308846	Unigene10798_All	1 2433 vitellogenin [Lethocerus deyrollei]	1.291	Up	0.0282	93.247
Molecular Function	GO:0005319	4	lipid transporter activity	0.308846	Unigene18963_All	39 1007 minus strand vitellogenin [Trigonotylus caelestialium]	1.244	Up	0.00603	37.493
Molecular Function	GO:0005319	4	lipid transporter activity	0.308846	Unigene4622_All	133 2895 minus strand PREDICTED: vitellogenin-6-like [Acyrthosiphon pisum]	1.204	Up	0.00966	105.01
Molecular Function	GO:0008199	8	ferric iron binding	0.0338853	Unigene17997_All	92 793 minus strand ferritin subunit (glycosylated) [Nilaparvata lugens]	1.635	Up	0.00124	26.496
Molecular Function	GO:0008199	8	ferric iron binding	0.0338853	Unigene9695_All	373 897 minus strand PREDICTED: ferritin subunit-like [Bombus impatiens]	1.563	Up	0.0154	20.212
Molecular Function	GO:0008199	8	ferric iron binding	0.0338853	Unigene1596_All	185 700 ferritin [Triatoma infestans]	3.397	Up	0.000992	19.469
Molecular Function	GO:0004497	4	monooxygenase activity	0.00218918	Unigene18206_All	130 1602 PREDICTED: similar to cytochrome P450 [Tribolium castaneum]	1.490	Up	0.00515	56.677
Molecular Function	GO:0004497	4	monooxygenase activity	0.00218918	Unigene18209_All	76 1596 PREDICTED: probable cytochrome P450 6a14-like isoform 2 [Bombus terrestris]	1.215	Up	0.00779	58.57
Molecular Function	GO:0004497	4	monooxygenase activity	0.00218918	Unigene131_All	211 1482 Uncharacterized aarF domain-containing protein kinase 1 [Camponotus floridanus]	1.292	Up	0.0228	47.001
Molecular Function	GO:0004497	4	monooxygenase activity	0.00218918	Unigene1483_All	133 1569 PREDICTED: cytochrome P450 6a2-like [Bombus impatiens]	1.402	Up	0.00371	55.123
Molecular Function	GO:0004497	4	monooxygenase activity	0.00218918	CL3702.Contig1_All	256 1623 minus strand PREDICTED: similar to cytochrome P450 [Tribolium castaneum]	1.469	Up	0.00281	52.65
Molecular Function	GO:0004497	4	monooxygenase activity	0.00218918	Unigene3691_All	37 1200 minus strand dimethylaniline monooxygenase 5 [Culex quinquefasciatus] >gi|167875553|gb|EDS38936.1| dimethylaniline monooxygenase 5 [Culex quinquefasciatus]	1.223	Up	0.02	45.292
Molecular Function	GO:0051540	3	metal cluster binding	0.526843	Unigene10512_All	2 3025 minus strand Putative glutamate synthase [NADPH] [Harpegnathos saltator]	1.472	Up	0.000853	109.7
Molecular Function	GO:0051540	3	metal cluster binding	0.526843	Unigene14646_All	35 4117 minus strand PREDICTED: xanthine dehydrogenase-like [Bombus terrestris]	1.201	Up	0.00947	150.96
Molecular Function	GO:0051540	3	metal cluster binding	0.526843	CL595.Contig1_All	22 3018 minus strand PREDICTED: dihydropyrimidine dehydrogenase [NADP+]-like isoform 1 [Apis mellifera]	1.395	Up	0.00185	109.55
Molecular Function	GO:0016709	5	oxidoreductase activity, acting on paired donors, with incorporation or reduction of molecular oxygen, NAD(P)H as one donor, and incorporation of one atom of oxygen	0.319534	Unigene131_All	211 1482 Uncharacterized aarF domain-containing protein kinase 1 [Camponotus floridanus]	1.292	Up	0.0228	47.001
Molecular Function	GO:0016709	5	oxidoreductase activity, acting on paired donors, with incorporation or reduction of molecular oxygen, NAD(P)H as one donor, and incorporation of one atom of oxygen	0.319534	Unigene3691_All	37 1200 minus strand dimethylaniline monooxygenase 5 [Culex quinquefasciatus] >gi|167875553|gb|EDS38936.1| dimethylaniline monooxygenase 5 [Culex quinquefasciatus]	1.223	Up	0.02	45.292
Molecular Function	GO:0016209	2	antioxidant activity	0.284781	Unigene14067_All	66 1544 catalase [Schistocerca gregaria]	1.291	Up	0.0103	55.613
Molecular Function	GO:0016209	2	antioxidant activity	0.284781	Unigene14958_All	206 616 Cu/Zn superoxide dismutase [Cavia porcellus]	1.870	Up	0.024	14.147
Molecular Function	GO:0016209	2	antioxidant activity	0.284781	Unigene4258_All	335 1672 minus strand GJ17765 [Drosophila virilis] >gi|194149265|gb|EDW64963.1| GJ17765 [Drosophila virilis]	1.227	Up	0.00714	51.489
Molecular Function	GO:0016209	2	antioxidant activity	0.284781	Unigene11805_All	217 678 superoxide dismutase [Triatoma infestans]	1.311	Up	0.0318	15.832
Molecular Function	GO:0016705	4	oxidoreductase activity, acting on paired donors, with incorporation or reduction of molecular oxygen	1.28274e-10	Unigene14700_All	93 1583 minus strand cytochrome P450 CYP6AX1 protein [Nilaparvata lugens]	1.404	Up	0.0488	57.202
Molecular Function	GO:0016705	4	oxidoreductase activity, acting on paired donors, with incorporation or reduction of molecular oxygen	1.28274e-10	CL2752.Contig2_All	63 1547 cytochrome P450 monooxygenase CYP6X1v1 [Lygus lineolaris]	2.624	Up	0.00165	57.102
Molecular Function	GO:0016705	4	oxidoreductase activity, acting on paired donors, with incorporation or reduction of molecular oxygen	1.28274e-10	Unigene3691_All	37 1200 minus strand dimethylaniline monooxygenase 5 [Culex quinquefasciatus] >gi|167875553|gb|EDS38936.1| dimethylaniline monooxygenase 5 [Culex quinquefasciatus]	1.223	Up	0.02	45.292
Molecular Function	GO:0016705	4	oxidoreductase activity, acting on paired donors, with incorporation or reduction of molecular oxygen	1.28274e-10	Unigene20256_All	78 1526 cytochrome P450 CYP397A1V2 [Cimex lectularius]	1.462	Up	0.00685	55.796
Molecular Function	GO:0016705	4	oxidoreductase activity, acting on paired donors, with incorporation or reduction of molecular oxygen	1.28274e-10	Unigene18209_All	76 1596 PREDICTED: probable cytochrome P450 6a14-like isoform 2 [Bombus terrestris]	1.215	Up	0.00779	58.57
Molecular Function	GO:0016705	4	oxidoreductase activity, acting on paired donors, with incorporation or reduction of molecular oxygen	1.28274e-10	Unigene12673_All	106 1587 minus strand cytochrome P450 monooxygenase CYP6X1v1 [Lygus lineolaris]	1.568	Up	0.00488	57.101
Molecular Function	GO:0016705	4	oxidoreductase activity, acting on paired donors, with incorporation or reduction of molecular oxygen	1.28274e-10	Unigene20257_All	241 1761 minus strand cytochrome P450 CYP6AX1 protein [Nilaparvata lugens]	1.775	Up	0.00642	58.215
Molecular Function	GO:0016705	4	oxidoreductase activity, acting on paired donors, with incorporation or reduction of molecular oxygen	1.28274e-10	Unigene131_All	211 1482 Uncharacterized aarF domain-containing protein kinase 1 [Camponotus floridanus]	1.292	Up	0.0228	47.001
Molecular Function	GO:0016705	4	oxidoreductase activity, acting on paired donors, with incorporation or reduction of molecular oxygen	1.28274e-10	CL1001.Contig1_All	127 1665 cytochrome P450 4A6 [Culex quinquefasciatus] >gi|167881331|gb|EDS44714.1| cytochrome P450 4A6 [Culex quinquefasciatus]	1.336	Up	0.0101	59.313
Molecular Function	GO:0016705	4	oxidoreductase activity, acting on paired donors, with incorporation or reduction of molecular oxygen	1.28274e-10	CL1278.Contig1_All	103 1569 RecName: Full=Cytochrome P450 4C1; AltName: Full=CYPIVC1 >gi|155947|gb|AAA27819.1| cytochrome P450 [Blaberus discoidalis]	1.912	Up	0.0252	55.826
Molecular Function	GO:0016705	4	oxidoreductase activity, acting on paired donors, with incorporation or reduction of molecular oxygen	1.28274e-10	CL3790.Contig3_All	47 1576 minus strand cytochrome P450 6BQ2 [Tribolium castaneum]	2.013	Up	0.00792	59.483
Molecular Function	GO:0016705	4	oxidoreductase activity, acting on paired donors, with incorporation or reduction of molecular oxygen	1.28274e-10	CL3790.Contig1_All	2 1237 minus strand cytochrome P450 [Aedes aegypti] >gi|108874803|gb|EAT39028.1| cytochrome P450 [Aedes aegypti]	2.128	Up	8.57e-05	48.455
Molecular Function	GO:0016705	4	oxidoreductase activity, acting on paired donors, with incorporation or reduction of molecular oxygen	1.28274e-10	Unigene1450_All	64 984 stearoyl-coa desaturase [Aedes aegypti] >gi|108880849|gb|EAT45074.1| stearoyl-coa desaturase [Aedes aegypti]	1.281	Up	0.0138	34.976
Molecular Function	GO:0016705	4	oxidoreductase activity, acting on paired donors, with incorporation or reduction of molecular oxygen	1.28274e-10	CL1936.Contig1_All	6 1436 CYP4CE1 protein [Nilaparvata lugens]	1.719	Up	0.0196	54.836
Molecular Function	GO:0016705	4	oxidoreductase activity, acting on paired donors, with incorporation or reduction of molecular oxygen	1.28274e-10	CL3702.Contig1_All	256 1623 minus strand PREDICTED: similar to cytochrome P450 [Tribolium castaneum]	1.469	Up	0.00281	52.65
Molecular Function	GO:0016705	4	oxidoreductase activity, acting on paired donors, with incorporation or reduction of molecular oxygen	1.28274e-10	Unigene18206_All	130 1602 PREDICTED: similar to cytochrome P450 [Tribolium castaneum]	1.490	Up	0.00515	56.677
Molecular Function	GO:0016705	4	oxidoreductase activity, acting on paired donors, with incorporation or reduction of molecular oxygen	1.28274e-10	Unigene5734_All	92 1699 cytochrome P450 [Leptinotarsa decemlineata]	1.573	Up	0.0412	62.532
Molecular Function	GO:0016705	4	oxidoreductase activity, acting on paired donors, with incorporation or reduction of molecular oxygen	1.28274e-10	Unigene1483_All	133 1569 PREDICTED: cytochrome P450 6a2-like [Bombus impatiens]	1.402	Up	0.00371	55.123
Molecular Function	GO:0016705	4	oxidoreductase activity, acting on paired donors, with incorporation or reduction of molecular oxygen	1.28274e-10	CL1830.Contig1_All	165 1670 cytochrome P450 monooxygenase CYP6X1v1 [Lygus lineolaris]	1.586	Up	0.0423	58.03
Molecular Function	GO:0016705	4	oxidoreductase activity, acting on paired donors, with incorporation or reduction of molecular oxygen	1.28274e-10	CL1079.Contig2_All	235 1698 cytochrome P450 [Hodotermopsis sjoestedti]	2.139	Up	0.0001	55.722
Molecular Function	GO:0016705	4	oxidoreductase activity, acting on paired donors, with incorporation or reduction of molecular oxygen	1.28274e-10	CL3702.Contig2_All	2 187 cytochrome P450 monooxygenase CYP6X1v1 [Lygus lineolaris]	2.390	Up	0.000452	7.1223
Molecular Function	GO:0016705	4	oxidoreductase activity, acting on paired donors, with incorporation or reduction of molecular oxygen	1.28274e-10	Unigene8711_All	78 1565 minus strand cytochrome P450 [Nilaparvata lugens]	4.762	Up	0.0011	56.837
Molecular Function	GO:0070011	5	peptidase activity, acting on L-amino acid peptides	3.7739e-05	CL1077.Contig1_All	"1089 2804 minus strand Transmembrane protease, serine 9 [Harpegnathos saltator]"	1.244	Up	0.015	61.858
Molecular Function	GO:0070011	5	peptidase activity, acting on L-amino acid peptides	3.7739e-05	Unigene1485_All	67 1440 PREDICTED: lysosomal Pro-X carboxypeptidase-like [Acyrthosiphon pisum]	1.547	Up	0.00112	51.627
Molecular Function	GO:0070011	5	peptidase activity, acting on L-amino acid peptides	3.7739e-05	Unigene16075_All	173 1174 minus strand cathepsin L-like cysteine protease 2 [Plautia stali]	1.483	Up	0.00615	37.586
Molecular Function	GO:0070011	5	peptidase activity, acting on L-amino acid peptides	3.7739e-05	Unigene14063_All	139 1575 minus strand PREDICTED: xaa-Pro dipeptidase-like [Bombus terrestris]	1.475	Up	0.00195	54.519
Molecular Function	GO:0070011	5	peptidase activity, acting on L-amino acid peptides	3.7739e-05	Unigene18412_All	2 424 Serine proteinase stubble [Camponotus floridanus]	1.378	Up	0.0284	15.632
Molecular Function	GO:0070011	5	peptidase activity, acting on L-amino acid peptides	3.7739e-05	Unigene3411_All	2 721 minus strand trypsin precursor LlSgP4 [Lygus lineolaris]	1.404	Up	0.000218	26.811
Molecular Function	GO:0070011	5	peptidase activity, acting on L-amino acid peptides	3.7739e-05	CL3794.Contig2_All	76 906 trypsin precursor LlGtP1 [Lygus lineolaris]	1.540	Up	0.0022	30.773
Molecular Function	GO:0070011	5	peptidase activity, acting on L-amino acid peptides	3.7739e-05	Unigene14979_All	300 1508 venom serine carboxypeptidase [Danaus plexippus]	1.444	Up	0.0316	45.807
Molecular Function	GO:0070011	5	peptidase activity, acting on L-amino acid peptides	3.7739e-05	CL1335.Contig2_All	123 1127 GH22826 [Drosophila grimshawi] >gi|193899288|gb|EDV98154.1| GH22826 [Drosophila grimshawi]	1.747	Up	0.0449	37.454
Molecular Function	GO:0070011	5	peptidase activity, acting on L-amino acid peptides	3.7739e-05	Unigene18213_All	29 1417 minus strand PREDICTED: venom serine carboxypeptidase-like [Bombus terrestris]	1.595	Up	0.0204	52.784
Molecular Function	GO:0070011	5	peptidase activity, acting on L-amino acid peptides	3.7739e-05	Unigene10829_All	"51 1607 26,29 kDa proteinase-like cysteine protease [Plautia stali]"	1.553	Up	0.00411	58.6
Molecular Function	GO:0070011	5	peptidase activity, acting on L-amino acid peptides	3.7739e-05	Unigene1577_All	53 862 minus strand trypsin precursor LlSgP3 [Lygus lineolaris]	1.553	Up	0.00322	29.989
Molecular Function	GO:0070011	5	peptidase activity, acting on L-amino acid peptides	3.7739e-05	Unigene3337_All	19 894 gluten hydrolyzing proteinase [Eurygaster integriceps]	2.590	Up	0.015	31.512
Molecular Function	GO:0070011	5	peptidase activity, acting on L-amino acid peptides	3.7739e-05	Unigene20396_All	2 721 trypsin precursor LlSgP4 [Lygus lineolaris]	1.445	Up	0.0342	26.721
Molecular Function	GO:0070011	5	peptidase activity, acting on L-amino acid peptides	3.7739e-05	Unigene12443_All	1 396 minus strand PREDICTED: cathepsin L-like [Oreochromis niloticus]	2.735	Up	0.00231	14.238
Molecular Function	GO:0070011	5	peptidase activity, acting on L-amino acid peptides	3.7739e-05	Unigene11900_All	2 547 serine protease [Laccotrephes japonensis]	1.229	Up	0.0172	19.828
Molecular Function	GO:0070011	5	peptidase activity, acting on L-amino acid peptides	3.7739e-05	Unigene25864_All	3 767 minus strand Aminopeptidase N [Harpegnathos saltator]	1.202	Up	0.0465	29.413
Molecular Function	GO:0070011	5	peptidase activity, acting on L-amino acid peptides	3.7739e-05	CL184.Contig3_All	103 984 minus strand secreted salivary trypsin [Triatoma matogrossensis]	2.170	Up	0.00485	32.214
Molecular Function	GO:0070011	5	peptidase activity, acting on L-amino acid peptides	3.7739e-05	Unigene284_All	1 1197 PREDICTED: similar to oligopeptidase [Tribolium castaneum]	1.237	Up	0.002	46.065
Molecular Function	GO:0070011	5	peptidase activity, acting on L-amino acid peptides	3.7739e-05	Unigene13889_All	1 714 minus strand trypsin-like protease [Ranatra unicolor]	1.340	Up	0.00921	26.457
Molecular Function	GO:0070011	5	peptidase activity, acting on L-amino acid peptides	3.7739e-05	CL515.Contig1_All	5 706 minus strand trypsin precursor LlSgP3 [Lygus lineolaris]	1.389	Up	0.0189	25.644
Molecular Function	GO:0070011	5	peptidase activity, acting on L-amino acid peptides	3.7739e-05	CL5255.Contig2_All	70 1101 cathepsin L-like cysteine protease 1 [Plautia stali]	1.767	Up	0.00761	38.57
Molecular Function	GO:0070011	5	peptidase activity, acting on L-amino acid peptides	3.7739e-05	Unigene18257_All	90 848 minus strand trypsin-like protease [Ranatra unicolor]	1.579	Up	0.00106	28.034
Molecular Function	GO:0070011	5	peptidase activity, acting on L-amino acid peptides	3.7739e-05	Unigene18171_All	96 1094 minus strand cathepsin b [Aedes aegypti] >gi|54289254|gb|AAV31917.1| lysosomal cathepsin B [Aedes aegypti] >gi|108874249|gb|EAT38474.1| cathepsin b [Aedes aegypti]	1.693	Up	0.00769	36.55
Molecular Function	GO:0070011	5	peptidase activity, acting on L-amino acid peptides	3.7739e-05	Unigene9896_All	240 1625 PREDICTED: similar to thymus-specific serine protease [Tribolium castaneum]	1.612	Up	0.0025	52.646
Molecular Function	GO:0070011	5	peptidase activity, acting on L-amino acid peptides	3.7739e-05	Unigene4120_All	4 351 salivary trypsin [Triatoma infestans]	1.314	Up	0.0456	12.709
Molecular Function	GO:0070011	5	peptidase activity, acting on L-amino acid peptides	3.7739e-05	Unigene5660_All	58 1467 minus strand PREDICTED: similar to trypsin-like serine protease [Tribolium castaneum]	1.546	Up	0.0195	51.273
Molecular Function	GO:0070011	5	peptidase activity, acting on L-amino acid peptides	3.7739e-05	CL272.Contig6_All	32 1012 minus strand cathepsin L-like proteinase [Triatoma brasiliensis]	1.338	Up	0.0249	35.999
Molecular Function	GO:0070011	5	peptidase activity, acting on L-amino acid peptides	3.7739e-05	CL4079.Contig2_All	1 1044 PREDICTED: cathepsin O-like [Apis mellifera]	1.214	Up	0.0104	39.632
Molecular Function	GO:0070011	5	peptidase activity, acting on L-amino acid peptides	3.7739e-05	Unigene1580_All	90 1082 minus strand cathepsin B [Branchiostoma belcheri tsingtauense]	2.446	Up	0.00759	35.94
Molecular Function	GO:0070011	5	peptidase activity, acting on L-amino acid peptides	3.7739e-05	Unigene14000_All	69 1217 minus strand molting fluid carboxypeptidase A precursor [Bombyx mori] >gi|54114893|dbj|BAD60916.1| molting fluid carboxypeptidase A [Bombyx mori]	1.559	Up	0.00146	43.859
Molecular Function	GO:0070011	5	peptidase activity, acting on L-amino acid peptides	3.7739e-05	Unigene2476_All	9 2690 minus strand Neurotrypsin [Camponotus floridanus]	1.318	Up	0.000327	98.5
Molecular Function	GO:0070011	5	peptidase activity, acting on L-amino acid peptides	3.7739e-05	Unigene8582_All	20 1189 PREDICTED: serine protease snake-like [Bombus impatiens]	1.856	Up	0.0406	42.675
Molecular Function	GO:0050660	6	flavin adenine dinucleotide binding	0.456736	Unigene2139_All	163 2151 minus strand PREDICTED: similar to acyl-CoA oxidase [Tribolium castaneum]	1.232	Up	0.000523	75.236
Molecular Function	GO:0050660	6	flavin adenine dinucleotide binding	0.456736	Unigene14646_All	35 4117 minus strand PREDICTED: xanthine dehydrogenase-like [Bombus terrestris]	1.201	Up	0.00947	150.96
Molecular Function	GO:0050660	6	flavin adenine dinucleotide binding	0.456736	Unigene131_All	211 1482 Uncharacterized aarF domain-containing protein kinase 1 [Camponotus floridanus]	1.292	Up	0.0228	47.001
Molecular Function	GO:0050660	6	flavin adenine dinucleotide binding	0.456736	Unigene3691_All	37 1200 minus strand dimethylaniline monooxygenase 5 [Culex quinquefasciatus] >gi|167875553|gb|EDS38936.1| dimethylaniline monooxygenase 5 [Culex quinquefasciatus]	1.223	Up	0.02	45.292
Molecular Function	GO:0016903	4	oxidoreductase activity, acting on the aldehyde or oxo group of donors	0.723611	CL1926.Contig1_All	280 2487 PREDICTED: delta-1-pyrroline-5-carboxylate synthase-like [Nasonia vitripennis]	1.272	Up	0.00939	79.601
Molecular Function	GO:0016903	4	oxidoreductase activity, acting on the aldehyde or oxo group of donors	0.723611	Unigene33048_All	"2 592 minus strand PREDICTED: succinate-semialdehyde dehydrogenase, mitochondrial-like isoform 1 [Acyrthosiphon pisum]"	1.223	Up	0.0185	21.547
Molecular Function	GO:0008234	6	cysteine-type peptidase activity	0.0136297	Unigene16075_All	173 1174 minus strand cathepsin L-like cysteine protease 2 [Plautia stali]	1.483	Up	0.00615	37.586
Molecular Function	GO:0008234	6	cysteine-type peptidase activity	0.0136297	CL5255.Contig2_All	70 1101 cathepsin L-like cysteine protease 1 [Plautia stali]	1.767	Up	0.00761	38.57
Molecular Function	GO:0008234	6	cysteine-type peptidase activity	0.0136297	Unigene18171_All	96 1094 minus strand cathepsin b [Aedes aegypti] >gi|54289254|gb|AAV31917.1| lysosomal cathepsin B [Aedes aegypti] >gi|108874249|gb|EAT38474.1| cathepsin b [Aedes aegypti]	1.693	Up	0.00769	36.55
Molecular Function	GO:0008234	6	cysteine-type peptidase activity	0.0136297	Unigene10829_All	"51 1607 26,29 kDa proteinase-like cysteine protease [Plautia stali]"	1.553	Up	0.00411	58.6
Molecular Function	GO:0008234	6	cysteine-type peptidase activity	0.0136297	CL1335.Contig2_All	123 1127 GH22826 [Drosophila grimshawi] >gi|193899288|gb|EDV98154.1| GH22826 [Drosophila grimshawi]	1.747	Up	0.0449	37.454
Molecular Function	GO:0008234	6	cysteine-type peptidase activity	0.0136297	Unigene12443_All	1 396 minus strand PREDICTED: cathepsin L-like [Oreochromis niloticus]	2.735	Up	0.00231	14.238
Molecular Function	GO:0008234	6	cysteine-type peptidase activity	0.0136297	CL272.Contig6_All	32 1012 minus strand cathepsin L-like proteinase [Triatoma brasiliensis]	1.338	Up	0.0249	35.999
Molecular Function	GO:0008234	6	cysteine-type peptidase activity	0.0136297	CL4079.Contig2_All	1 1044 PREDICTED: cathepsin O-like [Apis mellifera]	1.214	Up	0.0104	39.632
Molecular Function	GO:0008234	6	cysteine-type peptidase activity	0.0136297	Unigene1580_All	90 1082 minus strand cathepsin B [Branchiostoma belcheri tsingtauense]	2.446	Up	0.00759	35.94
Molecular Function	GO:0070008	7	serine-type exopeptidase activity	0.361866	Unigene14979_All	300 1508 venom serine carboxypeptidase [Danaus plexippus]	1.444	Up	0.0316	45.807
Molecular Function	GO:0070008	7	serine-type exopeptidase activity	0.361866	Unigene18213_All	29 1417 minus strand PREDICTED: venom serine carboxypeptidase-like [Bombus terrestris]	1.595	Up	0.0204	52.784
Molecular Function	GO:0016646	5	oxidoreductase activity, acting on the CH-NH group of donors, NAD or NADP as acceptor	0.319534	Unigene1610_All	96 899 PREDICTED: similar to GA19292-PA [Tribolium castaneum]	1.232	Up	0.0367	28.416
Molecular Function	GO:0016646	5	oxidoreductase activity, acting on the CH-NH group of donors, NAD or NADP as acceptor	0.319534	Unigene1445_All	78 878 minus strand PREDICTED: similar to pyrroline-5-carboxylate reductase [Tribolium castaneum]	1.625	Up	0.0121	28.223
Molecular Function	GO:0016802	5	trialkylsulfonium hydrolase activity	0.319534	CL880.Contig3_All	1 816 PREDICTED: adenosylhomocysteinase-like isoform 2 [Bombus terrestris]	1.295	Up	0.00216	30.267
Molecular Function	GO:0016802	5	trialkylsulfonium hydrolase activity	0.319534	CL880.Contig1_All	190 1272 minus strand PREDICTED: adenosylhomocysteinase A-like [Anolis carolinensis]	1.216	Up	0.0144	39.899
Molecular Function	GO:0008238	6	exopeptidase activity	0.389061	Unigene14979_All	300 1508 venom serine carboxypeptidase [Danaus plexippus]	1.444	Up	0.0316	45.807
Molecular Function	GO:0008238	6	exopeptidase activity	0.389061	Unigene18213_All	29 1417 minus strand PREDICTED: venom serine carboxypeptidase-like [Bombus terrestris]	1.595	Up	0.0204	52.784
Molecular Function	GO:0008238	6	exopeptidase activity	0.389061	Unigene14000_All	69 1217 minus strand molting fluid carboxypeptidase A precursor [Bombyx mori] >gi|54114893|dbj|BAD60916.1| molting fluid carboxypeptidase A [Bombyx mori]	1.559	Up	0.00146	43.859
Molecular Function	GO:0008238	6	exopeptidase activity	0.389061	Unigene14063_All	139 1575 minus strand PREDICTED: xaa-Pro dipeptidase-like [Bombus terrestris]	1.475	Up	0.00195	54.519
Molecular Function	GO:0015930	5	glutamate synthase activity	0.120366	Unigene10512_All	2 3025 minus strand Putative glutamate synthase [NADPH] [Harpegnathos saltator]	1.472	Up	0.000853	109.7
Molecular Function	GO:0015930	5	glutamate synthase activity	0.120366	Unigene33534_All	19 906 Putative glutamate synthase [NADPH] [Harpegnathos saltator]	1.359	Up	0.00258	32.998
Molecular Function	GO:0046914	6	transition metal ion binding	2.73075e-06	Unigene12066_All	38 1063 minus strand phosphotriesterase-like protein [Lygus lineolaris]	1.315	Up	0.0147	38.078
Molecular Function	GO:0046914	6	transition metal ion binding	2.73075e-06	Unigene17997_All	92 793 minus strand ferritin subunit (glycosylated) [Nilaparvata lugens]	1.635	Up	0.00124	26.496
Molecular Function	GO:0046914	6	transition metal ion binding	2.73075e-06	Unigene20256_All	78 1526 cytochrome P450 CYP397A1V2 [Cimex lectularius]	1.462	Up	0.00685	55.796
Molecular Function	GO:0046914	6	transition metal ion binding	2.73075e-06	Unigene11963_All	220 1251 minus strand PREDICTED: probable galactose-1-phosphate uridylyltransferase-like [Acyrthosiphon pisum]	1.406	Up	0.0177	40.388
Molecular Function	GO:0046914	6	transition metal ion binding	2.73075e-06	Unigene18209_All	76 1596 PREDICTED: probable cytochrome P450 6a14-like isoform 2 [Bombus terrestris]	1.215	Up	0.00779	58.57
Molecular Function	GO:0046914	6	transition metal ion binding	2.73075e-06	Unigene12673_All	106 1587 minus strand cytochrome P450 monooxygenase CYP6X1v1 [Lygus lineolaris]	1.568	Up	0.00488	57.101
Molecular Function	GO:0046914	6	transition metal ion binding	2.73075e-06	Unigene20257_All	241 1761 minus strand cytochrome P450 CYP6AX1 protein [Nilaparvata lugens]	1.775	Up	0.00642	58.215
Molecular Function	GO:0046914	6	transition metal ion binding	2.73075e-06	Unigene25864_All	3 767 minus strand Aminopeptidase N [Harpegnathos saltator]	1.202	Up	0.0465	29.413
Molecular Function	GO:0046914	6	transition metal ion binding	2.73075e-06	Unigene5616_All	109 609 minus strand PREDICTED: serine/arginine-rich splicing factor 7-like isoform 1 [Acyrthosiphon pisum] >gi|328724544|ref|XP_003248180.1| PREDICTED: serine/arginine-rich splicing factor 7-like isoform 2 [Acyrthosiphon pisum]	1.298	Up	0.00399	19.716
Molecular Function	GO:0046914	6	transition metal ion binding	2.73075e-06	CL3702.Contig1_All	256 1623 minus strand PREDICTED: similar to cytochrome P450 [Tribolium castaneum]	1.469	Up	0.00281	52.65
Molecular Function	GO:0046914	6	transition metal ion binding	2.73075e-06	CL1936.Contig1_All	6 1436 CYP4CE1 protein [Nilaparvata lugens]	1.719	Up	0.0196	54.836
Molecular Function	GO:0046914	6	transition metal ion binding	2.73075e-06	Unigene18206_All	130 1602 PREDICTED: similar to cytochrome P450 [Tribolium castaneum]	1.490	Up	0.00515	56.677
Molecular Function	GO:0046914	6	transition metal ion binding	2.73075e-06	Unigene11962_All	62 1090 minus strand AGAP005400-PA [Anopheles gambiae str. PEST] >gi|157015419|gb|EAA10887.3| AGAP005400-PA [Anopheles gambiae str. PEST]	1.211	Up	0.012	39.324
Molecular Function	GO:0046914	6	transition metal ion binding	2.73075e-06	Unigene5734_All	92 1699 cytochrome P450 [Leptinotarsa decemlineata]	1.573	Up	0.0412	62.532
Molecular Function	GO:0046914	6	transition metal ion binding	2.73075e-06	CL1079.Contig2_All	235 1698 cytochrome P450 [Hodotermopsis sjoestedti]	2.139	Up	0.0001	55.722
Molecular Function	GO:0046914	6	transition metal ion binding	2.73075e-06	Unigene1483_All	133 1569 PREDICTED: cytochrome P450 6a2-like [Bombus impatiens]	1.402	Up	0.00371	55.123
Molecular Function	GO:0046914	6	transition metal ion binding	2.73075e-06	Unigene9695_All	373 897 minus strand PREDICTED: ferritin subunit-like [Bombus impatiens]	1.563	Up	0.0154	20.212
Molecular Function	GO:0046914	6	transition metal ion binding	2.73075e-06	Unigene8711_All	78 1565 minus strand cytochrome P450 [Nilaparvata lugens]	4.762	Up	0.0011	56.837
Molecular Function	GO:0046914	6	transition metal ion binding	2.73075e-06	Unigene14000_All	69 1217 minus strand molting fluid carboxypeptidase A precursor [Bombyx mori] >gi|54114893|dbj|BAD60916.1| molting fluid carboxypeptidase A [Bombyx mori]	1.559	Up	0.00146	43.859
Molecular Function	GO:0046914	6	transition metal ion binding	2.73075e-06	Unigene14646_All	35 4117 minus strand PREDICTED: xanthine dehydrogenase-like [Bombus terrestris]	1.201	Up	0.00947	150.96
Molecular Function	GO:0046914	6	transition metal ion binding	2.73075e-06	Unigene14700_All	93 1583 minus strand cytochrome P450 CYP6AX1 protein [Nilaparvata lugens]	1.404	Up	0.0488	57.202
Molecular Function	GO:0046914	6	transition metal ion binding	2.73075e-06	CL2752.Contig2_All	63 1547 cytochrome P450 monooxygenase CYP6X1v1 [Lygus lineolaris]	2.624	Up	0.00165	57.102
Molecular Function	GO:0046914	6	transition metal ion binding	2.73075e-06	Unigene14063_All	139 1575 minus strand PREDICTED: xaa-Pro dipeptidase-like [Bombus terrestris]	1.475	Up	0.00195	54.519
Molecular Function	GO:0046914	6	transition metal ion binding	2.73075e-06	Unigene4577_All	232 1386 RING finger protein 13 [Camponotus floridanus]	1.361	Up	0.0106	43.532
Molecular Function	GO:0046914	6	transition metal ion binding	2.73075e-06	Unigene16633_All	29 397 PREDICTED: muscle LIM protein Mlp84B-like [Bombus impatiens]	1.416	Up	0.0466	13.006
Molecular Function	GO:0046914	6	transition metal ion binding	2.73075e-06	CL1001.Contig1_All	127 1665 cytochrome P450 4A6 [Culex quinquefasciatus] >gi|167881331|gb|EDS44714.1| cytochrome P450 4A6 [Culex quinquefasciatus]	1.336	Up	0.0101	59.313
Molecular Function	GO:0046914	6	transition metal ion binding	2.73075e-06	CL3790.Contig3_All	47 1576 minus strand cytochrome P450 6BQ2 [Tribolium castaneum]	2.013	Up	0.00792	59.483
Molecular Function	GO:0046914	6	transition metal ion binding	2.73075e-06	CL1278.Contig1_All	103 1569 RecName: Full=Cytochrome P450 4C1; AltName: Full=CYPIVC1 >gi|155947|gb|AAA27819.1| cytochrome P450 [Blaberus discoidalis]	1.912	Up	0.0252	55.826
Molecular Function	GO:0046914	6	transition metal ion binding	2.73075e-06	CL1219.Contig2_All	86 1087 minus strand PREDICTED: similar to molybdopterin cofactor sulfurase (mosc) [Tribolium castaneum]	2.023	Up	0.000141	38.328
Molecular Function	GO:0046914	6	transition metal ion binding	2.73075e-06	CL3790.Contig1_All	2 1237 minus strand cytochrome P450 [Aedes aegypti] >gi|108874803|gb|EAT39028.1| cytochrome P450 [Aedes aegypti]	2.128	Up	8.57e-05	48.455
Molecular Function	GO:0046914	6	transition metal ion binding	2.73075e-06	Unigene9975_All	57 1100 minus strand sorbitol dehydrogenase [Pyrrhocoris apterus]	1.344	Up	0.000184	37.608
Molecular Function	GO:0046914	6	transition metal ion binding	2.73075e-06	CL1830.Contig1_All	165 1670 cytochrome P450 monooxygenase CYP6X1v1 [Lygus lineolaris]	1.586	Up	0.0423	58.03
Molecular Function	GO:0046914	6	transition metal ion binding	2.73075e-06	Unigene1596_All	185 700 ferritin [Triatoma infestans]	3.397	Up	0.000992	19.469
Molecular Function	GO:0046914	6	transition metal ion binding	2.73075e-06	CL3702.Contig2_All	2 187 cytochrome P450 monooxygenase CYP6X1v1 [Lygus lineolaris]	2.390	Up	0.000452	7.1223
Molecular Function	GO:0030246	3	carbohydrate binding	0.0504717	CL5438.Contig1_All	"259 1116 PREDICTED: similar to thrombospondin type 1 repeat-containing protein 2, partial [Hydra magnipapillata]"	4.487	Up	0.0136	32.082
Molecular Function	GO:0030246	3	carbohydrate binding	0.0504717	Unigene10842_All	435 3059 minus strand PREDICTED: similar to acid alpha-glucosidase [Tribolium castaneum]	1.543	Up	0.00198	98.189
Molecular Function	GO:0030246	3	carbohydrate binding	0.0504717	Unigene13979_All	121 618 minus strand rhamnose binding lectin STL3 precursor [Oncorhynchus mykiss] >gi|11414860|dbj|BAA92257.3| rhamnose binding lectin STL3 [Oncorhynchus mykiss]	1.610	Up	0.00777	18.572
Molecular Function	GO:0030246	3	carbohydrate binding	0.0504717	Unigene16385_All	3 335 rhamnose binding lectin STL3 precursor [Oncorhynchus mykiss] >gi|11414860|dbj|BAA92257.3| rhamnose binding lectin STL3 [Oncorhynchus mykiss]	1.749	Up	0.0162	12.497
Molecular Function	GO:0030246	3	carbohydrate binding	0.0504717	Unigene8348_All	70 2616 minus strand Nodal modulator 2 [Acromyrmex echinatior]	1.236	Up	0.00694	93.911
Molecular Function	GO:0046906	4	tetrapyrrole binding	1.39738e-09	Unigene14700_All	93 1583 minus strand cytochrome P450 CYP6AX1 protein [Nilaparvata lugens]	1.404	Up	0.0488	57.202
Molecular Function	GO:0046906	4	tetrapyrrole binding	1.39738e-09	CL2752.Contig2_All	63 1547 cytochrome P450 monooxygenase CYP6X1v1 [Lygus lineolaris]	2.624	Up	0.00165	57.102
Molecular Function	GO:0046906	4	tetrapyrrole binding	1.39738e-09	Unigene14067_All	66 1544 catalase [Schistocerca gregaria]	1.291	Up	0.0103	55.613
Molecular Function	GO:0046906	4	tetrapyrrole binding	1.39738e-09	Unigene20256_All	78 1526 cytochrome P450 CYP397A1V2 [Cimex lectularius]	1.462	Up	0.00685	55.796
Molecular Function	GO:0046906	4	tetrapyrrole binding	1.39738e-09	Unigene18209_All	76 1596 PREDICTED: probable cytochrome P450 6a14-like isoform 2 [Bombus terrestris]	1.215	Up	0.00779	58.57
Molecular Function	GO:0046906	4	tetrapyrrole binding	1.39738e-09	Unigene12673_All	106 1587 minus strand cytochrome P450 monooxygenase CYP6X1v1 [Lygus lineolaris]	1.568	Up	0.00488	57.101
Molecular Function	GO:0046906	4	tetrapyrrole binding	1.39738e-09	Unigene3586_All	215 1423 minus strand AGAP010150-PA [Anopheles gambiae str. PEST] >gi|116118456|gb|EAA13844.4| AGAP010150-PA [Anopheles gambiae str. PEST]	1.255	Up	0.0187	46.963
Molecular Function	GO:0046906	4	tetrapyrrole binding	1.39738e-09	Unigene20257_All	241 1761 minus strand cytochrome P450 CYP6AX1 protein [Nilaparvata lugens]	1.775	Up	0.00642	58.215
Molecular Function	GO:0046906	4	tetrapyrrole binding	1.39738e-09	CL1001.Contig1_All	127 1665 cytochrome P450 4A6 [Culex quinquefasciatus] >gi|167881331|gb|EDS44714.1| cytochrome P450 4A6 [Culex quinquefasciatus]	1.336	Up	0.0101	59.313
Molecular Function	GO:0046906	4	tetrapyrrole binding	1.39738e-09	CL1278.Contig1_All	103 1569 RecName: Full=Cytochrome P450 4C1; AltName: Full=CYPIVC1 >gi|155947|gb|AAA27819.1| cytochrome P450 [Blaberus discoidalis]	1.912	Up	0.0252	55.826
Molecular Function	GO:0046906	4	tetrapyrrole binding	1.39738e-09	CL3790.Contig3_All	47 1576 minus strand cytochrome P450 6BQ2 [Tribolium castaneum]	2.013	Up	0.00792	59.483
Molecular Function	GO:0046906	4	tetrapyrrole binding	1.39738e-09	CL3790.Contig1_All	2 1237 minus strand cytochrome P450 [Aedes aegypti] >gi|108874803|gb|EAT39028.1| cytochrome P450 [Aedes aegypti]	2.128	Up	8.57e-05	48.455
Molecular Function	GO:0046906	4	tetrapyrrole binding	1.39738e-09	CL1936.Contig1_All	6 1436 CYP4CE1 protein [Nilaparvata lugens]	1.719	Up	0.0196	54.836
Molecular Function	GO:0046906	4	tetrapyrrole binding	1.39738e-09	CL3702.Contig1_All	256 1623 minus strand PREDICTED: similar to cytochrome P450 [Tribolium castaneum]	1.469	Up	0.00281	52.65
Molecular Function	GO:0046906	4	tetrapyrrole binding	1.39738e-09	Unigene18206_All	130 1602 PREDICTED: similar to cytochrome P450 [Tribolium castaneum]	1.490	Up	0.00515	56.677
Molecular Function	GO:0046906	4	tetrapyrrole binding	1.39738e-09	Unigene5734_All	92 1699 cytochrome P450 [Leptinotarsa decemlineata]	1.573	Up	0.0412	62.532
Molecular Function	GO:0046906	4	tetrapyrrole binding	1.39738e-09	Unigene1483_All	133 1569 PREDICTED: cytochrome P450 6a2-like [Bombus impatiens]	1.402	Up	0.00371	55.123
Molecular Function	GO:0046906	4	tetrapyrrole binding	1.39738e-09	CL1830.Contig1_All	165 1670 cytochrome P450 monooxygenase CYP6X1v1 [Lygus lineolaris]	1.586	Up	0.0423	58.03
Molecular Function	GO:0046906	4	tetrapyrrole binding	1.39738e-09	CL1079.Contig2_All	235 1698 cytochrome P450 [Hodotermopsis sjoestedti]	2.139	Up	0.0001	55.722
Molecular Function	GO:0046906	4	tetrapyrrole binding	1.39738e-09	CL3702.Contig2_All	2 187 cytochrome P450 monooxygenase CYP6X1v1 [Lygus lineolaris]	2.390	Up	0.000452	7.1223
Molecular Function	GO:0046906	4	tetrapyrrole binding	1.39738e-09	Unigene8711_All	78 1565 minus strand cytochrome P450 [Nilaparvata lugens]	4.762	Up	0.0011	56.837
Molecular Function	GO:0046906	4	tetrapyrrole binding	1.39738e-09	Unigene4258_All	335 1672 minus strand GJ17765 [Drosophila virilis] >gi|194149265|gb|EDW64963.1| GJ17765 [Drosophila virilis]	1.227	Up	0.00714	51.489
Molecular Function	GO:0016801	4	hydrolase activity, acting on ether bonds	0.0104777	CL880.Contig3_All	1 816 PREDICTED: adenosylhomocysteinase-like isoform 2 [Bombus terrestris]	1.295	Up	0.00216	30.267
Molecular Function	GO:0016801	4	hydrolase activity, acting on ether bonds	0.0104777	Unigene6419_All	65 1402 minus strand PREDICTED: similar to juvenile hormone epoxide hydrolase [Tribolium castaneum]	1.416	Up	0.0301	51.222
Molecular Function	GO:0016801	4	hydrolase activity, acting on ether bonds	0.0104777	CL880.Contig1_All	190 1272 minus strand PREDICTED: adenosylhomocysteinase A-like [Anolis carolinensis]	1.216	Up	0.0144	39.899
Molecular Function	GO:0016801	4	hydrolase activity, acting on ether bonds	0.0104777	Unigene3633_All	396 1748 PREDICTED: similar to juvenile hormone epoxide hydrolase [Tribolium castaneum]	1.368	Up	0.0184	51.695
Molecular Function	GO:0016757	4	transferase activity, transferring glycosyl groups	0.348146	Unigene311_All	133 2205 minus strand PREDICTED: similar to GA17312-PA [Tribolium castaneum]	1.356	Up	0.0137	79.675
Molecular Function	GO:0016757	4	transferase activity, transferring glycosyl groups	0.348146	Unigene623_All	2 1021 minus strand PREDICTED: uridine phosphorylase 1-like [Apis mellifera]	1.289	Up	0.00816	38.488
Molecular Function	GO:0016757	4	transferase activity, transferring glycosyl groups	0.348146	Unigene15055_All	86 1510 minus strand glycogenin [Culex quinquefasciatus] >gi|167876468|gb|EDS39851.1| glycogenin [Culex quinquefasciatus]	1.221	Up	0.00445	51.255
Molecular Function	GO:0016757	4	transferase activity, transferring glycosyl groups	0.348146	Unigene16515_All	56 1003 PREDICTED: similar to glucosyl/glucuronosyl transferases [Tribolium castaneum]	1.302	Up	0.0231	35.393
Molecular Function	GO:0016757	4	transferase activity, transferring glycosyl groups	0.348146	CL743.Contig3_All	357 1907 PREDICTED: similar to glucosyl/glucuronosyl transferases [Tribolium castaneum]	1.233	Up	0.00839	58.831
Molecular Function	GO:0016645	4	oxidoreductase activity, acting on the CH-NH group of donors	0.319534	Unigene1610_All	96 899 PREDICTED: similar to GA19292-PA [Tribolium castaneum]	1.232	Up	0.0367	28.416
Molecular Function	GO:0016645	4	oxidoreductase activity, acting on the CH-NH group of donors	0.319534	Unigene1445_All	78 878 minus strand PREDICTED: similar to pyrroline-5-carboxylate reductase [Tribolium castaneum]	1.625	Up	0.0121	28.223
Molecular Function	GO:0004735	6	pyrroline-5-carboxylate reductase activity	0.120366	Unigene1610_All	96 899 PREDICTED: similar to GA19292-PA [Tribolium castaneum]	1.232	Up	0.0367	28.416
Molecular Function	GO:0004735	6	pyrroline-5-carboxylate reductase activity	0.120366	Unigene1445_All	78 878 minus strand PREDICTED: similar to pyrroline-5-carboxylate reductase [Tribolium castaneum]	1.625	Up	0.0121	28.223
Molecular Function	GO:0020037	5	heme binding	1.39738e-09	Unigene14700_All	93 1583 minus strand cytochrome P450 CYP6AX1 protein [Nilaparvata lugens]	1.404	Up	0.0488	57.202
Molecular Function	GO:0020037	5	heme binding	1.39738e-09	CL2752.Contig2_All	63 1547 cytochrome P450 monooxygenase CYP6X1v1 [Lygus lineolaris]	2.624	Up	0.00165	57.102
Molecular Function	GO:0020037	5	heme binding	1.39738e-09	Unigene14067_All	66 1544 catalase [Schistocerca gregaria]	1.291	Up	0.0103	55.613
Molecular Function	GO:0020037	5	heme binding	1.39738e-09	Unigene20256_All	78 1526 cytochrome P450 CYP397A1V2 [Cimex lectularius]	1.462	Up	0.00685	55.796
Molecular Function	GO:0020037	5	heme binding	1.39738e-09	Unigene18209_All	76 1596 PREDICTED: probable cytochrome P450 6a14-like isoform 2 [Bombus terrestris]	1.215	Up	0.00779	58.57
Molecular Function	GO:0020037	5	heme binding	1.39738e-09	Unigene12673_All	106 1587 minus strand cytochrome P450 monooxygenase CYP6X1v1 [Lygus lineolaris]	1.568	Up	0.00488	57.101
Molecular Function	GO:0020037	5	heme binding	1.39738e-09	Unigene3586_All	215 1423 minus strand AGAP010150-PA [Anopheles gambiae str. PEST] >gi|116118456|gb|EAA13844.4| AGAP010150-PA [Anopheles gambiae str. PEST]	1.255	Up	0.0187	46.963
Molecular Function	GO:0020037	5	heme binding	1.39738e-09	Unigene20257_All	241 1761 minus strand cytochrome P450 CYP6AX1 protein [Nilaparvata lugens]	1.775	Up	0.00642	58.215
Molecular Function	GO:0020037	5	heme binding	1.39738e-09	CL1001.Contig1_All	127 1665 cytochrome P450 4A6 [Culex quinquefasciatus] >gi|167881331|gb|EDS44714.1| cytochrome P450 4A6 [Culex quinquefasciatus]	1.336	Up	0.0101	59.313
Molecular Function	GO:0020037	5	heme binding	1.39738e-09	CL1278.Contig1_All	103 1569 RecName: Full=Cytochrome P450 4C1; AltName: Full=CYPIVC1 >gi|155947|gb|AAA27819.1| cytochrome P450 [Blaberus discoidalis]	1.912	Up	0.0252	55.826
Molecular Function	GO:0020037	5	heme binding	1.39738e-09	CL3790.Contig3_All	47 1576 minus strand cytochrome P450 6BQ2 [Tribolium castaneum]	2.013	Up	0.00792	59.483
Molecular Function	GO:0020037	5	heme binding	1.39738e-09	CL3790.Contig1_All	2 1237 minus strand cytochrome P450 [Aedes aegypti] >gi|108874803|gb|EAT39028.1| cytochrome P450 [Aedes aegypti]	2.128	Up	8.57e-05	48.455
Molecular Function	GO:0020037	5	heme binding	1.39738e-09	CL1936.Contig1_All	6 1436 CYP4CE1 protein [Nilaparvata lugens]	1.719	Up	0.0196	54.836
Molecular Function	GO:0020037	5	heme binding	1.39738e-09	CL3702.Contig1_All	256 1623 minus strand PREDICTED: similar to cytochrome P450 [Tribolium castaneum]	1.469	Up	0.00281	52.65
Molecular Function	GO:0020037	5	heme binding	1.39738e-09	Unigene18206_All	130 1602 PREDICTED: similar to cytochrome P450 [Tribolium castaneum]	1.490	Up	0.00515	56.677
Molecular Function	GO:0020037	5	heme binding	1.39738e-09	Unigene5734_All	92 1699 cytochrome P450 [Leptinotarsa decemlineata]	1.573	Up	0.0412	62.532
Molecular Function	GO:0020037	5	heme binding	1.39738e-09	Unigene1483_All	133 1569 PREDICTED: cytochrome P450 6a2-like [Bombus impatiens]	1.402	Up	0.00371	55.123
Molecular Function	GO:0020037	5	heme binding	1.39738e-09	CL1830.Contig1_All	165 1670 cytochrome P450 monooxygenase CYP6X1v1 [Lygus lineolaris]	1.586	Up	0.0423	58.03
Molecular Function	GO:0020037	5	heme binding	1.39738e-09	CL1079.Contig2_All	235 1698 cytochrome P450 [Hodotermopsis sjoestedti]	2.139	Up	0.0001	55.722
Molecular Function	GO:0020037	5	heme binding	1.39738e-09	CL3702.Contig2_All	2 187 cytochrome P450 monooxygenase CYP6X1v1 [Lygus lineolaris]	2.390	Up	0.000452	7.1223
Molecular Function	GO:0020037	5	heme binding	1.39738e-09	Unigene8711_All	78 1565 minus strand cytochrome P450 [Nilaparvata lugens]	4.762	Up	0.0011	56.837
Molecular Function	GO:0020037	5	heme binding	1.39738e-09	Unigene4258_All	335 1672 minus strand GJ17765 [Drosophila virilis] >gi|194149265|gb|EDW64963.1| GJ17765 [Drosophila virilis]	1.227	Up	0.00714	51.489
Molecular Function	GO:0004180	7	carboxypeptidase activity	0.214515	Unigene14979_All	300 1508 venom serine carboxypeptidase [Danaus plexippus]	1.444	Up	0.0316	45.807
Molecular Function	GO:0004180	7	carboxypeptidase activity	0.214515	Unigene18213_All	29 1417 minus strand PREDICTED: venom serine carboxypeptidase-like [Bombus terrestris]	1.595	Up	0.0204	52.784
Molecular Function	GO:0004180	7	carboxypeptidase activity	0.214515	Unigene14000_All	69 1217 minus strand molting fluid carboxypeptidase A precursor [Bombyx mori] >gi|54114893|dbj|BAD60916.1| molting fluid carboxypeptidase A [Bombyx mori]	1.559	Up	0.00146	43.859
Molecular Function	GO:0070569	6	uridylyltransferase activity	0.175025	Unigene11963_All	220 1251 minus strand PREDICTED: probable galactose-1-phosphate uridylyltransferase-like [Acyrthosiphon pisum]	1.406	Up	0.0177	40.388
Molecular Function	GO:0070569	6	uridylyltransferase activity	0.175025	CL3759.Contig2_All	186 1679 UDP-glucose pyrophosphorylase [Spodoptera exigua]	1.352	Up	0.011	56.345
Molecular Function	GO:0048037	3	cofactor binding	0.0972664	Unigene14646_All	35 4117 minus strand PREDICTED: xanthine dehydrogenase-like [Bombus terrestris]	1.201	Up	0.00947	150.96
Molecular Function	GO:0048037	3	cofactor binding	0.0972664	CL880.Contig3_All	1 816 PREDICTED: adenosylhomocysteinase-like isoform 2 [Bombus terrestris]	1.295	Up	0.00216	30.267
Molecular Function	GO:0048037	3	cofactor binding	0.0972664	CL750.Contig1_All	387 1769 minus strand PREDICTED: similar to 4-aminobutyrate aminotransferase [Tribolium castaneum]	1.772	Up	0.000295	51.43
Molecular Function	GO:0048037	3	cofactor binding	0.0972664	Unigene3580_All	77 1495 minus strand kynurenine aminotransferase [Glossina morsitans morsitans]	1.238	Up	0.0203	53.372
Molecular Function	GO:0048037	3	cofactor binding	0.0972664	CL1219.Contig2_All	86 1087 minus strand PREDICTED: similar to molybdopterin cofactor sulfurase (mosc) [Tribolium castaneum]	2.023	Up	0.000141	38.328
Molecular Function	GO:0048037	3	cofactor binding	0.0972664	Unigene4441_All	116 694 minus strand PREDICTED: protein CREG2-like [Acyrthosiphon pisum]	2.262	Up	0.00101	21.845
Molecular Function	GO:0048037	3	cofactor binding	0.0972664	CL3458.Contig1_All	143 799 minus strand Acyl-CoA-binding domain-containing protein 5 [Camponotus floridanus]	1.209	Up	0.0225	24.571
Molecular Function	GO:0048037	3	cofactor binding	0.0972664	Unigene3597_All	587 2269 minus strand 2-hydroxyacyl-CoA lyase 1 [Camponotus floridanus]	1.316	Up	0.00748	60.924
Molecular Function	GO:0048037	3	cofactor binding	0.0972664	Unigene3691_All	37 1200 minus strand dimethylaniline monooxygenase 5 [Culex quinquefasciatus] >gi|167875553|gb|EDS38936.1| dimethylaniline monooxygenase 5 [Culex quinquefasciatus]	1.223	Up	0.02	45.292
Molecular Function	GO:0048037	3	cofactor binding	0.0972664	Unigene2139_All	163 2151 minus strand PREDICTED: similar to acyl-CoA oxidase [Tribolium castaneum]	1.232	Up	0.000523	75.236
Molecular Function	GO:0048037	3	cofactor binding	0.0972664	Unigene7149_All	45 1463 minus strand PREDICTED: UDP-glucose 6-dehydrogenase-like [Bombus terrestris] >gi|350400065|ref|XP_003485726.1| PREDICTED: UDP-glucose 6-dehydrogenase-like [Bombus impatiens]	1.321	Up	0.0228	52.614
Molecular Function	GO:0048037	3	cofactor binding	0.0972664	Unigene131_All	211 1482 Uncharacterized aarF domain-containing protein kinase 1 [Camponotus floridanus]	1.292	Up	0.0228	47.001
Molecular Function	GO:0048037	3	cofactor binding	0.0972664	CL880.Contig1_All	190 1272 minus strand PREDICTED: adenosylhomocysteinase A-like [Anolis carolinensis]	1.216	Up	0.0144	39.899
Molecular Function	GO:0046872	5	metal ion binding	0.000394307	Unigene12066_All	38 1063 minus strand phosphotriesterase-like protein [Lygus lineolaris]	1.315	Up	0.0147	38.078
Molecular Function	GO:0046872	5	metal ion binding	0.000394307	Unigene17997_All	92 793 minus strand ferritin subunit (glycosylated) [Nilaparvata lugens]	1.635	Up	0.00124	26.496
Molecular Function	GO:0046872	5	metal ion binding	0.000394307	Unigene20256_All	78 1526 cytochrome P450 CYP397A1V2 [Cimex lectularius]	1.462	Up	0.00685	55.796
Molecular Function	GO:0046872	5	metal ion binding	0.000394307	Unigene11963_All	220 1251 minus strand PREDICTED: probable galactose-1-phosphate uridylyltransferase-like [Acyrthosiphon pisum]	1.406	Up	0.0177	40.388
Molecular Function	GO:0046872	5	metal ion binding	0.000394307	Unigene18209_All	76 1596 PREDICTED: probable cytochrome P450 6a14-like isoform 2 [Bombus terrestris]	1.215	Up	0.00779	58.57
Molecular Function	GO:0046872	5	metal ion binding	0.000394307	Unigene12673_All	106 1587 minus strand cytochrome P450 monooxygenase CYP6X1v1 [Lygus lineolaris]	1.568	Up	0.00488	57.101
Molecular Function	GO:0046872	5	metal ion binding	0.000394307	Unigene20257_All	241 1761 minus strand cytochrome P450 CYP6AX1 protein [Nilaparvata lugens]	1.775	Up	0.00642	58.215
Molecular Function	GO:0046872	5	metal ion binding	0.000394307	Unigene25864_All	3 767 minus strand Aminopeptidase N [Harpegnathos saltator]	1.202	Up	0.0465	29.413
Molecular Function	GO:0046872	5	metal ion binding	0.000394307	Unigene17816_All	3 311 minus strand PREDICTED: similar to hippocalcin [Tribolium castaneum]	1.319	Up	0.00624	11.747
Molecular Function	GO:0046872	5	metal ion binding	0.000394307	Unigene21122_All	2 172 minus strand RecName: Full=Metallothionein-1F; Short=MT-1F; AltName: Full=Metallothionein-IF; Short=MT-IF >gi|1827466|dbj|BAA19182.1| metallothionein isoform [Sus scrofa]	5.192	Up	0.00155	5.4836
Molecular Function	GO:0046872	5	metal ion binding	0.000394307	Unigene5616_All	109 609 minus strand PREDICTED: serine/arginine-rich splicing factor 7-like isoform 1 [Acyrthosiphon pisum] >gi|328724544|ref|XP_003248180.1| PREDICTED: serine/arginine-rich splicing factor 7-like isoform 2 [Acyrthosiphon pisum]	1.298	Up	0.00399	19.716
Molecular Function	GO:0046872	5	metal ion binding	0.000394307	CL3702.Contig1_All	256 1623 minus strand PREDICTED: similar to cytochrome P450 [Tribolium castaneum]	1.469	Up	0.00281	52.65
Molecular Function	GO:0046872	5	metal ion binding	0.000394307	CL1936.Contig1_All	6 1436 CYP4CE1 protein [Nilaparvata lugens]	1.719	Up	0.0196	54.836
Molecular Function	GO:0046872	5	metal ion binding	0.000394307	Unigene3688_All	276 728 troponin C [Lethocerus indicus]	1.252	Up	0.00597	17.296
Molecular Function	GO:0046872	5	metal ion binding	0.000394307	Unigene18206_All	130 1602 PREDICTED: similar to cytochrome P450 [Tribolium castaneum]	1.490	Up	0.00515	56.677
Molecular Function	GO:0046872	5	metal ion binding	0.000394307	Unigene11962_All	62 1090 minus strand AGAP005400-PA [Anopheles gambiae str. PEST] >gi|157015419|gb|EAA10887.3| AGAP005400-PA [Anopheles gambiae str. PEST]	1.211	Up	0.012	39.324
Molecular Function	GO:0046872	5	metal ion binding	0.000394307	Unigene5734_All	92 1699 cytochrome P450 [Leptinotarsa decemlineata]	1.573	Up	0.0412	62.532
Molecular Function	GO:0046872	5	metal ion binding	0.000394307	CL1079.Contig2_All	235 1698 cytochrome P450 [Hodotermopsis sjoestedti]	2.139	Up	0.0001	55.722
Molecular Function	GO:0046872	5	metal ion binding	0.000394307	Unigene1483_All	133 1569 PREDICTED: cytochrome P450 6a2-like [Bombus impatiens]	1.402	Up	0.00371	55.123
Molecular Function	GO:0046872	5	metal ion binding	0.000394307	Unigene9695_All	373 897 minus strand PREDICTED: ferritin subunit-like [Bombus impatiens]	1.563	Up	0.0154	20.212
Molecular Function	GO:0046872	5	metal ion binding	0.000394307	Unigene8711_All	78 1565 minus strand cytochrome P450 [Nilaparvata lugens]	4.762	Up	0.0011	56.837
Molecular Function	GO:0046872	5	metal ion binding	0.000394307	Unigene14000_All	69 1217 minus strand molting fluid carboxypeptidase A precursor [Bombyx mori] >gi|54114893|dbj|BAD60916.1| molting fluid carboxypeptidase A [Bombyx mori]	1.559	Up	0.00146	43.859
Molecular Function	GO:0046872	5	metal ion binding	0.000394307	Unigene11805_All	217 678 superoxide dismutase [Triatoma infestans]	1.311	Up	0.0318	15.832
Molecular Function	GO:0046872	5	metal ion binding	0.000394307	Unigene14958_All	206 616 Cu/Zn superoxide dismutase [Cavia porcellus]	1.870	Up	0.024	14.147
Molecular Function	GO:0046872	5	metal ion binding	0.000394307	Unigene14646_All	35 4117 minus strand PREDICTED: xanthine dehydrogenase-like [Bombus terrestris]	1.201	Up	0.00947	150.96
Molecular Function	GO:0046872	5	metal ion binding	0.000394307	Unigene14700_All	93 1583 minus strand cytochrome P450 CYP6AX1 protein [Nilaparvata lugens]	1.404	Up	0.0488	57.202
Molecular Function	GO:0046872	5	metal ion binding	0.000394307	CL2752.Contig2_All	63 1547 cytochrome P450 monooxygenase CYP6X1v1 [Lygus lineolaris]	2.624	Up	0.00165	57.102
Molecular Function	GO:0046872	5	metal ion binding	0.000394307	Unigene7569_All	52 501 minus strand PREDICTED: troponin C-like [Acyrthosiphon pisum]	1.286	Up	0.0426	16.917
Molecular Function	GO:0046872	5	metal ion binding	0.000394307	Unigene14063_All	139 1575 minus strand PREDICTED: xaa-Pro dipeptidase-like [Bombus terrestris]	1.475	Up	0.00195	54.519
Molecular Function	GO:0046872	5	metal ion binding	0.000394307	CL4782.Contig1_All	7 2169 minus strand PREDICTED: uncharacterized protein C05D11.1-like [Nasonia vitripennis]	1.259	Up	0.0445	81.2
Molecular Function	GO:0046872	5	metal ion binding	0.000394307	Unigene4577_All	232 1386 RING finger protein 13 [Camponotus floridanus]	1.361	Up	0.0106	43.532
Molecular Function	GO:0046872	5	metal ion binding	0.000394307	Unigene16633_All	29 397 PREDICTED: muscle LIM protein Mlp84B-like [Bombus impatiens]	1.416	Up	0.0466	13.006
Molecular Function	GO:0046872	5	metal ion binding	0.000394307	CL1001.Contig1_All	127 1665 cytochrome P450 4A6 [Culex quinquefasciatus] >gi|167881331|gb|EDS44714.1| cytochrome P450 4A6 [Culex quinquefasciatus]	1.336	Up	0.0101	59.313
Molecular Function	GO:0046872	5	metal ion binding	0.000394307	CL3790.Contig3_All	47 1576 minus strand cytochrome P450 6BQ2 [Tribolium castaneum]	2.013	Up	0.00792	59.483
Molecular Function	GO:0046872	5	metal ion binding	0.000394307	CL1278.Contig1_All	103 1569 RecName: Full=Cytochrome P450 4C1; AltName: Full=CYPIVC1 >gi|155947|gb|AAA27819.1| cytochrome P450 [Blaberus discoidalis]	1.912	Up	0.0252	55.826
Molecular Function	GO:0046872	5	metal ion binding	0.000394307	CL1219.Contig2_All	86 1087 minus strand PREDICTED: similar to molybdopterin cofactor sulfurase (mosc) [Tribolium castaneum]	2.023	Up	0.000141	38.328
Molecular Function	GO:0046872	5	metal ion binding	0.000394307	CL3790.Contig1_All	2 1237 minus strand cytochrome P450 [Aedes aegypti] >gi|108874803|gb|EAT39028.1| cytochrome P450 [Aedes aegypti]	2.128	Up	8.57e-05	48.455
Molecular Function	GO:0046872	5	metal ion binding	0.000394307	Unigene3597_All	587 2269 minus strand 2-hydroxyacyl-CoA lyase 1 [Camponotus floridanus]	1.316	Up	0.00748	60.924
Molecular Function	GO:0046872	5	metal ion binding	0.000394307	Unigene9975_All	57 1100 minus strand sorbitol dehydrogenase [Pyrrhocoris apterus]	1.344	Up	0.000184	37.608
Molecular Function	GO:0046872	5	metal ion binding	0.000394307	Unigene6392_All	182 3181 minus strand sarco(endo)plasmic reticulum-type calcium ATPase [Heliothis virescens]	1.210	Up	0.00147	109.38
Molecular Function	GO:0046872	5	metal ion binding	0.000394307	CL1830.Contig1_All	165 1670 cytochrome P450 monooxygenase CYP6X1v1 [Lygus lineolaris]	1.586	Up	0.0423	58.03
Molecular Function	GO:0046872	5	metal ion binding	0.000394307	Unigene1596_All	185 700 ferritin [Triatoma infestans]	3.397	Up	0.000992	19.469
Molecular Function	GO:0046872	5	metal ion binding	0.000394307	CL3702.Contig2_All	2 187 cytochrome P450 monooxygenase CYP6X1v1 [Lygus lineolaris]	2.390	Up	0.000452	7.1223
Molecular Function	GO:0050662	4	coenzyme binding	0.177536	Unigene14646_All	35 4117 minus strand PREDICTED: xanthine dehydrogenase-like [Bombus terrestris]	1.201	Up	0.00947	150.96
Molecular Function	GO:0050662	4	coenzyme binding	0.177536	CL880.Contig3_All	1 816 PREDICTED: adenosylhomocysteinase-like isoform 2 [Bombus terrestris]	1.295	Up	0.00216	30.267
Molecular Function	GO:0050662	4	coenzyme binding	0.177536	CL3458.Contig1_All	143 799 minus strand Acyl-CoA-binding domain-containing protein 5 [Camponotus floridanus]	1.209	Up	0.0225	24.571
Molecular Function	GO:0050662	4	coenzyme binding	0.177536	Unigene3597_All	587 2269 minus strand 2-hydroxyacyl-CoA lyase 1 [Camponotus floridanus]	1.316	Up	0.00748	60.924
Molecular Function	GO:0050662	4	coenzyme binding	0.177536	Unigene3691_All	37 1200 minus strand dimethylaniline monooxygenase 5 [Culex quinquefasciatus] >gi|167875553|gb|EDS38936.1| dimethylaniline monooxygenase 5 [Culex quinquefasciatus]	1.223	Up	0.02	45.292
Molecular Function	GO:0050662	4	coenzyme binding	0.177536	Unigene7149_All	45 1463 minus strand PREDICTED: UDP-glucose 6-dehydrogenase-like [Bombus terrestris] >gi|350400065|ref|XP_003485726.1| PREDICTED: UDP-glucose 6-dehydrogenase-like [Bombus impatiens]	1.321	Up	0.0228	52.614
Molecular Function	GO:0050662	4	coenzyme binding	0.177536	Unigene2139_All	163 2151 minus strand PREDICTED: similar to acyl-CoA oxidase [Tribolium castaneum]	1.232	Up	0.000523	75.236
Molecular Function	GO:0050662	4	coenzyme binding	0.177536	CL880.Contig1_All	190 1272 minus strand PREDICTED: adenosylhomocysteinase A-like [Anolis carolinensis]	1.216	Up	0.0144	39.899
Molecular Function	GO:0050662	4	coenzyme binding	0.177536	Unigene131_All	211 1482 Uncharacterized aarF domain-containing protein kinase 1 [Camponotus floridanus]	1.292	Up	0.0228	47.001
Molecular Function	GO:0004197	7	cysteine-type endopeptidase activity	0.319534	Unigene1580_All	90 1082 minus strand cathepsin B [Branchiostoma belcheri tsingtauense]	2.446	Up	0.00759	35.94
Molecular Function	GO:0004197	7	cysteine-type endopeptidase activity	0.319534	Unigene18171_All	96 1094 minus strand cathepsin b [Aedes aegypti] >gi|54289254|gb|AAV31917.1| lysosomal cathepsin B [Aedes aegypti] >gi|108874249|gb|EAT38474.1| cathepsin b [Aedes aegypti]	1.693	Up	0.00769	36.55
Molecular Function	GO:0005506	7	iron ion binding	7.70095e-12	Unigene14646_All	35 4117 minus strand PREDICTED: xanthine dehydrogenase-like [Bombus terrestris]	1.201	Up	0.00947	150.96
Molecular Function	GO:0005506	7	iron ion binding	7.70095e-12	Unigene17997_All	92 793 minus strand ferritin subunit (glycosylated) [Nilaparvata lugens]	1.635	Up	0.00124	26.496
Molecular Function	GO:0005506	7	iron ion binding	7.70095e-12	Unigene14700_All	93 1583 minus strand cytochrome P450 CYP6AX1 protein [Nilaparvata lugens]	1.404	Up	0.0488	57.202
Molecular Function	GO:0005506	7	iron ion binding	7.70095e-12	CL2752.Contig2_All	63 1547 cytochrome P450 monooxygenase CYP6X1v1 [Lygus lineolaris]	2.624	Up	0.00165	57.102
Molecular Function	GO:0005506	7	iron ion binding	7.70095e-12	Unigene20256_All	78 1526 cytochrome P450 CYP397A1V2 [Cimex lectularius]	1.462	Up	0.00685	55.796
Molecular Function	GO:0005506	7	iron ion binding	7.70095e-12	Unigene18209_All	76 1596 PREDICTED: probable cytochrome P450 6a14-like isoform 2 [Bombus terrestris]	1.215	Up	0.00779	58.57
Molecular Function	GO:0005506	7	iron ion binding	7.70095e-12	Unigene12673_All	106 1587 minus strand cytochrome P450 monooxygenase CYP6X1v1 [Lygus lineolaris]	1.568	Up	0.00488	57.101
Molecular Function	GO:0005506	7	iron ion binding	7.70095e-12	Unigene20257_All	241 1761 minus strand cytochrome P450 CYP6AX1 protein [Nilaparvata lugens]	1.775	Up	0.00642	58.215
Molecular Function	GO:0005506	7	iron ion binding	7.70095e-12	CL1001.Contig1_All	127 1665 cytochrome P450 4A6 [Culex quinquefasciatus] >gi|167881331|gb|EDS44714.1| cytochrome P450 4A6 [Culex quinquefasciatus]	1.336	Up	0.0101	59.313
Molecular Function	GO:0005506	7	iron ion binding	7.70095e-12	CL1278.Contig1_All	103 1569 RecName: Full=Cytochrome P450 4C1; AltName: Full=CYPIVC1 >gi|155947|gb|AAA27819.1| cytochrome P450 [Blaberus discoidalis]	1.912	Up	0.0252	55.826
Molecular Function	GO:0005506	7	iron ion binding	7.70095e-12	CL3790.Contig3_All	47 1576 minus strand cytochrome P450 6BQ2 [Tribolium castaneum]	2.013	Up	0.00792	59.483
Molecular Function	GO:0005506	7	iron ion binding	7.70095e-12	CL3790.Contig1_All	2 1237 minus strand cytochrome P450 [Aedes aegypti] >gi|108874803|gb|EAT39028.1| cytochrome P450 [Aedes aegypti]	2.128	Up	8.57e-05	48.455
Molecular Function	GO:0005506	7	iron ion binding	7.70095e-12	CL1936.Contig1_All	6 1436 CYP4CE1 protein [Nilaparvata lugens]	1.719	Up	0.0196	54.836
Molecular Function	GO:0005506	7	iron ion binding	7.70095e-12	CL3702.Contig1_All	256 1623 minus strand PREDICTED: similar to cytochrome P450 [Tribolium castaneum]	1.469	Up	0.00281	52.65
Molecular Function	GO:0005506	7	iron ion binding	7.70095e-12	Unigene18206_All	130 1602 PREDICTED: similar to cytochrome P450 [Tribolium castaneum]	1.490	Up	0.00515	56.677
Molecular Function	GO:0005506	7	iron ion binding	7.70095e-12	Unigene5734_All	92 1699 cytochrome P450 [Leptinotarsa decemlineata]	1.573	Up	0.0412	62.532
Molecular Function	GO:0005506	7	iron ion binding	7.70095e-12	CL1079.Contig2_All	235 1698 cytochrome P450 [Hodotermopsis sjoestedti]	2.139	Up	0.0001	55.722
Molecular Function	GO:0005506	7	iron ion binding	7.70095e-12	CL1830.Contig1_All	165 1670 cytochrome P450 monooxygenase CYP6X1v1 [Lygus lineolaris]	1.586	Up	0.0423	58.03
Molecular Function	GO:0005506	7	iron ion binding	7.70095e-12	Unigene1483_All	133 1569 PREDICTED: cytochrome P450 6a2-like [Bombus impatiens]	1.402	Up	0.00371	55.123
Molecular Function	GO:0005506	7	iron ion binding	7.70095e-12	Unigene1596_All	185 700 ferritin [Triatoma infestans]	3.397	Up	0.000992	19.469
Molecular Function	GO:0005506	7	iron ion binding	7.70095e-12	Unigene9695_All	373 897 minus strand PREDICTED: ferritin subunit-like [Bombus impatiens]	1.563	Up	0.0154	20.212
Molecular Function	GO:0005506	7	iron ion binding	7.70095e-12	CL3702.Contig2_All	2 187 cytochrome P450 monooxygenase CYP6X1v1 [Lygus lineolaris]	2.390	Up	0.000452	7.1223
Molecular Function	GO:0005506	7	iron ion binding	7.70095e-12	Unigene8711_All	78 1565 minus strand cytochrome P450 [Nilaparvata lugens]	4.762	Up	0.0011	56.837
Molecular Function	GO:0004553	5	hydrolase activity, hydrolyzing O-glycosyl compounds	0.115388	Unigene311_All	133 2205 minus strand PREDICTED: similar to GA17312-PA [Tribolium castaneum]	1.356	Up	0.0137	79.675
Molecular Function	GO:0004553	5	hydrolase activity, hydrolyzing O-glycosyl compounds	0.115388	Unigene8606_All	3 1280 PREDICTED: non-lysosomal glucosylceramidase-like [Acyrthosiphon pisum]	1.420	Up	0.00135	48.969
Molecular Function	GO:0004553	5	hydrolase activity, hydrolyzing O-glycosyl compounds	0.115388	CL146.Contig2_All	176 2119 minus strand PREDICTED: beta-glucuronidase-like [Acyrthosiphon pisum]	1.631	Up	0.0248	74.201
Molecular Function	GO:0004553	5	hydrolase activity, hydrolyzing O-glycosyl compounds	0.115388	Unigene10842_All	435 3059 minus strand PREDICTED: similar to acid alpha-glucosidase [Tribolium castaneum]	1.543	Up	0.00198	98.189
Molecular Function	GO:0004553	5	hydrolase activity, hydrolyzing O-glycosyl compounds	0.115388	Unigene9717_All	118 717 PREDICTED: acidic endochitinase SP2-like [Nasonia vitripennis]	1.227	Up	0.0333	22.808
Molecular Function	GO:0004553	5	hydrolase activity, hydrolyzing O-glycosyl compounds	0.115388	Unigene20261_All	354 1904 PREDICTED: uncharacterized family 31 glucosidase KIAA1161-like [Nasonia vitripennis]	2.594	Up	0.000612	59.033
Molecular Function	GO:0004553	5	hydrolase activity, hydrolyzing O-glycosyl compounds	0.115388	Unigene18202_All	160 1980 minus strand PREDICTED: beta-galactosidase-like [Acyrthosiphon pisum]	1.951	Up	1.82e-05	68.82
Molecular Function	GO:0016638	4	oxidoreductase activity, acting on the CH-NH2 group of donors	0.401576	Unigene10512_All	2 3025 minus strand Putative glutamate synthase [NADPH] [Harpegnathos saltator]	1.472	Up	0.000853	109.7
Molecular Function	GO:0016638	4	oxidoreductase activity, acting on the CH-NH2 group of donors	0.401576	Unigene33534_All	19 906 Putative glutamate synthase [NADPH] [Harpegnathos saltator]	1.359	Up	0.00258	32.998
Molecular Function	GO:0008236	6	serine-type peptidase activity	3.24974e-05	CL1077.Contig1_All	"1089 2804 minus strand Transmembrane protease, serine 9 [Harpegnathos saltator]"	1.244	Up	0.015	61.858
Molecular Function	GO:0008236	6	serine-type peptidase activity	3.24974e-05	Unigene1485_All	67 1440 PREDICTED: lysosomal Pro-X carboxypeptidase-like [Acyrthosiphon pisum]	1.547	Up	0.00112	51.627
Molecular Function	GO:0008236	6	serine-type peptidase activity	3.24974e-05	Unigene18412_All	2 424 Serine proteinase stubble [Camponotus floridanus]	1.378	Up	0.0284	15.632
Molecular Function	GO:0008236	6	serine-type peptidase activity	3.24974e-05	Unigene3411_All	2 721 minus strand trypsin precursor LlSgP4 [Lygus lineolaris]	1.404	Up	0.000218	26.811
Molecular Function	GO:0008236	6	serine-type peptidase activity	3.24974e-05	CL3794.Contig2_All	76 906 trypsin precursor LlGtP1 [Lygus lineolaris]	1.540	Up	0.0022	30.773
Molecular Function	GO:0008236	6	serine-type peptidase activity	3.24974e-05	Unigene14979_All	300 1508 venom serine carboxypeptidase [Danaus plexippus]	1.444	Up	0.0316	45.807
Molecular Function	GO:0008236	6	serine-type peptidase activity	3.24974e-05	Unigene18213_All	29 1417 minus strand PREDICTED: venom serine carboxypeptidase-like [Bombus terrestris]	1.595	Up	0.0204	52.784
Molecular Function	GO:0008236	6	serine-type peptidase activity	3.24974e-05	Unigene1577_All	53 862 minus strand trypsin precursor LlSgP3 [Lygus lineolaris]	1.553	Up	0.00322	29.989
Molecular Function	GO:0008236	6	serine-type peptidase activity	3.24974e-05	Unigene3337_All	19 894 gluten hydrolyzing proteinase [Eurygaster integriceps]	2.590	Up	0.015	31.512
Molecular Function	GO:0008236	6	serine-type peptidase activity	3.24974e-05	Unigene20396_All	2 721 trypsin precursor LlSgP4 [Lygus lineolaris]	1.445	Up	0.0342	26.721
Molecular Function	GO:0008236	6	serine-type peptidase activity	3.24974e-05	Unigene11900_All	2 547 serine protease [Laccotrephes japonensis]	1.229	Up	0.0172	19.828
Molecular Function	GO:0008236	6	serine-type peptidase activity	3.24974e-05	CL184.Contig3_All	103 984 minus strand secreted salivary trypsin [Triatoma matogrossensis]	2.170	Up	0.00485	32.214
Molecular Function	GO:0008236	6	serine-type peptidase activity	3.24974e-05	Unigene13889_All	1 714 minus strand trypsin-like protease [Ranatra unicolor]	1.340	Up	0.00921	26.457
Molecular Function	GO:0008236	6	serine-type peptidase activity	3.24974e-05	CL515.Contig1_All	5 706 minus strand trypsin precursor LlSgP3 [Lygus lineolaris]	1.389	Up	0.0189	25.644
Molecular Function	GO:0008236	6	serine-type peptidase activity	3.24974e-05	Unigene18257_All	90 848 minus strand trypsin-like protease [Ranatra unicolor]	1.579	Up	0.00106	28.034
Molecular Function	GO:0008236	6	serine-type peptidase activity	3.24974e-05	Unigene9896_All	240 1625 PREDICTED: similar to thymus-specific serine protease [Tribolium castaneum]	1.612	Up	0.0025	52.646
Molecular Function	GO:0008236	6	serine-type peptidase activity	3.24974e-05	Unigene4120_All	4 351 salivary trypsin [Triatoma infestans]	1.314	Up	0.0456	12.709
Molecular Function	GO:0008236	6	serine-type peptidase activity	3.24974e-05	Unigene5660_All	58 1467 minus strand PREDICTED: similar to trypsin-like serine protease [Tribolium castaneum]	1.546	Up	0.0195	51.273
Molecular Function	GO:0008236	6	serine-type peptidase activity	3.24974e-05	Unigene2476_All	9 2690 minus strand Neurotrypsin [Camponotus floridanus]	1.318	Up	0.000327	98.5
Molecular Function	GO:0008236	6	serine-type peptidase activity	3.24974e-05	Unigene8582_All	20 1189 PREDICTED: serine protease snake-like [Bombus impatiens]	1.856	Up	0.0406	42.675
Molecular Function	GO:0030170	5	pyridoxal phosphate binding	0.564716	CL750.Contig1_All	387 1769 minus strand PREDICTED: similar to 4-aminobutyrate aminotransferase [Tribolium castaneum]	1.772	Up	0.000295	51.43
Molecular Function	GO:0030170	5	pyridoxal phosphate binding	0.564716	Unigene3580_All	77 1495 minus strand kynurenine aminotransferase [Glossina morsitans morsitans]	1.238	Up	0.0203	53.372
Molecular Function	GO:0030170	5	pyridoxal phosphate binding	0.564716	CL1219.Contig2_All	86 1087 minus strand PREDICTED: similar to molybdopterin cofactor sulfurase (mosc) [Tribolium castaneum]	2.023	Up	0.000141	38.328
Molecular Function	GO:0051213	4	dioxygenase activity	0.401576	Unigene15870_All	"163 693 minus strand 1,2-dihydroxy-3-keto-5-methylthiopentene dioxygenase [Camponotus floridanus]"	1.612	Up	0.0179	21.215
Molecular Function	GO:0051213	4	dioxygenase activity	0.401576	CL1943.Contig1_All	22 1164 4-hydroxyphenylpyruvate dioxygenase [Aedes aegypti] >gi|108868917|gb|EAT33142.1| 4-hydroxyphenylpyruvate dioxygenase [Aedes aegypti]	1.999	Up	0.0242	43.722
Molecular Function	GO:0016803	5	ether hydrolase activity	0.120366	Unigene6419_All	65 1402 minus strand PREDICTED: similar to juvenile hormone epoxide hydrolase [Tribolium castaneum]	1.416	Up	0.0301	51.222
Molecular Function	GO:0016803	5	ether hydrolase activity	0.120366	Unigene3633_All	396 1748 PREDICTED: similar to juvenile hormone epoxide hydrolase [Tribolium castaneum]	1.368	Up	0.0184	51.695
Molecular Function	GO:0004784	5	superoxide dismutase activity	0.274407	Unigene14958_All	206 616 Cu/Zn superoxide dismutase [Cavia porcellus]	1.870	Up	0.024	14.147
Molecular Function	GO:0004784	5	superoxide dismutase activity	0.274407	Unigene11805_All	217 678 superoxide dismutase [Triatoma infestans]	1.311	Up	0.0318	15.832
Molecular Function	GO:1901681	3	sulfur compound binding	0.168372	CL3458.Contig1_All	143 799 minus strand Acyl-CoA-binding domain-containing protein 5 [Camponotus floridanus]	1.209	Up	0.0225	24.571
Molecular Function	GO:1901681	3	sulfur compound binding	0.168372	Unigene3597_All	587 2269 minus strand 2-hydroxyacyl-CoA lyase 1 [Camponotus floridanus]	1.316	Up	0.00748	60.924
Molecular Function	GO:1901681	3	sulfur compound binding	0.168372	Unigene20154_All	11 520 PREDICTED: similar to thiamin pyrophosphokinase 1 [Tribolium castaneum]	1.406	Up	0.000291	18.827
Molecular Function	GO:0004013	6	adenosylhomocysteinase activity	0.319534	CL880.Contig3_All	1 816 PREDICTED: adenosylhomocysteinase-like isoform 2 [Bombus terrestris]	1.295	Up	0.00216	30.267
Molecular Function	GO:0004013	6	adenosylhomocysteinase activity	0.319534	CL880.Contig1_All	190 1272 minus strand PREDICTED: adenosylhomocysteinase A-like [Anolis carolinensis]	1.216	Up	0.0144	39.899
Molecular Function	GO:0016620	5	oxidoreductase activity, acting on the aldehyde or oxo group of donors, NAD or NADP as acceptor	0.566121	CL1926.Contig1_All	280 2487 PREDICTED: delta-1-pyrroline-5-carboxylate synthase-like [Nasonia vitripennis]	1.272	Up	0.00939	79.601
Molecular Function	GO:0016620	5	oxidoreductase activity, acting on the aldehyde or oxo group of donors, NAD or NADP as acceptor	0.566121	Unigene33048_All	"2 592 minus strand PREDICTED: succinate-semialdehyde dehydrogenase, mitochondrial-like isoform 1 [Acyrthosiphon pisum]"	1.223	Up	0.0185	21.547
Molecular Function	GO:0051536	4	iron-sulfur cluster binding	0.526843	Unigene10512_All	2 3025 minus strand Putative glutamate synthase [NADPH] [Harpegnathos saltator]	1.472	Up	0.000853	109.7
Molecular Function	GO:0051536	4	iron-sulfur cluster binding	0.526843	Unigene14646_All	35 4117 minus strand PREDICTED: xanthine dehydrogenase-like [Bombus terrestris]	1.201	Up	0.00947	150.96
Molecular Function	GO:0051536	4	iron-sulfur cluster binding	0.526843	CL595.Contig1_All	22 3018 minus strand PREDICTED: dihydropyrimidine dehydrogenase [NADP+]-like isoform 1 [Apis mellifera]	1.395	Up	0.00185	109.55
Molecular Function	GO:0016798	4	hydrolase activity, acting on glycosyl bonds	0.131272	Unigene311_All	133 2205 minus strand PREDICTED: similar to GA17312-PA [Tribolium castaneum]	1.356	Up	0.0137	79.675
Molecular Function	GO:0016798	4	hydrolase activity, acting on glycosyl bonds	0.131272	Unigene8606_All	3 1280 PREDICTED: non-lysosomal glucosylceramidase-like [Acyrthosiphon pisum]	1.420	Up	0.00135	48.969
Molecular Function	GO:0016798	4	hydrolase activity, acting on glycosyl bonds	0.131272	CL146.Contig2_All	176 2119 minus strand PREDICTED: beta-glucuronidase-like [Acyrthosiphon pisum]	1.631	Up	0.0248	74.201
Molecular Function	GO:0016798	4	hydrolase activity, acting on glycosyl bonds	0.131272	Unigene10842_All	435 3059 minus strand PREDICTED: similar to acid alpha-glucosidase [Tribolium castaneum]	1.543	Up	0.00198	98.189
Molecular Function	GO:0016798	4	hydrolase activity, acting on glycosyl bonds	0.131272	Unigene9717_All	118 717 PREDICTED: acidic endochitinase SP2-like [Nasonia vitripennis]	1.227	Up	0.0333	22.808
Molecular Function	GO:0016798	4	hydrolase activity, acting on glycosyl bonds	0.131272	Unigene20261_All	354 1904 PREDICTED: uncharacterized family 31 glucosidase KIAA1161-like [Nasonia vitripennis]	2.594	Up	0.000612	59.033
Molecular Function	GO:0016798	4	hydrolase activity, acting on glycosyl bonds	0.131272	Unigene18202_All	160 1980 minus strand PREDICTED: beta-galactosidase-like [Acyrthosiphon pisum]	1.951	Up	1.82e-05	68.82
Molecular Function	GO:0016702	5	oxidoreductase activity, acting on single donors with incorporation of molecular oxygen, incorporation of two atoms of oxygen	0.401576	Unigene15870_All	"163 693 minus strand 1,2-dihydroxy-3-keto-5-methylthiopentene dioxygenase [Camponotus floridanus]"	1.612	Up	0.0179	21.215
Molecular Function	GO:0016702	5	oxidoreductase activity, acting on single donors with incorporation of molecular oxygen, incorporation of two atoms of oxygen	0.401576	CL1943.Contig1_All	22 1164 4-hydroxyphenylpyruvate dioxygenase [Aedes aegypti] >gi|108868917|gb|EAT33142.1| 4-hydroxyphenylpyruvate dioxygenase [Aedes aegypti]	1.999	Up	0.0242	43.722
Molecular Function	GO:0005549	3	odorant binding	0.566121	Unigene20082_All	163 741 odorant binding protein [Bemisia tabaci]	1.670	Up	0.000171	21.923
Molecular Function	GO:0005549	3	odorant binding	0.566121	Unigene9705_All	113 637 odorant-binding protein RproOBP6 precursor [Rhodnius prolixus]	1.399	Up	0.00484	18.992
Molecular Function	GO:0016491	3	oxidoreductase activity	1.61202e-09	CL1926.Contig1_All	280 2487 PREDICTED: delta-1-pyrroline-5-carboxylate synthase-like [Nasonia vitripennis]	1.272	Up	0.00939	79.601
Molecular Function	GO:0016491	3	oxidoreductase activity	1.61202e-09	Unigene33048_All	"2 592 minus strand PREDICTED: succinate-semialdehyde dehydrogenase, mitochondrial-like isoform 1 [Acyrthosiphon pisum]"	1.223	Up	0.0185	21.547
Molecular Function	GO:0016491	3	oxidoreductase activity	1.61202e-09	Unigene7913_All	110 1042 minus strand PREDICTED: alcohol dehydrogenase [NADP+] A-like [Nasonia vitripennis]	1.660	Up	0.0317	35.341
Molecular Function	GO:0016491	3	oxidoreductase activity	1.61202e-09	CL3383.Contig3_All	152 1546 minus strand PREDICTED: peroxisomal N(1)-acetyl-spermine/spermidine oxidase-like [Bombus terrestris]	1.281	Up	0.00732	52.216
Molecular Function	GO:0016491	3	oxidoreductase activity	1.61202e-09	Unigene3691_All	37 1200 minus strand dimethylaniline monooxygenase 5 [Culex quinquefasciatus] >gi|167875553|gb|EDS38936.1| dimethylaniline monooxygenase 5 [Culex quinquefasciatus]	1.223	Up	0.02	45.292
Molecular Function	GO:0016491	3	oxidoreductase activity	1.61202e-09	Unigene20256_All	78 1526 cytochrome P450 CYP397A1V2 [Cimex lectularius]	1.462	Up	0.00685	55.796
Molecular Function	GO:0016491	3	oxidoreductase activity	1.61202e-09	Unigene15870_All	"163 693 minus strand 1,2-dihydroxy-3-keto-5-methylthiopentene dioxygenase [Camponotus floridanus]"	1.612	Up	0.0179	21.215
Molecular Function	GO:0016491	3	oxidoreductase activity	1.61202e-09	Unigene18209_All	76 1596 PREDICTED: probable cytochrome P450 6a14-like isoform 2 [Bombus terrestris]	1.215	Up	0.00779	58.57
Molecular Function	GO:0016491	3	oxidoreductase activity	1.61202e-09	Unigene1526_All	11 931 minus strand PREDICTED: NADH-cytochrome b5 reductase 2-like [Bombus terrestris]	1.247	Up	0.0203	34.507
Molecular Function	GO:0016491	3	oxidoreductase activity	1.61202e-09	Unigene12673_All	106 1587 minus strand cytochrome P450 monooxygenase CYP6X1v1 [Lygus lineolaris]	1.568	Up	0.00488	57.101
Molecular Function	GO:0016491	3	oxidoreductase activity	1.61202e-09	Unigene20257_All	241 1761 minus strand cytochrome P450 CYP6AX1 protein [Nilaparvata lugens]	1.775	Up	0.00642	58.215
Molecular Function	GO:0016491	3	oxidoreductase activity	1.61202e-09	Unigene131_All	211 1482 Uncharacterized aarF domain-containing protein kinase 1 [Camponotus floridanus]	1.292	Up	0.0228	47.001
Molecular Function	GO:0016491	3	oxidoreductase activity	1.61202e-09	Unigene1445_All	78 878 minus strand PREDICTED: similar to pyrroline-5-carboxylate reductase [Tribolium castaneum]	1.625	Up	0.0121	28.223
Molecular Function	GO:0016491	3	oxidoreductase activity	1.61202e-09	Unigene34324_All	46 1053 minus strand PREDICTED: prostaglandin reductase 1-like [Nasonia vitripennis]	1.206	Up	0.0071	36.702
Molecular Function	GO:0016491	3	oxidoreductase activity	1.61202e-09	CL3965.Contig2_All	136 1092 minus strand PREDICTED: alcohol dehydrogenase [NADP+] A-like [Apis mellifera]	1.264	Up	0.00425	36.218
Molecular Function	GO:0016491	3	oxidoreductase activity	1.61202e-09	Unigene10512_All	2 3025 minus strand Putative glutamate synthase [NADPH] [Harpegnathos saltator]	1.472	Up	0.000853	109.7
Molecular Function	GO:0016491	3	oxidoreductase activity	1.61202e-09	Unigene8465_All	23 1945 minus strand PREDICTED: aldehyde oxidase-like [Bombus terrestris]	2.113	Up	0.00602	71.07
Molecular Function	GO:0016491	3	oxidoreductase activity	1.61202e-09	Unigene1610_All	96 899 PREDICTED: similar to GA19292-PA [Tribolium castaneum]	1.232	Up	0.0367	28.416
Molecular Function	GO:0016491	3	oxidoreductase activity	1.61202e-09	CL3702.Contig1_All	256 1623 minus strand PREDICTED: similar to cytochrome P450 [Tribolium castaneum]	1.469	Up	0.00281	52.65
Molecular Function	GO:0016491	3	oxidoreductase activity	1.61202e-09	CL1936.Contig1_All	6 1436 CYP4CE1 protein [Nilaparvata lugens]	1.719	Up	0.0196	54.836
Molecular Function	GO:0016491	3	oxidoreductase activity	1.61202e-09	Unigene18206_All	130 1602 PREDICTED: similar to cytochrome P450 [Tribolium castaneum]	1.490	Up	0.00515	56.677
Molecular Function	GO:0016491	3	oxidoreductase activity	1.61202e-09	Unigene7149_All	45 1463 minus strand PREDICTED: UDP-glucose 6-dehydrogenase-like [Bombus terrestris] >gi|350400065|ref|XP_003485726.1| PREDICTED: UDP-glucose 6-dehydrogenase-like [Bombus impatiens]	1.321	Up	0.0228	52.614
Molecular Function	GO:0016491	3	oxidoreductase activity	1.61202e-09	Unigene5734_All	92 1699 cytochrome P450 [Leptinotarsa decemlineata]	1.573	Up	0.0412	62.532
Molecular Function	GO:0016491	3	oxidoreductase activity	1.61202e-09	CL1079.Contig2_All	235 1698 cytochrome P450 [Hodotermopsis sjoestedti]	2.139	Up	0.0001	55.722
Molecular Function	GO:0016491	3	oxidoreductase activity	1.61202e-09	Unigene1483_All	133 1569 PREDICTED: cytochrome P450 6a2-like [Bombus impatiens]	1.402	Up	0.00371	55.123
Molecular Function	GO:0016491	3	oxidoreductase activity	1.61202e-09	Unigene4258_All	335 1672 minus strand GJ17765 [Drosophila virilis] >gi|194149265|gb|EDW64963.1| GJ17765 [Drosophila virilis]	1.227	Up	0.00714	51.489
Molecular Function	GO:0016491	3	oxidoreductase activity	1.61202e-09	Unigene8711_All	78 1565 minus strand cytochrome P450 [Nilaparvata lugens]	4.762	Up	0.0011	56.837
Molecular Function	GO:0016491	3	oxidoreductase activity	1.61202e-09	Unigene11805_All	217 678 superoxide dismutase [Triatoma infestans]	1.311	Up	0.0318	15.832
Molecular Function	GO:0016491	3	oxidoreductase activity	1.61202e-09	Unigene16082_All	62 1063 minus strand PREDICTED: prostaglandin reductase 1-like [Nasonia vitripennis]	1.499	Up	0.0269	36.296
Molecular Function	GO:0016491	3	oxidoreductase activity	1.61202e-09	Unigene14958_All	206 616 Cu/Zn superoxide dismutase [Cavia porcellus]	1.870	Up	0.024	14.147
Molecular Function	GO:0016491	3	oxidoreductase activity	1.61202e-09	Unigene14646_All	35 4117 minus strand PREDICTED: xanthine dehydrogenase-like [Bombus terrestris]	1.201	Up	0.00947	150.96
Molecular Function	GO:0016491	3	oxidoreductase activity	1.61202e-09	Unigene14700_All	93 1583 minus strand cytochrome P450 CYP6AX1 protein [Nilaparvata lugens]	1.404	Up	0.0488	57.202
Molecular Function	GO:0016491	3	oxidoreductase activity	1.61202e-09	CL2752.Contig2_All	63 1547 cytochrome P450 monooxygenase CYP6X1v1 [Lygus lineolaris]	2.624	Up	0.00165	57.102
Molecular Function	GO:0016491	3	oxidoreductase activity	1.61202e-09	CL1943.Contig1_All	22 1164 4-hydroxyphenylpyruvate dioxygenase [Aedes aegypti] >gi|108868917|gb|EAT33142.1| 4-hydroxyphenylpyruvate dioxygenase [Aedes aegypti]	1.999	Up	0.0242	43.722
Molecular Function	GO:0016491	3	oxidoreductase activity	1.61202e-09	Unigene14067_All	66 1544 catalase [Schistocerca gregaria]	1.291	Up	0.0103	55.613
Molecular Function	GO:0016491	3	oxidoreductase activity	1.61202e-09	Unigene2139_All	163 2151 minus strand PREDICTED: similar to acyl-CoA oxidase [Tribolium castaneum]	1.232	Up	0.000523	75.236
Molecular Function	GO:0016491	3	oxidoreductase activity	1.61202e-09	CL1001.Contig1_All	127 1665 cytochrome P450 4A6 [Culex quinquefasciatus] >gi|167881331|gb|EDS44714.1| cytochrome P450 4A6 [Culex quinquefasciatus]	1.336	Up	0.0101	59.313
Molecular Function	GO:0016491	3	oxidoreductase activity	1.61202e-09	Unigene4604_All	30 1343 PREDICTED: fatty acid synthase-like [Acyrthosiphon pisum]	1.388	Up	0.0288	48.523
Molecular Function	GO:0016491	3	oxidoreductase activity	1.61202e-09	CL3790.Contig3_All	47 1576 minus strand cytochrome P450 6BQ2 [Tribolium castaneum]	2.013	Up	0.00792	59.483
Molecular Function	GO:0016491	3	oxidoreductase activity	1.61202e-09	CL1278.Contig1_All	103 1569 RecName: Full=Cytochrome P450 4C1; AltName: Full=CYPIVC1 >gi|155947|gb|AAA27819.1| cytochrome P450 [Blaberus discoidalis]	1.912	Up	0.0252	55.826
Molecular Function	GO:0016491	3	oxidoreductase activity	1.61202e-09	Unigene33534_All	19 906 Putative glutamate synthase [NADPH] [Harpegnathos saltator]	1.359	Up	0.00258	32.998
Molecular Function	GO:0016491	3	oxidoreductase activity	1.61202e-09	CL3790.Contig1_All	2 1237 minus strand cytochrome P450 [Aedes aegypti] >gi|108874803|gb|EAT39028.1| cytochrome P450 [Aedes aegypti]	2.128	Up	8.57e-05	48.455
Molecular Function	GO:0016491	3	oxidoreductase activity	1.61202e-09	Unigene4441_All	116 694 minus strand PREDICTED: protein CREG2-like [Acyrthosiphon pisum]	2.262	Up	0.00101	21.845
Molecular Function	GO:0016491	3	oxidoreductase activity	1.61202e-09	Unigene1450_All	64 984 stearoyl-coa desaturase [Aedes aegypti] >gi|108880849|gb|EAT45074.1| stearoyl-coa desaturase [Aedes aegypti]	1.281	Up	0.0138	34.976
Molecular Function	GO:0016491	3	oxidoreductase activity	1.61202e-09	CL3194.Contig1_All	921 1145 minus strand Cytochrome c oxidase subunit VIb isoform 1 [Camponotus floridanus]	1.209	Up	0.0256	8.7499
Molecular Function	GO:0016491	3	oxidoreductase activity	1.61202e-09	Unigene18282_All	400 1320 PREDICTED: similar to CG6084 CG6084-PA [Tribolium castaneum]	1.380	Up	1.84e-05	34.703
Molecular Function	GO:0016491	3	oxidoreductase activity	1.61202e-09	Unigene2516_All	109 1032 PREDICTED: alcohol dehydrogenase [NADP+] A-like [Bombus impatiens]	1.712	Up	0.0497	35.511
Molecular Function	GO:0016491	3	oxidoreductase activity	1.61202e-09	Unigene9975_All	57 1100 minus strand sorbitol dehydrogenase [Pyrrhocoris apterus]	1.344	Up	0.000184	37.608
Molecular Function	GO:0016491	3	oxidoreductase activity	1.61202e-09	Unigene18222_All	62 829 minus strand PREDICTED: 15-hydroxyprostaglandin dehydrogenase [NAD+]-like [Bombus impatiens]	1.313	Up	0.00417	27.217
Molecular Function	GO:0016491	3	oxidoreductase activity	1.61202e-09	CL1830.Contig1_All	165 1670 cytochrome P450 monooxygenase CYP6X1v1 [Lygus lineolaris]	1.586	Up	0.0423	58.03
Molecular Function	GO:0016491	3	oxidoreductase activity	1.61202e-09	CL595.Contig1_All	22 3018 minus strand PREDICTED: dihydropyrimidine dehydrogenase [NADP+]-like isoform 1 [Apis mellifera]	1.395	Up	0.00185	109.55
Molecular Function	GO:0016491	3	oxidoreductase activity	1.61202e-09	CL3702.Contig2_All	2 187 cytochrome P450 monooxygenase CYP6X1v1 [Lygus lineolaris]	2.390	Up	0.000452	7.1223
Molecular Function	GO:0016491	3	oxidoreductase activity	1.61202e-09	Unigene8543_All	100 2229 PREDICTED: peroxisomal multifunctional enzyme type 2-like isoform 2 [Acyrthosiphon pisum] >gi|328711510|ref|XP_003244559.1| PREDICTED: peroxisomal multifunctional enzyme type 2-like isoform 3 [Acyrthosiphon pisum]	1.254	Up	0.00173	77.229
Molecular Function	GO:0004175	6	endopeptidase activity	0.00278811	CL1077.Contig1_All	"1089 2804 minus strand Transmembrane protease, serine 9 [Harpegnathos saltator]"	1.244	Up	0.015	61.858
Molecular Function	GO:0004175	6	endopeptidase activity	0.00278811	Unigene18412_All	2 424 Serine proteinase stubble [Camponotus floridanus]	1.378	Up	0.0284	15.632
Molecular Function	GO:0004175	6	endopeptidase activity	0.00278811	Unigene3411_All	2 721 minus strand trypsin precursor LlSgP4 [Lygus lineolaris]	1.404	Up	0.000218	26.811
Molecular Function	GO:0004175	6	endopeptidase activity	0.00278811	CL3794.Contig2_All	76 906 trypsin precursor LlGtP1 [Lygus lineolaris]	1.540	Up	0.0022	30.773
Molecular Function	GO:0004175	6	endopeptidase activity	0.00278811	Unigene1577_All	53 862 minus strand trypsin precursor LlSgP3 [Lygus lineolaris]	1.553	Up	0.00322	29.989
Molecular Function	GO:0004175	6	endopeptidase activity	0.00278811	Unigene3337_All	19 894 gluten hydrolyzing proteinase [Eurygaster integriceps]	2.590	Up	0.015	31.512
Molecular Function	GO:0004175	6	endopeptidase activity	0.00278811	Unigene20396_All	2 721 trypsin precursor LlSgP4 [Lygus lineolaris]	1.445	Up	0.0342	26.721
Molecular Function	GO:0004175	6	endopeptidase activity	0.00278811	Unigene11900_All	2 547 serine protease [Laccotrephes japonensis]	1.229	Up	0.0172	19.828
Molecular Function	GO:0004175	6	endopeptidase activity	0.00278811	CL184.Contig3_All	103 984 minus strand secreted salivary trypsin [Triatoma matogrossensis]	2.170	Up	0.00485	32.214
Molecular Function	GO:0004175	6	endopeptidase activity	0.00278811	Unigene284_All	1 1197 PREDICTED: similar to oligopeptidase [Tribolium castaneum]	1.237	Up	0.002	46.065
Molecular Function	GO:0004175	6	endopeptidase activity	0.00278811	CL515.Contig1_All	5 706 minus strand trypsin precursor LlSgP3 [Lygus lineolaris]	1.389	Up	0.0189	25.644
Molecular Function	GO:0004175	6	endopeptidase activity	0.00278811	Unigene13889_All	1 714 minus strand trypsin-like protease [Ranatra unicolor]	1.340	Up	0.00921	26.457
Molecular Function	GO:0004175	6	endopeptidase activity	0.00278811	Unigene18257_All	90 848 minus strand trypsin-like protease [Ranatra unicolor]	1.579	Up	0.00106	28.034
Molecular Function	GO:0004175	6	endopeptidase activity	0.00278811	Unigene18171_All	96 1094 minus strand cathepsin b [Aedes aegypti] >gi|54289254|gb|AAV31917.1| lysosomal cathepsin B [Aedes aegypti] >gi|108874249|gb|EAT38474.1| cathepsin b [Aedes aegypti]	1.693	Up	0.00769	36.55
Molecular Function	GO:0004175	6	endopeptidase activity	0.00278811	Unigene4120_All	4 351 salivary trypsin [Triatoma infestans]	1.314	Up	0.0456	12.709
Molecular Function	GO:0004175	6	endopeptidase activity	0.00278811	Unigene5660_All	58 1467 minus strand PREDICTED: similar to trypsin-like serine protease [Tribolium castaneum]	1.546	Up	0.0195	51.273
Molecular Function	GO:0004175	6	endopeptidase activity	0.00278811	Unigene1580_All	90 1082 minus strand cathepsin B [Branchiostoma belcheri tsingtauense]	2.446	Up	0.00759	35.94
Molecular Function	GO:0004175	6	endopeptidase activity	0.00278811	Unigene2476_All	9 2690 minus strand Neurotrypsin [Camponotus floridanus]	1.318	Up	0.000327	98.5
Molecular Function	GO:0004175	6	endopeptidase activity	0.00278811	Unigene8582_All	20 1189 PREDICTED: serine protease snake-like [Bombus impatiens]	1.856	Up	0.0406	42.675
Molecular Function	GO:0004185	8	serine-type carboxypeptidase activity	0.319534	Unigene14979_All	300 1508 venom serine carboxypeptidase [Danaus plexippus]	1.444	Up	0.0316	45.807
Molecular Function	GO:0004185	8	serine-type carboxypeptidase activity	0.319534	Unigene18213_All	29 1417 minus strand PREDICTED: venom serine carboxypeptidase-like [Bombus terrestris]	1.595	Up	0.0204	52.784
Molecular Function	GO:0004601	5	peroxidase activity	0.705203	Unigene14067_All	66 1544 catalase [Schistocerca gregaria]	1.291	Up	0.0103	55.613
Molecular Function	GO:0004601	5	peroxidase activity	0.705203	Unigene4258_All	335 1672 minus strand GJ17765 [Drosophila virilis] >gi|194149265|gb|EDW64963.1| GJ17765 [Drosophila virilis]	1.227	Up	0.00714	51.489
Molecular Function	GO:0016721	4	oxidoreductase activity, acting on superoxide radicals as acceptor	0.274407	Unigene14958_All	206 616 Cu/Zn superoxide dismutase [Cavia porcellus]	1.870	Up	0.024	14.147
Molecular Function	GO:0016721	4	oxidoreductase activity, acting on superoxide radicals as acceptor	0.274407	Unigene11805_All	217 678 superoxide dismutase [Triatoma infestans]	1.311	Up	0.0318	15.832
Molecular Function	GO:0043169	4	cation binding	0.000319959	Unigene12066_All	38 1063 minus strand phosphotriesterase-like protein [Lygus lineolaris]	1.315	Up	0.0147	38.078
Molecular Function	GO:0043169	4	cation binding	0.000319959	Unigene17997_All	92 793 minus strand ferritin subunit (glycosylated) [Nilaparvata lugens]	1.635	Up	0.00124	26.496
Molecular Function	GO:0043169	4	cation binding	0.000319959	Unigene20256_All	78 1526 cytochrome P450 CYP397A1V2 [Cimex lectularius]	1.462	Up	0.00685	55.796
Molecular Function	GO:0043169	4	cation binding	0.000319959	Unigene11963_All	220 1251 minus strand PREDICTED: probable galactose-1-phosphate uridylyltransferase-like [Acyrthosiphon pisum]	1.406	Up	0.0177	40.388
Molecular Function	GO:0043169	4	cation binding	0.000319959	Unigene18209_All	76 1596 PREDICTED: probable cytochrome P450 6a14-like isoform 2 [Bombus terrestris]	1.215	Up	0.00779	58.57
Molecular Function	GO:0043169	4	cation binding	0.000319959	Unigene12673_All	106 1587 minus strand cytochrome P450 monooxygenase CYP6X1v1 [Lygus lineolaris]	1.568	Up	0.00488	57.101
Molecular Function	GO:0043169	4	cation binding	0.000319959	Unigene20257_All	241 1761 minus strand cytochrome P450 CYP6AX1 protein [Nilaparvata lugens]	1.775	Up	0.00642	58.215
Molecular Function	GO:0043169	4	cation binding	0.000319959	Unigene25864_All	3 767 minus strand Aminopeptidase N [Harpegnathos saltator]	1.202	Up	0.0465	29.413
Molecular Function	GO:0043169	4	cation binding	0.000319959	Unigene17816_All	3 311 minus strand PREDICTED: similar to hippocalcin [Tribolium castaneum]	1.319	Up	0.00624	11.747
Molecular Function	GO:0043169	4	cation binding	0.000319959	Unigene21122_All	2 172 minus strand RecName: Full=Metallothionein-1F; Short=MT-1F; AltName: Full=Metallothionein-IF; Short=MT-IF >gi|1827466|dbj|BAA19182.1| metallothionein isoform [Sus scrofa]	5.192	Up	0.00155	5.4836
Molecular Function	GO:0043169	4	cation binding	0.000319959	Unigene5616_All	109 609 minus strand PREDICTED: serine/arginine-rich splicing factor 7-like isoform 1 [Acyrthosiphon pisum] >gi|328724544|ref|XP_003248180.1| PREDICTED: serine/arginine-rich splicing factor 7-like isoform 2 [Acyrthosiphon pisum]	1.298	Up	0.00399	19.716
Molecular Function	GO:0043169	4	cation binding	0.000319959	CL3702.Contig1_All	256 1623 minus strand PREDICTED: similar to cytochrome P450 [Tribolium castaneum]	1.469	Up	0.00281	52.65
Molecular Function	GO:0043169	4	cation binding	0.000319959	CL1936.Contig1_All	6 1436 CYP4CE1 protein [Nilaparvata lugens]	1.719	Up	0.0196	54.836
Molecular Function	GO:0043169	4	cation binding	0.000319959	Unigene3688_All	276 728 troponin C [Lethocerus indicus]	1.252	Up	0.00597	17.296
Molecular Function	GO:0043169	4	cation binding	0.000319959	Unigene18206_All	130 1602 PREDICTED: similar to cytochrome P450 [Tribolium castaneum]	1.490	Up	0.00515	56.677
Molecular Function	GO:0043169	4	cation binding	0.000319959	Unigene11962_All	62 1090 minus strand AGAP005400-PA [Anopheles gambiae str. PEST] >gi|157015419|gb|EAA10887.3| AGAP005400-PA [Anopheles gambiae str. PEST]	1.211	Up	0.012	39.324
Molecular Function	GO:0043169	4	cation binding	0.000319959	Unigene5734_All	92 1699 cytochrome P450 [Leptinotarsa decemlineata]	1.573	Up	0.0412	62.532
Molecular Function	GO:0043169	4	cation binding	0.000319959	CL1079.Contig2_All	235 1698 cytochrome P450 [Hodotermopsis sjoestedti]	2.139	Up	0.0001	55.722
Molecular Function	GO:0043169	4	cation binding	0.000319959	Unigene1483_All	133 1569 PREDICTED: cytochrome P450 6a2-like [Bombus impatiens]	1.402	Up	0.00371	55.123
Molecular Function	GO:0043169	4	cation binding	0.000319959	Unigene9695_All	373 897 minus strand PREDICTED: ferritin subunit-like [Bombus impatiens]	1.563	Up	0.0154	20.212
Molecular Function	GO:0043169	4	cation binding	0.000319959	Unigene8711_All	78 1565 minus strand cytochrome P450 [Nilaparvata lugens]	4.762	Up	0.0011	56.837
Molecular Function	GO:0043169	4	cation binding	0.000319959	Unigene14000_All	69 1217 minus strand molting fluid carboxypeptidase A precursor [Bombyx mori] >gi|54114893|dbj|BAD60916.1| molting fluid carboxypeptidase A [Bombyx mori]	1.559	Up	0.00146	43.859
Molecular Function	GO:0043169	4	cation binding	0.000319959	Unigene11805_All	217 678 superoxide dismutase [Triatoma infestans]	1.311	Up	0.0318	15.832
Molecular Function	GO:0043169	4	cation binding	0.000319959	Unigene14958_All	206 616 Cu/Zn superoxide dismutase [Cavia porcellus]	1.870	Up	0.024	14.147
Molecular Function	GO:0043169	4	cation binding	0.000319959	Unigene14646_All	35 4117 minus strand PREDICTED: xanthine dehydrogenase-like [Bombus terrestris]	1.201	Up	0.00947	150.96
Molecular Function	GO:0043169	4	cation binding	0.000319959	Unigene14700_All	93 1583 minus strand cytochrome P450 CYP6AX1 protein [Nilaparvata lugens]	1.404	Up	0.0488	57.202
Molecular Function	GO:0043169	4	cation binding	0.000319959	CL2752.Contig2_All	63 1547 cytochrome P450 monooxygenase CYP6X1v1 [Lygus lineolaris]	2.624	Up	0.00165	57.102
Molecular Function	GO:0043169	4	cation binding	0.000319959	Unigene7569_All	52 501 minus strand PREDICTED: troponin C-like [Acyrthosiphon pisum]	1.286	Up	0.0426	16.917
Molecular Function	GO:0043169	4	cation binding	0.000319959	Unigene14063_All	139 1575 minus strand PREDICTED: xaa-Pro dipeptidase-like [Bombus terrestris]	1.475	Up	0.00195	54.519
Molecular Function	GO:0043169	4	cation binding	0.000319959	CL4782.Contig1_All	7 2169 minus strand PREDICTED: uncharacterized protein C05D11.1-like [Nasonia vitripennis]	1.259	Up	0.0445	81.2
Molecular Function	GO:0043169	4	cation binding	0.000319959	Unigene4577_All	232 1386 RING finger protein 13 [Camponotus floridanus]	1.361	Up	0.0106	43.532
Molecular Function	GO:0043169	4	cation binding	0.000319959	Unigene16633_All	29 397 PREDICTED: muscle LIM protein Mlp84B-like [Bombus impatiens]	1.416	Up	0.0466	13.006
Molecular Function	GO:0043169	4	cation binding	0.000319959	CL1001.Contig1_All	127 1665 cytochrome P450 4A6 [Culex quinquefasciatus] >gi|167881331|gb|EDS44714.1| cytochrome P450 4A6 [Culex quinquefasciatus]	1.336	Up	0.0101	59.313
Molecular Function	GO:0043169	4	cation binding	0.000319959	Unigene311_All	133 2205 minus strand PREDICTED: similar to GA17312-PA [Tribolium castaneum]	1.356	Up	0.0137	79.675
Molecular Function	GO:0043169	4	cation binding	0.000319959	CL3790.Contig3_All	47 1576 minus strand cytochrome P450 6BQ2 [Tribolium castaneum]	2.013	Up	0.00792	59.483
Molecular Function	GO:0043169	4	cation binding	0.000319959	CL1278.Contig1_All	103 1569 RecName: Full=Cytochrome P450 4C1; AltName: Full=CYPIVC1 >gi|155947|gb|AAA27819.1| cytochrome P450 [Blaberus discoidalis]	1.912	Up	0.0252	55.826
Molecular Function	GO:0043169	4	cation binding	0.000319959	CL1219.Contig2_All	86 1087 minus strand PREDICTED: similar to molybdopterin cofactor sulfurase (mosc) [Tribolium castaneum]	2.023	Up	0.000141	38.328
Molecular Function	GO:0043169	4	cation binding	0.000319959	CL3790.Contig1_All	2 1237 minus strand cytochrome P450 [Aedes aegypti] >gi|108874803|gb|EAT39028.1| cytochrome P450 [Aedes aegypti]	2.128	Up	8.57e-05	48.455
Molecular Function	GO:0043169	4	cation binding	0.000319959	Unigene3597_All	587 2269 minus strand 2-hydroxyacyl-CoA lyase 1 [Camponotus floridanus]	1.316	Up	0.00748	60.924
Molecular Function	GO:0043169	4	cation binding	0.000319959	Unigene9975_All	57 1100 minus strand sorbitol dehydrogenase [Pyrrhocoris apterus]	1.344	Up	0.000184	37.608
Molecular Function	GO:0043169	4	cation binding	0.000319959	Unigene6392_All	182 3181 minus strand sarco(endo)plasmic reticulum-type calcium ATPase [Heliothis virescens]	1.210	Up	0.00147	109.38
Molecular Function	GO:0043169	4	cation binding	0.000319959	CL1830.Contig1_All	165 1670 cytochrome P450 monooxygenase CYP6X1v1 [Lygus lineolaris]	1.586	Up	0.0423	58.03
Molecular Function	GO:0043169	4	cation binding	0.000319959	Unigene1596_All	185 700 ferritin [Triatoma infestans]	3.397	Up	0.000992	19.469
Molecular Function	GO:0043169	4	cation binding	0.000319959	CL3702.Contig2_All	2 187 cytochrome P450 monooxygenase CYP6X1v1 [Lygus lineolaris]	2.390	Up	0.000452	7.1223
Molecular Function	GO:0019842	4	vitamin binding	0.103577	Unigene3597_All	587 2269 minus strand 2-hydroxyacyl-CoA lyase 1 [Camponotus floridanus]	1.316	Up	0.00748	60.924
Molecular Function	GO:0019842	4	vitamin binding	0.103577	Unigene17035_All	5 2059 PREDICTED: fatty acid synthase-like [Acyrthosiphon pisum]	1.324	Up	0.0498	76.457
Molecular Function	GO:0019842	4	vitamin binding	0.103577	Unigene20154_All	11 520 PREDICTED: similar to thiamin pyrophosphokinase 1 [Tribolium castaneum]	1.406	Up	0.000291	18.827
Molecular Function	GO:0033961	6	cis-stilbene-oxide hydrolase activity	0.120366	Unigene6419_All	65 1402 minus strand PREDICTED: similar to juvenile hormone epoxide hydrolase [Tribolium castaneum]	1.416	Up	0.0301	51.222
Molecular Function	GO:0033961	6	cis-stilbene-oxide hydrolase activity	0.120366	Unigene3633_All	396 1748 PREDICTED: similar to juvenile hormone epoxide hydrolase [Tribolium castaneum]	1.368	Up	0.0184	51.695
Molecular Function	GO:0004252	7	serine-type endopeptidase activity	0.000695419	CL1077.Contig1_All	"1089 2804 minus strand Transmembrane protease, serine 9 [Harpegnathos saltator]"	1.244	Up	0.015	61.858
Molecular Function	GO:0004252	7	serine-type endopeptidase activity	0.000695419	Unigene13889_All	1 714 minus strand trypsin-like protease [Ranatra unicolor]	1.340	Up	0.00921	26.457
Molecular Function	GO:0004252	7	serine-type endopeptidase activity	0.000695419	CL515.Contig1_All	5 706 minus strand trypsin precursor LlSgP3 [Lygus lineolaris]	1.389	Up	0.0189	25.644
Molecular Function	GO:0004252	7	serine-type endopeptidase activity	0.000695419	Unigene18257_All	90 848 minus strand trypsin-like protease [Ranatra unicolor]	1.579	Up	0.00106	28.034
Molecular Function	GO:0004252	7	serine-type endopeptidase activity	0.000695419	Unigene18412_All	2 424 Serine proteinase stubble [Camponotus floridanus]	1.378	Up	0.0284	15.632
Molecular Function	GO:0004252	7	serine-type endopeptidase activity	0.000695419	Unigene3411_All	2 721 minus strand trypsin precursor LlSgP4 [Lygus lineolaris]	1.404	Up	0.000218	26.811
Molecular Function	GO:0004252	7	serine-type endopeptidase activity	0.000695419	CL3794.Contig2_All	76 906 trypsin precursor LlGtP1 [Lygus lineolaris]	1.540	Up	0.0022	30.773
Molecular Function	GO:0004252	7	serine-type endopeptidase activity	0.000695419	Unigene5660_All	58 1467 minus strand PREDICTED: similar to trypsin-like serine protease [Tribolium castaneum]	1.546	Up	0.0195	51.273
Molecular Function	GO:0004252	7	serine-type endopeptidase activity	0.000695419	Unigene4120_All	4 351 salivary trypsin [Triatoma infestans]	1.314	Up	0.0456	12.709
Molecular Function	GO:0004252	7	serine-type endopeptidase activity	0.000695419	Unigene1577_All	53 862 minus strand trypsin precursor LlSgP3 [Lygus lineolaris]	1.553	Up	0.00322	29.989
Molecular Function	GO:0004252	7	serine-type endopeptidase activity	0.000695419	Unigene3337_All	19 894 gluten hydrolyzing proteinase [Eurygaster integriceps]	2.590	Up	0.015	31.512
Molecular Function	GO:0004252	7	serine-type endopeptidase activity	0.000695419	Unigene20396_All	2 721 trypsin precursor LlSgP4 [Lygus lineolaris]	1.445	Up	0.0342	26.721
Molecular Function	GO:0004252	7	serine-type endopeptidase activity	0.000695419	Unigene11900_All	2 547 serine protease [Laccotrephes japonensis]	1.229	Up	0.0172	19.828
Molecular Function	GO:0004252	7	serine-type endopeptidase activity	0.000695419	CL184.Contig3_All	103 984 minus strand secreted salivary trypsin [Triatoma matogrossensis]	2.170	Up	0.00485	32.214
Molecular Function	GO:0004252	7	serine-type endopeptidase activity	0.000695419	Unigene8582_All	20 1189 PREDICTED: serine protease snake-like [Bombus impatiens]	1.856	Up	0.0406	42.675
Molecular Function	GO:0004252	7	serine-type endopeptidase activity	0.000695419	Unigene2476_All	9 2690 minus strand Neurotrypsin [Camponotus floridanus]	1.318	Up	0.000327	98.5
Molecular Function	GO:0016701	4	oxidoreductase activity, acting on single donors with incorporation of molecular oxygen	0.401576	Unigene15870_All	"163 693 minus strand 1,2-dihydroxy-3-keto-5-methylthiopentene dioxygenase [Camponotus floridanus]"	1.612	Up	0.0179	21.215
Molecular Function	GO:0016701	4	oxidoreductase activity, acting on single donors with incorporation of molecular oxygen	0.401576	CL1943.Contig1_All	22 1164 4-hydroxyphenylpyruvate dioxygenase [Aedes aegypti] >gi|108868917|gb|EAT33142.1| 4-hydroxyphenylpyruvate dioxygenase [Aedes aegypti]	1.999	Up	0.0242	43.722
Molecular Function	GO:0051287	6	NAD binding	0.582824	Unigene7149_All	45 1463 minus strand PREDICTED: UDP-glucose 6-dehydrogenase-like [Bombus terrestris] >gi|350400065|ref|XP_003485726.1| PREDICTED: UDP-glucose 6-dehydrogenase-like [Bombus impatiens]	1.321	Up	0.0228	52.614
Molecular Function	GO:0051287	6	NAD binding	0.582824	CL880.Contig3_All	1 816 PREDICTED: adenosylhomocysteinase-like isoform 2 [Bombus terrestris]	1.295	Up	0.00216	30.267
Molecular Function	GO:0051287	6	NAD binding	0.582824	CL880.Contig1_All	190 1272 minus strand PREDICTED: adenosylhomocysteinase A-like [Anolis carolinensis]	1.216	Up	0.0144	39.899
Molecular Function	GO:0017171	4	serine hydrolase activity	3.24974e-05	CL1077.Contig1_All	"1089 2804 minus strand Transmembrane protease, serine 9 [Harpegnathos saltator]"	1.244	Up	0.015	61.858
Molecular Function	GO:0017171	4	serine hydrolase activity	3.24974e-05	Unigene1485_All	67 1440 PREDICTED: lysosomal Pro-X carboxypeptidase-like [Acyrthosiphon pisum]	1.547	Up	0.00112	51.627
Molecular Function	GO:0017171	4	serine hydrolase activity	3.24974e-05	Unigene18412_All	2 424 Serine proteinase stubble [Camponotus floridanus]	1.378	Up	0.0284	15.632
Molecular Function	GO:0017171	4	serine hydrolase activity	3.24974e-05	Unigene3411_All	2 721 minus strand trypsin precursor LlSgP4 [Lygus lineolaris]	1.404	Up	0.000218	26.811
Molecular Function	GO:0017171	4	serine hydrolase activity	3.24974e-05	CL3794.Contig2_All	76 906 trypsin precursor LlGtP1 [Lygus lineolaris]	1.540	Up	0.0022	30.773
Molecular Function	GO:0017171	4	serine hydrolase activity	3.24974e-05	Unigene14979_All	300 1508 venom serine carboxypeptidase [Danaus plexippus]	1.444	Up	0.0316	45.807
Molecular Function	GO:0017171	4	serine hydrolase activity	3.24974e-05	Unigene18213_All	29 1417 minus strand PREDICTED: venom serine carboxypeptidase-like [Bombus terrestris]	1.595	Up	0.0204	52.784
Molecular Function	GO:0017171	4	serine hydrolase activity	3.24974e-05	Unigene1577_All	53 862 minus strand trypsin precursor LlSgP3 [Lygus lineolaris]	1.553	Up	0.00322	29.989
Molecular Function	GO:0017171	4	serine hydrolase activity	3.24974e-05	Unigene3337_All	19 894 gluten hydrolyzing proteinase [Eurygaster integriceps]	2.590	Up	0.015	31.512
Molecular Function	GO:0017171	4	serine hydrolase activity	3.24974e-05	Unigene20396_All	2 721 trypsin precursor LlSgP4 [Lygus lineolaris]	1.445	Up	0.0342	26.721
Molecular Function	GO:0017171	4	serine hydrolase activity	3.24974e-05	Unigene11900_All	2 547 serine protease [Laccotrephes japonensis]	1.229	Up	0.0172	19.828
Molecular Function	GO:0017171	4	serine hydrolase activity	3.24974e-05	CL184.Contig3_All	103 984 minus strand secreted salivary trypsin [Triatoma matogrossensis]	2.170	Up	0.00485	32.214
Molecular Function	GO:0017171	4	serine hydrolase activity	3.24974e-05	Unigene13889_All	1 714 minus strand trypsin-like protease [Ranatra unicolor]	1.340	Up	0.00921	26.457
Molecular Function	GO:0017171	4	serine hydrolase activity	3.24974e-05	CL515.Contig1_All	5 706 minus strand trypsin precursor LlSgP3 [Lygus lineolaris]	1.389	Up	0.0189	25.644
Molecular Function	GO:0017171	4	serine hydrolase activity	3.24974e-05	Unigene18257_All	90 848 minus strand trypsin-like protease [Ranatra unicolor]	1.579	Up	0.00106	28.034
Molecular Function	GO:0017171	4	serine hydrolase activity	3.24974e-05	Unigene9896_All	240 1625 PREDICTED: similar to thymus-specific serine protease [Tribolium castaneum]	1.612	Up	0.0025	52.646
Molecular Function	GO:0017171	4	serine hydrolase activity	3.24974e-05	Unigene4120_All	4 351 salivary trypsin [Triatoma infestans]	1.314	Up	0.0456	12.709
Molecular Function	GO:0017171	4	serine hydrolase activity	3.24974e-05	Unigene5660_All	58 1467 minus strand PREDICTED: similar to trypsin-like serine protease [Tribolium castaneum]	1.546	Up	0.0195	51.273
Molecular Function	GO:0017171	4	serine hydrolase activity	3.24974e-05	Unigene2476_All	9 2690 minus strand Neurotrypsin [Camponotus floridanus]	1.318	Up	0.000327	98.5
Molecular Function	GO:0017171	4	serine hydrolase activity	3.24974e-05	Unigene8582_All	20 1189 PREDICTED: serine protease snake-like [Bombus impatiens]	1.856	Up	0.0406	42.675
Biological Process	GO:0006066	5	alcohol metabolic process	0.304464	Unigene29886_All	16 534 Dihydroxyacetone kinase [Harpegnathos saltator]	1.443	Up	0.0096	18.377
Biological Process	GO:0006066	5	alcohol metabolic process	0.304464	Unigene20124_All	164 940 minus strand Inositol monophosphatase [Camponotus floridanus]	1.218	Up	0.0213	28.584
Biological Process	GO:1901607	10	alpha-amino acid biosynthetic process	0.0171295	Unigene15870_All	"163 693 minus strand 1,2-dihydroxy-3-keto-5-methylthiopentene dioxygenase [Camponotus floridanus]"	1.612	Up	0.0179	21.215
Biological Process	GO:1901607	10	alpha-amino acid biosynthetic process	0.0171295	Unigene10512_All	2 3025 minus strand Putative glutamate synthase [NADPH] [Harpegnathos saltator]	1.472	Up	0.000853	109.7
Biological Process	GO:1901607	10	alpha-amino acid biosynthetic process	0.0171295	Unigene1610_All	96 899 PREDICTED: similar to GA19292-PA [Tribolium castaneum]	1.232	Up	0.0367	28.416
Biological Process	GO:1901607	10	alpha-amino acid biosynthetic process	0.0171295	CL1926.Contig1_All	280 2487 PREDICTED: delta-1-pyrroline-5-carboxylate synthase-like [Nasonia vitripennis]	1.272	Up	0.00939	79.601
Biological Process	GO:1901607	10	alpha-amino acid biosynthetic process	0.0171295	Unigene1445_All	78 878 minus strand PREDICTED: similar to pyrroline-5-carboxylate reductase [Tribolium castaneum]	1.625	Up	0.0121	28.223
Biological Process	GO:0055065	8	metal ion homeostasis	0.080959	Unigene17997_All	92 793 minus strand ferritin subunit (glycosylated) [Nilaparvata lugens]	1.635	Up	0.00124	26.496
Biological Process	GO:0055065	8	metal ion homeostasis	0.080959	Unigene9695_All	373 897 minus strand PREDICTED: ferritin subunit-like [Bombus impatiens]	1.563	Up	0.0154	20.212
Biological Process	GO:0055065	8	metal ion homeostasis	0.080959	Unigene1596_All	185 700 ferritin [Triatoma infestans]	3.397	Up	0.000992	19.469
Biological Process	GO:0072527	5	pyrimidine-containing compound metabolic process	0.309693	Unigene16241_All	156 752 minus strand PREDICTED: UMP-CMP kinase-like isoform 2 [Acyrthosiphon pisum]	1.204	Up	0.0103	22.549
Biological Process	GO:0072527	5	pyrimidine-containing compound metabolic process	0.309693	CL595.Contig1_All	22 3018 minus strand PREDICTED: dihydropyrimidine dehydrogenase [NADP+]-like isoform 1 [Apis mellifera]	1.395	Up	0.00185	109.55
Biological Process	GO:0072527	5	pyrimidine-containing compound metabolic process	0.309693	Unigene20154_All	11 520 PREDICTED: similar to thiamin pyrophosphokinase 1 [Tribolium castaneum]	1.406	Up	0.000291	18.827
Biological Process	GO:0019439	5	aromatic compound catabolic process	0.25278	Unigene623_All	2 1021 minus strand PREDICTED: uridine phosphorylase 1-like [Apis mellifera]	1.289	Up	0.00816	38.488
Biological Process	GO:0019439	5	aromatic compound catabolic process	0.25278	Unigene20072_All	307 864 minus strand uncharacterized protein LOC100302387 precursor [Acyrthosiphon pisum] >gi|239792635|dbj|BAH72639.1| ACYPI46563 [Acyrthosiphon pisum]	1.538	Up	0.0309	20.675
Biological Process	GO:0019439	5	aromatic compound catabolic process	0.25278	CL880.Contig3_All	1 816 PREDICTED: adenosylhomocysteinase-like isoform 2 [Bombus terrestris]	1.295	Up	0.00216	30.267
Biological Process	GO:0019439	5	aromatic compound catabolic process	0.25278	CL880.Contig1_All	190 1272 minus strand PREDICTED: adenosylhomocysteinase A-like [Anolis carolinensis]	1.216	Up	0.0144	39.899
Biological Process	GO:0009112	7	nucleobase metabolic process	0.229492	Unigene16241_All	156 752 minus strand PREDICTED: UMP-CMP kinase-like isoform 2 [Acyrthosiphon pisum]	1.204	Up	0.0103	22.549
Biological Process	GO:0009112	7	nucleobase metabolic process	0.229492	CL595.Contig1_All	22 3018 minus strand PREDICTED: dihydropyrimidine dehydrogenase [NADP+]-like isoform 1 [Apis mellifera]	1.395	Up	0.00185	109.55
Biological Process	GO:0009112	7	nucleobase metabolic process	0.229492	Unigene14482_All	89 445 minus strand Putative transthyretin-like protein ZK697.8 [Camponotus floridanus]	1.650	Up	0.00743	13.583
Biological Process	GO:0009063	9	cellular amino acid catabolic process	0.0961176	Unigene20072_All	307 864 minus strand uncharacterized protein LOC100302387 precursor [Acyrthosiphon pisum] >gi|239792635|dbj|BAH72639.1| ACYPI46563 [Acyrthosiphon pisum]	1.538	Up	0.0309	20.675
Biological Process	GO:0009063	9	cellular amino acid catabolic process	0.0961176	CL3797.Contig2_All	99 1388 PREDICTED: mitochondrial enolase superfamily member 1-like [Apis mellifera]	1.250	Up	0.0324	48.605
Biological Process	GO:0009063	9	cellular amino acid catabolic process	0.0961176	CL880.Contig3_All	1 816 PREDICTED: adenosylhomocysteinase-like isoform 2 [Bombus terrestris]	1.295	Up	0.00216	30.267
Biological Process	GO:0009063	9	cellular amino acid catabolic process	0.0961176	CL880.Contig1_All	190 1272 minus strand PREDICTED: adenosylhomocysteinase A-like [Anolis carolinensis]	1.216	Up	0.0144	39.899
Biological Process	GO:0034728	6	nucleosome organization	0.195666	Unigene11729_All	79 675 truncated histone H1 [Triatoma infestans]	1.462	Up	0.0257	19.993
Biological Process	GO:0034728	6	nucleosome organization	0.195666	Unigene201_All	251 655 PREDICTED: histone H4 [Equus caballus]	1.376	Up	0.0247	15.259
Biological Process	GO:0048519	4	negative regulation of biological process	0.516642	Unigene16237_All	130 990 F-actin-capping protein subunit alpha [Camponotus floridanus]	1.203	Up	0.0147	32.949
Biological Process	GO:0048519	4	negative regulation of biological process	0.516642	Unigene10119_All	56 325 minus strand Protein HBXIP-like protein [Harpegnathos saltator]	1.271	Up	0.00412	9.9132
Biological Process	GO:0044270	5	cellular nitrogen compound catabolic process	0.214576	Unigene623_All	2 1021 minus strand PREDICTED: uridine phosphorylase 1-like [Apis mellifera]	1.289	Up	0.00816	38.488
Biological Process	GO:0044270	5	cellular nitrogen compound catabolic process	0.214576	Unigene20072_All	307 864 minus strand uncharacterized protein LOC100302387 precursor [Acyrthosiphon pisum] >gi|239792635|dbj|BAH72639.1| ACYPI46563 [Acyrthosiphon pisum]	1.538	Up	0.0309	20.675
Biological Process	GO:0044270	5	cellular nitrogen compound catabolic process	0.214576	CL880.Contig3_All	1 816 PREDICTED: adenosylhomocysteinase-like isoform 2 [Bombus terrestris]	1.295	Up	0.00216	30.267
Biological Process	GO:0044270	5	cellular nitrogen compound catabolic process	0.214576	CL880.Contig1_All	190 1272 minus strand PREDICTED: adenosylhomocysteinase A-like [Anolis carolinensis]	1.216	Up	0.0144	39.899
Biological Process	GO:0034655	6	nucleobase-containing compound catabolic process	0.388182	Unigene623_All	2 1021 minus strand PREDICTED: uridine phosphorylase 1-like [Apis mellifera]	1.289	Up	0.00816	38.488
Biological Process	GO:0034655	6	nucleobase-containing compound catabolic process	0.388182	CL880.Contig3_All	1 816 PREDICTED: adenosylhomocysteinase-like isoform 2 [Bombus terrestris]	1.295	Up	0.00216	30.267
Biological Process	GO:0034655	6	nucleobase-containing compound catabolic process	0.388182	CL880.Contig1_All	190 1272 minus strand PREDICTED: adenosylhomocysteinase A-like [Anolis carolinensis]	1.216	Up	0.0144	39.899
Biological Process	GO:0048878	5	chemical homeostasis	0.202982	Unigene17997_All	92 793 minus strand ferritin subunit (glycosylated) [Nilaparvata lugens]	1.635	Up	0.00124	26.496
Biological Process	GO:0048878	5	chemical homeostasis	0.202982	Unigene9695_All	373 897 minus strand PREDICTED: ferritin subunit-like [Bombus impatiens]	1.563	Up	0.0154	20.212
Biological Process	GO:0048878	5	chemical homeostasis	0.202982	Unigene1596_All	185 700 ferritin [Triatoma infestans]	3.397	Up	0.000992	19.469
Biological Process	GO:0010876	4	lipid localization	0.214576	Unigene10798_All	1 2433 vitellogenin [Lethocerus deyrollei]	1.291	Up	0.0282	93.247
Biological Process	GO:0010876	4	lipid localization	0.214576	Unigene18963_All	39 1007 minus strand vitellogenin [Trigonotylus caelestialium]	1.244	Up	0.00603	37.493
Biological Process	GO:0010876	4	lipid localization	0.214576	Unigene4622_All	133 2895 minus strand PREDICTED: vitellogenin-6-like [Acyrthosiphon pisum]	1.204	Up	0.00966	105.01
Biological Process	GO:0010876	4	lipid localization	0.214576	Unigene12032_All	67 513 GD23124 [Drosophila simulans] >gi|194189815|gb|EDX03391.1| GD23124 [Drosophila simulans]	1.271	Up	0.000593	16.679
Biological Process	GO:0019751	6	polyol metabolic process	0.252028	Unigene29886_All	16 534 Dihydroxyacetone kinase [Harpegnathos saltator]	1.443	Up	0.0096	18.377
Biological Process	GO:0019751	6	polyol metabolic process	0.252028	Unigene20124_All	164 940 minus strand Inositol monophosphatase [Camponotus floridanus]	1.218	Up	0.0213	28.584
Biological Process	GO:0044283	5	small molecule biosynthetic process	0.111972	Unigene15870_All	"163 693 minus strand 1,2-dihydroxy-3-keto-5-methylthiopentene dioxygenase [Camponotus floridanus]"	1.612	Up	0.0179	21.215
Biological Process	GO:0044283	5	small molecule biosynthetic process	0.111972	Unigene10512_All	2 3025 minus strand Putative glutamate synthase [NADPH] [Harpegnathos saltator]	1.472	Up	0.000853	109.7
Biological Process	GO:0044283	5	small molecule biosynthetic process	0.111972	Unigene1610_All	96 899 PREDICTED: similar to GA19292-PA [Tribolium castaneum]	1.232	Up	0.0367	28.416
Biological Process	GO:0044283	5	small molecule biosynthetic process	0.111972	CL1926.Contig1_All	280 2487 PREDICTED: delta-1-pyrroline-5-carboxylate synthase-like [Nasonia vitripennis]	1.272	Up	0.00939	79.601
Biological Process	GO:0044283	5	small molecule biosynthetic process	0.111972	Unigene131_All	211 1482 Uncharacterized aarF domain-containing protein kinase 1 [Camponotus floridanus]	1.292	Up	0.0228	47.001
Biological Process	GO:0044283	5	small molecule biosynthetic process	0.111972	Unigene1445_All	78 878 minus strand PREDICTED: similar to pyrroline-5-carboxylate reductase [Tribolium castaneum]	1.625	Up	0.0121	28.223
Biological Process	GO:0009164	8	nucleoside catabolic process	0.398627	CL880.Contig3_All	1 816 PREDICTED: adenosylhomocysteinase-like isoform 2 [Bombus terrestris]	1.295	Up	0.00216	30.267
Biological Process	GO:0009164	8	nucleoside catabolic process	0.398627	CL880.Contig1_All	190 1272 minus strand PREDICTED: adenosylhomocysteinase A-like [Anolis carolinensis]	1.216	Up	0.0144	39.899
Biological Process	GO:0019318	7	hexose metabolic process	0.710017	Unigene11963_All	220 1251 minus strand PREDICTED: probable galactose-1-phosphate uridylyltransferase-like [Acyrthosiphon pisum]	1.406	Up	0.0177	40.388
Biological Process	GO:0019318	7	hexose metabolic process	0.710017	CL4198.Contig1_All	67 924 minus strand PREDICTED: similar to galactokinase 1 [Strongylocentrotus purpuratus] >gi|115965341|ref|XP_001187174.1| PREDICTED: similar to galactokinase 1 [Strongylocentrotus purpuratus]	1.248	Up	0.0259	31.249
Biological Process	GO:0046498	10	S-adenosylhomocysteine metabolic process	0.353246	CL880.Contig3_All	1 816 PREDICTED: adenosylhomocysteinase-like isoform 2 [Bombus terrestris]	1.295	Up	0.00216	30.267
Biological Process	GO:0046498	10	S-adenosylhomocysteine metabolic process	0.353246	CL880.Contig1_All	190 1272 minus strand PREDICTED: adenosylhomocysteinase A-like [Anolis carolinensis]	1.216	Up	0.0144	39.899
Biological Process	GO:0016053	6	organic acid biosynthetic process	0.115239	Unigene15870_All	"163 693 minus strand 1,2-dihydroxy-3-keto-5-methylthiopentene dioxygenase [Camponotus floridanus]"	1.612	Up	0.0179	21.215
Biological Process	GO:0016053	6	organic acid biosynthetic process	0.115239	Unigene10512_All	2 3025 minus strand Putative glutamate synthase [NADPH] [Harpegnathos saltator]	1.472	Up	0.000853	109.7
Biological Process	GO:0016053	6	organic acid biosynthetic process	0.115239	Unigene1610_All	96 899 PREDICTED: similar to GA19292-PA [Tribolium castaneum]	1.232	Up	0.0367	28.416
Biological Process	GO:0016053	6	organic acid biosynthetic process	0.115239	CL1926.Contig1_All	280 2487 PREDICTED: delta-1-pyrroline-5-carboxylate synthase-like [Nasonia vitripennis]	1.272	Up	0.00939	79.601
Biological Process	GO:0016053	6	organic acid biosynthetic process	0.115239	Unigene1445_All	78 878 minus strand PREDICTED: similar to pyrroline-5-carboxylate reductase [Tribolium castaneum]	1.625	Up	0.0121	28.223
Biological Process	GO:0006520	8	cellular amino acid metabolic process	0.0956592	CL2199.Contig1_All	107 751 minus strand AGAP002898-PC [Anopheles gambiae str. PEST] >gi|347968788|ref|XP_003436291.1| AGAP002898-PD [Anopheles gambiae str. PEST] >gi|333467833|gb|EGK96714.1| AGAP002898-PC [Anopheles gambiae str. PEST] >gi|333467834|gb|EGK96715.1| AGAP002898-PD [Anopheles gambiae str. PEST]	1.398	Up	0.0322	24.81
Biological Process	GO:0006520	8	cellular amino acid metabolic process	0.0956592	Unigene10512_All	2 3025 minus strand Putative glutamate synthase [NADPH] [Harpegnathos saltator]	1.472	Up	0.000853	109.7
Biological Process	GO:0006520	8	cellular amino acid metabolic process	0.0956592	Unigene20072_All	307 864 minus strand uncharacterized protein LOC100302387 precursor [Acyrthosiphon pisum] >gi|239792635|dbj|BAH72639.1| ACYPI46563 [Acyrthosiphon pisum]	1.538	Up	0.0309	20.675
Biological Process	GO:0006520	8	cellular amino acid metabolic process	0.0956592	Unigene1610_All	96 899 PREDICTED: similar to GA19292-PA [Tribolium castaneum]	1.232	Up	0.0367	28.416
Biological Process	GO:0006520	8	cellular amino acid metabolic process	0.0956592	CL3797.Contig2_All	99 1388 PREDICTED: mitochondrial enolase superfamily member 1-like [Apis mellifera]	1.250	Up	0.0324	48.605
Biological Process	GO:0006520	8	cellular amino acid metabolic process	0.0956592	CL1926.Contig1_All	280 2487 PREDICTED: delta-1-pyrroline-5-carboxylate synthase-like [Nasonia vitripennis]	1.272	Up	0.00939	79.601
Biological Process	GO:0006520	8	cellular amino acid metabolic process	0.0956592	CL880.Contig3_All	1 816 PREDICTED: adenosylhomocysteinase-like isoform 2 [Bombus terrestris]	1.295	Up	0.00216	30.267
Biological Process	GO:0006520	8	cellular amino acid metabolic process	0.0956592	CL750.Contig1_All	387 1769 minus strand PREDICTED: similar to 4-aminobutyrate aminotransferase [Tribolium castaneum]	1.772	Up	0.000295	51.43
Biological Process	GO:0006520	8	cellular amino acid metabolic process	0.0956592	CL1943.Contig1_All	22 1164 4-hydroxyphenylpyruvate dioxygenase [Aedes aegypti] >gi|108868917|gb|EAT33142.1| 4-hydroxyphenylpyruvate dioxygenase [Aedes aegypti]	1.999	Up	0.0242	43.722
Biological Process	GO:0006520	8	cellular amino acid metabolic process	0.0956592	Unigene15870_All	"163 693 minus strand 1,2-dihydroxy-3-keto-5-methylthiopentene dioxygenase [Camponotus floridanus]"	1.612	Up	0.0179	21.215
Biological Process	GO:0006520	8	cellular amino acid metabolic process	0.0956592	CL880.Contig1_All	190 1272 minus strand PREDICTED: adenosylhomocysteinase A-like [Anolis carolinensis]	1.216	Up	0.0144	39.899
Biological Process	GO:0006520	8	cellular amino acid metabolic process	0.0956592	Unigene1445_All	78 878 minus strand PREDICTED: similar to pyrroline-5-carboxylate reductase [Tribolium castaneum]	1.625	Up	0.0121	28.223
Biological Process	GO:0071824	5	protein-DNA complex subunit organization	0.195666	Unigene11729_All	79 675 truncated histone H1 [Triatoma infestans]	1.462	Up	0.0257	19.993
Biological Process	GO:0071824	5	protein-DNA complex subunit organization	0.195666	Unigene201_All	251 655 PREDICTED: histone H4 [Equus caballus]	1.376	Up	0.0247	15.259
Biological Process	GO:0006561	12	proline biosynthetic process	0.0265819	Unigene1610_All	96 899 PREDICTED: similar to GA19292-PA [Tribolium castaneum]	1.232	Up	0.0367	28.416
Biological Process	GO:0006561	12	proline biosynthetic process	0.0265819	CL1926.Contig1_All	280 2487 PREDICTED: delta-1-pyrroline-5-carboxylate synthase-like [Nasonia vitripennis]	1.272	Up	0.00939	79.601
Biological Process	GO:0006561	12	proline biosynthetic process	0.0265819	Unigene1445_All	78 878 minus strand PREDICTED: similar to pyrroline-5-carboxylate reductase [Tribolium castaneum]	1.625	Up	0.0121	28.223
Biological Process	GO:0055114	4	oxidation-reduction process	4.77748e-10	CL1926.Contig1_All	280 2487 PREDICTED: delta-1-pyrroline-5-carboxylate synthase-like [Nasonia vitripennis]	1.272	Up	0.00939	79.601
Biological Process	GO:0055114	4	oxidation-reduction process	4.77748e-10	Unigene33048_All	"2 592 minus strand PREDICTED: succinate-semialdehyde dehydrogenase, mitochondrial-like isoform 1 [Acyrthosiphon pisum]"	1.223	Up	0.0185	21.547
Biological Process	GO:0055114	4	oxidation-reduction process	4.77748e-10	Unigene7913_All	110 1042 minus strand PREDICTED: alcohol dehydrogenase [NADP+] A-like [Nasonia vitripennis]	1.660	Up	0.0317	35.341
Biological Process	GO:0055114	4	oxidation-reduction process	4.77748e-10	CL3383.Contig3_All	152 1546 minus strand PREDICTED: peroxisomal N(1)-acetyl-spermine/spermidine oxidase-like [Bombus terrestris]	1.281	Up	0.00732	52.216
Biological Process	GO:0055114	4	oxidation-reduction process	4.77748e-10	Unigene3691_All	37 1200 minus strand dimethylaniline monooxygenase 5 [Culex quinquefasciatus] >gi|167875553|gb|EDS38936.1| dimethylaniline monooxygenase 5 [Culex quinquefasciatus]	1.223	Up	0.02	45.292
Biological Process	GO:0055114	4	oxidation-reduction process	4.77748e-10	Unigene20256_All	78 1526 cytochrome P450 CYP397A1V2 [Cimex lectularius]	1.462	Up	0.00685	55.796
Biological Process	GO:0055114	4	oxidation-reduction process	4.77748e-10	Unigene15870_All	"163 693 minus strand 1,2-dihydroxy-3-keto-5-methylthiopentene dioxygenase [Camponotus floridanus]"	1.612	Up	0.0179	21.215
Biological Process	GO:0055114	4	oxidation-reduction process	4.77748e-10	Unigene18209_All	76 1596 PREDICTED: probable cytochrome P450 6a14-like isoform 2 [Bombus terrestris]	1.215	Up	0.00779	58.57
Biological Process	GO:0055114	4	oxidation-reduction process	4.77748e-10	Unigene1526_All	11 931 minus strand PREDICTED: NADH-cytochrome b5 reductase 2-like [Bombus terrestris]	1.247	Up	0.0203	34.507
Biological Process	GO:0055114	4	oxidation-reduction process	4.77748e-10	Unigene12673_All	106 1587 minus strand cytochrome P450 monooxygenase CYP6X1v1 [Lygus lineolaris]	1.568	Up	0.00488	57.101
Biological Process	GO:0055114	4	oxidation-reduction process	4.77748e-10	Unigene20257_All	241 1761 minus strand cytochrome P450 CYP6AX1 protein [Nilaparvata lugens]	1.775	Up	0.00642	58.215
Biological Process	GO:0055114	4	oxidation-reduction process	4.77748e-10	Unigene131_All	211 1482 Uncharacterized aarF domain-containing protein kinase 1 [Camponotus floridanus]	1.292	Up	0.0228	47.001
Biological Process	GO:0055114	4	oxidation-reduction process	4.77748e-10	Unigene1445_All	78 878 minus strand PREDICTED: similar to pyrroline-5-carboxylate reductase [Tribolium castaneum]	1.625	Up	0.0121	28.223
Biological Process	GO:0055114	4	oxidation-reduction process	4.77748e-10	Unigene34324_All	46 1053 minus strand PREDICTED: prostaglandin reductase 1-like [Nasonia vitripennis]	1.206	Up	0.0071	36.702
Biological Process	GO:0055114	4	oxidation-reduction process	4.77748e-10	CL3965.Contig2_All	136 1092 minus strand PREDICTED: alcohol dehydrogenase [NADP+] A-like [Apis mellifera]	1.264	Up	0.00425	36.218
Biological Process	GO:0055114	4	oxidation-reduction process	4.77748e-10	Unigene10512_All	2 3025 minus strand Putative glutamate synthase [NADPH] [Harpegnathos saltator]	1.472	Up	0.000853	109.7
Biological Process	GO:0055114	4	oxidation-reduction process	4.77748e-10	Unigene8465_All	23 1945 minus strand PREDICTED: aldehyde oxidase-like [Bombus terrestris]	2.113	Up	0.00602	71.07
Biological Process	GO:0055114	4	oxidation-reduction process	4.77748e-10	Unigene1610_All	96 899 PREDICTED: similar to GA19292-PA [Tribolium castaneum]	1.232	Up	0.0367	28.416
Biological Process	GO:0055114	4	oxidation-reduction process	4.77748e-10	CL3702.Contig1_All	256 1623 minus strand PREDICTED: similar to cytochrome P450 [Tribolium castaneum]	1.469	Up	0.00281	52.65
Biological Process	GO:0055114	4	oxidation-reduction process	4.77748e-10	CL1936.Contig1_All	6 1436 CYP4CE1 protein [Nilaparvata lugens]	1.719	Up	0.0196	54.836
Biological Process	GO:0055114	4	oxidation-reduction process	4.77748e-10	Unigene18206_All	130 1602 PREDICTED: similar to cytochrome P450 [Tribolium castaneum]	1.490	Up	0.00515	56.677
Biological Process	GO:0055114	4	oxidation-reduction process	4.77748e-10	Unigene7149_All	45 1463 minus strand PREDICTED: UDP-glucose 6-dehydrogenase-like [Bombus terrestris] >gi|350400065|ref|XP_003485726.1| PREDICTED: UDP-glucose 6-dehydrogenase-like [Bombus impatiens]	1.321	Up	0.0228	52.614
Biological Process	GO:0055114	4	oxidation-reduction process	4.77748e-10	Unigene5734_All	92 1699 cytochrome P450 [Leptinotarsa decemlineata]	1.573	Up	0.0412	62.532
Biological Process	GO:0055114	4	oxidation-reduction process	4.77748e-10	CL1079.Contig2_All	235 1698 cytochrome P450 [Hodotermopsis sjoestedti]	2.139	Up	0.0001	55.722
Biological Process	GO:0055114	4	oxidation-reduction process	4.77748e-10	Unigene1483_All	133 1569 PREDICTED: cytochrome P450 6a2-like [Bombus impatiens]	1.402	Up	0.00371	55.123
Biological Process	GO:0055114	4	oxidation-reduction process	4.77748e-10	Unigene4258_All	335 1672 minus strand GJ17765 [Drosophila virilis] >gi|194149265|gb|EDW64963.1| GJ17765 [Drosophila virilis]	1.227	Up	0.00714	51.489
Biological Process	GO:0055114	4	oxidation-reduction process	4.77748e-10	Unigene8711_All	78 1565 minus strand cytochrome P450 [Nilaparvata lugens]	4.762	Up	0.0011	56.837
Biological Process	GO:0055114	4	oxidation-reduction process	4.77748e-10	Unigene11805_All	217 678 superoxide dismutase [Triatoma infestans]	1.311	Up	0.0318	15.832
Biological Process	GO:0055114	4	oxidation-reduction process	4.77748e-10	Unigene16082_All	62 1063 minus strand PREDICTED: prostaglandin reductase 1-like [Nasonia vitripennis]	1.499	Up	0.0269	36.296
Biological Process	GO:0055114	4	oxidation-reduction process	4.77748e-10	Unigene14958_All	206 616 Cu/Zn superoxide dismutase [Cavia porcellus]	1.870	Up	0.024	14.147
Biological Process	GO:0055114	4	oxidation-reduction process	4.77748e-10	Unigene14646_All	35 4117 minus strand PREDICTED: xanthine dehydrogenase-like [Bombus terrestris]	1.201	Up	0.00947	150.96
Biological Process	GO:0055114	4	oxidation-reduction process	4.77748e-10	Unigene14700_All	93 1583 minus strand cytochrome P450 CYP6AX1 protein [Nilaparvata lugens]	1.404	Up	0.0488	57.202
Biological Process	GO:0055114	4	oxidation-reduction process	4.77748e-10	CL2752.Contig2_All	63 1547 cytochrome P450 monooxygenase CYP6X1v1 [Lygus lineolaris]	2.624	Up	0.00165	57.102
Biological Process	GO:0055114	4	oxidation-reduction process	4.77748e-10	CL1943.Contig1_All	22 1164 4-hydroxyphenylpyruvate dioxygenase [Aedes aegypti] >gi|108868917|gb|EAT33142.1| 4-hydroxyphenylpyruvate dioxygenase [Aedes aegypti]	1.999	Up	0.0242	43.722
Biological Process	GO:0055114	4	oxidation-reduction process	4.77748e-10	Unigene14067_All	66 1544 catalase [Schistocerca gregaria]	1.291	Up	0.0103	55.613
Biological Process	GO:0055114	4	oxidation-reduction process	4.77748e-10	Unigene2139_All	163 2151 minus strand PREDICTED: similar to acyl-CoA oxidase [Tribolium castaneum]	1.232	Up	0.000523	75.236
Biological Process	GO:0055114	4	oxidation-reduction process	4.77748e-10	Unigene22765_All	84 365 minus strand GMP reductase 1 [Harpegnathos saltator]	1.285	Up	0.00379	10.833
Biological Process	GO:0055114	4	oxidation-reduction process	4.77748e-10	CL1001.Contig1_All	127 1665 cytochrome P450 4A6 [Culex quinquefasciatus] >gi|167881331|gb|EDS44714.1| cytochrome P450 4A6 [Culex quinquefasciatus]	1.336	Up	0.0101	59.313
Biological Process	GO:0055114	4	oxidation-reduction process	4.77748e-10	Unigene311_All	133 2205 minus strand PREDICTED: similar to GA17312-PA [Tribolium castaneum]	1.356	Up	0.0137	79.675
Biological Process	GO:0055114	4	oxidation-reduction process	4.77748e-10	Unigene4604_All	30 1343 PREDICTED: fatty acid synthase-like [Acyrthosiphon pisum]	1.388	Up	0.0288	48.523
Biological Process	GO:0055114	4	oxidation-reduction process	4.77748e-10	CL3790.Contig3_All	47 1576 minus strand cytochrome P450 6BQ2 [Tribolium castaneum]	2.013	Up	0.00792	59.483
Biological Process	GO:0055114	4	oxidation-reduction process	4.77748e-10	CL1278.Contig1_All	103 1569 RecName: Full=Cytochrome P450 4C1; AltName: Full=CYPIVC1 >gi|155947|gb|AAA27819.1| cytochrome P450 [Blaberus discoidalis]	1.912	Up	0.0252	55.826
Biological Process	GO:0055114	4	oxidation-reduction process	4.77748e-10	Unigene33534_All	19 906 Putative glutamate synthase [NADPH] [Harpegnathos saltator]	1.359	Up	0.00258	32.998
Biological Process	GO:0055114	4	oxidation-reduction process	4.77748e-10	CL3790.Contig1_All	2 1237 minus strand cytochrome P450 [Aedes aegypti] >gi|108874803|gb|EAT39028.1| cytochrome P450 [Aedes aegypti]	2.128	Up	8.57e-05	48.455
Biological Process	GO:0055114	4	oxidation-reduction process	4.77748e-10	Unigene4441_All	116 694 minus strand PREDICTED: protein CREG2-like [Acyrthosiphon pisum]	2.262	Up	0.00101	21.845
Biological Process	GO:0055114	4	oxidation-reduction process	4.77748e-10	Unigene1450_All	64 984 stearoyl-coa desaturase [Aedes aegypti] >gi|108880849|gb|EAT45074.1| stearoyl-coa desaturase [Aedes aegypti]	1.281	Up	0.0138	34.976
Biological Process	GO:0055114	4	oxidation-reduction process	4.77748e-10	Unigene18282_All	400 1320 PREDICTED: similar to CG6084 CG6084-PA [Tribolium castaneum]	1.380	Up	1.84e-05	34.703
Biological Process	GO:0055114	4	oxidation-reduction process	4.77748e-10	Unigene2516_All	109 1032 PREDICTED: alcohol dehydrogenase [NADP+] A-like [Bombus impatiens]	1.712	Up	0.0497	35.511
Biological Process	GO:0055114	4	oxidation-reduction process	4.77748e-10	Unigene9975_All	57 1100 minus strand sorbitol dehydrogenase [Pyrrhocoris apterus]	1.344	Up	0.000184	37.608
Biological Process	GO:0055114	4	oxidation-reduction process	4.77748e-10	CL1830.Contig1_All	165 1670 cytochrome P450 monooxygenase CYP6X1v1 [Lygus lineolaris]	1.586	Up	0.0423	58.03
Biological Process	GO:0055114	4	oxidation-reduction process	4.77748e-10	CL595.Contig1_All	22 3018 minus strand PREDICTED: dihydropyrimidine dehydrogenase [NADP+]-like isoform 1 [Apis mellifera]	1.395	Up	0.00185	109.55
Biological Process	GO:0055114	4	oxidation-reduction process	4.77748e-10	CL3702.Contig2_All	2 187 cytochrome P450 monooxygenase CYP6X1v1 [Lygus lineolaris]	2.390	Up	0.000452	7.1223
Biological Process	GO:0098771	7	inorganic ion homeostasis	0.080959	Unigene17997_All	92 793 minus strand ferritin subunit (glycosylated) [Nilaparvata lugens]	1.635	Up	0.00124	26.496
Biological Process	GO:0098771	7	inorganic ion homeostasis	0.080959	Unigene9695_All	373 897 minus strand PREDICTED: ferritin subunit-like [Bombus impatiens]	1.563	Up	0.0154	20.212
Biological Process	GO:0098771	7	inorganic ion homeostasis	0.080959	Unigene1596_All	185 700 ferritin [Triatoma infestans]	3.397	Up	0.000992	19.469
Biological Process	GO:0044723	5	single-organism carbohydrate metabolic process	0.273238	Unigene311_All	133 2205 minus strand PREDICTED: similar to GA17312-PA [Tribolium castaneum]	1.356	Up	0.0137	79.675
Biological Process	GO:0044723	5	single-organism carbohydrate metabolic process	0.273238	Unigene11963_All	220 1251 minus strand PREDICTED: probable galactose-1-phosphate uridylyltransferase-like [Acyrthosiphon pisum]	1.406	Up	0.0177	40.388
Biological Process	GO:0044723	5	single-organism carbohydrate metabolic process	0.273238	CL4198.Contig1_All	67 924 minus strand PREDICTED: similar to galactokinase 1 [Strongylocentrotus purpuratus] >gi|115965341|ref|XP_001187174.1| PREDICTED: similar to galactokinase 1 [Strongylocentrotus purpuratus]	1.248	Up	0.0259	31.249
Biological Process	GO:0044723	5	single-organism carbohydrate metabolic process	0.273238	Unigene29886_All	16 534 Dihydroxyacetone kinase [Harpegnathos saltator]	1.443	Up	0.0096	18.377
Biological Process	GO:0044723	5	single-organism carbohydrate metabolic process	0.273238	Unigene20124_All	164 940 minus strand Inositol monophosphatase [Camponotus floridanus]	1.218	Up	0.0213	28.584
Biological Process	GO:0046394	8	carboxylic acid biosynthetic process	0.115239	Unigene15870_All	"163 693 minus strand 1,2-dihydroxy-3-keto-5-methylthiopentene dioxygenase [Camponotus floridanus]"	1.612	Up	0.0179	21.215
Biological Process	GO:0046394	8	carboxylic acid biosynthetic process	0.115239	Unigene10512_All	2 3025 minus strand Putative glutamate synthase [NADPH] [Harpegnathos saltator]	1.472	Up	0.000853	109.7
Biological Process	GO:0046394	8	carboxylic acid biosynthetic process	0.115239	Unigene1610_All	96 899 PREDICTED: similar to GA19292-PA [Tribolium castaneum]	1.232	Up	0.0367	28.416
Biological Process	GO:0046394	8	carboxylic acid biosynthetic process	0.115239	CL1926.Contig1_All	280 2487 PREDICTED: delta-1-pyrroline-5-carboxylate synthase-like [Nasonia vitripennis]	1.272	Up	0.00939	79.601
Biological Process	GO:0046394	8	carboxylic acid biosynthetic process	0.115239	Unigene1445_All	78 878 minus strand PREDICTED: similar to pyrroline-5-carboxylate reductase [Tribolium castaneum]	1.625	Up	0.0121	28.223
Biological Process	GO:0065009	3	regulation of molecular function	0.256217	Unigene1580_All	90 1082 minus strand cathepsin B [Branchiostoma belcheri tsingtauense]	2.446	Up	0.00759	35.94
Biological Process	GO:0065009	3	regulation of molecular function	0.256217	Unigene18171_All	96 1094 minus strand cathepsin b [Aedes aegypti] >gi|54289254|gb|AAV31917.1| lysosomal cathepsin B [Aedes aegypti] >gi|108874249|gb|EAT38474.1| cathepsin b [Aedes aegypti]	1.693	Up	0.00769	36.55
Biological Process	GO:0065009	3	regulation of molecular function	0.256217	Unigene10119_All	56 325 minus strand Protein HBXIP-like protein [Harpegnathos saltator]	1.271	Up	0.00412	9.9132
Biological Process	GO:0006325	5	chromatin organization	0.516642	Unigene11729_All	79 675 truncated histone H1 [Triatoma infestans]	1.462	Up	0.0257	19.993
Biological Process	GO:0006325	5	chromatin organization	0.516642	Unigene201_All	251 655 PREDICTED: histone H4 [Equus caballus]	1.376	Up	0.0247	15.259
Biological Process	GO:0046434	6	organophosphate catabolic process	0.398627	Unigene623_All	2 1021 minus strand PREDICTED: uridine phosphorylase 1-like [Apis mellifera]	1.289	Up	0.00816	38.488
Biological Process	GO:0046434	6	organophosphate catabolic process	0.398627	Unigene20124_All	164 940 minus strand Inositol monophosphatase [Camponotus floridanus]	1.218	Up	0.0213	28.584
Biological Process	GO:0072528	6	pyrimidine-containing compound biosynthetic process	0.229492	Unigene16241_All	156 752 minus strand PREDICTED: UMP-CMP kinase-like isoform 2 [Acyrthosiphon pisum]	1.204	Up	0.0103	22.549
Biological Process	GO:0072528	6	pyrimidine-containing compound biosynthetic process	0.229492	CL595.Contig1_All	22 3018 minus strand PREDICTED: dihydropyrimidine dehydrogenase [NADP+]-like isoform 1 [Apis mellifera]	1.395	Up	0.00185	109.55
Biological Process	GO:0072528	6	pyrimidine-containing compound biosynthetic process	0.229492	Unigene20154_All	11 520 PREDICTED: similar to thiamin pyrophosphokinase 1 [Tribolium castaneum]	1.406	Up	0.000291	18.827
Biological Process	GO:0072593	4	reactive oxygen species metabolic process	0.398627	Unigene14958_All	206 616 Cu/Zn superoxide dismutase [Cavia porcellus]	1.870	Up	0.024	14.147
Biological Process	GO:0072593	4	reactive oxygen species metabolic process	0.398627	Unigene11805_All	217 678 superoxide dismutase [Triatoma infestans]	1.311	Up	0.0318	15.832
Biological Process	GO:0055080	7	cation homeostasis	0.080959	Unigene17997_All	92 793 minus strand ferritin subunit (glycosylated) [Nilaparvata lugens]	1.635	Up	0.00124	26.496
Biological Process	GO:0055080	7	cation homeostasis	0.080959	Unigene9695_All	373 897 minus strand PREDICTED: ferritin subunit-like [Bombus impatiens]	1.563	Up	0.0154	20.212
Biological Process	GO:0055080	7	cation homeostasis	0.080959	Unigene1596_All	185 700 ferritin [Triatoma infestans]	3.397	Up	0.000992	19.469
Biological Process	GO:0005996	6	monosaccharide metabolic process	0.730466	Unigene11963_All	220 1251 minus strand PREDICTED: probable galactose-1-phosphate uridylyltransferase-like [Acyrthosiphon pisum]	1.406	Up	0.0177	40.388
Biological Process	GO:0005996	6	monosaccharide metabolic process	0.730466	CL4198.Contig1_All	67 924 minus strand PREDICTED: similar to galactokinase 1 [Strongylocentrotus purpuratus] >gi|115965341|ref|XP_001187174.1| PREDICTED: similar to galactokinase 1 [Strongylocentrotus purpuratus]	1.248	Up	0.0259	31.249
Biological Process	GO:0009064	10	glutamine family amino acid metabolic process	0.0206344	Unigene10512_All	2 3025 minus strand Putative glutamate synthase [NADPH] [Harpegnathos saltator]	1.472	Up	0.000853	109.7
Biological Process	GO:0009064	10	glutamine family amino acid metabolic process	0.0206344	Unigene1610_All	96 899 PREDICTED: similar to GA19292-PA [Tribolium castaneum]	1.232	Up	0.0367	28.416
Biological Process	GO:0009064	10	glutamine family amino acid metabolic process	0.0206344	CL1926.Contig1_All	280 2487 PREDICTED: delta-1-pyrroline-5-carboxylate synthase-like [Nasonia vitripennis]	1.272	Up	0.00939	79.601
Biological Process	GO:0009064	10	glutamine family amino acid metabolic process	0.0206344	Unigene1445_All	78 878 minus strand PREDICTED: similar to pyrroline-5-carboxylate reductase [Tribolium castaneum]	1.625	Up	0.0121	28.223
Biological Process	GO:0019510	11	S-adenosylhomocysteine catabolic process	0.353246	CL880.Contig3_All	1 816 PREDICTED: adenosylhomocysteinase-like isoform 2 [Bombus terrestris]	1.295	Up	0.00216	30.267
Biological Process	GO:0019510	11	S-adenosylhomocysteine catabolic process	0.353246	CL880.Contig1_All	190 1272 minus strand PREDICTED: adenosylhomocysteinase A-like [Anolis carolinensis]	1.216	Up	0.0144	39.899
Biological Process	GO:1901565	5	organonitrogen compound catabolic process	0.21093	Unigene20072_All	307 864 minus strand uncharacterized protein LOC100302387 precursor [Acyrthosiphon pisum] >gi|239792635|dbj|BAH72639.1| ACYPI46563 [Acyrthosiphon pisum]	1.538	Up	0.0309	20.675
Biological Process	GO:1901565	5	organonitrogen compound catabolic process	0.21093	CL3797.Contig2_All	99 1388 PREDICTED: mitochondrial enolase superfamily member 1-like [Apis mellifera]	1.250	Up	0.0324	48.605
Biological Process	GO:1901565	5	organonitrogen compound catabolic process	0.21093	CL880.Contig3_All	1 816 PREDICTED: adenosylhomocysteinase-like isoform 2 [Bombus terrestris]	1.295	Up	0.00216	30.267
Biological Process	GO:1901565	5	organonitrogen compound catabolic process	0.21093	Unigene9717_All	118 717 PREDICTED: acidic endochitinase SP2-like [Nasonia vitripennis]	1.227	Up	0.0333	22.808
Biological Process	GO:1901565	5	organonitrogen compound catabolic process	0.21093	CL880.Contig1_All	190 1272 minus strand PREDICTED: adenosylhomocysteinase A-like [Anolis carolinensis]	1.216	Up	0.0144	39.899
Biological Process	GO:0009225	6	nucleotide-sugar metabolic process	0.304464	Unigene7893_All	127 852 minus strand phosphomannomutase [Schistosoma mansoni] >gi|353233060|emb|CCD80415.1| phosphomannomutase [Schistosoma mansoni]	1.210	Up	0.00429	27.911
Biological Process	GO:0009225	6	nucleotide-sugar metabolic process	0.304464	CL3759.Contig2_All	186 1679 UDP-glucose pyrophosphorylase [Spodoptera exigua]	1.352	Up	0.011	56.345
Biological Process	GO:0006801	5	superoxide metabolic process	0.398627	Unigene14958_All	206 616 Cu/Zn superoxide dismutase [Cavia porcellus]	1.870	Up	0.024	14.147
Biological Process	GO:0006801	5	superoxide metabolic process	0.398627	Unigene11805_All	217 678 superoxide dismutase [Triatoma infestans]	1.311	Up	0.0318	15.832
Biological Process	GO:0044272	5	sulfur compound biosynthetic process	0.550619	Unigene15870_All	"163 693 minus strand 1,2-dihydroxy-3-keto-5-methylthiopentene dioxygenase [Camponotus floridanus]"	1.612	Up	0.0179	21.215
Biological Process	GO:0044272	5	sulfur compound biosynthetic process	0.550619	Unigene20154_All	11 520 PREDICTED: similar to thiamin pyrophosphokinase 1 [Tribolium castaneum]	1.406	Up	0.000291	18.827
Biological Process	GO:0009084	11	glutamine family amino acid biosynthetic process	0.00574559	Unigene10512_All	2 3025 minus strand Putative glutamate synthase [NADPH] [Harpegnathos saltator]	1.472	Up	0.000853	109.7
Biological Process	GO:0009084	11	glutamine family amino acid biosynthetic process	0.00574559	Unigene1610_All	96 899 PREDICTED: similar to GA19292-PA [Tribolium castaneum]	1.232	Up	0.0367	28.416
Biological Process	GO:0009084	11	glutamine family amino acid biosynthetic process	0.00574559	CL1926.Contig1_All	280 2487 PREDICTED: delta-1-pyrroline-5-carboxylate synthase-like [Nasonia vitripennis]	1.272	Up	0.00939	79.601
Biological Process	GO:0009084	11	glutamine family amino acid biosynthetic process	0.00574559	Unigene1445_All	78 878 minus strand PREDICTED: similar to pyrroline-5-carboxylate reductase [Tribolium castaneum]	1.625	Up	0.0121	28.223
Biological Process	GO:0006334	9	nucleosome assembly	0.195666	Unigene11729_All	79 675 truncated histone H1 [Triatoma infestans]	1.462	Up	0.0257	19.993
Biological Process	GO:0006334	9	nucleosome assembly	0.195666	Unigene201_All	251 655 PREDICTED: histone H4 [Equus caballus]	1.376	Up	0.0247	15.259
Biological Process	GO:0042180	5	cellular ketone metabolic process	0.398627	Unigene20072_All	307 864 minus strand uncharacterized protein LOC100302387 precursor [Acyrthosiphon pisum] >gi|239792635|dbj|BAH72639.1| ACYPI46563 [Acyrthosiphon pisum]	1.538	Up	0.0309	20.675
Biological Process	GO:0042180	5	cellular ketone metabolic process	0.398627	Unigene131_All	211 1482 Uncharacterized aarF domain-containing protein kinase 1 [Camponotus floridanus]	1.292	Up	0.0228	47.001
Biological Process	GO:0044262	5	cellular carbohydrate metabolic process	0.110978	Unigene311_All	133 2205 minus strand PREDICTED: similar to GA17312-PA [Tribolium castaneum]	1.356	Up	0.0137	79.675
Biological Process	GO:0044262	5	cellular carbohydrate metabolic process	0.110978	CL4198.Contig1_All	67 924 minus strand PREDICTED: similar to galactokinase 1 [Strongylocentrotus purpuratus] >gi|115965341|ref|XP_001187174.1| PREDICTED: similar to galactokinase 1 [Strongylocentrotus purpuratus]	1.248	Up	0.0259	31.249
Biological Process	GO:0044262	5	cellular carbohydrate metabolic process	0.110978	Unigene29886_All	16 534 Dihydroxyacetone kinase [Harpegnathos saltator]	1.443	Up	0.0096	18.377
Biological Process	GO:0044262	5	cellular carbohydrate metabolic process	0.110978	Unigene20124_All	164 940 minus strand Inositol monophosphatase [Camponotus floridanus]	1.218	Up	0.0213	28.584
Biological Process	GO:0046130	10	purine ribonucleoside catabolic process	0.353246	CL880.Contig3_All	1 816 PREDICTED: adenosylhomocysteinase-like isoform 2 [Bombus terrestris]	1.295	Up	0.00216	30.267
Biological Process	GO:0046130	10	purine ribonucleoside catabolic process	0.353246	CL880.Contig1_All	190 1272 minus strand PREDICTED: adenosylhomocysteinase A-like [Anolis carolinensis]	1.216	Up	0.0144	39.899
Biological Process	GO:0030258	6	lipid modification	0.582223	Unigene2139_All	163 2151 minus strand PREDICTED: similar to acyl-CoA oxidase [Tribolium castaneum]	1.232	Up	0.000523	75.236
Biological Process	GO:0030258	6	lipid modification	0.582223	Unigene20124_All	164 940 minus strand Inositol monophosphatase [Camponotus floridanus]	1.218	Up	0.0213	28.584
Biological Process	GO:0006560	11	proline metabolic process	0.0265819	Unigene1610_All	96 899 PREDICTED: similar to GA19292-PA [Tribolium castaneum]	1.232	Up	0.0367	28.416
Biological Process	GO:0006560	11	proline metabolic process	0.0265819	CL1926.Contig1_All	280 2487 PREDICTED: delta-1-pyrroline-5-carboxylate synthase-like [Nasonia vitripennis]	1.272	Up	0.00939	79.601
Biological Process	GO:0006560	11	proline metabolic process	0.0265819	Unigene1445_All	78 878 minus strand PREDICTED: similar to pyrroline-5-carboxylate reductase [Tribolium castaneum]	1.625	Up	0.0121	28.223
Biological Process	GO:0046112	8	nucleobase biosynthetic process	0.480113	Unigene16241_All	156 752 minus strand PREDICTED: UMP-CMP kinase-like isoform 2 [Acyrthosiphon pisum]	1.204	Up	0.0103	22.549
Biological Process	GO:0046112	8	nucleobase biosynthetic process	0.480113	CL595.Contig1_All	22 3018 minus strand PREDICTED: dihydropyrimidine dehydrogenase [NADP+]-like isoform 1 [Apis mellifera]	1.395	Up	0.00185	109.55
Biological Process	GO:0006790	4	sulfur compound metabolic process	0.351116	Unigene15870_All	"163 693 minus strand 1,2-dihydroxy-3-keto-5-methylthiopentene dioxygenase [Camponotus floridanus]"	1.612	Up	0.0179	21.215
Biological Process	GO:0006790	4	sulfur compound metabolic process	0.351116	CL880.Contig3_All	1 816 PREDICTED: adenosylhomocysteinase-like isoform 2 [Bombus terrestris]	1.295	Up	0.00216	30.267
Biological Process	GO:0006790	4	sulfur compound metabolic process	0.351116	CL880.Contig1_All	190 1272 minus strand PREDICTED: adenosylhomocysteinase A-like [Anolis carolinensis]	1.216	Up	0.0144	39.899
Biological Process	GO:0006790	4	sulfur compound metabolic process	0.351116	Unigene20154_All	11 520 PREDICTED: similar to thiamin pyrophosphokinase 1 [Tribolium castaneum]	1.406	Up	0.000291	18.827
Biological Process	GO:0009072	9	aromatic amino acid family metabolic process	0.126681	CL2199.Contig1_All	107 751 minus strand AGAP002898-PC [Anopheles gambiae str. PEST] >gi|347968788|ref|XP_003436291.1| AGAP002898-PD [Anopheles gambiae str. PEST] >gi|333467833|gb|EGK96714.1| AGAP002898-PC [Anopheles gambiae str. PEST] >gi|333467834|gb|EGK96715.1| AGAP002898-PD [Anopheles gambiae str. PEST]	1.398	Up	0.0322	24.81
Biological Process	GO:0009072	9	aromatic amino acid family metabolic process	0.126681	Unigene20072_All	307 864 minus strand uncharacterized protein LOC100302387 precursor [Acyrthosiphon pisum] >gi|239792635|dbj|BAH72639.1| ACYPI46563 [Acyrthosiphon pisum]	1.538	Up	0.0309	20.675
Biological Process	GO:0009072	9	aromatic amino acid family metabolic process	0.126681	CL1943.Contig1_All	22 1164 4-hydroxyphenylpyruvate dioxygenase [Aedes aegypti] >gi|108868917|gb|EAT33142.1| 4-hydroxyphenylpyruvate dioxygenase [Aedes aegypti]	1.999	Up	0.0242	43.722
Biological Process	GO:0006869	6	lipid transport	0.177809	Unigene10798_All	1 2433 vitellogenin [Lethocerus deyrollei]	1.291	Up	0.0282	93.247
Biological Process	GO:0006869	6	lipid transport	0.177809	Unigene18963_All	39 1007 minus strand vitellogenin [Trigonotylus caelestialium]	1.244	Up	0.00603	37.493
Biological Process	GO:0006869	6	lipid transport	0.177809	Unigene4622_All	133 2895 minus strand PREDICTED: vitellogenin-6-like [Acyrthosiphon pisum]	1.204	Up	0.00966	105.01
Biological Process	GO:0006869	6	lipid transport	0.177809	Unigene12032_All	67 513 GD23124 [Drosophila simulans] >gi|194189815|gb|EDX03391.1| GD23124 [Drosophila simulans]	1.271	Up	0.000593	16.679
Biological Process	GO:0006206	8	pyrimidine nucleobase metabolic process	0.398627	Unigene16241_All	156 752 minus strand PREDICTED: UMP-CMP kinase-like isoform 2 [Acyrthosiphon pisum]	1.204	Up	0.0103	22.549
Biological Process	GO:0006206	8	pyrimidine nucleobase metabolic process	0.398627	CL595.Contig1_All	22 3018 minus strand PREDICTED: dihydropyrimidine dehydrogenase [NADP+]-like isoform 1 [Apis mellifera]	1.395	Up	0.00185	109.55
Biological Process	GO:0046916	10	cellular transition metal ion homeostasis	0.0422846	Unigene17997_All	92 793 minus strand ferritin subunit (glycosylated) [Nilaparvata lugens]	1.635	Up	0.00124	26.496
Biological Process	GO:0046916	10	cellular transition metal ion homeostasis	0.0422846	Unigene9695_All	373 897 minus strand PREDICTED: ferritin subunit-like [Bombus impatiens]	1.563	Up	0.0154	20.212
Biological Process	GO:0046916	10	cellular transition metal ion homeostasis	0.0422846	Unigene1596_All	185 700 ferritin [Triatoma infestans]	3.397	Up	0.000992	19.469
Biological Process	GO:0065004	7	protein-DNA complex assembly	0.195666	Unigene11729_All	79 675 truncated histone H1 [Triatoma infestans]	1.462	Up	0.0257	19.993
Biological Process	GO:0065004	7	protein-DNA complex assembly	0.195666	Unigene201_All	251 655 PREDICTED: histone H4 [Equus caballus]	1.376	Up	0.0247	15.259
Biological Process	GO:0046395	8	carboxylic acid catabolic process	0.0391019	Unigene2139_All	163 2151 minus strand PREDICTED: similar to acyl-CoA oxidase [Tribolium castaneum]	1.232	Up	0.000523	75.236
Biological Process	GO:0046395	8	carboxylic acid catabolic process	0.0391019	Unigene20072_All	307 864 minus strand uncharacterized protein LOC100302387 precursor [Acyrthosiphon pisum] >gi|239792635|dbj|BAH72639.1| ACYPI46563 [Acyrthosiphon pisum]	1.538	Up	0.0309	20.675
Biological Process	GO:0046395	8	carboxylic acid catabolic process	0.0391019	CL3797.Contig2_All	99 1388 PREDICTED: mitochondrial enolase superfamily member 1-like [Apis mellifera]	1.250	Up	0.0324	48.605
Biological Process	GO:0046395	8	carboxylic acid catabolic process	0.0391019	CL880.Contig3_All	1 816 PREDICTED: adenosylhomocysteinase-like isoform 2 [Bombus terrestris]	1.295	Up	0.00216	30.267
Biological Process	GO:0046395	8	carboxylic acid catabolic process	0.0391019	CL880.Contig1_All	190 1272 minus strand PREDICTED: adenosylhomocysteinase A-like [Anolis carolinensis]	1.216	Up	0.0144	39.899
Biological Process	GO:0006152	9	purine nucleoside catabolic process	0.353246	CL880.Contig3_All	1 816 PREDICTED: adenosylhomocysteinase-like isoform 2 [Bombus terrestris]	1.295	Up	0.00216	30.267
Biological Process	GO:0006152	9	purine nucleoside catabolic process	0.353246	CL880.Contig1_All	190 1272 minus strand PREDICTED: adenosylhomocysteinase A-like [Anolis carolinensis]	1.216	Up	0.0144	39.899
Biological Process	GO:0044710	3	single-organism metabolic process	8.43817e-08	CL3797.Contig2_All	99 1388 PREDICTED: mitochondrial enolase superfamily member 1-like [Apis mellifera]	1.250	Up	0.0324	48.605
Biological Process	GO:0044710	3	single-organism metabolic process	8.43817e-08	CL4198.Contig1_All	67 924 minus strand PREDICTED: similar to galactokinase 1 [Strongylocentrotus purpuratus] >gi|115965341|ref|XP_001187174.1| PREDICTED: similar to galactokinase 1 [Strongylocentrotus purpuratus]	1.248	Up	0.0259	31.249
Biological Process	GO:0044710	3	single-organism metabolic process	8.43817e-08	Unigene33048_All	"2 592 minus strand PREDICTED: succinate-semialdehyde dehydrogenase, mitochondrial-like isoform 1 [Acyrthosiphon pisum]"	1.223	Up	0.0185	21.547
Biological Process	GO:0044710	3	single-organism metabolic process	8.43817e-08	Unigene7913_All	110 1042 minus strand PREDICTED: alcohol dehydrogenase [NADP+] A-like [Nasonia vitripennis]	1.660	Up	0.0317	35.341
Biological Process	GO:0044710	3	single-organism metabolic process	8.43817e-08	Unigene20256_All	78 1526 cytochrome P450 CYP397A1V2 [Cimex lectularius]	1.462	Up	0.00685	55.796
Biological Process	GO:0044710	3	single-organism metabolic process	8.43817e-08	Unigene11963_All	220 1251 minus strand PREDICTED: probable galactose-1-phosphate uridylyltransferase-like [Acyrthosiphon pisum]	1.406	Up	0.0177	40.388
Biological Process	GO:0044710	3	single-organism metabolic process	8.43817e-08	Unigene15870_All	"163 693 minus strand 1,2-dihydroxy-3-keto-5-methylthiopentene dioxygenase [Camponotus floridanus]"	1.612	Up	0.0179	21.215
Biological Process	GO:0044710	3	single-organism metabolic process	8.43817e-08	Unigene1526_All	11 931 minus strand PREDICTED: NADH-cytochrome b5 reductase 2-like [Bombus terrestris]	1.247	Up	0.0203	34.507
Biological Process	GO:0044710	3	single-organism metabolic process	8.43817e-08	Unigene20257_All	241 1761 minus strand cytochrome P450 CYP6AX1 protein [Nilaparvata lugens]	1.775	Up	0.00642	58.215
Biological Process	GO:0044710	3	single-organism metabolic process	8.43817e-08	Unigene3586_All	215 1423 minus strand AGAP010150-PA [Anopheles gambiae str. PEST] >gi|116118456|gb|EAA13844.4| AGAP010150-PA [Anopheles gambiae str. PEST]	1.255	Up	0.0187	46.963
Biological Process	GO:0044710	3	single-organism metabolic process	8.43817e-08	Unigene34324_All	46 1053 minus strand PREDICTED: prostaglandin reductase 1-like [Nasonia vitripennis]	1.206	Up	0.0071	36.702
Biological Process	GO:0044710	3	single-organism metabolic process	8.43817e-08	Unigene1610_All	96 899 PREDICTED: similar to GA19292-PA [Tribolium castaneum]	1.232	Up	0.0367	28.416
Biological Process	GO:0044710	3	single-organism metabolic process	8.43817e-08	CL3702.Contig1_All	256 1623 minus strand PREDICTED: similar to cytochrome P450 [Tribolium castaneum]	1.469	Up	0.00281	52.65
Biological Process	GO:0044710	3	single-organism metabolic process	8.43817e-08	CL1936.Contig1_All	6 1436 CYP4CE1 protein [Nilaparvata lugens]	1.719	Up	0.0196	54.836
Biological Process	GO:0044710	3	single-organism metabolic process	8.43817e-08	Unigene18206_All	130 1602 PREDICTED: similar to cytochrome P450 [Tribolium castaneum]	1.490	Up	0.00515	56.677
Biological Process	GO:0044710	3	single-organism metabolic process	8.43817e-08	CL1079.Contig2_All	235 1698 cytochrome P450 [Hodotermopsis sjoestedti]	2.139	Up	0.0001	55.722
Biological Process	GO:0044710	3	single-organism metabolic process	8.43817e-08	Unigene8711_All	78 1565 minus strand cytochrome P450 [Nilaparvata lugens]	4.762	Up	0.0011	56.837
Biological Process	GO:0044710	3	single-organism metabolic process	8.43817e-08	Unigene20124_All	164 940 minus strand Inositol monophosphatase [Camponotus floridanus]	1.218	Up	0.0213	28.584
Biological Process	GO:0044710	3	single-organism metabolic process	8.43817e-08	Unigene14958_All	206 616 Cu/Zn superoxide dismutase [Cavia porcellus]	1.870	Up	0.024	14.147
Biological Process	GO:0044710	3	single-organism metabolic process	8.43817e-08	Unigene20072_All	307 864 minus strand uncharacterized protein LOC100302387 precursor [Acyrthosiphon pisum] >gi|239792635|dbj|BAH72639.1| ACYPI46563 [Acyrthosiphon pisum]	1.538	Up	0.0309	20.675
Biological Process	GO:0044710	3	single-organism metabolic process	8.43817e-08	CL2752.Contig2_All	63 1547 cytochrome P450 monooxygenase CYP6X1v1 [Lygus lineolaris]	2.624	Up	0.00165	57.102
Biological Process	GO:0044710	3	single-organism metabolic process	8.43817e-08	Unigene16241_All	156 752 minus strand PREDICTED: UMP-CMP kinase-like isoform 2 [Acyrthosiphon pisum]	1.204	Up	0.0103	22.549
Biological Process	GO:0044710	3	single-organism metabolic process	8.43817e-08	CL1943.Contig1_All	22 1164 4-hydroxyphenylpyruvate dioxygenase [Aedes aegypti] >gi|108868917|gb|EAT33142.1| 4-hydroxyphenylpyruvate dioxygenase [Aedes aegypti]	1.999	Up	0.0242	43.722
Biological Process	GO:0044710	3	single-organism metabolic process	8.43817e-08	CL1001.Contig1_All	127 1665 cytochrome P450 4A6 [Culex quinquefasciatus] >gi|167881331|gb|EDS44714.1| cytochrome P450 4A6 [Culex quinquefasciatus]	1.336	Up	0.0101	59.313
Biological Process	GO:0044710	3	single-organism metabolic process	8.43817e-08	Unigene311_All	133 2205 minus strand PREDICTED: similar to GA17312-PA [Tribolium castaneum]	1.356	Up	0.0137	79.675
Biological Process	GO:0044710	3	single-organism metabolic process	8.43817e-08	CL1278.Contig1_All	103 1569 RecName: Full=Cytochrome P450 4C1; AltName: Full=CYPIVC1 >gi|155947|gb|AAA27819.1| cytochrome P450 [Blaberus discoidalis]	1.912	Up	0.0252	55.826
Biological Process	GO:0044710	3	single-organism metabolic process	8.43817e-08	Unigene16122_All	229 2535 minus strand PREDICTED: similar to saposin isoform 1 [Tribolium castaneum]	1.286	Up	0.00255	86.508
Biological Process	GO:0044710	3	single-organism metabolic process	8.43817e-08	Unigene4441_All	116 694 minus strand PREDICTED: protein CREG2-like [Acyrthosiphon pisum]	2.262	Up	0.00101	21.845
Biological Process	GO:0044710	3	single-organism metabolic process	8.43817e-08	Unigene2516_All	109 1032 PREDICTED: alcohol dehydrogenase [NADP+] A-like [Bombus impatiens]	1.712	Up	0.0497	35.511
Biological Process	GO:0044710	3	single-organism metabolic process	8.43817e-08	Unigene9975_All	57 1100 minus strand sorbitol dehydrogenase [Pyrrhocoris apterus]	1.344	Up	0.000184	37.608
Biological Process	GO:0044710	3	single-organism metabolic process	8.43817e-08	CL1830.Contig1_All	165 1670 cytochrome P450 monooxygenase CYP6X1v1 [Lygus lineolaris]	1.586	Up	0.0423	58.03
Biological Process	GO:0044710	3	single-organism metabolic process	8.43817e-08	CL595.Contig1_All	22 3018 minus strand PREDICTED: dihydropyrimidine dehydrogenase [NADP+]-like isoform 1 [Apis mellifera]	1.395	Up	0.00185	109.55
Biological Process	GO:0044710	3	single-organism metabolic process	8.43817e-08	CL3702.Contig2_All	2 187 cytochrome P450 monooxygenase CYP6X1v1 [Lygus lineolaris]	2.390	Up	0.000452	7.1223
Biological Process	GO:0044710	3	single-organism metabolic process	8.43817e-08	Unigene623_All	2 1021 minus strand PREDICTED: uridine phosphorylase 1-like [Apis mellifera]	1.289	Up	0.00816	38.488
Biological Process	GO:0044710	3	single-organism metabolic process	8.43817e-08	CL1926.Contig1_All	280 2487 PREDICTED: delta-1-pyrroline-5-carboxylate synthase-like [Nasonia vitripennis]	1.272	Up	0.00939	79.601
Biological Process	GO:0044710	3	single-organism metabolic process	8.43817e-08	CL750.Contig1_All	387 1769 minus strand PREDICTED: similar to 4-aminobutyrate aminotransferase [Tribolium castaneum]	1.772	Up	0.000295	51.43
Biological Process	GO:0044710	3	single-organism metabolic process	8.43817e-08	Unigene12628_All	162 1289 PREDICTED: similar to phosphatidylcholine-sterol acyltransferase (lecithin-cholesterol acyltransferase) [Tribolium castaneum]	1.363	Up	0.0109	42.257
Biological Process	GO:0044710	3	single-organism metabolic process	8.43817e-08	Unigene3691_All	37 1200 minus strand dimethylaniline monooxygenase 5 [Culex quinquefasciatus] >gi|167875553|gb|EDS38936.1| dimethylaniline monooxygenase 5 [Culex quinquefasciatus]	1.223	Up	0.02	45.292
Biological Process	GO:0044710	3	single-organism metabolic process	8.43817e-08	CL3383.Contig3_All	152 1546 minus strand PREDICTED: peroxisomal N(1)-acetyl-spermine/spermidine oxidase-like [Bombus terrestris]	1.281	Up	0.00732	52.216
Biological Process	GO:0044710	3	single-organism metabolic process	8.43817e-08	Unigene6580_All	66 1193 minus strand PREDICTED: similar to plasma PAF acetylhydrolase [Tribolium castaneum]	1.306	Up	0.0316	42.97
Biological Process	GO:0044710	3	single-organism metabolic process	8.43817e-08	Unigene18209_All	76 1596 PREDICTED: probable cytochrome P450 6a14-like isoform 2 [Bombus terrestris]	1.215	Up	0.00779	58.57
Biological Process	GO:0044710	3	single-organism metabolic process	8.43817e-08	Unigene12673_All	106 1587 minus strand cytochrome P450 monooxygenase CYP6X1v1 [Lygus lineolaris]	1.568	Up	0.00488	57.101
Biological Process	GO:0044710	3	single-organism metabolic process	8.43817e-08	Unigene1445_All	78 878 minus strand PREDICTED: similar to pyrroline-5-carboxylate reductase [Tribolium castaneum]	1.625	Up	0.0121	28.223
Biological Process	GO:0044710	3	single-organism metabolic process	8.43817e-08	Unigene131_All	211 1482 Uncharacterized aarF domain-containing protein kinase 1 [Camponotus floridanus]	1.292	Up	0.0228	47.001
Biological Process	GO:0044710	3	single-organism metabolic process	8.43817e-08	CL3965.Contig2_All	136 1092 minus strand PREDICTED: alcohol dehydrogenase [NADP+] A-like [Apis mellifera]	1.264	Up	0.00425	36.218
Biological Process	GO:0044710	3	single-organism metabolic process	8.43817e-08	Unigene14482_All	89 445 minus strand Putative transthyretin-like protein ZK697.8 [Camponotus floridanus]	1.650	Up	0.00743	13.583
Biological Process	GO:0044710	3	single-organism metabolic process	8.43817e-08	Unigene5813_All	2 961 minus strand AMP deaminase 2 [Acromyrmex echinatior]	1.202	Up	0.0242	37.161
Biological Process	GO:0044710	3	single-organism metabolic process	8.43817e-08	Unigene8465_All	23 1945 minus strand PREDICTED: aldehyde oxidase-like [Bombus terrestris]	2.113	Up	0.00602	71.07
Biological Process	GO:0044710	3	single-organism metabolic process	8.43817e-08	Unigene10512_All	2 3025 minus strand Putative glutamate synthase [NADPH] [Harpegnathos saltator]	1.472	Up	0.000853	109.7
Biological Process	GO:0044710	3	single-organism metabolic process	8.43817e-08	Unigene20154_All	11 520 PREDICTED: similar to thiamin pyrophosphokinase 1 [Tribolium castaneum]	1.406	Up	0.000291	18.827
Biological Process	GO:0044710	3	single-organism metabolic process	8.43817e-08	Unigene7149_All	45 1463 minus strand PREDICTED: UDP-glucose 6-dehydrogenase-like [Bombus terrestris] >gi|350400065|ref|XP_003485726.1| PREDICTED: UDP-glucose 6-dehydrogenase-like [Bombus impatiens]	1.321	Up	0.0228	52.614
Biological Process	GO:0044710	3	single-organism metabolic process	8.43817e-08	Unigene5734_All	92 1699 cytochrome P450 [Leptinotarsa decemlineata]	1.573	Up	0.0412	62.532
Biological Process	GO:0044710	3	single-organism metabolic process	8.43817e-08	Unigene1483_All	133 1569 PREDICTED: cytochrome P450 6a2-like [Bombus impatiens]	1.402	Up	0.00371	55.123
Biological Process	GO:0044710	3	single-organism metabolic process	8.43817e-08	Unigene4258_All	335 1672 minus strand GJ17765 [Drosophila virilis] >gi|194149265|gb|EDW64963.1| GJ17765 [Drosophila virilis]	1.227	Up	0.00714	51.489
Biological Process	GO:0044710	3	single-organism metabolic process	8.43817e-08	Unigene16082_All	62 1063 minus strand PREDICTED: prostaglandin reductase 1-like [Nasonia vitripennis]	1.499	Up	0.0269	36.296
Biological Process	GO:0044710	3	single-organism metabolic process	8.43817e-08	Unigene11805_All	217 678 superoxide dismutase [Triatoma infestans]	1.311	Up	0.0318	15.832
Biological Process	GO:0044710	3	single-organism metabolic process	8.43817e-08	CL2199.Contig1_All	107 751 minus strand AGAP002898-PC [Anopheles gambiae str. PEST] >gi|347968788|ref|XP_003436291.1| AGAP002898-PD [Anopheles gambiae str. PEST] >gi|333467833|gb|EGK96714.1| AGAP002898-PC [Anopheles gambiae str. PEST] >gi|333467834|gb|EGK96715.1| AGAP002898-PD [Anopheles gambiae str. PEST]	1.398	Up	0.0322	24.81
Biological Process	GO:0044710	3	single-organism metabolic process	8.43817e-08	Unigene14646_All	35 4117 minus strand PREDICTED: xanthine dehydrogenase-like [Bombus terrestris]	1.201	Up	0.00947	150.96
Biological Process	GO:0044710	3	single-organism metabolic process	8.43817e-08	Unigene14700_All	93 1583 minus strand cytochrome P450 CYP6AX1 protein [Nilaparvata lugens]	1.404	Up	0.0488	57.202
Biological Process	GO:0044710	3	single-organism metabolic process	8.43817e-08	Unigene14067_All	66 1544 catalase [Schistocerca gregaria]	1.291	Up	0.0103	55.613
Biological Process	GO:0044710	3	single-organism metabolic process	8.43817e-08	Unigene2139_All	163 2151 minus strand PREDICTED: similar to acyl-CoA oxidase [Tribolium castaneum]	1.232	Up	0.000523	75.236
Biological Process	GO:0044710	3	single-organism metabolic process	8.43817e-08	Unigene22765_All	84 365 minus strand GMP reductase 1 [Harpegnathos saltator]	1.285	Up	0.00379	10.833
Biological Process	GO:0044710	3	single-organism metabolic process	8.43817e-08	Unigene29886_All	16 534 Dihydroxyacetone kinase [Harpegnathos saltator]	1.443	Up	0.0096	18.377
Biological Process	GO:0044710	3	single-organism metabolic process	8.43817e-08	CL1177.Contig2_All	60 578 minus strand PREDICTED: similar to Phosphatidylinositol-specific phospholipase C X domain-containing protein 2 (PI-PLC X domain-containing protein 2) [Ciona intestinalis]	1.956	Up	0.0102	19.72
Biological Process	GO:0044710	3	single-organism metabolic process	8.43817e-08	Unigene4604_All	30 1343 PREDICTED: fatty acid synthase-like [Acyrthosiphon pisum]	1.388	Up	0.0288	48.523
Biological Process	GO:0044710	3	single-organism metabolic process	8.43817e-08	CL3790.Contig3_All	47 1576 minus strand cytochrome P450 6BQ2 [Tribolium castaneum]	2.013	Up	0.00792	59.483
Biological Process	GO:0044710	3	single-organism metabolic process	8.43817e-08	Unigene33534_All	19 906 Putative glutamate synthase [NADPH] [Harpegnathos saltator]	1.359	Up	0.00258	32.998
Biological Process	GO:0044710	3	single-organism metabolic process	8.43817e-08	CL880.Contig3_All	1 816 PREDICTED: adenosylhomocysteinase-like isoform 2 [Bombus terrestris]	1.295	Up	0.00216	30.267
Biological Process	GO:0044710	3	single-organism metabolic process	8.43817e-08	CL3790.Contig1_All	2 1237 minus strand cytochrome P450 [Aedes aegypti] >gi|108874803|gb|EAT39028.1| cytochrome P450 [Aedes aegypti]	2.128	Up	8.57e-05	48.455
Biological Process	GO:0044710	3	single-organism metabolic process	8.43817e-08	Unigene1450_All	64 984 stearoyl-coa desaturase [Aedes aegypti] >gi|108880849|gb|EAT45074.1| stearoyl-coa desaturase [Aedes aegypti]	1.281	Up	0.0138	34.976
Biological Process	GO:0044710	3	single-organism metabolic process	8.43817e-08	Unigene18282_All	400 1320 PREDICTED: similar to CG6084 CG6084-PA [Tribolium castaneum]	1.380	Up	1.84e-05	34.703
Biological Process	GO:0044710	3	single-organism metabolic process	8.43817e-08	CL880.Contig1_All	190 1272 minus strand PREDICTED: adenosylhomocysteinase A-like [Anolis carolinensis]	1.216	Up	0.0144	39.899
Biological Process	GO:0050790	4	regulation of catalytic activity	0.229492	Unigene1580_All	90 1082 minus strand cathepsin B [Branchiostoma belcheri tsingtauense]	2.446	Up	0.00759	35.94
Biological Process	GO:0050790	4	regulation of catalytic activity	0.229492	Unigene18171_All	96 1094 minus strand cathepsin b [Aedes aegypti] >gi|54289254|gb|AAV31917.1| lysosomal cathepsin B [Aedes aegypti] >gi|108874249|gb|EAT38474.1| cathepsin b [Aedes aegypti]	1.693	Up	0.00769	36.55
Biological Process	GO:0050790	4	regulation of catalytic activity	0.229492	Unigene10119_All	56 325 minus strand Protein HBXIP-like protein [Harpegnathos saltator]	1.271	Up	0.00412	9.9132
Biological Process	GO:0055076	9	transition metal ion homeostasis	0.0422846	Unigene17997_All	92 793 minus strand ferritin subunit (glycosylated) [Nilaparvata lugens]	1.635	Up	0.00124	26.496
Biological Process	GO:0055076	9	transition metal ion homeostasis	0.0422846	Unigene9695_All	373 897 minus strand PREDICTED: ferritin subunit-like [Bombus impatiens]	1.563	Up	0.0154	20.212
Biological Process	GO:0055076	9	transition metal ion homeostasis	0.0422846	Unigene1596_All	185 700 ferritin [Triatoma infestans]	3.397	Up	0.000992	19.469
Biological Process	GO:1901615	4	organic hydroxy compound metabolic process	0.516642	Unigene29886_All	16 534 Dihydroxyacetone kinase [Harpegnathos saltator]	1.443	Up	0.0096	18.377
Biological Process	GO:1901615	4	organic hydroxy compound metabolic process	0.516642	Unigene20124_All	164 940 minus strand Inositol monophosphatase [Camponotus floridanus]	1.218	Up	0.0213	28.584
Biological Process	GO:0055072	10	iron ion homeostasis	0.0265819	Unigene17997_All	92 793 minus strand ferritin subunit (glycosylated) [Nilaparvata lugens]	1.635	Up	0.00124	26.496
Biological Process	GO:0055072	10	iron ion homeostasis	0.0265819	Unigene9695_All	373 897 minus strand PREDICTED: ferritin subunit-like [Bombus impatiens]	1.563	Up	0.0154	20.212
Biological Process	GO:0055072	10	iron ion homeostasis	0.0265819	Unigene1596_All	185 700 ferritin [Triatoma infestans]	3.397	Up	0.000992	19.469
Biological Process	GO:0048523	5	negative regulation of cellular process	0.480113	Unigene16237_All	130 990 F-actin-capping protein subunit alpha [Camponotus floridanus]	1.203	Up	0.0147	32.949
Biological Process	GO:0048523	5	negative regulation of cellular process	0.480113	Unigene10119_All	56 325 minus strand Protein HBXIP-like protein [Harpegnathos saltator]	1.271	Up	0.00412	9.9132
Biological Process	GO:0072523	6	purine-containing compound catabolic process	0.398627	CL880.Contig3_All	1 816 PREDICTED: adenosylhomocysteinase-like isoform 2 [Bombus terrestris]	1.295	Up	0.00216	30.267
Biological Process	GO:0072523	6	purine-containing compound catabolic process	0.398627	CL880.Contig1_All	190 1272 minus strand PREDICTED: adenosylhomocysteinase A-like [Anolis carolinensis]	1.216	Up	0.0144	39.899
Biological Process	GO:0006323	7	DNA packaging	0.195666	Unigene11729_All	79 675 truncated histone H1 [Triatoma infestans]	1.462	Up	0.0257	19.993
Biological Process	GO:0006323	7	DNA packaging	0.195666	Unigene201_All	251 655 PREDICTED: histone H4 [Equus caballus]	1.376	Up	0.0247	15.259
Biological Process	GO:0019856	9	pyrimidine nucleobase biosynthetic process	0.353246	Unigene16241_All	156 752 minus strand PREDICTED: UMP-CMP kinase-like isoform 2 [Acyrthosiphon pisum]	1.204	Up	0.0103	22.549
Biological Process	GO:0019856	9	pyrimidine nucleobase biosynthetic process	0.353246	CL595.Contig1_All	22 3018 minus strand PREDICTED: dihydropyrimidine dehydrogenase [NADP+]-like isoform 1 [Apis mellifera]	1.395	Up	0.00185	109.55
Biological Process	GO:0008652	9	cellular amino acid biosynthetic process	0.0171295	Unigene15870_All	"163 693 minus strand 1,2-dihydroxy-3-keto-5-methylthiopentene dioxygenase [Camponotus floridanus]"	1.612	Up	0.0179	21.215
Biological Process	GO:0008652	9	cellular amino acid biosynthetic process	0.0171295	Unigene10512_All	2 3025 minus strand Putative glutamate synthase [NADPH] [Harpegnathos saltator]	1.472	Up	0.000853	109.7
Biological Process	GO:0008652	9	cellular amino acid biosynthetic process	0.0171295	Unigene1610_All	96 899 PREDICTED: similar to GA19292-PA [Tribolium castaneum]	1.232	Up	0.0367	28.416
Biological Process	GO:0008652	9	cellular amino acid biosynthetic process	0.0171295	CL1926.Contig1_All	280 2487 PREDICTED: delta-1-pyrroline-5-carboxylate synthase-like [Nasonia vitripennis]	1.272	Up	0.00939	79.601
Biological Process	GO:0008652	9	cellular amino acid biosynthetic process	0.0171295	Unigene1445_All	78 878 minus strand PREDICTED: similar to pyrroline-5-carboxylate reductase [Tribolium castaneum]	1.625	Up	0.0121	28.223
Biological Process	GO:0016042	5	lipid catabolic process	0.252028	Unigene2139_All	163 2151 minus strand PREDICTED: similar to acyl-CoA oxidase [Tribolium castaneum]	1.232	Up	0.000523	75.236
Biological Process	GO:0016042	5	lipid catabolic process	0.252028	Unigene6580_All	66 1193 minus strand PREDICTED: similar to plasma PAF acetylhydrolase [Tribolium castaneum]	1.306	Up	0.0316	42.97
Biological Process	GO:1901658	6	glycosyl compound catabolic process	0.398627	CL880.Contig3_All	1 816 PREDICTED: adenosylhomocysteinase-like isoform 2 [Bombus terrestris]	1.295	Up	0.00216	30.267
Biological Process	GO:1901658	6	glycosyl compound catabolic process	0.398627	CL880.Contig1_All	190 1272 minus strand PREDICTED: adenosylhomocysteinase A-like [Anolis carolinensis]	1.216	Up	0.0144	39.899
Biological Process	GO:1901136	5	carbohydrate derivative catabolic process	0.531445	CL880.Contig3_All	1 816 PREDICTED: adenosylhomocysteinase-like isoform 2 [Bombus terrestris]	1.295	Up	0.00216	30.267
Biological Process	GO:1901136	5	carbohydrate derivative catabolic process	0.531445	Unigene9717_All	118 717 PREDICTED: acidic endochitinase SP2-like [Nasonia vitripennis]	1.227	Up	0.0333	22.808
Biological Process	GO:1901136	5	carbohydrate derivative catabolic process	0.531445	CL880.Contig1_All	190 1272 minus strand PREDICTED: adenosylhomocysteinase A-like [Anolis carolinensis]	1.216	Up	0.0144	39.899
Biological Process	GO:1901605	9	alpha-amino acid metabolic process	0.0106487	Unigene10512_All	2 3025 minus strand Putative glutamate synthase [NADPH] [Harpegnathos saltator]	1.472	Up	0.000853	109.7
Biological Process	GO:1901605	9	alpha-amino acid metabolic process	0.0106487	Unigene20072_All	307 864 minus strand uncharacterized protein LOC100302387 precursor [Acyrthosiphon pisum] >gi|239792635|dbj|BAH72639.1| ACYPI46563 [Acyrthosiphon pisum]	1.538	Up	0.0309	20.675
Biological Process	GO:1901605	9	alpha-amino acid metabolic process	0.0106487	Unigene1610_All	96 899 PREDICTED: similar to GA19292-PA [Tribolium castaneum]	1.232	Up	0.0367	28.416
Biological Process	GO:1901605	9	alpha-amino acid metabolic process	0.0106487	CL1926.Contig1_All	280 2487 PREDICTED: delta-1-pyrroline-5-carboxylate synthase-like [Nasonia vitripennis]	1.272	Up	0.00939	79.601
Biological Process	GO:1901605	9	alpha-amino acid metabolic process	0.0106487	CL880.Contig3_All	1 816 PREDICTED: adenosylhomocysteinase-like isoform 2 [Bombus terrestris]	1.295	Up	0.00216	30.267
Biological Process	GO:1901605	9	alpha-amino acid metabolic process	0.0106487	Unigene15870_All	"163 693 minus strand 1,2-dihydroxy-3-keto-5-methylthiopentene dioxygenase [Camponotus floridanus]"	1.612	Up	0.0179	21.215
Biological Process	GO:1901605	9	alpha-amino acid metabolic process	0.0106487	CL880.Contig1_All	190 1272 minus strand PREDICTED: adenosylhomocysteinase A-like [Anolis carolinensis]	1.216	Up	0.0144	39.899
Biological Process	GO:1901605	9	alpha-amino acid metabolic process	0.0106487	Unigene1445_All	78 878 minus strand PREDICTED: similar to pyrroline-5-carboxylate reductase [Tribolium castaneum]	1.625	Up	0.0121	28.223
Biological Process	GO:0051276	5	chromosome organization	0.582223	Unigene11729_All	79 675 truncated histone H1 [Triatoma infestans]	1.462	Up	0.0257	19.993
Biological Process	GO:0051276	5	chromosome organization	0.582223	Unigene201_All	251 655 PREDICTED: histone H4 [Equus caballus]	1.376	Up	0.0247	15.259
Biological Process	GO:0006873	7	cellular ion homeostasis	0.080959	Unigene17997_All	92 793 minus strand ferritin subunit (glycosylated) [Nilaparvata lugens]	1.635	Up	0.00124	26.496
Biological Process	GO:0006873	7	cellular ion homeostasis	0.080959	Unigene9695_All	373 897 minus strand PREDICTED: ferritin subunit-like [Bombus impatiens]	1.563	Up	0.0154	20.212
Biological Process	GO:0006873	7	cellular ion homeostasis	0.080959	Unigene1596_All	185 700 ferritin [Triatoma infestans]	3.397	Up	0.000992	19.469
Biological Process	GO:0016054	6	organic acid catabolic process	0.0391019	Unigene2139_All	163 2151 minus strand PREDICTED: similar to acyl-CoA oxidase [Tribolium castaneum]	1.232	Up	0.000523	75.236
Biological Process	GO:0016054	6	organic acid catabolic process	0.0391019	Unigene20072_All	307 864 minus strand uncharacterized protein LOC100302387 precursor [Acyrthosiphon pisum] >gi|239792635|dbj|BAH72639.1| ACYPI46563 [Acyrthosiphon pisum]	1.538	Up	0.0309	20.675
Biological Process	GO:0016054	6	organic acid catabolic process	0.0391019	CL3797.Contig2_All	99 1388 PREDICTED: mitochondrial enolase superfamily member 1-like [Apis mellifera]	1.250	Up	0.0324	48.605
Biological Process	GO:0016054	6	organic acid catabolic process	0.0391019	CL880.Contig3_All	1 816 PREDICTED: adenosylhomocysteinase-like isoform 2 [Bombus terrestris]	1.295	Up	0.00216	30.267
Biological Process	GO:0016054	6	organic acid catabolic process	0.0391019	CL880.Contig1_All	190 1272 minus strand PREDICTED: adenosylhomocysteinase A-like [Anolis carolinensis]	1.216	Up	0.0144	39.899
Biological Process	GO:1901606	10	alpha-amino acid catabolic process	0.282996	Unigene20072_All	307 864 minus strand uncharacterized protein LOC100302387 precursor [Acyrthosiphon pisum] >gi|239792635|dbj|BAH72639.1| ACYPI46563 [Acyrthosiphon pisum]	1.538	Up	0.0309	20.675
Biological Process	GO:1901606	10	alpha-amino acid catabolic process	0.282996	CL880.Contig3_All	1 816 PREDICTED: adenosylhomocysteinase-like isoform 2 [Bombus terrestris]	1.295	Up	0.00216	30.267
Biological Process	GO:1901606	10	alpha-amino acid catabolic process	0.282996	CL880.Contig1_All	190 1272 minus strand PREDICTED: adenosylhomocysteinase A-like [Anolis carolinensis]	1.216	Up	0.0144	39.899
Biological Process	GO:1901361	5	organic cyclic compound catabolic process	0.25278	Unigene623_All	2 1021 minus strand PREDICTED: uridine phosphorylase 1-like [Apis mellifera]	1.289	Up	0.00816	38.488
Biological Process	GO:1901361	5	organic cyclic compound catabolic process	0.25278	Unigene20072_All	307 864 minus strand uncharacterized protein LOC100302387 precursor [Acyrthosiphon pisum] >gi|239792635|dbj|BAH72639.1| ACYPI46563 [Acyrthosiphon pisum]	1.538	Up	0.0309	20.675
Biological Process	GO:1901361	5	organic cyclic compound catabolic process	0.25278	CL880.Contig3_All	1 816 PREDICTED: adenosylhomocysteinase-like isoform 2 [Bombus terrestris]	1.295	Up	0.00216	30.267
Biological Process	GO:1901361	5	organic cyclic compound catabolic process	0.25278	CL880.Contig1_All	190 1272 minus strand PREDICTED: adenosylhomocysteinase A-like [Anolis carolinensis]	1.216	Up	0.0144	39.899
Biological Process	GO:0031497	8	chromatin assembly	0.195666	Unigene11729_All	79 675 truncated histone H1 [Triatoma infestans]	1.462	Up	0.0257	19.993
Biological Process	GO:0031497	8	chromatin assembly	0.195666	Unigene201_All	251 655 PREDICTED: histone H4 [Equus caballus]	1.376	Up	0.0247	15.259
Biological Process	GO:0071103	6	DNA conformation change	0.398627	Unigene11729_All	79 675 truncated histone H1 [Triatoma infestans]	1.462	Up	0.0257	19.993
Biological Process	GO:0071103	6	DNA conformation change	0.398627	Unigene201_All	251 655 PREDICTED: histone H4 [Equus caballus]	1.376	Up	0.0247	15.259
Biological Process	GO:0006333	6	chromatin assembly or disassembly	0.252028	Unigene11729_All	79 675 truncated histone H1 [Triatoma infestans]	1.462	Up	0.0257	19.993
Biological Process	GO:0006333	6	chromatin assembly or disassembly	0.252028	Unigene201_All	251 655 PREDICTED: histone H4 [Equus caballus]	1.376	Up	0.0247	15.259
Biological Process	GO:0050801	6	ion homeostasis	0.080959	Unigene17997_All	92 793 minus strand ferritin subunit (glycosylated) [Nilaparvata lugens]	1.635	Up	0.00124	26.496
Biological Process	GO:0050801	6	ion homeostasis	0.080959	Unigene9695_All	373 897 minus strand PREDICTED: ferritin subunit-like [Bombus impatiens]	1.563	Up	0.0154	20.212
Biological Process	GO:0050801	6	ion homeostasis	0.080959	Unigene1596_All	185 700 ferritin [Triatoma infestans]	3.397	Up	0.000992	19.469
Biological Process	GO:0044273	5	sulfur compound catabolic process	0.353246	CL880.Contig3_All	1 816 PREDICTED: adenosylhomocysteinase-like isoform 2 [Bombus terrestris]	1.295	Up	0.00216	30.267
Biological Process	GO:0044273	5	sulfur compound catabolic process	0.353246	CL880.Contig1_All	190 1272 minus strand PREDICTED: adenosylhomocysteinase A-like [Anolis carolinensis]	1.216	Up	0.0144	39.899
Biological Process	GO:0006879	11	cellular iron ion homeostasis	0.0265819	Unigene17997_All	92 793 minus strand ferritin subunit (glycosylated) [Nilaparvata lugens]	1.635	Up	0.00124	26.496
Biological Process	GO:0006879	11	cellular iron ion homeostasis	0.0265819	Unigene9695_All	373 897 minus strand PREDICTED: ferritin subunit-like [Bombus impatiens]	1.563	Up	0.0154	20.212
Biological Process	GO:0006879	11	cellular iron ion homeostasis	0.0265819	Unigene1596_All	185 700 ferritin [Triatoma infestans]	3.397	Up	0.000992	19.469
Biological Process	GO:0030003	8	cellular cation homeostasis	0.080959	Unigene17997_All	92 793 minus strand ferritin subunit (glycosylated) [Nilaparvata lugens]	1.635	Up	0.00124	26.496
Biological Process	GO:0030003	8	cellular cation homeostasis	0.080959	Unigene9695_All	373 897 minus strand PREDICTED: ferritin subunit-like [Bombus impatiens]	1.563	Up	0.0154	20.212
Biological Process	GO:0030003	8	cellular cation homeostasis	0.080959	Unigene1596_All	185 700 ferritin [Triatoma infestans]	3.397	Up	0.000992	19.469
Biological Process	GO:0055082	6	cellular chemical homeostasis	0.176866	Unigene17997_All	92 793 minus strand ferritin subunit (glycosylated) [Nilaparvata lugens]	1.635	Up	0.00124	26.496
Biological Process	GO:0055082	6	cellular chemical homeostasis	0.176866	Unigene9695_All	373 897 minus strand PREDICTED: ferritin subunit-like [Bombus impatiens]	1.563	Up	0.0154	20.212
Biological Process	GO:0055082	6	cellular chemical homeostasis	0.176866	Unigene1596_All	185 700 ferritin [Triatoma infestans]	3.397	Up	0.000992	19.469
Biological Process	GO:0042454	9	ribonucleoside catabolic process	0.398627	CL880.Contig3_All	1 816 PREDICTED: adenosylhomocysteinase-like isoform 2 [Bombus terrestris]	1.295	Up	0.00216	30.267
Biological Process	GO:0042454	9	ribonucleoside catabolic process	0.398627	CL880.Contig1_All	190 1272 minus strand PREDICTED: adenosylhomocysteinase A-like [Anolis carolinensis]	1.216	Up	0.0144	39.899
Biological Process	GO:0006730	5	one-carbon metabolic process	0.398627	CL880.Contig3_All	1 816 PREDICTED: adenosylhomocysteinase-like isoform 2 [Bombus terrestris]	1.295	Up	0.00216	30.267
Biological Process	GO:0006730	5	one-carbon metabolic process	0.398627	CL880.Contig1_All	190 1272 minus strand PREDICTED: adenosylhomocysteinase A-like [Anolis carolinensis]	1.216	Up	0.0144	39.899
Biological Process	GO:0006508	6	proteolysis	0.000536139	CL1077.Contig1_All	"1089 2804 minus strand Transmembrane protease, serine 9 [Harpegnathos saltator]"	1.244	Up	0.015	61.858
Biological Process	GO:0006508	6	proteolysis	0.000536139	Unigene1485_All	67 1440 PREDICTED: lysosomal Pro-X carboxypeptidase-like [Acyrthosiphon pisum]	1.547	Up	0.00112	51.627
Biological Process	GO:0006508	6	proteolysis	0.000536139	Unigene16075_All	173 1174 minus strand cathepsin L-like cysteine protease 2 [Plautia stali]	1.483	Up	0.00615	37.586
Biological Process	GO:0006508	6	proteolysis	0.000536139	Unigene18412_All	2 424 Serine proteinase stubble [Camponotus floridanus]	1.378	Up	0.0284	15.632
Biological Process	GO:0006508	6	proteolysis	0.000536139	Unigene3411_All	2 721 minus strand trypsin precursor LlSgP4 [Lygus lineolaris]	1.404	Up	0.000218	26.811
Biological Process	GO:0006508	6	proteolysis	0.000536139	CL3794.Contig2_All	76 906 trypsin precursor LlGtP1 [Lygus lineolaris]	1.540	Up	0.0022	30.773
Biological Process	GO:0006508	6	proteolysis	0.000536139	Unigene14979_All	300 1508 venom serine carboxypeptidase [Danaus plexippus]	1.444	Up	0.0316	45.807
Biological Process	GO:0006508	6	proteolysis	0.000536139	CL1335.Contig2_All	123 1127 GH22826 [Drosophila grimshawi] >gi|193899288|gb|EDV98154.1| GH22826 [Drosophila grimshawi]	1.747	Up	0.0449	37.454
Biological Process	GO:0006508	6	proteolysis	0.000536139	Unigene18213_All	29 1417 minus strand PREDICTED: venom serine carboxypeptidase-like [Bombus terrestris]	1.595	Up	0.0204	52.784
Biological Process	GO:0006508	6	proteolysis	0.000536139	Unigene10829_All	"51 1607 26,29 kDa proteinase-like cysteine protease [Plautia stali]"	1.553	Up	0.00411	58.6
Biological Process	GO:0006508	6	proteolysis	0.000536139	Unigene1577_All	53 862 minus strand trypsin precursor LlSgP3 [Lygus lineolaris]	1.553	Up	0.00322	29.989
Biological Process	GO:0006508	6	proteolysis	0.000536139	Unigene3337_All	19 894 gluten hydrolyzing proteinase [Eurygaster integriceps]	2.590	Up	0.015	31.512
Biological Process	GO:0006508	6	proteolysis	0.000536139	Unigene14038_All	126 1337 tick legumain [Haemaphysalis longicornis]	2.843	Up	0.00418	45.682
Biological Process	GO:0006508	6	proteolysis	0.000536139	Unigene20396_All	2 721 trypsin precursor LlSgP4 [Lygus lineolaris]	1.445	Up	0.0342	26.721
Biological Process	GO:0006508	6	proteolysis	0.000536139	Unigene12443_All	1 396 minus strand PREDICTED: cathepsin L-like [Oreochromis niloticus]	2.735	Up	0.00231	14.238
Biological Process	GO:0006508	6	proteolysis	0.000536139	Unigene11900_All	2 547 serine protease [Laccotrephes japonensis]	1.229	Up	0.0172	19.828
Biological Process	GO:0006508	6	proteolysis	0.000536139	CL184.Contig3_All	103 984 minus strand secreted salivary trypsin [Triatoma matogrossensis]	2.170	Up	0.00485	32.214
Biological Process	GO:0006508	6	proteolysis	0.000536139	Unigene284_All	1 1197 PREDICTED: similar to oligopeptidase [Tribolium castaneum]	1.237	Up	0.002	46.065
Biological Process	GO:0006508	6	proteolysis	0.000536139	Unigene13889_All	1 714 minus strand trypsin-like protease [Ranatra unicolor]	1.340	Up	0.00921	26.457
Biological Process	GO:0006508	6	proteolysis	0.000536139	CL515.Contig1_All	5 706 minus strand trypsin precursor LlSgP3 [Lygus lineolaris]	1.389	Up	0.0189	25.644
Biological Process	GO:0006508	6	proteolysis	0.000536139	CL5255.Contig2_All	70 1101 cathepsin L-like cysteine protease 1 [Plautia stali]	1.767	Up	0.00761	38.57
Biological Process	GO:0006508	6	proteolysis	0.000536139	Unigene18257_All	90 848 minus strand trypsin-like protease [Ranatra unicolor]	1.579	Up	0.00106	28.034
Biological Process	GO:0006508	6	proteolysis	0.000536139	Unigene18171_All	96 1094 minus strand cathepsin b [Aedes aegypti] >gi|54289254|gb|AAV31917.1| lysosomal cathepsin B [Aedes aegypti] >gi|108874249|gb|EAT38474.1| cathepsin b [Aedes aegypti]	1.693	Up	0.00769	36.55
Biological Process	GO:0006508	6	proteolysis	0.000536139	Unigene9896_All	240 1625 PREDICTED: similar to thymus-specific serine protease [Tribolium castaneum]	1.612	Up	0.0025	52.646
Biological Process	GO:0006508	6	proteolysis	0.000536139	Unigene5660_All	58 1467 minus strand PREDICTED: similar to trypsin-like serine protease [Tribolium castaneum]	1.546	Up	0.0195	51.273
Biological Process	GO:0006508	6	proteolysis	0.000536139	Unigene4120_All	4 351 salivary trypsin [Triatoma infestans]	1.314	Up	0.0456	12.709
Biological Process	GO:0006508	6	proteolysis	0.000536139	CL272.Contig6_All	32 1012 minus strand cathepsin L-like proteinase [Triatoma brasiliensis]	1.338	Up	0.0249	35.999
Biological Process	GO:0006508	6	proteolysis	0.000536139	CL4079.Contig2_All	1 1044 PREDICTED: cathepsin O-like [Apis mellifera]	1.214	Up	0.0104	39.632
Biological Process	GO:0006508	6	proteolysis	0.000536139	Unigene1580_All	90 1082 minus strand cathepsin B [Branchiostoma belcheri tsingtauense]	2.446	Up	0.00759	35.94
Biological Process	GO:0006508	6	proteolysis	0.000536139	Unigene14000_All	69 1217 minus strand molting fluid carboxypeptidase A precursor [Bombyx mori] >gi|54114893|dbj|BAD60916.1| molting fluid carboxypeptidase A [Bombyx mori]	1.559	Up	0.00146	43.859
Biological Process	GO:0006508	6	proteolysis	0.000536139	Unigene3680_All	140 478 minus strand GK15707 [Drosophila willistoni] >gi|194159897|gb|EDW74798.1| GK15707 [Drosophila willistoni]	1.290	Up	0.0275	12.715
Biological Process	GO:0006508	6	proteolysis	0.000536139	Unigene2476_All	9 2690 minus strand Neurotrypsin [Camponotus floridanus]	1.318	Up	0.000327	98.5
Biological Process	GO:0006508	6	proteolysis	0.000536139	Unigene8582_All	20 1189 PREDICTED: serine protease snake-like [Bombus impatiens]	1.856	Up	0.0406	42.675
Biological Process	GO:0006207	10	'de novo' pyrimidine nucleobase biosynthetic process	0.353246	Unigene16241_All	156 752 minus strand PREDICTED: UMP-CMP kinase-like isoform 2 [Acyrthosiphon pisum]	1.204	Up	0.0103	22.549
Biological Process	GO:0006207	10	'de novo' pyrimidine nucleobase biosynthetic process	0.353246	CL595.Contig1_All	22 3018 minus strand PREDICTED: dihydropyrimidine dehydrogenase [NADP+]-like isoform 1 [Apis mellifera]	1.395	Up	0.00185	109.55
Biological Process	GO:0044712	4	single-organism catabolic process	0.0272311	Unigene623_All	2 1021 minus strand PREDICTED: uridine phosphorylase 1-like [Apis mellifera]	1.289	Up	0.00816	38.488
Biological Process	GO:0044712	4	single-organism catabolic process	0.0272311	Unigene20072_All	307 864 minus strand uncharacterized protein LOC100302387 precursor [Acyrthosiphon pisum] >gi|239792635|dbj|BAH72639.1| ACYPI46563 [Acyrthosiphon pisum]	1.538	Up	0.0309	20.675
Biological Process	GO:0044712	4	single-organism catabolic process	0.0272311	CL3797.Contig2_All	99 1388 PREDICTED: mitochondrial enolase superfamily member 1-like [Apis mellifera]	1.250	Up	0.0324	48.605
Biological Process	GO:0044712	4	single-organism catabolic process	0.0272311	CL880.Contig3_All	1 816 PREDICTED: adenosylhomocysteinase-like isoform 2 [Bombus terrestris]	1.295	Up	0.00216	30.267
Biological Process	GO:0044712	4	single-organism catabolic process	0.0272311	Unigene6580_All	66 1193 minus strand PREDICTED: similar to plasma PAF acetylhydrolase [Tribolium castaneum]	1.306	Up	0.0316	42.97
Biological Process	GO:0044712	4	single-organism catabolic process	0.0272311	Unigene2139_All	163 2151 minus strand PREDICTED: similar to acyl-CoA oxidase [Tribolium castaneum]	1.232	Up	0.000523	75.236
Biological Process	GO:0044712	4	single-organism catabolic process	0.0272311	CL880.Contig1_All	190 1272 minus strand PREDICTED: adenosylhomocysteinase A-like [Anolis carolinensis]	1.216	Up	0.0144	39.899
Biological Process	GO:0044712	4	single-organism catabolic process	0.0272311	Unigene20124_All	164 940 minus strand Inositol monophosphatase [Camponotus floridanus]	1.218	Up	0.0213	28.584
Biological Process	GO:0044282	5	small molecule catabolic process	0.0266304	Unigene2139_All	163 2151 minus strand PREDICTED: similar to acyl-CoA oxidase [Tribolium castaneum]	1.232	Up	0.000523	75.236
Biological Process	GO:0044282	5	small molecule catabolic process	0.0266304	Unigene20072_All	307 864 minus strand uncharacterized protein LOC100302387 precursor [Acyrthosiphon pisum] >gi|239792635|dbj|BAH72639.1| ACYPI46563 [Acyrthosiphon pisum]	1.538	Up	0.0309	20.675
Biological Process	GO:0044282	5	small molecule catabolic process	0.0266304	CL3797.Contig2_All	99 1388 PREDICTED: mitochondrial enolase superfamily member 1-like [Apis mellifera]	1.250	Up	0.0324	48.605
Biological Process	GO:0044282	5	small molecule catabolic process	0.0266304	CL880.Contig3_All	1 816 PREDICTED: adenosylhomocysteinase-like isoform 2 [Bombus terrestris]	1.295	Up	0.00216	30.267
Biological Process	GO:0044282	5	small molecule catabolic process	0.0266304	CL880.Contig1_All	190 1272 minus strand PREDICTED: adenosylhomocysteinase A-like [Anolis carolinensis]	1.216	Up	0.0144	39.899
Biological Process	GO:0044282	5	small molecule catabolic process	0.0266304	Unigene20124_All	164 940 minus strand Inositol monophosphatase [Camponotus floridanus]	1.218	Up	0.0213	28.584
Biological Process	GO:0006875	9	cellular metal ion homeostasis	0.080959	Unigene17997_All	92 793 minus strand ferritin subunit (glycosylated) [Nilaparvata lugens]	1.635	Up	0.00124	26.496
Biological Process	GO:0006875	9	cellular metal ion homeostasis	0.080959	Unigene9695_All	373 897 minus strand PREDICTED: ferritin subunit-like [Bombus impatiens]	1.563	Up	0.0154	20.212
Biological Process	GO:0006875	9	cellular metal ion homeostasis	0.080959	Unigene1596_All	185 700 ferritin [Triatoma infestans]	3.397	Up	0.000992	19.469
Biological Process	GO:0006012	8	galactose metabolic process	0.304464	Unigene11963_All	220 1251 minus strand PREDICTED: probable galactose-1-phosphate uridylyltransferase-like [Acyrthosiphon pisum]	1.406	Up	0.0177	40.388
Biological Process	GO:0006012	8	galactose metabolic process	0.304464	CL4198.Contig1_All	67 924 minus strand PREDICTED: similar to galactokinase 1 [Strongylocentrotus purpuratus] >gi|115965341|ref|XP_001187174.1| PREDICTED: similar to galactokinase 1 [Strongylocentrotus purpuratus]	1.248	Up	0.0259	31.249
Biological Process	GO:0046700	5	heterocycle catabolic process	0.214576	Unigene623_All	2 1021 minus strand PREDICTED: uridine phosphorylase 1-like [Apis mellifera]	1.289	Up	0.00816	38.488
Biological Process	GO:0046700	5	heterocycle catabolic process	0.214576	Unigene20072_All	307 864 minus strand uncharacterized protein LOC100302387 precursor [Acyrthosiphon pisum] >gi|239792635|dbj|BAH72639.1| ACYPI46563 [Acyrthosiphon pisum]	1.538	Up	0.0309	20.675
Biological Process	GO:0046700	5	heterocycle catabolic process	0.214576	CL880.Contig3_All	1 816 PREDICTED: adenosylhomocysteinase-like isoform 2 [Bombus terrestris]	1.295	Up	0.00216	30.267
Biological Process	GO:0046700	5	heterocycle catabolic process	0.214576	CL880.Contig1_All	190 1272 minus strand PREDICTED: adenosylhomocysteinase A-like [Anolis carolinensis]	1.216	Up	0.0144	39.899
