# Supplementary material for: Differential Proteomics Analysis Unraveled Mechanisms of Arma chinensis Responding to Improved Artificial Diet
Source: Insects. 2022 Jul 2;13(7):605. doi: 10.3390/insects13070605 (PMC9319121; doi:10.3390/insects13070605)
Supplement: Supplementary file 1 [file insects-13-00605-s001.zip › Supplementary Table S9.xlsx]

## Sheet: Down GO2Protein
Table S9. GO enrichment for the down-regulated DEPs in IADN/COSMN.
GO Terms Level 1	GO Terms ID	GO Terms Level	GO Terms Description	Fisher's exact test P value	Protein accession	Protein description	IADN/COSMN Ratio	Regulated Type	IADN/COSMN P value	MW [kDa]
Cellular Component	GO:0043228	3	non-membrane-bounded organelle	0.0703045	Unigene6180_All	66 413 minus strand 60S ribosomal protein L34 [Acromyrmex echinatior]	0.630	Down	0.0198	13.788
Cellular Component	GO:0043228	3	non-membrane-bounded organelle	0.0703045	Unigene20694_All	74 442 ribosomal protein L35 [Chrysomela tremula]	0.506	Down	0.0415	14.381
Cellular Component	GO:0043228	3	non-membrane-bounded organelle	0.0703045	Unigene37139_All	1 330 ribosomal protein L17 [Heliconius melpomene cythera]	0.355	Down	0.0289	12.657
Cellular Component	GO:0043228	3	non-membrane-bounded organelle	0.0703045	CL2767.Contig2_All	108 479 minus strand ribosomal protein S12 [Manduca sexta]	0.786	Down	0.007	13.62
Cellular Component	GO:0043228	3	non-membrane-bounded organelle	0.0703045	Unigene11792_All	70 702 minus strand 60S ribosomal protein L15 [Harpegnathos saltator]	0.714	Down	0.0319	24.846
Cellular Component	GO:0043228	3	non-membrane-bounded organelle	0.0703045	Unigene13832_All	36 632 minus strand PREDICTED: similar to ribosomal protein L19e [Tribolium castaneum]	0.707	Down	0.00691	23.655
Cellular Component	GO:0043228	3	non-membrane-bounded organelle	0.0703045	Unigene13867_All	66 674 minus strand PREDICTED: 60S ribosomal protein L13a-like [Bombus impatiens]	0.767	Down	0.0117	23.136
Cellular Component	GO:0043228	3	non-membrane-bounded organelle	0.0703045	Unigene42637_All	1 393 S3a protein [Antheraea pernyi]	0.186	Down	0.00546	15.208
Cellular Component	GO:0043228	3	non-membrane-bounded organelle	0.0703045	Unigene7603_All	48 788 minus strand 40S ribosomal protein S6 [Acromyrmex echinatior]	0.820	Down	0.0199	28.505
Cellular Component	GO:0043228	3	non-membrane-bounded organelle	0.0703045	Unigene36112_All	2 256 minus strand ribosomal protein L13A [Antheraea yamamai]	0.160	Down	0.0165	9.8055
Cellular Component	GO:0043228	3	non-membrane-bounded organelle	0.0703045	CL1551.Contig2_All	79 903 minus strand PREDICTED: similar to ribosomal protein S2 [Tribolium castaneum]	0.823	Down	0.0049	29.45
Cellular Component	GO:0043228	3	non-membrane-bounded organelle	0.0703045	Unigene17279_All	85 258 minus strand 40S ribosomal protein S14 [Rhodnius prolixus]	0.710	Down	0.0144	6.314
Cellular Component	GO:0043228	3	non-membrane-bounded organelle	0.0703045	Unigene439_All	161 3667 PREDICTED: structural maintenance of chromosomes protein 2-like [Bombus impatiens]	0.254	Down	0.0288	133.98
Cellular Component	GO:0005787	11	signal peptidase complex	0.147512	Unigene20699_All	77 364 minus strand signal peptidase complex subunit 1-like protein [Triatoma matogrossensis]	0.733	Down	0.00649	11.27
Cellular Component	GO:0005787	11	signal peptidase complex	0.147512	Unigene20011_All	91 669 minus strand signal peptidase complex subunit SPC25 [Dipetalogaster maximus]	0.820	Down	0.0407	22.029
Cellular Component	GO:1905368	4	peptidase complex	0.69324	Unigene20699_All	77 364 minus strand signal peptidase complex subunit 1-like protein [Triatoma matogrossensis]	0.733	Down	0.00649	11.27
Cellular Component	GO:1905368	4	peptidase complex	0.69324	Unigene20011_All	91 669 minus strand signal peptidase complex subunit SPC25 [Dipetalogaster maximus]	0.820	Down	0.0407	22.029
Cellular Component	GO:0005789	10	endoplasmic reticulum membrane	0.0114049	Unigene20699_All	77 364 minus strand signal peptidase complex subunit 1-like protein [Triatoma matogrossensis]	0.733	Down	0.00649	11.27
Cellular Component	GO:0005789	10	endoplasmic reticulum membrane	0.0114049	Unigene20011_All	91 669 minus strand signal peptidase complex subunit SPC25 [Dipetalogaster maximus]	0.820	Down	0.0407	22.029
Cellular Component	GO:0005789	10	endoplasmic reticulum membrane	0.0114049	Unigene8238_All	124 408 Sec61 protein translocation complex beta subunit [Triatoma infestans] >gi|344190604|gb|AEM97988.1| Sec61 protein translocation complex beta subunit [Dipetalogaster maximus]	0.645	Down	0.00377	10.073
Cellular Component	GO:0005789	10	endoplasmic reticulum membrane	0.0114049	Unigene18189_All	95 1948 PREDICTED: signal recognition particle receptor subunit alpha homolog isoform 2 [Nasonia vitripennis]	0.757	Down	0.0112	68.989
Cellular Component	GO:0005789	10	endoplasmic reticulum membrane	0.0114049	Unigene25727_All	148 318 jagunal-like protein [Rhodnius prolixus]	0.625	Down	0.0195	6.4174
Cellular Component	GO:0005840	8	ribosome	0.0456921	Unigene6180_All	66 413 minus strand 60S ribosomal protein L34 [Acromyrmex echinatior]	0.630	Down	0.0198	13.788
Cellular Component	GO:0005840	8	ribosome	0.0456921	Unigene20694_All	74 442 ribosomal protein L35 [Chrysomela tremula]	0.506	Down	0.0415	14.381
Cellular Component	GO:0005840	8	ribosome	0.0456921	Unigene37139_All	1 330 ribosomal protein L17 [Heliconius melpomene cythera]	0.355	Down	0.0289	12.657
Cellular Component	GO:0005840	8	ribosome	0.0456921	CL2767.Contig2_All	108 479 minus strand ribosomal protein S12 [Manduca sexta]	0.786	Down	0.007	13.62
Cellular Component	GO:0005840	8	ribosome	0.0456921	Unigene11792_All	70 702 minus strand 60S ribosomal protein L15 [Harpegnathos saltator]	0.714	Down	0.0319	24.846
Cellular Component	GO:0005840	8	ribosome	0.0456921	Unigene13832_All	36 632 minus strand PREDICTED: similar to ribosomal protein L19e [Tribolium castaneum]	0.707	Down	0.00691	23.655
Cellular Component	GO:0005840	8	ribosome	0.0456921	Unigene13867_All	66 674 minus strand PREDICTED: 60S ribosomal protein L13a-like [Bombus impatiens]	0.767	Down	0.0117	23.136
Cellular Component	GO:0005840	8	ribosome	0.0456921	Unigene42637_All	1 393 S3a protein [Antheraea pernyi]	0.186	Down	0.00546	15.208
Cellular Component	GO:0005840	8	ribosome	0.0456921	Unigene7603_All	48 788 minus strand 40S ribosomal protein S6 [Acromyrmex echinatior]	0.820	Down	0.0199	28.505
Cellular Component	GO:0005840	8	ribosome	0.0456921	Unigene36112_All	2 256 minus strand ribosomal protein L13A [Antheraea yamamai]	0.160	Down	0.0165	9.8055
Cellular Component	GO:0005840	8	ribosome	0.0456921	CL1551.Contig2_All	79 903 minus strand PREDICTED: similar to ribosomal protein S2 [Tribolium castaneum]	0.823	Down	0.0049	29.45
Cellular Component	GO:0005840	8	ribosome	0.0456921	Unigene17279_All	85 258 minus strand 40S ribosomal protein S14 [Rhodnius prolixus]	0.710	Down	0.0144	6.314
Cellular Component	GO:0005791	9	rough endoplasmic reticulum	0.100885	Unigene8238_All	124 408 Sec61 protein translocation complex beta subunit [Triatoma infestans] >gi|344190604|gb|AEM97988.1| Sec61 protein translocation complex beta subunit [Dipetalogaster maximus]	0.645	Down	0.00377	10.073
Cellular Component	GO:0005791	9	rough endoplasmic reticulum	0.100885	Unigene18189_All	95 1948 PREDICTED: signal recognition particle receptor subunit alpha homolog isoform 2 [Nasonia vitripennis]	0.757	Down	0.0112	68.989
Cellular Component	GO:0048500	8	signal recognition particle	0.273615	CL3526.Contig1_All	118 1629 minus strand PREDICTED: similar to AGAP004610-PA [Tribolium castaneum]	0.759	Down	0.0366	55.407
Cellular Component	GO:0048500	8	signal recognition particle	0.273615	Unigene4339_All	229 2178 signal recognition particle [Aedes aegypti] >gi|108881114|gb|EAT45339.1| signal recognition particle [Aedes aegypti]	0.797	Down	0.0344	73.405
Cellular Component	GO:0015934	10	large ribosomal subunit	0.0467083	Unigene13832_All	36 632 minus strand PREDICTED: similar to ribosomal protein L19e [Tribolium castaneum]	0.707	Down	0.00691	23.655
Cellular Component	GO:0015934	10	large ribosomal subunit	0.0467083	Unigene13867_All	66 674 minus strand PREDICTED: 60S ribosomal protein L13a-like [Bombus impatiens]	0.767	Down	0.0117	23.136
Cellular Component	GO:0015934	10	large ribosomal subunit	0.0467083	Unigene37139_All	1 330 ribosomal protein L17 [Heliconius melpomene cythera]	0.355	Down	0.0289	12.657
Cellular Component	GO:1990904	3	ribonucleoprotein complex	0.0336131	Unigene6180_All	66 413 minus strand 60S ribosomal protein L34 [Acromyrmex echinatior]	0.630	Down	0.0198	13.788
Cellular Component	GO:1990904	3	ribonucleoprotein complex	0.0336131	Unigene20694_All	74 442 ribosomal protein L35 [Chrysomela tremula]	0.506	Down	0.0415	14.381
Cellular Component	GO:1990904	3	ribonucleoprotein complex	0.0336131	Unigene37139_All	1 330 ribosomal protein L17 [Heliconius melpomene cythera]	0.355	Down	0.0289	12.657
Cellular Component	GO:1990904	3	ribonucleoprotein complex	0.0336131	CL2767.Contig2_All	108 479 minus strand ribosomal protein S12 [Manduca sexta]	0.786	Down	0.007	13.62
Cellular Component	GO:1990904	3	ribonucleoprotein complex	0.0336131	Unigene4339_All	229 2178 signal recognition particle [Aedes aegypti] >gi|108881114|gb|EAT45339.1| signal recognition particle [Aedes aegypti]	0.797	Down	0.0344	73.405
Cellular Component	GO:1990904	3	ribonucleoprotein complex	0.0336131	Unigene11792_All	70 702 minus strand 60S ribosomal protein L15 [Harpegnathos saltator]	0.714	Down	0.0319	24.846
Cellular Component	GO:1990904	3	ribonucleoprotein complex	0.0336131	Unigene13832_All	36 632 minus strand PREDICTED: similar to ribosomal protein L19e [Tribolium castaneum]	0.707	Down	0.00691	23.655
Cellular Component	GO:1990904	3	ribonucleoprotein complex	0.0336131	Unigene13867_All	66 674 minus strand PREDICTED: 60S ribosomal protein L13a-like [Bombus impatiens]	0.767	Down	0.0117	23.136
Cellular Component	GO:1990904	3	ribonucleoprotein complex	0.0336131	CL3526.Contig1_All	118 1629 minus strand PREDICTED: similar to AGAP004610-PA [Tribolium castaneum]	0.759	Down	0.0366	55.407
Cellular Component	GO:1990904	3	ribonucleoprotein complex	0.0336131	Unigene42637_All	1 393 S3a protein [Antheraea pernyi]	0.186	Down	0.00546	15.208
Cellular Component	GO:1990904	3	ribonucleoprotein complex	0.0336131	Unigene7603_All	48 788 minus strand 40S ribosomal protein S6 [Acromyrmex echinatior]	0.820	Down	0.0199	28.505
Cellular Component	GO:1990904	3	ribonucleoprotein complex	0.0336131	Unigene36112_All	2 256 minus strand ribosomal protein L13A [Antheraea yamamai]	0.160	Down	0.0165	9.8055
Cellular Component	GO:1990904	3	ribonucleoprotein complex	0.0336131	CL1551.Contig2_All	79 903 minus strand PREDICTED: similar to ribosomal protein S2 [Tribolium castaneum]	0.823	Down	0.0049	29.45
Cellular Component	GO:1990904	3	ribonucleoprotein complex	0.0336131	Unigene17279_All	85 258 minus strand 40S ribosomal protein S14 [Rhodnius prolixus]	0.710	Down	0.0144	6.314
Cellular Component	GO:0030529	6	intracellular ribonucleoprotein complex	0.0336131	Unigene6180_All	66 413 minus strand 60S ribosomal protein L34 [Acromyrmex echinatior]	0.630	Down	0.0198	13.788
Cellular Component	GO:0030529	6	intracellular ribonucleoprotein complex	0.0336131	Unigene20694_All	74 442 ribosomal protein L35 [Chrysomela tremula]	0.506	Down	0.0415	14.381
Cellular Component	GO:0030529	6	intracellular ribonucleoprotein complex	0.0336131	Unigene37139_All	1 330 ribosomal protein L17 [Heliconius melpomene cythera]	0.355	Down	0.0289	12.657
Cellular Component	GO:0030529	6	intracellular ribonucleoprotein complex	0.0336131	CL2767.Contig2_All	108 479 minus strand ribosomal protein S12 [Manduca sexta]	0.786	Down	0.007	13.62
Cellular Component	GO:0030529	6	intracellular ribonucleoprotein complex	0.0336131	Unigene4339_All	229 2178 signal recognition particle [Aedes aegypti] >gi|108881114|gb|EAT45339.1| signal recognition particle [Aedes aegypti]	0.797	Down	0.0344	73.405
Cellular Component	GO:0030529	6	intracellular ribonucleoprotein complex	0.0336131	Unigene11792_All	70 702 minus strand 60S ribosomal protein L15 [Harpegnathos saltator]	0.714	Down	0.0319	24.846
Cellular Component	GO:0030529	6	intracellular ribonucleoprotein complex	0.0336131	Unigene13832_All	36 632 minus strand PREDICTED: similar to ribosomal protein L19e [Tribolium castaneum]	0.707	Down	0.00691	23.655
Cellular Component	GO:0030529	6	intracellular ribonucleoprotein complex	0.0336131	Unigene13867_All	66 674 minus strand PREDICTED: 60S ribosomal protein L13a-like [Bombus impatiens]	0.767	Down	0.0117	23.136
Cellular Component	GO:0030529	6	intracellular ribonucleoprotein complex	0.0336131	CL3526.Contig1_All	118 1629 minus strand PREDICTED: similar to AGAP004610-PA [Tribolium castaneum]	0.759	Down	0.0366	55.407
Cellular Component	GO:0030529	6	intracellular ribonucleoprotein complex	0.0336131	Unigene42637_All	1 393 S3a protein [Antheraea pernyi]	0.186	Down	0.00546	15.208
Cellular Component	GO:0030529	6	intracellular ribonucleoprotein complex	0.0336131	Unigene7603_All	48 788 minus strand 40S ribosomal protein S6 [Acromyrmex echinatior]	0.820	Down	0.0199	28.505
Cellular Component	GO:0030529	6	intracellular ribonucleoprotein complex	0.0336131	Unigene36112_All	2 256 minus strand ribosomal protein L13A [Antheraea yamamai]	0.160	Down	0.0165	9.8055
Cellular Component	GO:0030529	6	intracellular ribonucleoprotein complex	0.0336131	CL1551.Contig2_All	79 903 minus strand PREDICTED: similar to ribosomal protein S2 [Tribolium castaneum]	0.823	Down	0.0049	29.45
Cellular Component	GO:0030529	6	intracellular ribonucleoprotein complex	0.0336131	Unigene17279_All	85 258 minus strand 40S ribosomal protein S14 [Rhodnius prolixus]	0.710	Down	0.0144	6.314
Cellular Component	GO:0005783	8	endoplasmic reticulum	0.024056	Unigene20699_All	77 364 minus strand signal peptidase complex subunit 1-like protein [Triatoma matogrossensis]	0.733	Down	0.00649	11.27
Cellular Component	GO:0005783	8	endoplasmic reticulum	0.024056	Unigene20011_All	91 669 minus strand signal peptidase complex subunit SPC25 [Dipetalogaster maximus]	0.820	Down	0.0407	22.029
Cellular Component	GO:0005783	8	endoplasmic reticulum	0.024056	CL1996.Contig1_All	189 872 minus strand PREDICTED: endoplasmic reticulum resident protein 29-like [Acyrthosiphon pisum]	0.681	Down	0.00195	25.827
Cellular Component	GO:0005783	8	endoplasmic reticulum	0.024056	Unigene8238_All	124 408 Sec61 protein translocation complex beta subunit [Triatoma infestans] >gi|344190604|gb|AEM97988.1| Sec61 protein translocation complex beta subunit [Dipetalogaster maximus]	0.645	Down	0.00377	10.073
Cellular Component	GO:0005783	8	endoplasmic reticulum	0.024056	Unigene18189_All	95 1948 PREDICTED: signal recognition particle receptor subunit alpha homolog isoform 2 [Nasonia vitripennis]	0.757	Down	0.0112	68.989
Cellular Component	GO:0005783	8	endoplasmic reticulum	0.024056	Unigene25727_All	148 318 jagunal-like protein [Rhodnius prolixus]	0.625	Down	0.0195	6.4174
Cellular Component	GO:0042175	5	nuclear outer membrane-endoplasmic reticulum membrane network	0.0114049	Unigene20699_All	77 364 minus strand signal peptidase complex subunit 1-like protein [Triatoma matogrossensis]	0.733	Down	0.00649	11.27
Cellular Component	GO:0042175	5	nuclear outer membrane-endoplasmic reticulum membrane network	0.0114049	Unigene20011_All	91 669 minus strand signal peptidase complex subunit SPC25 [Dipetalogaster maximus]	0.820	Down	0.0407	22.029
Cellular Component	GO:0042175	5	nuclear outer membrane-endoplasmic reticulum membrane network	0.0114049	Unigene8238_All	124 408 Sec61 protein translocation complex beta subunit [Triatoma infestans] >gi|344190604|gb|AEM97988.1| Sec61 protein translocation complex beta subunit [Dipetalogaster maximus]	0.645	Down	0.00377	10.073
Cellular Component	GO:0042175	5	nuclear outer membrane-endoplasmic reticulum membrane network	0.0114049	Unigene18189_All	95 1948 PREDICTED: signal recognition particle receptor subunit alpha homolog isoform 2 [Nasonia vitripennis]	0.757	Down	0.0112	68.989
Cellular Component	GO:0042175	5	nuclear outer membrane-endoplasmic reticulum membrane network	0.0114049	Unigene25727_All	148 318 jagunal-like protein [Rhodnius prolixus]	0.625	Down	0.0195	6.4174
Cellular Component	GO:0030867	11	rough endoplasmic reticulum membrane	0.100885	Unigene8238_All	124 408 Sec61 protein translocation complex beta subunit [Triatoma infestans] >gi|344190604|gb|AEM97988.1| Sec61 protein translocation complex beta subunit [Dipetalogaster maximus]	0.645	Down	0.00377	10.073
Cellular Component	GO:0030867	11	rough endoplasmic reticulum membrane	0.100885	Unigene18189_All	95 1948 PREDICTED: signal recognition particle receptor subunit alpha homolog isoform 2 [Nasonia vitripennis]	0.757	Down	0.0112	68.989
Cellular Component	GO:0031224	4	intrinsic component of membrane	0.124402	CL5315.Contig1_All	52 825 minus strand PREDICTED: G-protein coupled receptor Mth2-like [Nasonia vitripennis]	0.830	Down	0.043	29.764
Cellular Component	GO:0031224	4	intrinsic component of membrane	0.124402	Unigene20011_All	91 669 minus strand signal peptidase complex subunit SPC25 [Dipetalogaster maximus]	0.820	Down	0.0407	22.029
Cellular Component	GO:0031224	4	intrinsic component of membrane	0.124402	Unigene7790_All	3 1208 minus strand PREDICTED: ATP-binding cassette sub-family D member 2-like [Acyrthosiphon pisum]	0.737	Down	0.0117	44.528
Cellular Component	GO:0031224	4	intrinsic component of membrane	0.124402	Unigene18871_All	110 670 minus strand signal peptidase 18 kDa subunit [Triatoma matogrossensis]	0.775	Down	0.00416	21.102
Cellular Component	GO:0031224	4	intrinsic component of membrane	0.124402	Unigene20699_All	77 364 minus strand signal peptidase complex subunit 1-like protein [Triatoma matogrossensis]	0.733	Down	0.00649	11.27
Cellular Component	GO:0031224	4	intrinsic component of membrane	0.124402	Unigene6584_All	149 787 PREDICTED: similar to snare protein sec22 [Tribolium castaneum]	0.709	Down	0.0296	24.654
Cellular Component	GO:0031224	4	intrinsic component of membrane	0.124402	Unigene10595_All	9 1373 minus strand sugar transporter 2 [Nilaparvata lugens]	0.756	Down	0.0173	49.419
Cellular Component	GO:0031224	4	intrinsic component of membrane	0.124402	Unigene17100_All	38 1192 signal peptide peptidase [Culex quinquefasciatus] >gi|167881598|gb|EDS44981.1| signal peptide peptidase [Culex quinquefasciatus]	0.782	Down	0.00989	42.778
Cellular Component	GO:0031224	4	intrinsic component of membrane	0.124402	Unigene5795_All	74 652 minus strand transmembrane emp24 domain trafficking protein 2 [Triatoma matogrossensis]	0.720	Down	0.00897	21.809
Cellular Component	GO:0031224	4	intrinsic component of membrane	0.124402	Unigene16084_All	175 978 minus strand surfeit 4-like protein [Bombyx mori] >gi|87248231|gb|ABD36168.1| surfeit 4-like protein [Bombyx mori]	0.646	Down	0.0157	30.666
Cellular Component	GO:0031224	4	intrinsic component of membrane	0.124402	CL2007.Contig1_All	13 567 minus strand PREDICTED: calcium channel flower-like isoform 1 [Bombus terrestris] >gi|350397911|ref|XP_003485028.1| PREDICTED: calcium channel flower-like isoform 2 [Bombus impatiens]	0.661	Down	0.0401	20.405
Cellular Component	GO:0031224	4	intrinsic component of membrane	0.124402	Unigene3567_All	2 1546 Transmembrane 9 superfamily member 3 [Camponotus floridanus]	0.801	Down	0.00309	59.215
Cellular Component	GO:0044391	9	ribosomal subunit	0.0900406	Unigene13832_All	36 632 minus strand PREDICTED: similar to ribosomal protein L19e [Tribolium castaneum]	0.707	Down	0.00691	23.655
Cellular Component	GO:0044391	9	ribosomal subunit	0.0900406	Unigene13867_All	66 674 minus strand PREDICTED: 60S ribosomal protein L13a-like [Bombus impatiens]	0.767	Down	0.0117	23.136
Cellular Component	GO:0044391	9	ribosomal subunit	0.0900406	Unigene37139_All	1 330 ribosomal protein L17 [Heliconius melpomene cythera]	0.355	Down	0.0289	12.657
Cellular Component	GO:0044391	9	ribosomal subunit	0.0900406	CL1551.Contig2_All	79 903 minus strand PREDICTED: similar to ribosomal protein S2 [Tribolium castaneum]	0.823	Down	0.0049	29.45
Cellular Component	GO:0043232	7	intracellular non-membrane-bounded organelle	0.0703045	Unigene6180_All	66 413 minus strand 60S ribosomal protein L34 [Acromyrmex echinatior]	0.630	Down	0.0198	13.788
Cellular Component	GO:0043232	7	intracellular non-membrane-bounded organelle	0.0703045	Unigene20694_All	74 442 ribosomal protein L35 [Chrysomela tremula]	0.506	Down	0.0415	14.381
Cellular Component	GO:0043232	7	intracellular non-membrane-bounded organelle	0.0703045	Unigene37139_All	1 330 ribosomal protein L17 [Heliconius melpomene cythera]	0.355	Down	0.0289	12.657
Cellular Component	GO:0043232	7	intracellular non-membrane-bounded organelle	0.0703045	CL2767.Contig2_All	108 479 minus strand ribosomal protein S12 [Manduca sexta]	0.786	Down	0.007	13.62
Cellular Component	GO:0043232	7	intracellular non-membrane-bounded organelle	0.0703045	Unigene11792_All	70 702 minus strand 60S ribosomal protein L15 [Harpegnathos saltator]	0.714	Down	0.0319	24.846
Cellular Component	GO:0043232	7	intracellular non-membrane-bounded organelle	0.0703045	Unigene13832_All	36 632 minus strand PREDICTED: similar to ribosomal protein L19e [Tribolium castaneum]	0.707	Down	0.00691	23.655
Cellular Component	GO:0043232	7	intracellular non-membrane-bounded organelle	0.0703045	Unigene13867_All	66 674 minus strand PREDICTED: 60S ribosomal protein L13a-like [Bombus impatiens]	0.767	Down	0.0117	23.136
Cellular Component	GO:0043232	7	intracellular non-membrane-bounded organelle	0.0703045	Unigene42637_All	1 393 S3a protein [Antheraea pernyi]	0.186	Down	0.00546	15.208
Cellular Component	GO:0043232	7	intracellular non-membrane-bounded organelle	0.0703045	Unigene7603_All	48 788 minus strand 40S ribosomal protein S6 [Acromyrmex echinatior]	0.820	Down	0.0199	28.505
Cellular Component	GO:0043232	7	intracellular non-membrane-bounded organelle	0.0703045	Unigene36112_All	2 256 minus strand ribosomal protein L13A [Antheraea yamamai]	0.160	Down	0.0165	9.8055
Cellular Component	GO:0043232	7	intracellular non-membrane-bounded organelle	0.0703045	CL1551.Contig2_All	79 903 minus strand PREDICTED: similar to ribosomal protein S2 [Tribolium castaneum]	0.823	Down	0.0049	29.45
Cellular Component	GO:0043232	7	intracellular non-membrane-bounded organelle	0.0703045	Unigene17279_All	85 258 minus strand 40S ribosomal protein S14 [Rhodnius prolixus]	0.710	Down	0.0144	6.314
Cellular Component	GO:0043232	7	intracellular non-membrane-bounded organelle	0.0703045	Unigene439_All	161 3667 PREDICTED: structural maintenance of chromosomes protein 2-like [Bombus impatiens]	0.254	Down	0.0288	133.98
Cellular Component	GO:0012505	4	endomembrane system	0.29287	Unigene20699_All	77 364 minus strand signal peptidase complex subunit 1-like protein [Triatoma matogrossensis]	0.733	Down	0.00649	11.27
Cellular Component	GO:0012505	4	endomembrane system	0.29287	Unigene20011_All	91 669 minus strand signal peptidase complex subunit SPC25 [Dipetalogaster maximus]	0.820	Down	0.0407	22.029
Cellular Component	GO:0012505	4	endomembrane system	0.29287	CL1996.Contig1_All	189 872 minus strand PREDICTED: endoplasmic reticulum resident protein 29-like [Acyrthosiphon pisum]	0.681	Down	0.00195	25.827
Cellular Component	GO:0012505	4	endomembrane system	0.29287	Unigene8238_All	124 408 Sec61 protein translocation complex beta subunit [Triatoma infestans] >gi|344190604|gb|AEM97988.1| Sec61 protein translocation complex beta subunit [Dipetalogaster maximus]	0.645	Down	0.00377	10.073
Cellular Component	GO:0012505	4	endomembrane system	0.29287	Unigene18189_All	95 1948 PREDICTED: signal recognition particle receptor subunit alpha homolog isoform 2 [Nasonia vitripennis]	0.757	Down	0.0112	68.989
Cellular Component	GO:0012505	4	endomembrane system	0.29287	Unigene25727_All	148 318 jagunal-like protein [Rhodnius prolixus]	0.625	Down	0.0195	6.4174
Cellular Component	GO:0016021	5	integral component of membrane	0.124402	CL5315.Contig1_All	52 825 minus strand PREDICTED: G-protein coupled receptor Mth2-like [Nasonia vitripennis]	0.830	Down	0.043	29.764
Cellular Component	GO:0016021	5	integral component of membrane	0.124402	Unigene20011_All	91 669 minus strand signal peptidase complex subunit SPC25 [Dipetalogaster maximus]	0.820	Down	0.0407	22.029
Cellular Component	GO:0016021	5	integral component of membrane	0.124402	Unigene7790_All	3 1208 minus strand PREDICTED: ATP-binding cassette sub-family D member 2-like [Acyrthosiphon pisum]	0.737	Down	0.0117	44.528
Cellular Component	GO:0016021	5	integral component of membrane	0.124402	Unigene18871_All	110 670 minus strand signal peptidase 18 kDa subunit [Triatoma matogrossensis]	0.775	Down	0.00416	21.102
Cellular Component	GO:0016021	5	integral component of membrane	0.124402	Unigene20699_All	77 364 minus strand signal peptidase complex subunit 1-like protein [Triatoma matogrossensis]	0.733	Down	0.00649	11.27
Cellular Component	GO:0016021	5	integral component of membrane	0.124402	Unigene6584_All	149 787 PREDICTED: similar to snare protein sec22 [Tribolium castaneum]	0.709	Down	0.0296	24.654
Cellular Component	GO:0016021	5	integral component of membrane	0.124402	Unigene10595_All	9 1373 minus strand sugar transporter 2 [Nilaparvata lugens]	0.756	Down	0.0173	49.419
Cellular Component	GO:0016021	5	integral component of membrane	0.124402	Unigene17100_All	38 1192 signal peptide peptidase [Culex quinquefasciatus] >gi|167881598|gb|EDS44981.1| signal peptide peptidase [Culex quinquefasciatus]	0.782	Down	0.00989	42.778
Cellular Component	GO:0016021	5	integral component of membrane	0.124402	Unigene5795_All	74 652 minus strand transmembrane emp24 domain trafficking protein 2 [Triatoma matogrossensis]	0.720	Down	0.00897	21.809
Cellular Component	GO:0016021	5	integral component of membrane	0.124402	Unigene16084_All	175 978 minus strand surfeit 4-like protein [Bombyx mori] >gi|87248231|gb|ABD36168.1| surfeit 4-like protein [Bombyx mori]	0.646	Down	0.0157	30.666
Cellular Component	GO:0016021	5	integral component of membrane	0.124402	CL2007.Contig1_All	13 567 minus strand PREDICTED: calcium channel flower-like isoform 1 [Bombus terrestris] >gi|350397911|ref|XP_003485028.1| PREDICTED: calcium channel flower-like isoform 2 [Bombus impatiens]	0.661	Down	0.0401	20.405
Cellular Component	GO:0016021	5	integral component of membrane	0.124402	Unigene3567_All	2 1546 Transmembrane 9 superfamily member 3 [Camponotus floridanus]	0.801	Down	0.00309	59.215
Cellular Component	GO:0044432	9	endoplasmic reticulum part	0.00205311	Unigene20699_All	77 364 minus strand signal peptidase complex subunit 1-like protein [Triatoma matogrossensis]	0.733	Down	0.00649	11.27
Cellular Component	GO:0044432	9	endoplasmic reticulum part	0.00205311	Unigene20011_All	91 669 minus strand signal peptidase complex subunit SPC25 [Dipetalogaster maximus]	0.820	Down	0.0407	22.029
Cellular Component	GO:0044432	9	endoplasmic reticulum part	0.00205311	CL1996.Contig1_All	189 872 minus strand PREDICTED: endoplasmic reticulum resident protein 29-like [Acyrthosiphon pisum]	0.681	Down	0.00195	25.827
Cellular Component	GO:0044432	9	endoplasmic reticulum part	0.00205311	Unigene8238_All	124 408 Sec61 protein translocation complex beta subunit [Triatoma infestans] >gi|344190604|gb|AEM97988.1| Sec61 protein translocation complex beta subunit [Dipetalogaster maximus]	0.645	Down	0.00377	10.073
Cellular Component	GO:0044432	9	endoplasmic reticulum part	0.00205311	Unigene18189_All	95 1948 PREDICTED: signal recognition particle receptor subunit alpha homolog isoform 2 [Nasonia vitripennis]	0.757	Down	0.0112	68.989
Cellular Component	GO:0044432	9	endoplasmic reticulum part	0.00205311	Unigene25727_All	148 318 jagunal-like protein [Rhodnius prolixus]	0.625	Down	0.0195	6.4174
Molecular Function	GO:0030695	5	GTPase regulator activity	0.408212	CL4701.Contig1_All	46 1653 ADP-ribosylation factor GTPase activating protein 2 [Acyrthosiphon pisum]	0.768	Down	0.00599	60.09
Molecular Function	GO:0030695	5	GTPase regulator activity	0.408212	Unigene7767_All	158 1099 minus strand PREDICTED: similar to arf gtpase-activating protein [Tribolium castaneum]	0.701	Down	0.0202	34.952
Molecular Function	GO:0061134	4	peptidase regulator activity	0.00139759	Unigene40526_All	13 234 minus strand pacifastin [Eriocheir sinensis]	0.167	Down	0.0322	8.0454
Molecular Function	GO:0061134	4	peptidase regulator activity	0.00139759	Unigene38038_All	146 481 pacifastin light chain precursor [Pacifastacus leniusculus]	0.175	Down	0.0372	12.293
Molecular Function	GO:0061134	4	peptidase regulator activity	0.00139759	CL2155.Contig1_All	347 967 PREDICTED: similar to cathepsin F-like cysteine protease [Tribolium castaneum]	0.391	Down	0.00103	23.428
Molecular Function	GO:0061134	4	peptidase regulator activity	0.00139759	CL33.Contig1_All	63 1043 minus strand cathepsin F-like cysteine protease [Plautia stali]	0.249	Down	0.00212	37.184
Molecular Function	GO:0061134	4	peptidase regulator activity	0.00139759	Unigene11833_All	106 495 minus strand cathepsin F-like cysteine protease [Plautia stali]	0.782	Down	0.00641	14.535
Molecular Function	GO:0061134	4	peptidase regulator activity	0.00139759	Unigene20247_All	240 2204 PREDICTED: similar to f-spondin [Tribolium castaneum]	0.768	Down	0.0393	73.877
Molecular Function	GO:0003735	3	structural constituent of ribosome	0.0249334	Unigene6180_All	66 413 minus strand 60S ribosomal protein L34 [Acromyrmex echinatior]	0.630	Down	0.0198	13.788
Molecular Function	GO:0003735	3	structural constituent of ribosome	0.0249334	Unigene20694_All	74 442 ribosomal protein L35 [Chrysomela tremula]	0.506	Down	0.0415	14.381
Molecular Function	GO:0003735	3	structural constituent of ribosome	0.0249334	Unigene37139_All	1 330 ribosomal protein L17 [Heliconius melpomene cythera]	0.355	Down	0.0289	12.657
Molecular Function	GO:0003735	3	structural constituent of ribosome	0.0249334	CL2767.Contig2_All	108 479 minus strand ribosomal protein S12 [Manduca sexta]	0.786	Down	0.007	13.62
Molecular Function	GO:0003735	3	structural constituent of ribosome	0.0249334	Unigene11792_All	70 702 minus strand 60S ribosomal protein L15 [Harpegnathos saltator]	0.714	Down	0.0319	24.846
Molecular Function	GO:0003735	3	structural constituent of ribosome	0.0249334	Unigene13832_All	36 632 minus strand PREDICTED: similar to ribosomal protein L19e [Tribolium castaneum]	0.707	Down	0.00691	23.655
Molecular Function	GO:0003735	3	structural constituent of ribosome	0.0249334	Unigene13867_All	66 674 minus strand PREDICTED: 60S ribosomal protein L13a-like [Bombus impatiens]	0.767	Down	0.0117	23.136
Molecular Function	GO:0003735	3	structural constituent of ribosome	0.0249334	Unigene42637_All	1 393 S3a protein [Antheraea pernyi]	0.186	Down	0.00546	15.208
Molecular Function	GO:0003735	3	structural constituent of ribosome	0.0249334	Unigene7603_All	48 788 minus strand 40S ribosomal protein S6 [Acromyrmex echinatior]	0.820	Down	0.0199	28.505
Molecular Function	GO:0003735	3	structural constituent of ribosome	0.0249334	Unigene36112_All	2 256 minus strand ribosomal protein L13A [Antheraea yamamai]	0.160	Down	0.0165	9.8055
Molecular Function	GO:0003735	3	structural constituent of ribosome	0.0249334	CL1551.Contig2_All	79 903 minus strand PREDICTED: similar to ribosomal protein S2 [Tribolium castaneum]	0.823	Down	0.0049	29.45
Molecular Function	GO:0003735	3	structural constituent of ribosome	0.0249334	Unigene17279_All	85 258 minus strand 40S ribosomal protein S14 [Rhodnius prolixus]	0.710	Down	0.0144	6.314
Molecular Function	GO:0003924	8	GTPase activity	0.589039	CL732.Contig1_All	89 1753 minus strand PREDICTED: eukaryotic peptide chain release factor GTP-binding subunit ERF3B-like [Bombus terrestris]	0.828	Down	0.0208	60.951
Molecular Function	GO:0003924	8	GTPase activity	0.589039	CL3526.Contig1_All	118 1629 minus strand PREDICTED: similar to AGAP004610-PA [Tribolium castaneum]	0.759	Down	0.0366	55.407
Molecular Function	GO:0003924	8	GTPase activity	0.589039	Unigene18189_All	95 1948 PREDICTED: signal recognition particle receptor subunit alpha homolog isoform 2 [Nasonia vitripennis]	0.757	Down	0.0112	68.989
Molecular Function	GO:0008483	5	transaminase activity	0.408212	Unigene18212_All	81 1451 minus strand Alanine--glyoxylate aminotransferase 2-like protein [Acromyrmex echinatior]	0.745	Down	0.0117	51.075
Molecular Function	GO:0008483	5	transaminase activity	0.408212	CL4264.Contig3_All	71 2146 Glucosamine--fructose-6-phosphate aminotransferase [isomerizing] 2 [Harpegnathos saltator]	0.723	Down	0.013	77.776
Molecular Function	GO:0004497	4	monooxygenase activity	0.168739	Unigene18170_All	71 1378 phenylalanine-tryptophan hydroxylase [Gryllus bimaculatus]	0.623	Down	0.0499	49.963
Molecular Function	GO:0004497	4	monooxygenase activity	0.168739	Unigene14051_All	191 1885 minus strand AGAP006023-PA [Anopheles gambiae str. PEST] >gi|157015912|gb|EAA44132.3| AGAP006023-PA [Anopheles gambiae str. PEST]	0.400	Down	0.0399	64.477
Molecular Function	GO:0004497	4	monooxygenase activity	0.168739	Unigene18944_All	50 1312 minus strand PREDICTED: flavin-containing monooxygenase FMO GS-OX-like 3-like [Bombus terrestris]	0.646	Down	0.014	48.002
Molecular Function	GO:0042302	3	structural constituent of cuticle	2.64211e-07	CL3443.Contig1_All	30 434 PREDICTED: similar to Larval cuticle protein A3A (TM-A3A) (TM-LCP A3A) [Tribolium castaneum]	0.325	Down	0.00177	14.135
Molecular Function	GO:0042302	3	structural constituent of cuticle	2.64211e-07	CL3443.Contig2_All	16 342 cuticular protein CPR71B [Danaus plexippus]	0.312	Down	0.00741	11.316
Molecular Function	GO:0042302	3	structural constituent of cuticle	2.64211e-07	Unigene10931_All	41 409 AGAP006864-PA [Anopheles gambiae str. PEST] >gi|55245971|gb|EAA45480.2| AGAP006864-PA [Anopheles gambiae str. PEST]	0.446	Down	0.0309	14.067
Molecular Function	GO:0042302	3	structural constituent of cuticle	2.64211e-07	Unigene5823_All	93 824 minus strand AGAP006261-PA [Anopheles gambiae str. PEST] >gi|157016133|gb|EAL40041.3| AGAP006261-PA [Anopheles gambiae str. PEST]	0.665	Down	0.0124	27.24
Molecular Function	GO:0042302	3	structural constituent of cuticle	2.64211e-07	CL1552.Contig1_All	73 567 PREDICTED: similar to Larval cuticle protein A3A (TM-A3A) (TM-LCP A3A) [Tribolium castaneum]	0.695	Down	0.00382	17.083
Molecular Function	GO:0042302	3	structural constituent of cuticle	2.64211e-07	Unigene17155_All	1 276 minus strand cuticle protein-like protein [Triatoma matogrossensis]	0.652	Down	0.0437	9.7704
Molecular Function	GO:0042302	3	structural constituent of cuticle	2.64211e-07	CL2908.Contig1_All	107 484 cuticular protein 58 precursor [Acyrthosiphon pisum] >gi|239792554|dbj|BAH72607.1| ACYPI003073 [Acyrthosiphon pisum]	0.706	Down	0.0461	13.942
Molecular Function	GO:0042302	3	structural constituent of cuticle	2.64211e-07	Unigene10803_All	83 427 cuticle protein 34 [Anopheles gambiae] >gi|162532640|gb|ABY16724.1| cuticle protein 34 [Anopheles gambiae]	0.546	Down	0.0134	12.951
Molecular Function	GO:0042302	3	structural constituent of cuticle	2.64211e-07	Unigene310_All	30 401 cuticular protein RR-2 motif 79 [Danaus plexippus]	0.441	Down	0.000205	13.412
Molecular Function	GO:0042302	3	structural constituent of cuticle	2.64211e-07	CL2553.Contig2_All	34 492 minus strand PREDICTED: similar to Larval cuticle protein A3A (TM-A3A) (TM-LCP A3A) [Tribolium castaneum]	0.768	Down	0.0494	15.739
Molecular Function	GO:0042302	3	structural constituent of cuticle	2.64211e-07	Unigene18301_All	8 940 GK21628 [Drosophila willistoni] >gi|194159066|gb|EDW73967.1| GK21628 [Drosophila willistoni]	0.602	Down	0.0333	29.651
Molecular Function	GO:0042302	3	structural constituent of cuticle	2.64211e-07	Unigene20546_All	2 244 minus strand cuticle protein-like protein [Triatoma matogrossensis]	0.514	Down	0.00927	8.0703
Molecular Function	GO:0042302	3	structural constituent of cuticle	2.64211e-07	CL2553.Contig1_All	1 522 PREDICTED: cuticle protein-like [Bombus terrestris]	0.569	Down	0.00149	17.757
Molecular Function	GO:0042302	3	structural constituent of cuticle	2.64211e-07	Unigene10402_All	25 444 cuticle protein-like protein [Triatoma matogrossensis]	0.312	Down	0.000879	14.391
Molecular Function	GO:0042302	3	structural constituent of cuticle	2.64211e-07	CL5055.Contig1_All	41 409 AGAP006864-PA [Anopheles gambiae str. PEST] >gi|55245971|gb|EAA45480.2| AGAP006864-PA [Anopheles gambiae str. PEST]	0.409	Down	0.0319	14.051
Molecular Function	GO:0042302	3	structural constituent of cuticle	2.64211e-07	CL2549.Contig1_All	63 569 minus strand cuticular protein CPR67A [Papilio xuthus]	0.602	Down	0.0434	17.509
Molecular Function	GO:0042302	3	structural constituent of cuticle	2.64211e-07	CL881.Contig1_All	53 631 PREDICTED: similar to Larval cuticle protein A3A (TM-A3A) (TM-LCP A3A) [Tribolium castaneum]	0.716	Down	0.0153	19.25
Molecular Function	GO:0016769	4	transferase activity, transferring nitrogenous groups	0.408212	Unigene18212_All	81 1451 minus strand Alanine--glyoxylate aminotransferase 2-like protein [Acromyrmex echinatior]	0.745	Down	0.0117	51.075
Molecular Function	GO:0016769	4	transferase activity, transferring nitrogenous groups	0.408212	CL4264.Contig3_All	71 2146 Glucosamine--fructose-6-phosphate aminotransferase [isomerizing] 2 [Harpegnathos saltator]	0.723	Down	0.013	77.776
Molecular Function	GO:0051087	4	chaperone binding	0.211991	Unigene7889_All	"121 831 minus strand PREDICTED: grpE protein homolog 1, mitochondrial-like [Nasonia vitripennis]"	0.826	Down	0.00733	26.969
Molecular Function	GO:0051087	4	chaperone binding	0.211991	Unigene6574_All	93 1130 Activator of 90 kDa heat shock protein ATPase-like protein 1 [Acromyrmex echinatior]	0.643	Down	0.00466	39.81
Molecular Function	GO:0004553	5	hydrolase activity, hydrolyzing O-glycosyl compounds	0.241339	Unigene9901_All	178 1401 minus strand imaginal disk growth factor precursor [Acyrthosiphon pisum]	0.692	Down	0.0211	45.565
Molecular Function	GO:0004553	5	hydrolase activity, hydrolyzing O-glycosyl compounds	0.241339	CL3932.Contig1_All	105 1331 imaginal disc growth factor [Bombus ignitus]	0.702	Down	0.0136	45.732
Molecular Function	GO:0004553	5	hydrolase activity, hydrolyzing O-glycosyl compounds	0.241339	Unigene7845_All	85 1362 imaginal disc growth factor-like protein [Mamestra brassicae]	0.670	Down	0.000776	47.474
Molecular Function	GO:0004553	5	hydrolase activity, hydrolyzing O-glycosyl compounds	0.241339	Unigene1519_All	"235 1605 minus strand RecName: Full=Myrosinase 1; AltName: Full=Beta-glucosidase 1; AltName: Full=Beta-thioglucosidase 1; AltName: Full=Beta-thioglucosidase glucohydrolase 1; AltName: Full=Sinigrinase 1; AltName: Full=Thioglucosidase 1 >gi|83753522|pdb|1WCG|A Chain A, Aphid Myrosinase >gi|83753523|pdb|1WCG|B Chain B, Aphid Myrosinase >gi|16564883|gb|AAL25999.1|AF203780_1 thioglucosidase [Brevico…	0.766	Down	0.0292	52.881
Molecular Function	GO:0004553	5	hydrolase activity, hydrolyzing O-glycosyl compounds	0.241339	Unigene362_All	187 1836 minus strand beta-N-acetylglucosaminidase 1 precursor [Bombyx mori] >gi|139004970|dbj|BAF52531.1| beta-N-acetylglucosaminidase 1 [Bombyx mori]	0.815	Down	0.0496	62.77
Molecular Function	GO:0008135	6	translation factor activity, RNA binding	0.393653	Unigene10693_All	165 494 translation initiation factor 1 [Triatoma infestans]	0.764	Down	0.00977	12.402
Molecular Function	GO:0008135	6	translation factor activity, RNA binding	0.393653	Unigene11967_All	94 1236 minus strand PREDICTED: eukaryotic translation initiation factor 3 subunit M-like [Bombus terrestris] >gi|350417143|ref|XP_003491277.1| PREDICTED: eukaryotic translation initiation factor 3 subunit M-like [Bombus impatiens]	0.747	Down	0.00132	43.3
Molecular Function	GO:0008135	6	translation factor activity, RNA binding	0.393653	CL4142.Contig2_All	457 1764 minus strand Eukaryotic peptide chain release factor subunit 1 [Acromyrmex echinatior]	0.732	Down	0.0094	49.047
Molecular Function	GO:0004190	7	aspartic-type endopeptidase activity	4.26419e-05	Unigene7919_All	65 1111 minus strand PREDICTED: similar to cathepsin D isoform 1 [Tribolium castaneum]	0.462	Down	0.0203	38.522
Molecular Function	GO:0004190	7	aspartic-type endopeptidase activity	4.26419e-05	CL1726.Contig2_All	80 1168 PREDICTED: similar to cathepsin D isoform 1 [Tribolium castaneum]	0.333	Down	0.00211	40.422
Molecular Function	GO:0004190	7	aspartic-type endopeptidase activity	4.26419e-05	Unigene3551_All	221 1162 PREDICTED: cathepsin D-like [Oreochromis niloticus]	0.724	Down	0.0187	35.564
Molecular Function	GO:0004190	7	aspartic-type endopeptidase activity	4.26419e-05	Unigene17100_All	38 1192 signal peptide peptidase [Culex quinquefasciatus] >gi|167881598|gb|EDS44981.1| signal peptide peptidase [Culex quinquefasciatus]	0.782	Down	0.00989	42.778
Molecular Function	GO:0004190	7	aspartic-type endopeptidase activity	4.26419e-05	Unigene14022_All	40 1200 minus strand PREDICTED: lysosomal aspartic protease [Apis mellifera]	0.598	Down	0.0298	42.106
Molecular Function	GO:0004190	7	aspartic-type endopeptidase activity	4.26419e-05	Unigene3569_All	25 1173 minus strand aspartyl protease [Triatoma infestans]	0.700	Down	0.000384	42.503
Molecular Function	GO:0008081	6	phosphoric diester hydrolase activity	0.408212	CL60.Contig2_All	199 537 minus strand PREDICTED: similar to Phosphatidylinositol-specific phospholipase C X domain-containing protein 2 (PI-PLC X domain-containing protein 2) [Ciona intestinalis]	0.348	Down	0.0163	12.514
Molecular Function	GO:0008081	6	phosphoric diester hydrolase activity	0.408212	CL5389.Contig1_All	175 1068 minus strand PREDICTED: PI-PLC X domain-containing protein 1 [Apis mellifera]	0.406	Down	0.0215	34.122
Molecular Function	GO:0098772	2	molecular function regulator	0.000104138	Unigene40526_All	13 234 minus strand pacifastin [Eriocheir sinensis]	0.167	Down	0.0322	8.0454
Molecular Function	GO:0098772	2	molecular function regulator	0.000104138	Unigene7767_All	158 1099 minus strand PREDICTED: similar to arf gtpase-activating protein [Tribolium castaneum]	0.701	Down	0.0202	34.952
Molecular Function	GO:0098772	2	molecular function regulator	0.000104138	Unigene6574_All	93 1130 Activator of 90 kDa heat shock protein ATPase-like protein 1 [Acromyrmex echinatior]	0.643	Down	0.00466	39.81
Molecular Function	GO:0098772	2	molecular function regulator	0.000104138	CL2155.Contig1_All	347 967 PREDICTED: similar to cathepsin F-like cysteine protease [Tribolium castaneum]	0.391	Down	0.00103	23.428
Molecular Function	GO:0098772	2	molecular function regulator	0.000104138	Unigene20247_All	240 2204 PREDICTED: similar to f-spondin [Tribolium castaneum]	0.768	Down	0.0393	73.877
Molecular Function	GO:0098772	2	molecular function regulator	0.000104138	Unigene38038_All	146 481 pacifastin light chain precursor [Pacifastacus leniusculus]	0.175	Down	0.0372	12.293
Molecular Function	GO:0098772	2	molecular function regulator	0.000104138	CL4701.Contig1_All	46 1653 ADP-ribosylation factor GTPase activating protein 2 [Acyrthosiphon pisum]	0.768	Down	0.00599	60.09
Molecular Function	GO:0098772	2	molecular function regulator	0.000104138	Unigene7889_All	"121 831 minus strand PREDICTED: grpE protein homolog 1, mitochondrial-like [Nasonia vitripennis]"	0.826	Down	0.00733	26.969
Molecular Function	GO:0098772	2	molecular function regulator	0.000104138	Unigene11833_All	106 495 minus strand cathepsin F-like cysteine protease [Plautia stali]	0.782	Down	0.00641	14.535
Molecular Function	GO:0098772	2	molecular function regulator	0.000104138	CL33.Contig1_All	63 1043 minus strand cathepsin F-like cysteine protease [Plautia stali]	0.249	Down	0.00212	37.184
Molecular Function	GO:0098772	2	molecular function regulator	0.000104138	CL5353.Contig1_All	3 3851 minus strand PREDICTED: intersectin-1-like [Bombus terrestris]	0.813	Down	0.0466	141.17
Molecular Function	GO:0061135	5	endopeptidase regulator activity	0.0246135	CL2155.Contig1_All	347 967 PREDICTED: similar to cathepsin F-like cysteine protease [Tribolium castaneum]	0.391	Down	0.00103	23.428
Molecular Function	GO:0061135	5	endopeptidase regulator activity	0.0246135	CL33.Contig1_All	63 1043 minus strand cathepsin F-like cysteine protease [Plautia stali]	0.249	Down	0.00212	37.184
Molecular Function	GO:0061135	5	endopeptidase regulator activity	0.0246135	Unigene11833_All	106 495 minus strand cathepsin F-like cysteine protease [Plautia stali]	0.782	Down	0.00641	14.535
Molecular Function	GO:0061135	5	endopeptidase regulator activity	0.0246135	Unigene20247_All	240 2204 PREDICTED: similar to f-spondin [Tribolium castaneum]	0.768	Down	0.0393	73.877
Molecular Function	GO:0016829	3	lyase activity	0.349038	Unigene19067_All	83 1663 minus strand Sphingosine-1-phosphate lyase [Harpegnathos saltator]	0.735	Down	0.0242	59.033
Molecular Function	GO:0016829	3	lyase activity	0.349038	Unigene18080_All	164 469 minus strand PREDICTED: similar to pterin-4a-carbinolamine dehydratase CG1963-PA [Tribolium castaneum]	0.833	Down	0.0221	11.702
Molecular Function	GO:0016829	3	lyase activity	0.349038	Unigene1556_All	30 827 minus strand ACYPI002405 [Acyrthosiphon pisum]	0.782	Down	0.0201	29.994
Molecular Function	GO:0016829	3	lyase activity	0.349038	Unigene14014_All	"90 1181 fructose 1,6-bisphosphate aldolase [Schistocerca gregaria]"	0.728	Down	0.00158	39.841
Molecular Function	GO:0016836	5	hydro-lyase activity	0.534029	Unigene18080_All	164 469 minus strand PREDICTED: similar to pterin-4a-carbinolamine dehydratase CG1963-PA [Tribolium castaneum]	0.833	Down	0.0221	11.702
Molecular Function	GO:0016836	5	hydro-lyase activity	0.534029	Unigene1556_All	30 827 minus strand ACYPI002405 [Acyrthosiphon pisum]	0.782	Down	0.0201	29.994
Molecular Function	GO:0008312	6	7S RNA binding	0.24869	CL3526.Contig1_All	118 1629 minus strand PREDICTED: similar to AGAP004610-PA [Tribolium castaneum]	0.759	Down	0.0366	55.407
Molecular Function	GO:0008312	6	7S RNA binding	0.24869	Unigene4339_All	229 2178 signal recognition particle [Aedes aegypti] >gi|108881114|gb|EAT45339.1| signal recognition particle [Aedes aegypti]	0.797	Down	0.0344	73.405
Molecular Function	GO:0016798	4	hydrolase activity, acting on glycosyl bonds	0.261998	Unigene9901_All	178 1401 minus strand imaginal disk growth factor precursor [Acyrthosiphon pisum]	0.692	Down	0.0211	45.565
Molecular Function	GO:0016798	4	hydrolase activity, acting on glycosyl bonds	0.261998	CL3932.Contig1_All	105 1331 imaginal disc growth factor [Bombus ignitus]	0.702	Down	0.0136	45.732
Molecular Function	GO:0016798	4	hydrolase activity, acting on glycosyl bonds	0.261998	Unigene7845_All	85 1362 imaginal disc growth factor-like protein [Mamestra brassicae]	0.670	Down	0.000776	47.474
Molecular Function	GO:0016798	4	hydrolase activity, acting on glycosyl bonds	0.261998	Unigene1519_All	"235 1605 minus strand RecName: Full=Myrosinase 1; AltName: Full=Beta-glucosidase 1; AltName: Full=Beta-thioglucosidase 1; AltName: Full=Beta-thioglucosidase glucohydrolase 1; AltName: Full=Sinigrinase 1; AltName: Full=Thioglucosidase 1 >gi|83753522|pdb|1WCG|A Chain A, Aphid Myrosinase >gi|83753523|pdb|1WCG|B Chain B, Aphid Myrosinase >gi|16564883|gb|AAL25999.1|AF203780_1 thioglucosidase [Brevico…	0.766	Down	0.0292	52.881
Molecular Function	GO:0016798	4	hydrolase activity, acting on glycosyl bonds	0.261998	Unigene362_All	187 1836 minus strand beta-N-acetylglucosaminidase 1 precursor [Bombyx mori] >gi|139004970|dbj|BAF52531.1| beta-N-acetylglucosaminidase 1 [Bombyx mori]	0.815	Down	0.0496	62.77
Molecular Function	GO:0050661	6	NADP binding	0.379261	Unigene18944_All	50 1312 minus strand PREDICTED: flavin-containing monooxygenase FMO GS-OX-like 3-like [Bombus terrestris]	0.646	Down	0.014	48.002
Molecular Function	GO:0050661	6	NADP binding	0.379261	Unigene9670_All	100 642 minus strand GI23507 [Drosophila mojavensis] >gi|193915264|gb|EDW14131.1| GI23507 [Drosophila mojavensis]	0.746	Down	0.00259	20.452
Molecular Function	GO:0003774	8	motor activity	0.682352	CL3444.Contig6_All	248 1921 PREDICTED: kinesin light chain-like isoform 2 [Bombus terrestris] >gi|350396095|ref|XP_003484440.1| PREDICTED: kinesin light chain-like isoform 2 [Bombus impatiens]	0.791	Down	0.0166	62.793
Molecular Function	GO:0003774	8	motor activity	0.682352	CL3845.Contig2_All	"1 621 minus strand myosin heavy chain, nonmuscle or smooth muscle [Aedes aegypti] >gi|108878533|gb|EAT42758.1| myosin heavy chain, nonmuscle or smooth muscle [Aedes aegypti]"	0.831	Down	0.0304	23.176
Molecular Function	GO:0060589	4	nucleoside-triphosphatase regulator activity	0.0246135	CL4701.Contig1_All	46 1653 ADP-ribosylation factor GTPase activating protein 2 [Acyrthosiphon pisum]	0.768	Down	0.00599	60.09
Molecular Function	GO:0060589	4	nucleoside-triphosphatase regulator activity	0.0246135	Unigene7767_All	158 1099 minus strand PREDICTED: similar to arf gtpase-activating protein [Tribolium castaneum]	0.701	Down	0.0202	34.952
Molecular Function	GO:0060589	4	nucleoside-triphosphatase regulator activity	0.0246135	Unigene7889_All	"121 831 minus strand PREDICTED: grpE protein homolog 1, mitochondrial-like [Nasonia vitripennis]"	0.826	Down	0.00733	26.969
Molecular Function	GO:0060589	4	nucleoside-triphosphatase regulator activity	0.0246135	Unigene6574_All	93 1130 Activator of 90 kDa heat shock protein ATPase-like protein 1 [Acromyrmex echinatior]	0.643	Down	0.00466	39.81
Molecular Function	GO:0003743	7	translation initiation factor activity	0.615229	Unigene10693_All	165 494 translation initiation factor 1 [Triatoma infestans]	0.764	Down	0.00977	12.402
Molecular Function	GO:0003743	7	translation initiation factor activity	0.615229	Unigene11967_All	94 1236 minus strand PREDICTED: eukaryotic translation initiation factor 3 subunit M-like [Bombus terrestris] >gi|350417143|ref|XP_003491277.1| PREDICTED: eukaryotic translation initiation factor 3 subunit M-like [Bombus impatiens]	0.747	Down	0.00132	43.3
Molecular Function	GO:0005549	3	odorant binding	0.119881	Unigene5485_All	308 631 odorant binding protein 14 [Adelphocoris lineolatus]	0.745	Down	0.0152	12.15
Molecular Function	GO:0005549	3	odorant binding	0.119881	Unigene17945_All	76 531 minus strand odorant-binding protein RproOBP2 precursor [Rhodnius prolixus]	0.800	Down	0.0272	17.08
Molecular Function	GO:0005549	3	odorant binding	0.119881	CL450.Contig3_All	43 450 odorant-binding protein 3 [Adelphocoris lineolatus]	0.757	Down	0.04	15.023
Molecular Function	GO:0016830	4	carbon-carbon lyase activity	0.596354	Unigene19067_All	83 1663 minus strand Sphingosine-1-phosphate lyase [Harpegnathos saltator]	0.735	Down	0.0242	59.033
Molecular Function	GO:0016830	4	carbon-carbon lyase activity	0.596354	Unigene14014_All	"90 1181 fructose 1,6-bisphosphate aldolase [Schistocerca gregaria]"	0.728	Down	0.00158	39.841
Molecular Function	GO:0035091	6	phosphatidylinositol binding	0.24869	CL95.Contig1_All	180 1958 PREDICTED: phosphatidylinositol-binding clathrin assembly protein LAP-like isoform 2 [Acyrthosiphon pisum]	0.748	Down	0.00132	63.929
Molecular Function	GO:0035091	6	phosphatidylinositol binding	0.24869	Unigene32260_All	150 1004 PREDICTED: similar to golgi phosphoprotein 3 (coat-protein GPP34) [Tribolium castaneum]	0.801	Down	0.00569	32.615
Molecular Function	GO:0070001	6	aspartic-type peptidase activity	4.26419e-05	Unigene7919_All	65 1111 minus strand PREDICTED: similar to cathepsin D isoform 1 [Tribolium castaneum]	0.462	Down	0.0203	38.522
Molecular Function	GO:0070001	6	aspartic-type peptidase activity	4.26419e-05	CL1726.Contig2_All	80 1168 PREDICTED: similar to cathepsin D isoform 1 [Tribolium castaneum]	0.333	Down	0.00211	40.422
Molecular Function	GO:0070001	6	aspartic-type peptidase activity	4.26419e-05	Unigene3551_All	221 1162 PREDICTED: cathepsin D-like [Oreochromis niloticus]	0.724	Down	0.0187	35.564
Molecular Function	GO:0070001	6	aspartic-type peptidase activity	4.26419e-05	Unigene17100_All	38 1192 signal peptide peptidase [Culex quinquefasciatus] >gi|167881598|gb|EDS44981.1| signal peptide peptidase [Culex quinquefasciatus]	0.782	Down	0.00989	42.778
Molecular Function	GO:0070001	6	aspartic-type peptidase activity	4.26419e-05	Unigene14022_All	40 1200 minus strand PREDICTED: lysosomal aspartic protease [Apis mellifera]	0.598	Down	0.0298	42.106
Molecular Function	GO:0070001	6	aspartic-type peptidase activity	4.26419e-05	Unigene3569_All	25 1173 minus strand aspartyl protease [Triatoma infestans]	0.700	Down	0.000384	42.503
Molecular Function	GO:0030234	3	enzyme regulator activity	0.000117317	Unigene40526_All	13 234 minus strand pacifastin [Eriocheir sinensis]	0.167	Down	0.0322	8.0454
Molecular Function	GO:0030234	3	enzyme regulator activity	0.000117317	Unigene7767_All	158 1099 minus strand PREDICTED: similar to arf gtpase-activating protein [Tribolium castaneum]	0.701	Down	0.0202	34.952
Molecular Function	GO:0030234	3	enzyme regulator activity	0.000117317	Unigene6574_All	93 1130 Activator of 90 kDa heat shock protein ATPase-like protein 1 [Acromyrmex echinatior]	0.643	Down	0.00466	39.81
Molecular Function	GO:0030234	3	enzyme regulator activity	0.000117317	CL2155.Contig1_All	347 967 PREDICTED: similar to cathepsin F-like cysteine protease [Tribolium castaneum]	0.391	Down	0.00103	23.428
Molecular Function	GO:0030234	3	enzyme regulator activity	0.000117317	Unigene20247_All	240 2204 PREDICTED: similar to f-spondin [Tribolium castaneum]	0.768	Down	0.0393	73.877
Molecular Function	GO:0030234	3	enzyme regulator activity	0.000117317	Unigene38038_All	146 481 pacifastin light chain precursor [Pacifastacus leniusculus]	0.175	Down	0.0372	12.293
Molecular Function	GO:0030234	3	enzyme regulator activity	0.000117317	CL4701.Contig1_All	46 1653 ADP-ribosylation factor GTPase activating protein 2 [Acyrthosiphon pisum]	0.768	Down	0.00599	60.09
Molecular Function	GO:0030234	3	enzyme regulator activity	0.000117317	Unigene7889_All	"121 831 minus strand PREDICTED: grpE protein homolog 1, mitochondrial-like [Nasonia vitripennis]"	0.826	Down	0.00733	26.969
Molecular Function	GO:0030234	3	enzyme regulator activity	0.000117317	Unigene11833_All	106 495 minus strand cathepsin F-like cysteine protease [Plautia stali]	0.782	Down	0.00641	14.535
Molecular Function	GO:0030234	3	enzyme regulator activity	0.000117317	CL33.Contig1_All	63 1043 minus strand cathepsin F-like cysteine protease [Plautia stali]	0.249	Down	0.00212	37.184
Molecular Function	GO:0005543	5	phospholipid binding	0.487256	CL95.Contig1_All	180 1958 PREDICTED: phosphatidylinositol-binding clathrin assembly protein LAP-like isoform 2 [Acyrthosiphon pisum]	0.748	Down	0.00132	63.929
Molecular Function	GO:0005543	5	phospholipid binding	0.487256	Unigene32260_All	150 1004 PREDICTED: similar to golgi phosphoprotein 3 (coat-protein GPP34) [Tribolium castaneum]	0.801	Down	0.00569	32.615
Molecular Function	GO:0051082	4	unfolded protein binding	0.359827	Unigene1531_All	2 1027 minus strand heat shock protein 90 [Gryllus firmus]	0.296	Down	0.003	40.54
Molecular Function	GO:0051082	4	unfolded protein binding	0.359827	CL331.Contig1_All	128 2281 minus strand heat shock protein 90 [Gryllus firmus]	0.805	Down	0.00374	82.6
Molecular Function	GO:0051082	4	unfolded protein binding	0.359827	Unigene9891_All	106 2436 endoplasmin [Locusta migratoria]	0.677	Down	0.00503	88.485
Molecular Function	GO:0005198	2	structural molecule activity	1.62047e-06	CL3443.Contig1_All	30 434 PREDICTED: similar to Larval cuticle protein A3A (TM-A3A) (TM-LCP A3A) [Tribolium castaneum]	0.325	Down	0.00177	14.135
Molecular Function	GO:0005198	2	structural molecule activity	1.62047e-06	CL3443.Contig2_All	16 342 cuticular protein CPR71B [Danaus plexippus]	0.312	Down	0.00741	11.316
Molecular Function	GO:0005198	2	structural molecule activity	1.62047e-06	Unigene37139_All	1 330 ribosomal protein L17 [Heliconius melpomene cythera]	0.355	Down	0.0289	12.657
Molecular Function	GO:0005198	2	structural molecule activity	1.62047e-06	Unigene10931_All	41 409 AGAP006864-PA [Anopheles gambiae str. PEST] >gi|55245971|gb|EAA45480.2| AGAP006864-PA [Anopheles gambiae str. PEST]	0.446	Down	0.0309	14.067
Molecular Function	GO:0005198	2	structural molecule activity	1.62047e-06	Unigene5823_All	93 824 minus strand AGAP006261-PA [Anopheles gambiae str. PEST] >gi|157016133|gb|EAL40041.3| AGAP006261-PA [Anopheles gambiae str. PEST]	0.665	Down	0.0124	27.24
Molecular Function	GO:0005198	2	structural molecule activity	1.62047e-06	CL1552.Contig1_All	73 567 PREDICTED: similar to Larval cuticle protein A3A (TM-A3A) (TM-LCP A3A) [Tribolium castaneum]	0.695	Down	0.00382	17.083
Molecular Function	GO:0005198	2	structural molecule activity	1.62047e-06	Unigene17155_All	1 276 minus strand cuticle protein-like protein [Triatoma matogrossensis]	0.652	Down	0.0437	9.7704
Molecular Function	GO:0005198	2	structural molecule activity	1.62047e-06	CL2908.Contig1_All	107 484 cuticular protein 58 precursor [Acyrthosiphon pisum] >gi|239792554|dbj|BAH72607.1| ACYPI003073 [Acyrthosiphon pisum]	0.706	Down	0.0461	13.942
Molecular Function	GO:0005198	2	structural molecule activity	1.62047e-06	CL2767.Contig2_All	108 479 minus strand ribosomal protein S12 [Manduca sexta]	0.786	Down	0.007	13.62
Molecular Function	GO:0005198	2	structural molecule activity	1.62047e-06	Unigene10803_All	83 427 cuticle protein 34 [Anopheles gambiae] >gi|162532640|gb|ABY16724.1| cuticle protein 34 [Anopheles gambiae]	0.546	Down	0.0134	12.951
Molecular Function	GO:0005198	2	structural molecule activity	1.62047e-06	Unigene13832_All	36 632 minus strand PREDICTED: similar to ribosomal protein L19e [Tribolium castaneum]	0.707	Down	0.00691	23.655
Molecular Function	GO:0005198	2	structural molecule activity	1.62047e-06	Unigene13867_All	66 674 minus strand PREDICTED: 60S ribosomal protein L13a-like [Bombus impatiens]	0.767	Down	0.0117	23.136
Molecular Function	GO:0005198	2	structural molecule activity	1.62047e-06	Unigene36112_All	2 256 minus strand ribosomal protein L13A [Antheraea yamamai]	0.160	Down	0.0165	9.8055
Molecular Function	GO:0005198	2	structural molecule activity	1.62047e-06	Unigene310_All	30 401 cuticular protein RR-2 motif 79 [Danaus plexippus]	0.441	Down	0.000205	13.412
Molecular Function	GO:0005198	2	structural molecule activity	1.62047e-06	Unigene18301_All	8 940 GK21628 [Drosophila willistoni] >gi|194159066|gb|EDW73967.1| GK21628 [Drosophila willistoni]	0.602	Down	0.0333	29.651
Molecular Function	GO:0005198	2	structural molecule activity	1.62047e-06	CL2553.Contig2_All	34 492 minus strand PREDICTED: similar to Larval cuticle protein A3A (TM-A3A) (TM-LCP A3A) [Tribolium castaneum]	0.768	Down	0.0494	15.739
Molecular Function	GO:0005198	2	structural molecule activity	1.62047e-06	Unigene20546_All	2 244 minus strand cuticle protein-like protein [Triatoma matogrossensis]	0.514	Down	0.00927	8.0703
Molecular Function	GO:0005198	2	structural molecule activity	1.62047e-06	Unigene17279_All	85 258 minus strand 40S ribosomal protein S14 [Rhodnius prolixus]	0.710	Down	0.0144	6.314
Molecular Function	GO:0005198	2	structural molecule activity	1.62047e-06	CL2553.Contig1_All	1 522 PREDICTED: cuticle protein-like [Bombus terrestris]	0.569	Down	0.00149	17.757
Molecular Function	GO:0005198	2	structural molecule activity	1.62047e-06	Unigene6180_All	66 413 minus strand 60S ribosomal protein L34 [Acromyrmex echinatior]	0.630	Down	0.0198	13.788
Molecular Function	GO:0005198	2	structural molecule activity	1.62047e-06	Unigene10402_All	25 444 cuticle protein-like protein [Triatoma matogrossensis]	0.312	Down	0.000879	14.391
Molecular Function	GO:0005198	2	structural molecule activity	1.62047e-06	Unigene20694_All	74 442 ribosomal protein L35 [Chrysomela tremula]	0.506	Down	0.0415	14.381
Molecular Function	GO:0005198	2	structural molecule activity	1.62047e-06	CL5055.Contig1_All	41 409 AGAP006864-PA [Anopheles gambiae str. PEST] >gi|55245971|gb|EAA45480.2| AGAP006864-PA [Anopheles gambiae str. PEST]	0.409	Down	0.0319	14.051
Molecular Function	GO:0005198	2	structural molecule activity	1.62047e-06	Unigene11792_All	70 702 minus strand 60S ribosomal protein L15 [Harpegnathos saltator]	0.714	Down	0.0319	24.846
Molecular Function	GO:0005198	2	structural molecule activity	1.62047e-06	CL2549.Contig1_All	63 569 minus strand cuticular protein CPR67A [Papilio xuthus]	0.602	Down	0.0434	17.509
Molecular Function	GO:0005198	2	structural molecule activity	1.62047e-06	Unigene42637_All	1 393 S3a protein [Antheraea pernyi]	0.186	Down	0.00546	15.208
Molecular Function	GO:0005198	2	structural molecule activity	1.62047e-06	Unigene7603_All	48 788 minus strand 40S ribosomal protein S6 [Acromyrmex echinatior]	0.820	Down	0.0199	28.505
Molecular Function	GO:0005198	2	structural molecule activity	1.62047e-06	CL881.Contig1_All	53 631 PREDICTED: similar to Larval cuticle protein A3A (TM-A3A) (TM-LCP A3A) [Tribolium castaneum]	0.716	Down	0.0153	19.25
Molecular Function	GO:0005198	2	structural molecule activity	1.62047e-06	CL1551.Contig2_All	79 903 minus strand PREDICTED: similar to ribosomal protein S2 [Tribolium castaneum]	0.823	Down	0.0049	29.45
Molecular Function	GO:0005096	6	GTPase activator activity	0.31707	CL4701.Contig1_All	46 1653 ADP-ribosylation factor GTPase activating protein 2 [Acyrthosiphon pisum]	0.768	Down	0.00599	60.09
Molecular Function	GO:0005096	6	GTPase activator activity	0.31707	Unigene7767_All	158 1099 minus strand PREDICTED: similar to arf gtpase-activating protein [Tribolium castaneum]	0.701	Down	0.0202	34.952
Molecular Function	GO:0004568	6	chitinase activity	0.119881	Unigene9901_All	178 1401 minus strand imaginal disk growth factor precursor [Acyrthosiphon pisum]	0.692	Down	0.0211	45.565
Molecular Function	GO:0004568	6	chitinase activity	0.119881	CL3932.Contig1_All	105 1331 imaginal disc growth factor [Bombus ignitus]	0.702	Down	0.0136	45.732
Molecular Function	GO:0004568	6	chitinase activity	0.119881	Unigene7845_All	85 1362 imaginal disc growth factor-like protein [Mamestra brassicae]	0.670	Down	0.000776	47.474
Molecular Function	GO:0004857	4	enzyme inhibitor activity	0.0022677	Unigene40526_All	13 234 minus strand pacifastin [Eriocheir sinensis]	0.167	Down	0.0322	8.0454
Molecular Function	GO:0004857	4	enzyme inhibitor activity	0.0022677	Unigene38038_All	146 481 pacifastin light chain precursor [Pacifastacus leniusculus]	0.175	Down	0.0372	12.293
Molecular Function	GO:0004857	4	enzyme inhibitor activity	0.0022677	CL2155.Contig1_All	347 967 PREDICTED: similar to cathepsin F-like cysteine protease [Tribolium castaneum]	0.391	Down	0.00103	23.428
Molecular Function	GO:0004857	4	enzyme inhibitor activity	0.0022677	CL33.Contig1_All	63 1043 minus strand cathepsin F-like cysteine protease [Plautia stali]	0.249	Down	0.00212	37.184
Molecular Function	GO:0004857	4	enzyme inhibitor activity	0.0022677	Unigene11833_All	106 495 minus strand cathepsin F-like cysteine protease [Plautia stali]	0.782	Down	0.00641	14.535
Molecular Function	GO:0004857	4	enzyme inhibitor activity	0.0022677	Unigene20247_All	240 2204 PREDICTED: similar to f-spondin [Tribolium castaneum]	0.768	Down	0.0393	73.877
Molecular Function	GO:0004869	7	cysteine-type endopeptidase inhibitor activity	0.038689	CL2155.Contig1_All	347 967 PREDICTED: similar to cathepsin F-like cysteine protease [Tribolium castaneum]	0.391	Down	0.00103	23.428
Molecular Function	GO:0004869	7	cysteine-type endopeptidase inhibitor activity	0.038689	CL33.Contig1_All	63 1043 minus strand cathepsin F-like cysteine protease [Plautia stali]	0.249	Down	0.00212	37.184
Molecular Function	GO:0004869	7	cysteine-type endopeptidase inhibitor activity	0.038689	Unigene11833_All	106 495 minus strand cathepsin F-like cysteine protease [Plautia stali]	0.782	Down	0.00641	14.535
Molecular Function	GO:0016835	4	carbon-oxygen lyase activity	0.5558	Unigene18080_All	164 469 minus strand PREDICTED: similar to pterin-4a-carbinolamine dehydratase CG1963-PA [Tribolium castaneum]	0.833	Down	0.0221	11.702
Molecular Function	GO:0016835	4	carbon-oxygen lyase activity	0.5558	Unigene1556_All	30 827 minus strand ACYPI002405 [Acyrthosiphon pisum]	0.782	Down	0.0201	29.994
Molecular Function	GO:0016714	5	oxidoreductase activity, acting on paired donors, with incorporation or reduction of molecular oxygen, reduced pteridine as one donor, and incorporation of one atom of oxygen	0.0908599	Unigene18170_All	71 1378 phenylalanine-tryptophan hydroxylase [Gryllus bimaculatus]	0.623	Down	0.0499	49.963
Molecular Function	GO:0016714	5	oxidoreductase activity, acting on paired donors, with incorporation or reduction of molecular oxygen, reduced pteridine as one donor, and incorporation of one atom of oxygen	0.0908599	Unigene14051_All	191 1885 minus strand AGAP006023-PA [Anopheles gambiae str. PEST] >gi|157015912|gb|EAA44132.3| AGAP006023-PA [Anopheles gambiae str. PEST]	0.400	Down	0.0399	64.477
Molecular Function	GO:0030414	5	peptidase inhibitor activity	0.00139759	Unigene40526_All	13 234 minus strand pacifastin [Eriocheir sinensis]	0.167	Down	0.0322	8.0454
Molecular Function	GO:0030414	5	peptidase inhibitor activity	0.00139759	Unigene38038_All	146 481 pacifastin light chain precursor [Pacifastacus leniusculus]	0.175	Down	0.0372	12.293
Molecular Function	GO:0030414	5	peptidase inhibitor activity	0.00139759	CL2155.Contig1_All	347 967 PREDICTED: similar to cathepsin F-like cysteine protease [Tribolium castaneum]	0.391	Down	0.00103	23.428
Molecular Function	GO:0030414	5	peptidase inhibitor activity	0.00139759	CL33.Contig1_All	63 1043 minus strand cathepsin F-like cysteine protease [Plautia stali]	0.249	Down	0.00212	37.184
Molecular Function	GO:0030414	5	peptidase inhibitor activity	0.00139759	Unigene11833_All	106 495 minus strand cathepsin F-like cysteine protease [Plautia stali]	0.782	Down	0.00641	14.535
Molecular Function	GO:0030414	5	peptidase inhibitor activity	0.00139759	Unigene20247_All	240 2204 PREDICTED: similar to f-spondin [Tribolium castaneum]	0.768	Down	0.0393	73.877
Molecular Function	GO:0008289	3	lipid binding	0.0795344	Unigene6577_All	206 781 JR-1 [Riptortus clavatus]	0.805	Down	0.0043	21.332
Molecular Function	GO:0008289	3	lipid binding	0.0795344	CL95.Contig1_All	180 1958 PREDICTED: phosphatidylinositol-binding clathrin assembly protein LAP-like isoform 2 [Acyrthosiphon pisum]	0.748	Down	0.00132	63.929
Molecular Function	GO:0008289	3	lipid binding	0.0795344	Unigene37158_All	"1 390 Chain A, Nmr Structure Of An Exchangeable Apolipoprotein-Manduca Sexta Apolipophorin-Iii"	0.320	Down	0.0468	14.639
Molecular Function	GO:0008289	3	lipid binding	0.0795344	Unigene32260_All	150 1004 PREDICTED: similar to golgi phosphoprotein 3 (coat-protein GPP34) [Tribolium castaneum]	0.801	Down	0.00569	32.615
Molecular Function	GO:0008047	4	enzyme activator activity	0.0897512	CL4701.Contig1_All	46 1653 ADP-ribosylation factor GTPase activating protein 2 [Acyrthosiphon pisum]	0.768	Down	0.00599	60.09
Molecular Function	GO:0008047	4	enzyme activator activity	0.0897512	Unigene7767_All	158 1099 minus strand PREDICTED: similar to arf gtpase-activating protein [Tribolium castaneum]	0.701	Down	0.0202	34.952
Molecular Function	GO:0008047	4	enzyme activator activity	0.0897512	Unigene6574_All	93 1130 Activator of 90 kDa heat shock protein ATPase-like protein 1 [Acromyrmex echinatior]	0.643	Down	0.00466	39.81
Molecular Function	GO:0004866	6	endopeptidase inhibitor activity	0.0246135	CL2155.Contig1_All	347 967 PREDICTED: similar to cathepsin F-like cysteine protease [Tribolium castaneum]	0.391	Down	0.00103	23.428
Molecular Function	GO:0004866	6	endopeptidase inhibitor activity	0.0246135	CL33.Contig1_All	63 1043 minus strand cathepsin F-like cysteine protease [Plautia stali]	0.249	Down	0.00212	37.184
Molecular Function	GO:0004866	6	endopeptidase inhibitor activity	0.0246135	Unigene11833_All	106 495 minus strand cathepsin F-like cysteine protease [Plautia stali]	0.782	Down	0.00641	14.535
Molecular Function	GO:0004866	6	endopeptidase inhibitor activity	0.0246135	Unigene20247_All	240 2204 PREDICTED: similar to f-spondin [Tribolium castaneum]	0.768	Down	0.0393	73.877
Molecular Function	GO:0060590	5	ATPase regulator activity	0.133164	Unigene7889_All	"121 831 minus strand PREDICTED: grpE protein homolog 1, mitochondrial-like [Nasonia vitripennis]"	0.826	Down	0.00733	26.969
Molecular Function	GO:0060590	5	ATPase regulator activity	0.133164	Unigene6574_All	93 1130 Activator of 90 kDa heat shock protein ATPase-like protein 1 [Acromyrmex echinatior]	0.643	Down	0.00466	39.81
Molecular Function	GO:0019899	4	enzyme binding	0.596354	Unigene14734_All	85 3276 minus strand Exportin-1 [Acromyrmex echinatior]	0.803	Down	0.00115	122.47
Molecular Function	GO:0019899	4	enzyme binding	0.596354	Unigene9852_All	108 1172 Hsp90 co-chaperone Cdc37 [Camponotus floridanus]	0.700	Down	0.0172	41.6
Biological Process	GO:0042559	6	pteridine-containing compound biosynthetic process	0.206421	CL2035.Contig3_All	56 676 PREDICTED: probable saccharopine dehydrogenase-like isoform 1 [Apis mellifera]	0.532	Down	0.000159	23.532
Biological Process	GO:0042559	6	pteridine-containing compound biosynthetic process	0.206421	Unigene18080_All	164 469 minus strand PREDICTED: similar to pterin-4a-carbinolamine dehydratase CG1963-PA [Tribolium castaneum]	0.833	Down	0.0221	11.702
Biological Process	GO:0070972	7	protein localization to endoplasmic reticulum	0.0472987	CL3526.Contig1_All	118 1629 minus strand PREDICTED: similar to AGAP004610-PA [Tribolium castaneum]	0.759	Down	0.0366	55.407
Biological Process	GO:0070972	7	protein localization to endoplasmic reticulum	0.0472987	Unigene18189_All	95 1948 PREDICTED: signal recognition particle receptor subunit alpha homolog isoform 2 [Nasonia vitripennis]	0.757	Down	0.0112	68.989
Biological Process	GO:0070972	7	protein localization to endoplasmic reticulum	0.0472987	Unigene4339_All	229 2178 signal recognition particle [Aedes aegypti] >gi|108881114|gb|EAT45339.1| signal recognition particle [Aedes aegypti]	0.797	Down	0.0344	73.405
Biological Process	GO:0046348	6	amino sugar catabolic process	0.11392	Unigene9901_All	178 1401 minus strand imaginal disk growth factor precursor [Acyrthosiphon pisum]	0.692	Down	0.0211	45.565
Biological Process	GO:0046348	6	amino sugar catabolic process	0.11392	CL3932.Contig1_All	105 1331 imaginal disc growth factor [Bombus ignitus]	0.702	Down	0.0136	45.732
Biological Process	GO:0046348	6	amino sugar catabolic process	0.11392	Unigene7845_All	85 1362 imaginal disc growth factor-like protein [Mamestra brassicae]	0.670	Down	0.000776	47.474
Biological Process	GO:0009108	6	coenzyme biosynthetic process	0.714893	CL2035.Contig3_All	56 676 PREDICTED: probable saccharopine dehydrogenase-like isoform 1 [Apis mellifera]	0.532	Down	0.000159	23.532
Biological Process	GO:0009108	6	coenzyme biosynthetic process	0.714893	Unigene18080_All	164 469 minus strand PREDICTED: similar to pterin-4a-carbinolamine dehydratase CG1963-PA [Tribolium castaneum]	0.833	Down	0.0221	11.702
Biological Process	GO:0045047	9	protein targeting to ER	0.0365336	CL3526.Contig1_All	118 1629 minus strand PREDICTED: similar to AGAP004610-PA [Tribolium castaneum]	0.759	Down	0.0366	55.407
Biological Process	GO:0045047	9	protein targeting to ER	0.0365336	Unigene18189_All	95 1948 PREDICTED: signal recognition particle receptor subunit alpha homolog isoform 2 [Nasonia vitripennis]	0.757	Down	0.0112	68.989
Biological Process	GO:0045047	9	protein targeting to ER	0.0365336	Unigene4339_All	229 2178 signal recognition particle [Aedes aegypti] >gi|108881114|gb|EAT45339.1| signal recognition particle [Aedes aegypti]	0.797	Down	0.0344	73.405
Biological Process	GO:0005975	4	carbohydrate metabolic process	0.205082	Unigene9901_All	178 1401 minus strand imaginal disk growth factor precursor [Acyrthosiphon pisum]	0.692	Down	0.0211	45.565
Biological Process	GO:0005975	4	carbohydrate metabolic process	0.205082	CL3932.Contig1_All	105 1331 imaginal disc growth factor [Bombus ignitus]	0.702	Down	0.0136	45.732
Biological Process	GO:0005975	4	carbohydrate metabolic process	0.205082	Unigene7845_All	85 1362 imaginal disc growth factor-like protein [Mamestra brassicae]	0.670	Down	0.000776	47.474
Biological Process	GO:0005975	4	carbohydrate metabolic process	0.205082	Unigene14014_All	"90 1181 fructose 1,6-bisphosphate aldolase [Schistocerca gregaria]"	0.728	Down	0.00158	39.841
Biological Process	GO:0005975	4	carbohydrate metabolic process	0.205082	Unigene1519_All	"235 1605 minus strand RecName: Full=Myrosinase 1; AltName: Full=Beta-glucosidase 1; AltName: Full=Beta-thioglucosidase 1; AltName: Full=Beta-thioglucosidase glucohydrolase 1; AltName: Full=Sinigrinase 1; AltName: Full=Thioglucosidase 1 >gi|83753522|pdb|1WCG|A Chain A, Aphid Myrosinase >gi|83753523|pdb|1WCG|B Chain B, Aphid Myrosinase >gi|16564883|gb|AAL25999.1|AF203780_1 thioglucosidase [Brevico…	0.766	Down	0.0292	52.881
Biological Process	GO:0005975	4	carbohydrate metabolic process	0.205082	Unigene362_All	187 1836 minus strand beta-N-acetylglucosaminidase 1 precursor [Bombyx mori] >gi|139004970|dbj|BAF52531.1| beta-N-acetylglucosaminidase 1 [Bombyx mori]	0.815	Down	0.0496	62.77
Biological Process	GO:0005975	4	carbohydrate metabolic process	0.205082	CL4264.Contig3_All	71 2146 Glucosamine--fructose-6-phosphate aminotransferase [isomerizing] 2 [Harpegnathos saltator]	0.723	Down	0.013	77.776
Biological Process	GO:0005975	4	carbohydrate metabolic process	0.205082	Unigene14967_All	7 1080 minus strand N-acetylgalactosamine kinase [Salmo salar] >gi|209154184|gb|ACI33324.1| N-acetylgalactosamine kinase [Salmo salar] >gi|223648620|gb|ACN11068.1| N-acetylgalactosamine kinase [Salmo salar]	0.805	Down	0.0136	39.182
Biological Process	GO:0005975	4	carbohydrate metabolic process	0.205082	Unigene9907_All	58 1437 alpha-amylase [Blattella germanica]	0.575	Down	0.00474	51.817
Biological Process	GO:0006810	4	transport	0.0424226	CL1996.Contig1_All	189 872 minus strand PREDICTED: endoplasmic reticulum resident protein 29-like [Acyrthosiphon pisum]	0.681	Down	0.00195	25.827
Biological Process	GO:0006810	4	transport	0.0424226	Unigene8238_All	124 408 Sec61 protein translocation complex beta subunit [Triatoma infestans] >gi|344190604|gb|AEM97988.1| Sec61 protein translocation complex beta subunit [Dipetalogaster maximus]	0.645	Down	0.00377	10.073
Biological Process	GO:0006810	4	transport	0.0424226	Unigene4411_All	"134 1021 minus strand PREDICTED: similar to adp,atp carrier protein [Tribolium castaneum]"	0.307	Down	0.000254	33.253
Biological Process	GO:0006810	4	transport	0.0424226	Unigene4339_All	229 2178 signal recognition particle [Aedes aegypti] >gi|108881114|gb|EAT45339.1| signal recognition particle [Aedes aegypti]	0.797	Down	0.0344	73.405
Biological Process	GO:0006810	4	transport	0.0424226	Unigene18189_All	95 1948 PREDICTED: signal recognition particle receptor subunit alpha homolog isoform 2 [Nasonia vitripennis]	0.757	Down	0.0112	68.989
Biological Process	GO:0006810	4	transport	0.0424226	Unigene5795_All	74 652 minus strand transmembrane emp24 domain trafficking protein 2 [Triatoma matogrossensis]	0.720	Down	0.00897	21.809
Biological Process	GO:0006810	4	transport	0.0424226	Unigene32260_All	150 1004 PREDICTED: similar to golgi phosphoprotein 3 (coat-protein GPP34) [Tribolium castaneum]	0.801	Down	0.00569	32.615
Biological Process	GO:0006810	4	transport	0.0424226	Unigene3554_All	161 1300 PREDICTED: tumor susceptibility gene 101 protein-like [Bombus impatiens]	0.786	Down	0.00156	42.997
Biological Process	GO:0006810	4	transport	0.0424226	Unigene37158_All	"1 390 Chain A, Nmr Structure Of An Exchangeable Apolipoprotein-Manduca Sexta Apolipophorin-Iii"	0.320	Down	0.0468	14.639
Biological Process	GO:0006810	4	transport	0.0424226	Unigene10781_All	237 1721 PREDICTED: similar to rasputin CG9412-PB [Tribolium castaneum]	0.792	Down	0.0384	54.607
Biological Process	GO:0006810	4	transport	0.0424226	Unigene7790_All	3 1208 minus strand PREDICTED: ATP-binding cassette sub-family D member 2-like [Acyrthosiphon pisum]	0.737	Down	0.0117	44.528
Biological Process	GO:0006810	4	transport	0.0424226	Unigene7799_All	1 1275 Sec61 alpha 1 subunit [Acyrthosiphon pisum] >gi|52630957|gb|AAU84942.1| probable transport protein Sec61 alpha subunit [Toxoptera citricida]	0.694	Down	0.0115	46.164
Biological Process	GO:0006810	4	transport	0.0424226	Unigene15938_All	113 706 GJ14099 [Drosophila virilis] >gi|194155827|gb|EDW71011.1| GJ14099 [Drosophila virilis]	0.807	Down	0.00632	22.083
Biological Process	GO:0006810	4	transport	0.0424226	Unigene6584_All	149 787 PREDICTED: similar to snare protein sec22 [Tribolium castaneum]	0.709	Down	0.0296	24.654
Biological Process	GO:0006810	4	transport	0.0424226	Unigene10595_All	9 1373 minus strand sugar transporter 2 [Nilaparvata lugens]	0.756	Down	0.0173	49.419
Biological Process	GO:0006810	4	transport	0.0424226	Unigene17927_All	105 473 minus strand GF13376 [Drosophila ananassae] >gi|190621768|gb|EDV37292.1| GF13376 [Drosophila ananassae]	0.790	Down	0.0493	13.796
Biological Process	GO:0006810	4	transport	0.0424226	CL3526.Contig1_All	118 1629 minus strand PREDICTED: similar to AGAP004610-PA [Tribolium castaneum]	0.759	Down	0.0366	55.407
Biological Process	GO:0006810	4	transport	0.0424226	Unigene14734_All	85 3276 minus strand Exportin-1 [Acromyrmex echinatior]	0.803	Down	0.00115	122.47
Biological Process	GO:0006810	4	transport	0.0424226	Unigene4507_All	244 2160 minus strand PREDICTED: solute carrier organic anion transporter family member 5A1-like [Bombus terrestris]	0.685	Down	0.0141	70.739
Biological Process	GO:0006810	4	transport	0.0424226	CL198.Contig2_All	110 982 CRAL/TRIO domain-containing protein [Culex quinquefasciatus] >gi|167869862|gb|EDS33245.1| CRAL/TRIO domain-containing protein [Culex quinquefasciatus]	0.798	Down	0.0118	34.003
Biological Process	GO:0006810	4	transport	0.0424226	Unigene6577_All	206 781 JR-1 [Riptortus clavatus]	0.805	Down	0.0043	21.332
Biological Process	GO:1901072	7	glucosamine-containing compound catabolic process	0.11392	Unigene9901_All	178 1401 minus strand imaginal disk growth factor precursor [Acyrthosiphon pisum]	0.692	Down	0.0211	45.565
Biological Process	GO:1901072	7	glucosamine-containing compound catabolic process	0.11392	CL3932.Contig1_All	105 1331 imaginal disc growth factor [Bombus ignitus]	0.702	Down	0.0136	45.732
Biological Process	GO:1901072	7	glucosamine-containing compound catabolic process	0.11392	Unigene7845_All	85 1362 imaginal disc growth factor-like protein [Mamestra brassicae]	0.670	Down	0.000776	47.474
Biological Process	GO:0006614	11	SRP-dependent cotranslational protein targeting to membrane	0.0365336	CL3526.Contig1_All	118 1629 minus strand PREDICTED: similar to AGAP004610-PA [Tribolium castaneum]	0.759	Down	0.0366	55.407
Biological Process	GO:0006614	11	SRP-dependent cotranslational protein targeting to membrane	0.0365336	Unigene18189_All	95 1948 PREDICTED: signal recognition particle receptor subunit alpha homolog isoform 2 [Nasonia vitripennis]	0.757	Down	0.0112	68.989
Biological Process	GO:0006614	11	SRP-dependent cotranslational protein targeting to membrane	0.0365336	Unigene4339_All	229 2178 signal recognition particle [Aedes aegypti] >gi|108881114|gb|EAT45339.1| signal recognition particle [Aedes aegypti]	0.797	Down	0.0344	73.405
Biological Process	GO:1902580	4	single-organism cellular localization	0.160828	CL3526.Contig1_All	118 1629 minus strand PREDICTED: similar to AGAP004610-PA [Tribolium castaneum]	0.759	Down	0.0366	55.407
Biological Process	GO:1902580	4	single-organism cellular localization	0.160828	Unigene18189_All	95 1948 PREDICTED: signal recognition particle receptor subunit alpha homolog isoform 2 [Nasonia vitripennis]	0.757	Down	0.0112	68.989
Biological Process	GO:1902580	4	single-organism cellular localization	0.160828	Unigene4339_All	229 2178 signal recognition particle [Aedes aegypti] >gi|108881114|gb|EAT45339.1| signal recognition particle [Aedes aegypti]	0.797	Down	0.0344	73.405
Biological Process	GO:0090150	7	establishment of protein localization to membrane	0.0472987	CL3526.Contig1_All	118 1629 minus strand PREDICTED: similar to AGAP004610-PA [Tribolium castaneum]	0.759	Down	0.0366	55.407
Biological Process	GO:0090150	7	establishment of protein localization to membrane	0.0472987	Unigene18189_All	95 1948 PREDICTED: signal recognition particle receptor subunit alpha homolog isoform 2 [Nasonia vitripennis]	0.757	Down	0.0112	68.989
Biological Process	GO:0090150	7	establishment of protein localization to membrane	0.0472987	Unigene4339_All	229 2178 signal recognition particle [Aedes aegypti] >gi|108881114|gb|EAT45339.1| signal recognition particle [Aedes aegypti]	0.797	Down	0.0344	73.405
Biological Process	GO:0006950	3	response to stress	0.319351	Unigene1531_All	2 1027 minus strand heat shock protein 90 [Gryllus firmus]	0.296	Down	0.003	40.54
Biological Process	GO:0006950	3	response to stress	0.319351	Unigene6574_All	93 1130 Activator of 90 kDa heat shock protein ATPase-like protein 1 [Acromyrmex echinatior]	0.643	Down	0.00466	39.81
Biological Process	GO:0006950	3	response to stress	0.319351	CL331.Contig1_All	128 2281 minus strand heat shock protein 90 [Gryllus firmus]	0.805	Down	0.00374	82.6
Biological Process	GO:0006950	3	response to stress	0.319351	Unigene9891_All	106 2436 endoplasmin [Locusta migratoria]	0.677	Down	0.00503	88.485
Biological Process	GO:0010876	4	lipid localization	0.656299	Unigene6577_All	206 781 JR-1 [Riptortus clavatus]	0.805	Down	0.0043	21.332
Biological Process	GO:0010876	4	lipid localization	0.656299	Unigene37158_All	"1 390 Chain A, Nmr Structure Of An Exchangeable Apolipoprotein-Manduca Sexta Apolipophorin-Iii"	0.320	Down	0.0468	14.639
Biological Process	GO:0044283	5	small molecule biosynthetic process	0.504082	CL2035.Contig3_All	56 676 PREDICTED: probable saccharopine dehydrogenase-like isoform 1 [Apis mellifera]	0.532	Down	0.000159	23.532
Biological Process	GO:0044283	5	small molecule biosynthetic process	0.504082	Unigene13854_All	213 746 PREDICTED: pyridoxine/pyridoxamine 5'-phosphate oxidase-like [Acyrthosiphon pisum]	0.725	Down	0.00625	20.762
Biological Process	GO:0044283	5	small molecule biosynthetic process	0.504082	Unigene9670_All	100 642 minus strand GI23507 [Drosophila mojavensis] >gi|193915264|gb|EDW14131.1| GI23507 [Drosophila mojavensis]	0.746	Down	0.00259	20.452
Biological Process	GO:0072594	7	establishment of protein localization to organelle	0.227445	CL3526.Contig1_All	118 1629 minus strand PREDICTED: similar to AGAP004610-PA [Tribolium castaneum]	0.759	Down	0.0366	55.407
Biological Process	GO:0072594	7	establishment of protein localization to organelle	0.227445	Unigene18189_All	95 1948 PREDICTED: signal recognition particle receptor subunit alpha homolog isoform 2 [Nasonia vitripennis]	0.757	Down	0.0112	68.989
Biological Process	GO:0072594	7	establishment of protein localization to organelle	0.227445	Unigene4339_All	229 2178 signal recognition particle [Aedes aegypti] >gi|108881114|gb|EAT45339.1| signal recognition particle [Aedes aegypti]	0.797	Down	0.0344	73.405
Biological Process	GO:0016053	6	organic acid biosynthetic process	0.714893	CL2035.Contig3_All	56 676 PREDICTED: probable saccharopine dehydrogenase-like isoform 1 [Apis mellifera]	0.532	Down	0.000159	23.532
Biological Process	GO:0016053	6	organic acid biosynthetic process	0.714893	Unigene9670_All	100 642 minus strand GI23507 [Drosophila mojavensis] >gi|193915264|gb|EDW14131.1| GI23507 [Drosophila mojavensis]	0.746	Down	0.00259	20.452
Biological Process	GO:0016485	7	protein processing	0.0268778	Unigene20699_All	77 364 minus strand signal peptidase complex subunit 1-like protein [Triatoma matogrossensis]	0.733	Down	0.00649	11.27
Biological Process	GO:0016485	7	protein processing	0.0268778	Unigene20011_All	91 669 minus strand signal peptidase complex subunit SPC25 [Dipetalogaster maximus]	0.820	Down	0.0407	22.029
Biological Process	GO:0016485	7	protein processing	0.0268778	Unigene18871_All	110 670 minus strand signal peptidase 18 kDa subunit [Triatoma matogrossensis]	0.775	Down	0.00416	21.102
Biological Process	GO:0072524	5	pyridine-containing compound metabolic process	0.604669	Unigene13854_All	213 746 PREDICTED: pyridoxine/pyridoxamine 5'-phosphate oxidase-like [Acyrthosiphon pisum]	0.725	Down	0.00625	20.762
Biological Process	GO:0072524	5	pyridine-containing compound metabolic process	0.604669	Unigene14014_All	"90 1181 fructose 1,6-bisphosphate aldolase [Schistocerca gregaria]"	0.728	Down	0.00158	39.841
Biological Process	GO:0006612	9	protein targeting to membrane	0.0365336	CL3526.Contig1_All	118 1629 minus strand PREDICTED: similar to AGAP004610-PA [Tribolium castaneum]	0.759	Down	0.0366	55.407
Biological Process	GO:0006612	9	protein targeting to membrane	0.0365336	Unigene18189_All	95 1948 PREDICTED: signal recognition particle receptor subunit alpha homolog isoform 2 [Nasonia vitripennis]	0.757	Down	0.0112	68.989
Biological Process	GO:0006612	9	protein targeting to membrane	0.0365336	Unigene4339_All	229 2178 signal recognition particle [Aedes aegypti] >gi|108881114|gb|EAT45339.1| signal recognition particle [Aedes aegypti]	0.797	Down	0.0344	73.405
Biological Process	GO:0033036	3	macromolecule localization	0.0810387	CL1996.Contig1_All	189 872 minus strand PREDICTED: endoplasmic reticulum resident protein 29-like [Acyrthosiphon pisum]	0.681	Down	0.00195	25.827
Biological Process	GO:0033036	3	macromolecule localization	0.0810387	Unigene8238_All	124 408 Sec61 protein translocation complex beta subunit [Triatoma infestans] >gi|344190604|gb|AEM97988.1| Sec61 protein translocation complex beta subunit [Dipetalogaster maximus]	0.645	Down	0.00377	10.073
Biological Process	GO:0033036	3	macromolecule localization	0.0810387	Unigene7799_All	1 1275 Sec61 alpha 1 subunit [Acyrthosiphon pisum] >gi|52630957|gb|AAU84942.1| probable transport protein Sec61 alpha subunit [Toxoptera citricida]	0.694	Down	0.0115	46.164
Biological Process	GO:0033036	3	macromolecule localization	0.0810387	Unigene4339_All	229 2178 signal recognition particle [Aedes aegypti] >gi|108881114|gb|EAT45339.1| signal recognition particle [Aedes aegypti]	0.797	Down	0.0344	73.405
Biological Process	GO:0033036	3	macromolecule localization	0.0810387	CL3526.Contig1_All	118 1629 minus strand PREDICTED: similar to AGAP004610-PA [Tribolium castaneum]	0.759	Down	0.0366	55.407
Biological Process	GO:0033036	3	macromolecule localization	0.0810387	Unigene18189_All	95 1948 PREDICTED: signal recognition particle receptor subunit alpha homolog isoform 2 [Nasonia vitripennis]	0.757	Down	0.0112	68.989
Biological Process	GO:0033036	3	macromolecule localization	0.0810387	Unigene14734_All	85 3276 minus strand Exportin-1 [Acromyrmex echinatior]	0.803	Down	0.00115	122.47
Biological Process	GO:0033036	3	macromolecule localization	0.0810387	Unigene6577_All	206 781 JR-1 [Riptortus clavatus]	0.805	Down	0.0043	21.332
Biological Process	GO:0033036	3	macromolecule localization	0.0810387	Unigene3554_All	161 1300 PREDICTED: tumor susceptibility gene 101 protein-like [Bombus impatiens]	0.786	Down	0.00156	42.997
Biological Process	GO:0033036	3	macromolecule localization	0.0810387	Unigene37158_All	"1 390 Chain A, Nmr Structure Of An Exchangeable Apolipoprotein-Manduca Sexta Apolipophorin-Iii"	0.320	Down	0.0468	14.639
Biological Process	GO:0006030	7	chitin metabolic process	0.118341	CL5531.Contig2_All	236 904 minus strand AGAP010364-PA [Anopheles gambiae str. PEST] >gi|157018426|gb|EAA07155.4| AGAP010364-PA [Anopheles gambiae str. PEST]	0.692	Down	0.0262	24.826
Biological Process	GO:0006030	7	chitin metabolic process	0.118341	Unigene9901_All	178 1401 minus strand imaginal disk growth factor precursor [Acyrthosiphon pisum]	0.692	Down	0.0211	45.565
Biological Process	GO:0006030	7	chitin metabolic process	0.118341	CL3932.Contig1_All	105 1331 imaginal disc growth factor [Bombus ignitus]	0.702	Down	0.0136	45.732
Biological Process	GO:0006030	7	chitin metabolic process	0.118341	Unigene7845_All	85 1362 imaginal disc growth factor-like protein [Mamestra brassicae]	0.670	Down	0.000776	47.474
Biological Process	GO:0006030	7	chitin metabolic process	0.118341	Unigene1463_All	243 935 minus strand cuticular protein analogous to peritrophins 1-G precursor [Tribolium castaneum] >gi|268309012|gb|ACY95472.1| cuticular protein analogous to peritrophins 1-G [Tribolium castaneum]	0.807	Down	0.0275	27.34
Biological Process	GO:0043043	7	peptide biosynthetic process	0.0735388	Unigene10693_All	165 494 translation initiation factor 1 [Triatoma infestans]	0.764	Down	0.00977	12.402
Biological Process	GO:0043043	7	peptide biosynthetic process	0.0735388	Unigene6180_All	66 413 minus strand 60S ribosomal protein L34 [Acromyrmex echinatior]	0.630	Down	0.0198	13.788
Biological Process	GO:0043043	7	peptide biosynthetic process	0.0735388	Unigene20694_All	74 442 ribosomal protein L35 [Chrysomela tremula]	0.506	Down	0.0415	14.381
Biological Process	GO:0043043	7	peptide biosynthetic process	0.0735388	Unigene37139_All	1 330 ribosomal protein L17 [Heliconius melpomene cythera]	0.355	Down	0.0289	12.657
Biological Process	GO:0043043	7	peptide biosynthetic process	0.0735388	CL2767.Contig2_All	108 479 minus strand ribosomal protein S12 [Manduca sexta]	0.786	Down	0.007	13.62
Biological Process	GO:0043043	7	peptide biosynthetic process	0.0735388	Unigene11792_All	70 702 minus strand 60S ribosomal protein L15 [Harpegnathos saltator]	0.714	Down	0.0319	24.846
Biological Process	GO:0043043	7	peptide biosynthetic process	0.0735388	Unigene13832_All	36 632 minus strand PREDICTED: similar to ribosomal protein L19e [Tribolium castaneum]	0.707	Down	0.00691	23.655
Biological Process	GO:0043043	7	peptide biosynthetic process	0.0735388	Unigene13867_All	66 674 minus strand PREDICTED: 60S ribosomal protein L13a-like [Bombus impatiens]	0.767	Down	0.0117	23.136
Biological Process	GO:0043043	7	peptide biosynthetic process	0.0735388	Unigene42637_All	1 393 S3a protein [Antheraea pernyi]	0.186	Down	0.00546	15.208
Biological Process	GO:0043043	7	peptide biosynthetic process	0.0735388	Unigene7603_All	48 788 minus strand 40S ribosomal protein S6 [Acromyrmex echinatior]	0.820	Down	0.0199	28.505
Biological Process	GO:0043043	7	peptide biosynthetic process	0.0735388	Unigene36112_All	2 256 minus strand ribosomal protein L13A [Antheraea yamamai]	0.160	Down	0.0165	9.8055
Biological Process	GO:0043043	7	peptide biosynthetic process	0.0735388	CL1551.Contig2_All	79 903 minus strand PREDICTED: similar to ribosomal protein S2 [Tribolium castaneum]	0.823	Down	0.0049	29.45
Biological Process	GO:0043043	7	peptide biosynthetic process	0.0735388	CL4142.Contig2_All	457 1764 minus strand Eukaryotic peptide chain release factor subunit 1 [Acromyrmex echinatior]	0.732	Down	0.0094	49.047
Biological Process	GO:0043043	7	peptide biosynthetic process	0.0735388	Unigene17279_All	85 258 minus strand 40S ribosomal protein S14 [Rhodnius prolixus]	0.710	Down	0.0144	6.314
Biological Process	GO:1902582	6	single-organism intracellular transport	0.144798	CL3526.Contig1_All	118 1629 minus strand PREDICTED: similar to AGAP004610-PA [Tribolium castaneum]	0.759	Down	0.0366	55.407
Biological Process	GO:1902582	6	single-organism intracellular transport	0.144798	Unigene18189_All	95 1948 PREDICTED: signal recognition particle receptor subunit alpha homolog isoform 2 [Nasonia vitripennis]	0.757	Down	0.0112	68.989
Biological Process	GO:1902582	6	single-organism intracellular transport	0.144798	Unigene4339_All	229 2178 signal recognition particle [Aedes aegypti] >gi|108881114|gb|EAT45339.1| signal recognition particle [Aedes aegypti]	0.797	Down	0.0344	73.405
Biological Process	GO:0046394	8	carboxylic acid biosynthetic process	0.714893	CL2035.Contig3_All	56 676 PREDICTED: probable saccharopine dehydrogenase-like isoform 1 [Apis mellifera]	0.532	Down	0.000159	23.532
Biological Process	GO:0046394	8	carboxylic acid biosynthetic process	0.714893	Unigene9670_All	100 642 minus strand GI23507 [Drosophila mojavensis] >gi|193915264|gb|EDW14131.1| GI23507 [Drosophila mojavensis]	0.746	Down	0.00259	20.452
Biological Process	GO:1901071	6	glucosamine-containing compound metabolic process	0.126189	CL5531.Contig2_All	236 904 minus strand AGAP010364-PA [Anopheles gambiae str. PEST] >gi|157018426|gb|EAA07155.4| AGAP010364-PA [Anopheles gambiae str. PEST]	0.692	Down	0.0262	24.826
Biological Process	GO:1901071	6	glucosamine-containing compound metabolic process	0.126189	Unigene9901_All	178 1401 minus strand imaginal disk growth factor precursor [Acyrthosiphon pisum]	0.692	Down	0.0211	45.565
Biological Process	GO:1901071	6	glucosamine-containing compound metabolic process	0.126189	CL3932.Contig1_All	105 1331 imaginal disc growth factor [Bombus ignitus]	0.702	Down	0.0136	45.732
Biological Process	GO:1901071	6	glucosamine-containing compound metabolic process	0.126189	Unigene7845_All	85 1362 imaginal disc growth factor-like protein [Mamestra brassicae]	0.670	Down	0.000776	47.474
Biological Process	GO:1901071	6	glucosamine-containing compound metabolic process	0.126189	Unigene1463_All	243 935 minus strand cuticular protein analogous to peritrophins 1-G precursor [Tribolium castaneum] >gi|268309012|gb|ACY95472.1| cuticular protein analogous to peritrophins 1-G [Tribolium castaneum]	0.807	Down	0.0275	27.34
Biological Process	GO:0016043	3	cellular component organization	0.192388	CL3793.Contig4_All	103 708 minus strand HsjCib isoform1 [Hodotermopsis sjoestedti]	0.549	Down	0.0012	22.729
Biological Process	GO:0016043	3	cellular component organization	0.192388	CL3526.Contig1_All	118 1629 minus strand PREDICTED: similar to AGAP004610-PA [Tribolium castaneum]	0.759	Down	0.0366	55.407
Biological Process	GO:0016043	3	cellular component organization	0.192388	Unigene18189_All	95 1948 PREDICTED: signal recognition particle receptor subunit alpha homolog isoform 2 [Nasonia vitripennis]	0.757	Down	0.0112	68.989
Biological Process	GO:0016043	3	cellular component organization	0.192388	CL4142.Contig2_All	457 1764 minus strand Eukaryotic peptide chain release factor subunit 1 [Acromyrmex echinatior]	0.732	Down	0.0094	49.047
Biological Process	GO:0016043	3	cellular component organization	0.192388	Unigene25727_All	148 318 jagunal-like protein [Rhodnius prolixus]	0.625	Down	0.0195	6.4174
Biological Process	GO:0016043	3	cellular component organization	0.192388	Unigene4339_All	229 2178 signal recognition particle [Aedes aegypti] >gi|108881114|gb|EAT45339.1| signal recognition particle [Aedes aegypti]	0.797	Down	0.0344	73.405
Biological Process	GO:0016043	3	cellular component organization	0.192388	CL95.Contig1_All	180 1958 PREDICTED: phosphatidylinositol-binding clathrin assembly protein LAP-like isoform 2 [Acyrthosiphon pisum]	0.748	Down	0.00132	63.929
Biological Process	GO:0016043	3	cellular component organization	0.192388	Unigene439_All	161 3667 PREDICTED: structural maintenance of chromosomes protein 2-like [Bombus impatiens]	0.254	Down	0.0288	133.98
Biological Process	GO:1901566	5	organonitrogen compound biosynthetic process	0.0263432	Unigene14051_All	191 1885 minus strand AGAP006023-PA [Anopheles gambiae str. PEST] >gi|157015912|gb|EAA44132.3| AGAP006023-PA [Anopheles gambiae str. PEST]	0.400	Down	0.0399	64.477
Biological Process	GO:1901566	5	organonitrogen compound biosynthetic process	0.0263432	Unigene18080_All	164 469 minus strand PREDICTED: similar to pterin-4a-carbinolamine dehydratase CG1963-PA [Tribolium castaneum]	0.833	Down	0.0221	11.702
Biological Process	GO:1901566	5	organonitrogen compound biosynthetic process	0.0263432	Unigene37139_All	1 330 ribosomal protein L17 [Heliconius melpomene cythera]	0.355	Down	0.0289	12.657
Biological Process	GO:1901566	5	organonitrogen compound biosynthetic process	0.0263432	CL2767.Contig2_All	108 479 minus strand ribosomal protein S12 [Manduca sexta]	0.786	Down	0.007	13.62
Biological Process	GO:1901566	5	organonitrogen compound biosynthetic process	0.0263432	Unigene13832_All	36 632 minus strand PREDICTED: similar to ribosomal protein L19e [Tribolium castaneum]	0.707	Down	0.00691	23.655
Biological Process	GO:1901566	5	organonitrogen compound biosynthetic process	0.0263432	Unigene13867_All	66 674 minus strand PREDICTED: 60S ribosomal protein L13a-like [Bombus impatiens]	0.767	Down	0.0117	23.136
Biological Process	GO:1901566	5	organonitrogen compound biosynthetic process	0.0263432	Unigene13854_All	213 746 PREDICTED: pyridoxine/pyridoxamine 5'-phosphate oxidase-like [Acyrthosiphon pisum]	0.725	Down	0.00625	20.762
Biological Process	GO:1901566	5	organonitrogen compound biosynthetic process	0.0263432	Unigene36112_All	2 256 minus strand ribosomal protein L13A [Antheraea yamamai]	0.160	Down	0.0165	9.8055
Biological Process	GO:1901566	5	organonitrogen compound biosynthetic process	0.0263432	Unigene17279_All	85 258 minus strand 40S ribosomal protein S14 [Rhodnius prolixus]	0.710	Down	0.0144	6.314
Biological Process	GO:1901566	5	organonitrogen compound biosynthetic process	0.0263432	Unigene10693_All	165 494 translation initiation factor 1 [Triatoma infestans]	0.764	Down	0.00977	12.402
Biological Process	GO:1901566	5	organonitrogen compound biosynthetic process	0.0263432	Unigene6180_All	66 413 minus strand 60S ribosomal protein L34 [Acromyrmex echinatior]	0.630	Down	0.0198	13.788
Biological Process	GO:1901566	5	organonitrogen compound biosynthetic process	0.0263432	Unigene20694_All	74 442 ribosomal protein L35 [Chrysomela tremula]	0.506	Down	0.0415	14.381
Biological Process	GO:1901566	5	organonitrogen compound biosynthetic process	0.0263432	Unigene11792_All	70 702 minus strand 60S ribosomal protein L15 [Harpegnathos saltator]	0.714	Down	0.0319	24.846
Biological Process	GO:1901566	5	organonitrogen compound biosynthetic process	0.0263432	CL2905.Contig2_All	2 1228 PREDICTED: inosine-5'-monophosphate dehydrogenase isoform 1 [Apis mellifera]	0.757	Down	0.0147	44.004
Biological Process	GO:1901566	5	organonitrogen compound biosynthetic process	0.0263432	CL2035.Contig3_All	56 676 PREDICTED: probable saccharopine dehydrogenase-like isoform 1 [Apis mellifera]	0.532	Down	0.000159	23.532
Biological Process	GO:1901566	5	organonitrogen compound biosynthetic process	0.0263432	Unigene42637_All	1 393 S3a protein [Antheraea pernyi]	0.186	Down	0.00546	15.208
Biological Process	GO:1901566	5	organonitrogen compound biosynthetic process	0.0263432	Unigene7603_All	48 788 minus strand 40S ribosomal protein S6 [Acromyrmex echinatior]	0.820	Down	0.0199	28.505
Biological Process	GO:1901566	5	organonitrogen compound biosynthetic process	0.0263432	CL1551.Contig2_All	79 903 minus strand PREDICTED: similar to ribosomal protein S2 [Tribolium castaneum]	0.823	Down	0.0049	29.45
Biological Process	GO:1901566	5	organonitrogen compound biosynthetic process	0.0263432	CL4142.Contig2_All	457 1764 minus strand Eukaryotic peptide chain release factor subunit 1 [Acromyrmex echinatior]	0.732	Down	0.0094	49.047
Biological Process	GO:1901566	5	organonitrogen compound biosynthetic process	0.0263432	Unigene9670_All	100 642 minus strand GI23507 [Drosophila mojavensis] >gi|193915264|gb|EDW14131.1| GI23507 [Drosophila mojavensis]	0.746	Down	0.00259	20.452
Biological Process	GO:0044802	5	single-organism membrane organization	0.11392	CL3526.Contig1_All	118 1629 minus strand PREDICTED: similar to AGAP004610-PA [Tribolium castaneum]	0.759	Down	0.0366	55.407
Biological Process	GO:0044802	5	single-organism membrane organization	0.11392	Unigene18189_All	95 1948 PREDICTED: signal recognition particle receptor subunit alpha homolog isoform 2 [Nasonia vitripennis]	0.757	Down	0.0112	68.989
Biological Process	GO:0044802	5	single-organism membrane organization	0.11392	Unigene4339_All	229 2178 signal recognition particle [Aedes aegypti] >gi|108881114|gb|EAT45339.1| signal recognition particle [Aedes aegypti]	0.797	Down	0.0344	73.405
Biological Process	GO:0042558	5	pteridine-containing compound metabolic process	0.242329	CL2035.Contig3_All	56 676 PREDICTED: probable saccharopine dehydrogenase-like isoform 1 [Apis mellifera]	0.532	Down	0.000159	23.532
Biological Process	GO:0042558	5	pteridine-containing compound metabolic process	0.242329	Unigene18080_All	164 469 minus strand PREDICTED: similar to pterin-4a-carbinolamine dehydratase CG1963-PA [Tribolium castaneum]	0.833	Down	0.0221	11.702
Biological Process	GO:1901565	5	organonitrogen compound catabolic process	0.196146	Unigene18170_All	71 1378 phenylalanine-tryptophan hydroxylase [Gryllus bimaculatus]	0.623	Down	0.0499	49.963
Biological Process	GO:1901565	5	organonitrogen compound catabolic process	0.196146	Unigene9901_All	178 1401 minus strand imaginal disk growth factor precursor [Acyrthosiphon pisum]	0.692	Down	0.0211	45.565
Biological Process	GO:1901565	5	organonitrogen compound catabolic process	0.196146	CL3932.Contig1_All	105 1331 imaginal disc growth factor [Bombus ignitus]	0.702	Down	0.0136	45.732
Biological Process	GO:1901565	5	organonitrogen compound catabolic process	0.196146	Unigene7845_All	85 1362 imaginal disc growth factor-like protein [Mamestra brassicae]	0.670	Down	0.000776	47.474
Biological Process	GO:0006040	5	amino sugar metabolic process	0.126189	CL5531.Contig2_All	236 904 minus strand AGAP010364-PA [Anopheles gambiae str. PEST] >gi|157018426|gb|EAA07155.4| AGAP010364-PA [Anopheles gambiae str. PEST]	0.692	Down	0.0262	24.826
Biological Process	GO:0006040	5	amino sugar metabolic process	0.126189	Unigene9901_All	178 1401 minus strand imaginal disk growth factor precursor [Acyrthosiphon pisum]	0.692	Down	0.0211	45.565
Biological Process	GO:0006040	5	amino sugar metabolic process	0.126189	CL3932.Contig1_All	105 1331 imaginal disc growth factor [Bombus ignitus]	0.702	Down	0.0136	45.732
Biological Process	GO:0006040	5	amino sugar metabolic process	0.126189	Unigene7845_All	85 1362 imaginal disc growth factor-like protein [Mamestra brassicae]	0.670	Down	0.000776	47.474
Biological Process	GO:0006040	5	amino sugar metabolic process	0.126189	Unigene1463_All	243 935 minus strand cuticular protein analogous to peritrophins 1-G precursor [Tribolium castaneum] >gi|268309012|gb|ACY95472.1| cuticular protein analogous to peritrophins 1-G [Tribolium castaneum]	0.807	Down	0.0275	27.34
Biological Process	GO:0043604	6	amide biosynthetic process	0.0443636	Unigene10693_All	165 494 translation initiation factor 1 [Triatoma infestans]	0.764	Down	0.00977	12.402
Biological Process	GO:0043604	6	amide biosynthetic process	0.0443636	Unigene6180_All	66 413 minus strand 60S ribosomal protein L34 [Acromyrmex echinatior]	0.630	Down	0.0198	13.788
Biological Process	GO:0043604	6	amide biosynthetic process	0.0443636	Unigene20694_All	74 442 ribosomal protein L35 [Chrysomela tremula]	0.506	Down	0.0415	14.381
Biological Process	GO:0043604	6	amide biosynthetic process	0.0443636	Unigene37139_All	1 330 ribosomal protein L17 [Heliconius melpomene cythera]	0.355	Down	0.0289	12.657
Biological Process	GO:0043604	6	amide biosynthetic process	0.0443636	CL2767.Contig2_All	108 479 minus strand ribosomal protein S12 [Manduca sexta]	0.786	Down	0.007	13.62
Biological Process	GO:0043604	6	amide biosynthetic process	0.0443636	Unigene11792_All	70 702 minus strand 60S ribosomal protein L15 [Harpegnathos saltator]	0.714	Down	0.0319	24.846
Biological Process	GO:0043604	6	amide biosynthetic process	0.0443636	CL2035.Contig3_All	56 676 PREDICTED: probable saccharopine dehydrogenase-like isoform 1 [Apis mellifera]	0.532	Down	0.000159	23.532
Biological Process	GO:0043604	6	amide biosynthetic process	0.0443636	Unigene13832_All	36 632 minus strand PREDICTED: similar to ribosomal protein L19e [Tribolium castaneum]	0.707	Down	0.00691	23.655
Biological Process	GO:0043604	6	amide biosynthetic process	0.0443636	Unigene13867_All	66 674 minus strand PREDICTED: 60S ribosomal protein L13a-like [Bombus impatiens]	0.767	Down	0.0117	23.136
Biological Process	GO:0043604	6	amide biosynthetic process	0.0443636	Unigene42637_All	1 393 S3a protein [Antheraea pernyi]	0.186	Down	0.00546	15.208
Biological Process	GO:0043604	6	amide biosynthetic process	0.0443636	Unigene7603_All	48 788 minus strand 40S ribosomal protein S6 [Acromyrmex echinatior]	0.820	Down	0.0199	28.505
Biological Process	GO:0043604	6	amide biosynthetic process	0.0443636	Unigene36112_All	2 256 minus strand ribosomal protein L13A [Antheraea yamamai]	0.160	Down	0.0165	9.8055
Biological Process	GO:0043604	6	amide biosynthetic process	0.0443636	CL4142.Contig2_All	457 1764 minus strand Eukaryotic peptide chain release factor subunit 1 [Acromyrmex echinatior]	0.732	Down	0.0094	49.047
Biological Process	GO:0043604	6	amide biosynthetic process	0.0443636	CL1551.Contig2_All	79 903 minus strand PREDICTED: similar to ribosomal protein S2 [Tribolium castaneum]	0.823	Down	0.0049	29.45
Biological Process	GO:0043604	6	amide biosynthetic process	0.0443636	Unigene17279_All	85 258 minus strand 40S ribosomal protein S14 [Rhodnius prolixus]	0.710	Down	0.0144	6.314
Biological Process	GO:0006518	6	peptide metabolic process	0.012022	Unigene37139_All	1 330 ribosomal protein L17 [Heliconius melpomene cythera]	0.355	Down	0.0289	12.657
Biological Process	GO:0006518	6	peptide metabolic process	0.012022	CL2767.Contig2_All	108 479 minus strand ribosomal protein S12 [Manduca sexta]	0.786	Down	0.007	13.62
Biological Process	GO:0006518	6	peptide metabolic process	0.012022	Unigene18871_All	110 670 minus strand signal peptidase 18 kDa subunit [Triatoma matogrossensis]	0.775	Down	0.00416	21.102
Biological Process	GO:0006518	6	peptide metabolic process	0.012022	Unigene20699_All	77 364 minus strand signal peptidase complex subunit 1-like protein [Triatoma matogrossensis]	0.733	Down	0.00649	11.27
Biological Process	GO:0006518	6	peptide metabolic process	0.012022	Unigene13832_All	36 632 minus strand PREDICTED: similar to ribosomal protein L19e [Tribolium castaneum]	0.707	Down	0.00691	23.655
Biological Process	GO:0006518	6	peptide metabolic process	0.012022	Unigene13867_All	66 674 minus strand PREDICTED: 60S ribosomal protein L13a-like [Bombus impatiens]	0.767	Down	0.0117	23.136
Biological Process	GO:0006518	6	peptide metabolic process	0.012022	Unigene36112_All	2 256 minus strand ribosomal protein L13A [Antheraea yamamai]	0.160	Down	0.0165	9.8055
Biological Process	GO:0006518	6	peptide metabolic process	0.012022	Unigene17279_All	85 258 minus strand 40S ribosomal protein S14 [Rhodnius prolixus]	0.710	Down	0.0144	6.314
Biological Process	GO:0006518	6	peptide metabolic process	0.012022	Unigene10693_All	165 494 translation initiation factor 1 [Triatoma infestans]	0.764	Down	0.00977	12.402
Biological Process	GO:0006518	6	peptide metabolic process	0.012022	Unigene20011_All	91 669 minus strand signal peptidase complex subunit SPC25 [Dipetalogaster maximus]	0.820	Down	0.0407	22.029
Biological Process	GO:0006518	6	peptide metabolic process	0.012022	Unigene6180_All	66 413 minus strand 60S ribosomal protein L34 [Acromyrmex echinatior]	0.630	Down	0.0198	13.788
Biological Process	GO:0006518	6	peptide metabolic process	0.012022	Unigene20694_All	74 442 ribosomal protein L35 [Chrysomela tremula]	0.506	Down	0.0415	14.381
Biological Process	GO:0006518	6	peptide metabolic process	0.012022	Unigene11792_All	70 702 minus strand 60S ribosomal protein L15 [Harpegnathos saltator]	0.714	Down	0.0319	24.846
Biological Process	GO:0006518	6	peptide metabolic process	0.012022	Unigene7603_All	48 788 minus strand 40S ribosomal protein S6 [Acromyrmex echinatior]	0.820	Down	0.0199	28.505
Biological Process	GO:0006518	6	peptide metabolic process	0.012022	Unigene42637_All	1 393 S3a protein [Antheraea pernyi]	0.186	Down	0.00546	15.208
Biological Process	GO:0006518	6	peptide metabolic process	0.012022	CL1551.Contig2_All	79 903 minus strand PREDICTED: similar to ribosomal protein S2 [Tribolium castaneum]	0.823	Down	0.0049	29.45
Biological Process	GO:0006518	6	peptide metabolic process	0.012022	CL4142.Contig2_All	457 1764 minus strand Eukaryotic peptide chain release factor subunit 1 [Acromyrmex echinatior]	0.732	Down	0.0094	49.047
Biological Process	GO:0015031	6	protein transport	0.0942391	CL1996.Contig1_All	189 872 minus strand PREDICTED: endoplasmic reticulum resident protein 29-like [Acyrthosiphon pisum]	0.681	Down	0.00195	25.827
Biological Process	GO:0015031	6	protein transport	0.0942391	Unigene8238_All	124 408 Sec61 protein translocation complex beta subunit [Triatoma infestans] >gi|344190604|gb|AEM97988.1| Sec61 protein translocation complex beta subunit [Dipetalogaster maximus]	0.645	Down	0.00377	10.073
Biological Process	GO:0015031	6	protein transport	0.0942391	Unigene7799_All	1 1275 Sec61 alpha 1 subunit [Acyrthosiphon pisum] >gi|52630957|gb|AAU84942.1| probable transport protein Sec61 alpha subunit [Toxoptera citricida]	0.694	Down	0.0115	46.164
Biological Process	GO:0015031	6	protein transport	0.0942391	Unigene4339_All	229 2178 signal recognition particle [Aedes aegypti] >gi|108881114|gb|EAT45339.1| signal recognition particle [Aedes aegypti]	0.797	Down	0.0344	73.405
Biological Process	GO:0015031	6	protein transport	0.0942391	CL3526.Contig1_All	118 1629 minus strand PREDICTED: similar to AGAP004610-PA [Tribolium castaneum]	0.759	Down	0.0366	55.407
Biological Process	GO:0015031	6	protein transport	0.0942391	Unigene18189_All	95 1948 PREDICTED: signal recognition particle receptor subunit alpha homolog isoform 2 [Nasonia vitripennis]	0.757	Down	0.0112	68.989
Biological Process	GO:0015031	6	protein transport	0.0942391	Unigene14734_All	85 3276 minus strand Exportin-1 [Acromyrmex echinatior]	0.803	Down	0.00115	122.47
Biological Process	GO:0015031	6	protein transport	0.0942391	Unigene3554_All	161 1300 PREDICTED: tumor susceptibility gene 101 protein-like [Bombus impatiens]	0.786	Down	0.00156	42.997
Biological Process	GO:0033365	6	protein localization to organelle	0.244459	CL3526.Contig1_All	118 1629 minus strand PREDICTED: similar to AGAP004610-PA [Tribolium castaneum]	0.759	Down	0.0366	55.407
Biological Process	GO:0033365	6	protein localization to organelle	0.244459	Unigene18189_All	95 1948 PREDICTED: signal recognition particle receptor subunit alpha homolog isoform 2 [Nasonia vitripennis]	0.757	Down	0.0112	68.989
Biological Process	GO:0033365	6	protein localization to organelle	0.244459	Unigene4339_All	229 2178 signal recognition particle [Aedes aegypti] >gi|108881114|gb|EAT45339.1| signal recognition particle [Aedes aegypti]	0.797	Down	0.0344	73.405
Biological Process	GO:0008104	4	protein localization	0.117954	CL1996.Contig1_All	189 872 minus strand PREDICTED: endoplasmic reticulum resident protein 29-like [Acyrthosiphon pisum]	0.681	Down	0.00195	25.827
Biological Process	GO:0008104	4	protein localization	0.117954	Unigene8238_All	124 408 Sec61 protein translocation complex beta subunit [Triatoma infestans] >gi|344190604|gb|AEM97988.1| Sec61 protein translocation complex beta subunit [Dipetalogaster maximus]	0.645	Down	0.00377	10.073
Biological Process	GO:0008104	4	protein localization	0.117954	Unigene7799_All	1 1275 Sec61 alpha 1 subunit [Acyrthosiphon pisum] >gi|52630957|gb|AAU84942.1| probable transport protein Sec61 alpha subunit [Toxoptera citricida]	0.694	Down	0.0115	46.164
Biological Process	GO:0008104	4	protein localization	0.117954	Unigene4339_All	229 2178 signal recognition particle [Aedes aegypti] >gi|108881114|gb|EAT45339.1| signal recognition particle [Aedes aegypti]	0.797	Down	0.0344	73.405
Biological Process	GO:0008104	4	protein localization	0.117954	CL3526.Contig1_All	118 1629 minus strand PREDICTED: similar to AGAP004610-PA [Tribolium castaneum]	0.759	Down	0.0366	55.407
Biological Process	GO:0008104	4	protein localization	0.117954	Unigene18189_All	95 1948 PREDICTED: signal recognition particle receptor subunit alpha homolog isoform 2 [Nasonia vitripennis]	0.757	Down	0.0112	68.989
Biological Process	GO:0008104	4	protein localization	0.117954	Unigene14734_All	85 3276 minus strand Exportin-1 [Acromyrmex echinatior]	0.803	Down	0.00115	122.47
Biological Process	GO:0008104	4	protein localization	0.117954	Unigene3554_All	161 1300 PREDICTED: tumor susceptibility gene 101 protein-like [Bombus impatiens]	0.786	Down	0.00156	42.997
Biological Process	GO:0044765	5	single-organism transport	0.113785	Unigene17927_All	105 473 minus strand GF13376 [Drosophila ananassae] >gi|190621768|gb|EDV37292.1| GF13376 [Drosophila ananassae]	0.790	Down	0.0493	13.796
Biological Process	GO:0044765	5	single-organism transport	0.113785	CL1996.Contig1_All	189 872 minus strand PREDICTED: endoplasmic reticulum resident protein 29-like [Acyrthosiphon pisum]	0.681	Down	0.00195	25.827
Biological Process	GO:0044765	5	single-organism transport	0.113785	CL3526.Contig1_All	118 1629 minus strand PREDICTED: similar to AGAP004610-PA [Tribolium castaneum]	0.759	Down	0.0366	55.407
Biological Process	GO:0044765	5	single-organism transport	0.113785	Unigene18189_All	95 1948 PREDICTED: signal recognition particle receptor subunit alpha homolog isoform 2 [Nasonia vitripennis]	0.757	Down	0.0112	68.989
Biological Process	GO:0044765	5	single-organism transport	0.113785	Unigene6577_All	206 781 JR-1 [Riptortus clavatus]	0.805	Down	0.0043	21.332
Biological Process	GO:0044765	5	single-organism transport	0.113785	Unigene4339_All	229 2178 signal recognition particle [Aedes aegypti] >gi|108881114|gb|EAT45339.1| signal recognition particle [Aedes aegypti]	0.797	Down	0.0344	73.405
Biological Process	GO:0044765	5	single-organism transport	0.113785	Unigene37158_All	"1 390 Chain A, Nmr Structure Of An Exchangeable Apolipoprotein-Manduca Sexta Apolipophorin-Iii"	0.320	Down	0.0468	14.639
Biological Process	GO:0009072	9	aromatic amino acid family metabolic process	0.340682	Unigene18170_All	71 1378 phenylalanine-tryptophan hydroxylase [Gryllus bimaculatus]	0.623	Down	0.0499	49.963
Biological Process	GO:0009072	9	aromatic amino acid family metabolic process	0.340682	Unigene14051_All	191 1885 minus strand AGAP006023-PA [Anopheles gambiae str. PEST] >gi|157015912|gb|EAA44132.3| AGAP006023-PA [Anopheles gambiae str. PEST]	0.400	Down	0.0399	64.477
Biological Process	GO:0072599	8	establishment of protein localization to endoplasmic reticulum	0.0365336	CL3526.Contig1_All	118 1629 minus strand PREDICTED: similar to AGAP004610-PA [Tribolium castaneum]	0.759	Down	0.0366	55.407
Biological Process	GO:0072599	8	establishment of protein localization to endoplasmic reticulum	0.0365336	Unigene18189_All	95 1948 PREDICTED: signal recognition particle receptor subunit alpha homolog isoform 2 [Nasonia vitripennis]	0.757	Down	0.0112	68.989
Biological Process	GO:0072599	8	establishment of protein localization to endoplasmic reticulum	0.0365336	Unigene4339_All	229 2178 signal recognition particle [Aedes aegypti] >gi|108881114|gb|EAT45339.1| signal recognition particle [Aedes aegypti]	0.797	Down	0.0344	73.405
Biological Process	GO:0006869	6	lipid transport	0.62268	Unigene6577_All	206 781 JR-1 [Riptortus clavatus]	0.805	Down	0.0043	21.332
Biological Process	GO:0006869	6	lipid transport	0.62268	Unigene37158_All	"1 390 Chain A, Nmr Structure Of An Exchangeable Apolipoprotein-Manduca Sexta Apolipophorin-Iii"	0.320	Down	0.0468	14.639
Biological Process	GO:0072657	6	protein localization to membrane	0.0472987	CL3526.Contig1_All	118 1629 minus strand PREDICTED: similar to AGAP004610-PA [Tribolium castaneum]	0.759	Down	0.0366	55.407
Biological Process	GO:0072657	6	protein localization to membrane	0.0472987	Unigene18189_All	95 1948 PREDICTED: signal recognition particle receptor subunit alpha homolog isoform 2 [Nasonia vitripennis]	0.757	Down	0.0112	68.989
Biological Process	GO:0072657	6	protein localization to membrane	0.0472987	Unigene4339_All	229 2178 signal recognition particle [Aedes aegypti] >gi|108881114|gb|EAT45339.1| signal recognition particle [Aedes aegypti]	0.797	Down	0.0344	73.405
Biological Process	GO:1901617	5	organic hydroxy compound biosynthetic process	0.168828	Unigene14051_All	191 1885 minus strand AGAP006023-PA [Anopheles gambiae str. PEST] >gi|157015912|gb|EAA44132.3| AGAP006023-PA [Anopheles gambiae str. PEST]	0.400	Down	0.0399	64.477
Biological Process	GO:1901617	5	organic hydroxy compound biosynthetic process	0.168828	Unigene13854_All	213 746 PREDICTED: pyridoxine/pyridoxamine 5'-phosphate oxidase-like [Acyrthosiphon pisum]	0.725	Down	0.00625	20.762
Biological Process	GO:1901615	4	organic hydroxy compound metabolic process	0.370569	Unigene14051_All	191 1885 minus strand AGAP006023-PA [Anopheles gambiae str. PEST] >gi|157015912|gb|EAA44132.3| AGAP006023-PA [Anopheles gambiae str. PEST]	0.400	Down	0.0399	64.477
Biological Process	GO:1901615	4	organic hydroxy compound metabolic process	0.370569	Unigene13854_All	213 746 PREDICTED: pyridoxine/pyridoxamine 5'-phosphate oxidase-like [Acyrthosiphon pisum]	0.725	Down	0.00625	20.762
Biological Process	GO:1902578	3	single-organism localization	0.143069	Unigene17927_All	105 473 minus strand GF13376 [Drosophila ananassae] >gi|190621768|gb|EDV37292.1| GF13376 [Drosophila ananassae]	0.790	Down	0.0493	13.796
Biological Process	GO:1902578	3	single-organism localization	0.143069	CL1996.Contig1_All	189 872 minus strand PREDICTED: endoplasmic reticulum resident protein 29-like [Acyrthosiphon pisum]	0.681	Down	0.00195	25.827
Biological Process	GO:1902578	3	single-organism localization	0.143069	CL3526.Contig1_All	118 1629 minus strand PREDICTED: similar to AGAP004610-PA [Tribolium castaneum]	0.759	Down	0.0366	55.407
Biological Process	GO:1902578	3	single-organism localization	0.143069	Unigene18189_All	95 1948 PREDICTED: signal recognition particle receptor subunit alpha homolog isoform 2 [Nasonia vitripennis]	0.757	Down	0.0112	68.989
Biological Process	GO:1902578	3	single-organism localization	0.143069	Unigene6577_All	206 781 JR-1 [Riptortus clavatus]	0.805	Down	0.0043	21.332
Biological Process	GO:1902578	3	single-organism localization	0.143069	Unigene4339_All	229 2178 signal recognition particle [Aedes aegypti] >gi|108881114|gb|EAT45339.1| signal recognition particle [Aedes aegypti]	0.797	Down	0.0344	73.405
Biological Process	GO:1902578	3	single-organism localization	0.143069	Unigene37158_All	"1 390 Chain A, Nmr Structure Of An Exchangeable Apolipoprotein-Manduca Sexta Apolipophorin-Iii"	0.320	Down	0.0468	14.639
Biological Process	GO:1901136	5	carbohydrate derivative catabolic process	0.312667	Unigene9901_All	178 1401 minus strand imaginal disk growth factor precursor [Acyrthosiphon pisum]	0.692	Down	0.0211	45.565
Biological Process	GO:1901136	5	carbohydrate derivative catabolic process	0.312667	CL3932.Contig1_All	105 1331 imaginal disc growth factor [Bombus ignitus]	0.702	Down	0.0136	45.732
Biological Process	GO:1901136	5	carbohydrate derivative catabolic process	0.312667	Unigene7845_All	85 1362 imaginal disc growth factor-like protein [Mamestra brassicae]	0.670	Down	0.000776	47.474
Biological Process	GO:0071702	5	organic substance transport	0.0681435	CL1996.Contig1_All	189 872 minus strand PREDICTED: endoplasmic reticulum resident protein 29-like [Acyrthosiphon pisum]	0.681	Down	0.00195	25.827
Biological Process	GO:0071702	5	organic substance transport	0.0681435	Unigene8238_All	124 408 Sec61 protein translocation complex beta subunit [Triatoma infestans] >gi|344190604|gb|AEM97988.1| Sec61 protein translocation complex beta subunit [Dipetalogaster maximus]	0.645	Down	0.00377	10.073
Biological Process	GO:0071702	5	organic substance transport	0.0681435	Unigene7799_All	1 1275 Sec61 alpha 1 subunit [Acyrthosiphon pisum] >gi|52630957|gb|AAU84942.1| probable transport protein Sec61 alpha subunit [Toxoptera citricida]	0.694	Down	0.0115	46.164
Biological Process	GO:0071702	5	organic substance transport	0.0681435	Unigene4339_All	229 2178 signal recognition particle [Aedes aegypti] >gi|108881114|gb|EAT45339.1| signal recognition particle [Aedes aegypti]	0.797	Down	0.0344	73.405
Biological Process	GO:0071702	5	organic substance transport	0.0681435	CL3526.Contig1_All	118 1629 minus strand PREDICTED: similar to AGAP004610-PA [Tribolium castaneum]	0.759	Down	0.0366	55.407
Biological Process	GO:0071702	5	organic substance transport	0.0681435	Unigene18189_All	95 1948 PREDICTED: signal recognition particle receptor subunit alpha homolog isoform 2 [Nasonia vitripennis]	0.757	Down	0.0112	68.989
Biological Process	GO:0071702	5	organic substance transport	0.0681435	Unigene14734_All	85 3276 minus strand Exportin-1 [Acromyrmex echinatior]	0.803	Down	0.00115	122.47
Biological Process	GO:0071702	5	organic substance transport	0.0681435	Unigene6577_All	206 781 JR-1 [Riptortus clavatus]	0.805	Down	0.0043	21.332
Biological Process	GO:0071702	5	organic substance transport	0.0681435	Unigene3554_All	161 1300 PREDICTED: tumor susceptibility gene 101 protein-like [Bombus impatiens]	0.786	Down	0.00156	42.997
Biological Process	GO:0071702	5	organic substance transport	0.0681435	Unigene37158_All	"1 390 Chain A, Nmr Structure Of An Exchangeable Apolipoprotein-Manduca Sexta Apolipophorin-Iii"	0.320	Down	0.0468	14.639
Biological Process	GO:0045184	5	establishment of protein localization	0.0987475	CL1996.Contig1_All	189 872 minus strand PREDICTED: endoplasmic reticulum resident protein 29-like [Acyrthosiphon pisum]	0.681	Down	0.00195	25.827
Biological Process	GO:0045184	5	establishment of protein localization	0.0987475	Unigene8238_All	124 408 Sec61 protein translocation complex beta subunit [Triatoma infestans] >gi|344190604|gb|AEM97988.1| Sec61 protein translocation complex beta subunit [Dipetalogaster maximus]	0.645	Down	0.00377	10.073
Biological Process	GO:0045184	5	establishment of protein localization	0.0987475	Unigene7799_All	1 1275 Sec61 alpha 1 subunit [Acyrthosiphon pisum] >gi|52630957|gb|AAU84942.1| probable transport protein Sec61 alpha subunit [Toxoptera citricida]	0.694	Down	0.0115	46.164
Biological Process	GO:0045184	5	establishment of protein localization	0.0987475	Unigene4339_All	229 2178 signal recognition particle [Aedes aegypti] >gi|108881114|gb|EAT45339.1| signal recognition particle [Aedes aegypti]	0.797	Down	0.0344	73.405
Biological Process	GO:0045184	5	establishment of protein localization	0.0987475	CL3526.Contig1_All	118 1629 minus strand PREDICTED: similar to AGAP004610-PA [Tribolium castaneum]	0.759	Down	0.0366	55.407
Biological Process	GO:0045184	5	establishment of protein localization	0.0987475	Unigene18189_All	95 1948 PREDICTED: signal recognition particle receptor subunit alpha homolog isoform 2 [Nasonia vitripennis]	0.757	Down	0.0112	68.989
Biological Process	GO:0045184	5	establishment of protein localization	0.0987475	Unigene14734_All	85 3276 minus strand Exportin-1 [Acromyrmex echinatior]	0.803	Down	0.00115	122.47
Biological Process	GO:0045184	5	establishment of protein localization	0.0987475	Unigene3554_All	161 1300 PREDICTED: tumor susceptibility gene 101 protein-like [Bombus impatiens]	0.786	Down	0.00156	42.997
Biological Process	GO:0061024	4	membrane organization	0.11392	CL3526.Contig1_All	118 1629 minus strand PREDICTED: similar to AGAP004610-PA [Tribolium castaneum]	0.759	Down	0.0366	55.407
Biological Process	GO:0061024	4	membrane organization	0.11392	Unigene18189_All	95 1948 PREDICTED: signal recognition particle receptor subunit alpha homolog isoform 2 [Nasonia vitripennis]	0.757	Down	0.0112	68.989
Biological Process	GO:0061024	4	membrane organization	0.11392	Unigene4339_All	229 2178 signal recognition particle [Aedes aegypti] >gi|108881114|gb|EAT45339.1| signal recognition particle [Aedes aegypti]	0.797	Down	0.0344	73.405
Biological Process	GO:1901564	4	organonitrogen compound metabolic process	0.00427028	Unigene14051_All	191 1885 minus strand AGAP006023-PA [Anopheles gambiae str. PEST] >gi|157015912|gb|EAA44132.3| AGAP006023-PA [Anopheles gambiae str. PEST]	0.400	Down	0.0399	64.477
Biological Process	GO:1901564	4	organonitrogen compound metabolic process	0.00427028	CL5531.Contig2_All	236 904 minus strand AGAP010364-PA [Anopheles gambiae str. PEST] >gi|157018426|gb|EAA07155.4| AGAP010364-PA [Anopheles gambiae str. PEST]	0.692	Down	0.0262	24.826
Biological Process	GO:1901564	4	organonitrogen compound metabolic process	0.00427028	Unigene18080_All	164 469 minus strand PREDICTED: similar to pterin-4a-carbinolamine dehydratase CG1963-PA [Tribolium castaneum]	0.833	Down	0.0221	11.702
Biological Process	GO:1901564	4	organonitrogen compound metabolic process	0.00427028	Unigene37139_All	1 330 ribosomal protein L17 [Heliconius melpomene cythera]	0.355	Down	0.0289	12.657
Biological Process	GO:1901564	4	organonitrogen compound metabolic process	0.00427028	CL3932.Contig1_All	105 1331 imaginal disc growth factor [Bombus ignitus]	0.702	Down	0.0136	45.732
Biological Process	GO:1901564	4	organonitrogen compound metabolic process	0.00427028	CL2767.Contig2_All	108 479 minus strand ribosomal protein S12 [Manduca sexta]	0.786	Down	0.007	13.62
Biological Process	GO:1901564	4	organonitrogen compound metabolic process	0.00427028	Unigene18871_All	110 670 minus strand signal peptidase 18 kDa subunit [Triatoma matogrossensis]	0.775	Down	0.00416	21.102
Biological Process	GO:1901564	4	organonitrogen compound metabolic process	0.00427028	Unigene18170_All	71 1378 phenylalanine-tryptophan hydroxylase [Gryllus bimaculatus]	0.623	Down	0.0499	49.963
Biological Process	GO:1901564	4	organonitrogen compound metabolic process	0.00427028	Unigene20699_All	77 364 minus strand signal peptidase complex subunit 1-like protein [Triatoma matogrossensis]	0.733	Down	0.00649	11.27
Biological Process	GO:1901564	4	organonitrogen compound metabolic process	0.00427028	Unigene13832_All	36 632 minus strand PREDICTED: similar to ribosomal protein L19e [Tribolium castaneum]	0.707	Down	0.00691	23.655
Biological Process	GO:1901564	4	organonitrogen compound metabolic process	0.00427028	Unigene13867_All	66 674 minus strand PREDICTED: 60S ribosomal protein L13a-like [Bombus impatiens]	0.767	Down	0.0117	23.136
Biological Process	GO:1901564	4	organonitrogen compound metabolic process	0.00427028	Unigene13854_All	213 746 PREDICTED: pyridoxine/pyridoxamine 5'-phosphate oxidase-like [Acyrthosiphon pisum]	0.725	Down	0.00625	20.762
Biological Process	GO:1901564	4	organonitrogen compound metabolic process	0.00427028	Unigene36112_All	2 256 minus strand ribosomal protein L13A [Antheraea yamamai]	0.160	Down	0.0165	9.8055
Biological Process	GO:1901564	4	organonitrogen compound metabolic process	0.00427028	Unigene17279_All	85 258 minus strand 40S ribosomal protein S14 [Rhodnius prolixus]	0.710	Down	0.0144	6.314
Biological Process	GO:1901564	4	organonitrogen compound metabolic process	0.00427028	Unigene10693_All	165 494 translation initiation factor 1 [Triatoma infestans]	0.764	Down	0.00977	12.402
Biological Process	GO:1901564	4	organonitrogen compound metabolic process	0.00427028	Unigene20011_All	91 669 minus strand signal peptidase complex subunit SPC25 [Dipetalogaster maximus]	0.820	Down	0.0407	22.029
Biological Process	GO:1901564	4	organonitrogen compound metabolic process	0.00427028	Unigene6180_All	66 413 minus strand 60S ribosomal protein L34 [Acromyrmex echinatior]	0.630	Down	0.0198	13.788
Biological Process	GO:1901564	4	organonitrogen compound metabolic process	0.00427028	Unigene20694_All	74 442 ribosomal protein L35 [Chrysomela tremula]	0.506	Down	0.0415	14.381
Biological Process	GO:1901564	4	organonitrogen compound metabolic process	0.00427028	Unigene9901_All	178 1401 minus strand imaginal disk growth factor precursor [Acyrthosiphon pisum]	0.692	Down	0.0211	45.565
Biological Process	GO:1901564	4	organonitrogen compound metabolic process	0.00427028	Unigene7845_All	85 1362 imaginal disc growth factor-like protein [Mamestra brassicae]	0.670	Down	0.000776	47.474
Biological Process	GO:1901564	4	organonitrogen compound metabolic process	0.00427028	Unigene14014_All	"90 1181 fructose 1,6-bisphosphate aldolase [Schistocerca gregaria]"	0.728	Down	0.00158	39.841
Biological Process	GO:1901564	4	organonitrogen compound metabolic process	0.00427028	Unigene11792_All	70 702 minus strand 60S ribosomal protein L15 [Harpegnathos saltator]	0.714	Down	0.0319	24.846
Biological Process	GO:1901564	4	organonitrogen compound metabolic process	0.00427028	CL2905.Contig2_All	2 1228 PREDICTED: inosine-5'-monophosphate dehydrogenase isoform 1 [Apis mellifera]	0.757	Down	0.0147	44.004
Biological Process	GO:1901564	4	organonitrogen compound metabolic process	0.00427028	CL2035.Contig3_All	56 676 PREDICTED: probable saccharopine dehydrogenase-like isoform 1 [Apis mellifera]	0.532	Down	0.000159	23.532
Biological Process	GO:1901564	4	organonitrogen compound metabolic process	0.00427028	Unigene42637_All	1 393 S3a protein [Antheraea pernyi]	0.186	Down	0.00546	15.208
Biological Process	GO:1901564	4	organonitrogen compound metabolic process	0.00427028	Unigene7603_All	48 788 minus strand 40S ribosomal protein S6 [Acromyrmex echinatior]	0.820	Down	0.0199	28.505
Biological Process	GO:1901564	4	organonitrogen compound metabolic process	0.00427028	Unigene1463_All	243 935 minus strand cuticular protein analogous to peritrophins 1-G precursor [Tribolium castaneum] >gi|268309012|gb|ACY95472.1| cuticular protein analogous to peritrophins 1-G [Tribolium castaneum]	0.807	Down	0.0275	27.34
Biological Process	GO:1901564	4	organonitrogen compound metabolic process	0.00427028	CL1551.Contig2_All	79 903 minus strand PREDICTED: similar to ribosomal protein S2 [Tribolium castaneum]	0.823	Down	0.0049	29.45
Biological Process	GO:1901564	4	organonitrogen compound metabolic process	0.00427028	CL4142.Contig2_All	457 1764 minus strand Eukaryotic peptide chain release factor subunit 1 [Acromyrmex echinatior]	0.732	Down	0.0094	49.047
Biological Process	GO:1901564	4	organonitrogen compound metabolic process	0.00427028	Unigene9670_All	100 642 minus strand GI23507 [Drosophila mojavensis] >gi|193915264|gb|EDW14131.1| GI23507 [Drosophila mojavensis]	0.746	Down	0.00259	20.452
Biological Process	GO:0006465	8	signal peptide processing	0.0114091	Unigene20699_All	77 364 minus strand signal peptidase complex subunit 1-like protein [Triatoma matogrossensis]	0.733	Down	0.00649	11.27
Biological Process	GO:0006465	8	signal peptide processing	0.0114091	Unigene20011_All	91 669 minus strand signal peptidase complex subunit SPC25 [Dipetalogaster maximus]	0.820	Down	0.0407	22.029
Biological Process	GO:0006465	8	signal peptide processing	0.0114091	Unigene18871_All	110 670 minus strand signal peptidase 18 kDa subunit [Triatoma matogrossensis]	0.775	Down	0.00416	21.102
Biological Process	GO:0006026	6	aminoglycan catabolic process	0.144798	Unigene9901_All	178 1401 minus strand imaginal disk growth factor precursor [Acyrthosiphon pisum]	0.692	Down	0.0211	45.565
Biological Process	GO:0006026	6	aminoglycan catabolic process	0.144798	CL3932.Contig1_All	105 1331 imaginal disc growth factor [Bombus ignitus]	0.702	Down	0.0136	45.732
Biological Process	GO:0006026	6	aminoglycan catabolic process	0.144798	Unigene7845_All	85 1362 imaginal disc growth factor-like protein [Mamestra brassicae]	0.670	Down	0.000776	47.474
Biological Process	GO:0006032	8	chitin catabolic process	0.11392	Unigene9901_All	178 1401 minus strand imaginal disk growth factor precursor [Acyrthosiphon pisum]	0.692	Down	0.0211	45.565
Biological Process	GO:0006032	8	chitin catabolic process	0.11392	CL3932.Contig1_All	105 1331 imaginal disc growth factor [Bombus ignitus]	0.702	Down	0.0136	45.732
Biological Process	GO:0006032	8	chitin catabolic process	0.11392	Unigene7845_All	85 1362 imaginal disc growth factor-like protein [Mamestra brassicae]	0.670	Down	0.000776	47.474
Biological Process	GO:0051234	3	establishment of localization	0.0437376	CL1996.Contig1_All	189 872 minus strand PREDICTED: endoplasmic reticulum resident protein 29-like [Acyrthosiphon pisum]	0.681	Down	0.00195	25.827
Biological Process	GO:0051234	3	establishment of localization	0.0437376	Unigene8238_All	124 408 Sec61 protein translocation complex beta subunit [Triatoma infestans] >gi|344190604|gb|AEM97988.1| Sec61 protein translocation complex beta subunit [Dipetalogaster maximus]	0.645	Down	0.00377	10.073
Biological Process	GO:0051234	3	establishment of localization	0.0437376	Unigene4411_All	"134 1021 minus strand PREDICTED: similar to adp,atp carrier protein [Tribolium castaneum]"	0.307	Down	0.000254	33.253
Biological Process	GO:0051234	3	establishment of localization	0.0437376	Unigene4339_All	229 2178 signal recognition particle [Aedes aegypti] >gi|108881114|gb|EAT45339.1| signal recognition particle [Aedes aegypti]	0.797	Down	0.0344	73.405
Biological Process	GO:0051234	3	establishment of localization	0.0437376	Unigene18189_All	95 1948 PREDICTED: signal recognition particle receptor subunit alpha homolog isoform 2 [Nasonia vitripennis]	0.757	Down	0.0112	68.989
Biological Process	GO:0051234	3	establishment of localization	0.0437376	Unigene5795_All	74 652 minus strand transmembrane emp24 domain trafficking protein 2 [Triatoma matogrossensis]	0.720	Down	0.00897	21.809
Biological Process	GO:0051234	3	establishment of localization	0.0437376	Unigene32260_All	150 1004 PREDICTED: similar to golgi phosphoprotein 3 (coat-protein GPP34) [Tribolium castaneum]	0.801	Down	0.00569	32.615
Biological Process	GO:0051234	3	establishment of localization	0.0437376	Unigene3554_All	161 1300 PREDICTED: tumor susceptibility gene 101 protein-like [Bombus impatiens]	0.786	Down	0.00156	42.997
Biological Process	GO:0051234	3	establishment of localization	0.0437376	Unigene37158_All	"1 390 Chain A, Nmr Structure Of An Exchangeable Apolipoprotein-Manduca Sexta Apolipophorin-Iii"	0.320	Down	0.0468	14.639
Biological Process	GO:0051234	3	establishment of localization	0.0437376	Unigene10781_All	237 1721 PREDICTED: similar to rasputin CG9412-PB [Tribolium castaneum]	0.792	Down	0.0384	54.607
Biological Process	GO:0051234	3	establishment of localization	0.0437376	Unigene7790_All	3 1208 minus strand PREDICTED: ATP-binding cassette sub-family D member 2-like [Acyrthosiphon pisum]	0.737	Down	0.0117	44.528
Biological Process	GO:0051234	3	establishment of localization	0.0437376	Unigene7799_All	1 1275 Sec61 alpha 1 subunit [Acyrthosiphon pisum] >gi|52630957|gb|AAU84942.1| probable transport protein Sec61 alpha subunit [Toxoptera citricida]	0.694	Down	0.0115	46.164
Biological Process	GO:0051234	3	establishment of localization	0.0437376	Unigene15938_All	113 706 GJ14099 [Drosophila virilis] >gi|194155827|gb|EDW71011.1| GJ14099 [Drosophila virilis]	0.807	Down	0.00632	22.083
Biological Process	GO:0051234	3	establishment of localization	0.0437376	Unigene6584_All	149 787 PREDICTED: similar to snare protein sec22 [Tribolium castaneum]	0.709	Down	0.0296	24.654
Biological Process	GO:0051234	3	establishment of localization	0.0437376	Unigene10595_All	9 1373 minus strand sugar transporter 2 [Nilaparvata lugens]	0.756	Down	0.0173	49.419
Biological Process	GO:0051234	3	establishment of localization	0.0437376	Unigene17927_All	105 473 minus strand GF13376 [Drosophila ananassae] >gi|190621768|gb|EDV37292.1| GF13376 [Drosophila ananassae]	0.790	Down	0.0493	13.796
Biological Process	GO:0051234	3	establishment of localization	0.0437376	CL3526.Contig1_All	118 1629 minus strand PREDICTED: similar to AGAP004610-PA [Tribolium castaneum]	0.759	Down	0.0366	55.407
Biological Process	GO:0051234	3	establishment of localization	0.0437376	Unigene14734_All	85 3276 minus strand Exportin-1 [Acromyrmex echinatior]	0.803	Down	0.00115	122.47
Biological Process	GO:0051234	3	establishment of localization	0.0437376	Unigene4507_All	244 2160 minus strand PREDICTED: solute carrier organic anion transporter family member 5A1-like [Bombus terrestris]	0.685	Down	0.0141	70.739
Biological Process	GO:0051234	3	establishment of localization	0.0437376	CL198.Contig2_All	110 982 CRAL/TRIO domain-containing protein [Culex quinquefasciatus] >gi|167869862|gb|EDS33245.1| CRAL/TRIO domain-containing protein [Culex quinquefasciatus]	0.798	Down	0.0118	34.003
Biological Process	GO:0051234	3	establishment of localization	0.0437376	Unigene6577_All	206 781 JR-1 [Riptortus clavatus]	0.805	Down	0.0043	21.332
Biological Process	GO:0006605	8	protein targeting	0.244459	CL3526.Contig1_All	118 1629 minus strand PREDICTED: similar to AGAP004610-PA [Tribolium castaneum]	0.759	Down	0.0366	55.407
Biological Process	GO:0006605	8	protein targeting	0.244459	Unigene18189_All	95 1948 PREDICTED: signal recognition particle receptor subunit alpha homolog isoform 2 [Nasonia vitripennis]	0.757	Down	0.0112	68.989
Biological Process	GO:0006605	8	protein targeting	0.244459	Unigene4339_All	229 2178 signal recognition particle [Aedes aegypti] >gi|108881114|gb|EAT45339.1| signal recognition particle [Aedes aegypti]	0.797	Down	0.0344	73.405
Biological Process	GO:0006457	3	protein folding	0.0191641	Unigene1531_All	2 1027 minus strand heat shock protein 90 [Gryllus firmus]	0.296	Down	0.003	40.54
Biological Process	GO:0006457	3	protein folding	0.0191641	Unigene9879_All	"212 1930 minus strand PREDICTED: 60 kDa heat shock protein, mitochondrial-like isoform 1 [Nasonia vitripennis] >gi|345497194|ref|XP_003427933.1| PREDICTED: 60 kDa heat shock protein, mitochondrial-like isoform 2 [Nasonia vitripennis]"	0.678	Down	0.00154	60.548
Biological Process	GO:0006457	3	protein folding	0.0191641	Unigene7889_All	"121 831 minus strand PREDICTED: grpE protein homolog 1, mitochondrial-like [Nasonia vitripennis]"	0.826	Down	0.00733	26.969
Biological Process	GO:0006457	3	protein folding	0.0191641	CL331.Contig1_All	128 2281 minus strand heat shock protein 90 [Gryllus firmus]	0.805	Down	0.00374	82.6
Biological Process	GO:0006457	3	protein folding	0.0191641	Unigene20070_All	"234 536 PREDICTED: 10 kDa heat shock protein, mitochondrial-like [Nasonia vitripennis]"	0.608	Down	0.00219	10.875
Biological Process	GO:0006457	3	protein folding	0.0191641	CL4726.Contig2_All	122 742 minus strand PREDICTED: peptidyl-prolyl cis-trans isomerase B-like [Nasonia vitripennis]	0.821	Down	0.0335	22.554
Biological Process	GO:0006457	3	protein folding	0.0191641	Unigene9891_All	106 2436 endoplasmin [Locusta migratoria]	0.677	Down	0.00503	88.485
Biological Process	GO:0006412	8	translation	0.0686534	Unigene10693_All	165 494 translation initiation factor 1 [Triatoma infestans]	0.764	Down	0.00977	12.402
Biological Process	GO:0006412	8	translation	0.0686534	Unigene6180_All	66 413 minus strand 60S ribosomal protein L34 [Acromyrmex echinatior]	0.630	Down	0.0198	13.788
Biological Process	GO:0006412	8	translation	0.0686534	Unigene20694_All	74 442 ribosomal protein L35 [Chrysomela tremula]	0.506	Down	0.0415	14.381
Biological Process	GO:0006412	8	translation	0.0686534	Unigene37139_All	1 330 ribosomal protein L17 [Heliconius melpomene cythera]	0.355	Down	0.0289	12.657
Biological Process	GO:0006412	8	translation	0.0686534	CL2767.Contig2_All	108 479 minus strand ribosomal protein S12 [Manduca sexta]	0.786	Down	0.007	13.62
Biological Process	GO:0006412	8	translation	0.0686534	Unigene11792_All	70 702 minus strand 60S ribosomal protein L15 [Harpegnathos saltator]	0.714	Down	0.0319	24.846
Biological Process	GO:0006412	8	translation	0.0686534	Unigene13832_All	36 632 minus strand PREDICTED: similar to ribosomal protein L19e [Tribolium castaneum]	0.707	Down	0.00691	23.655
Biological Process	GO:0006412	8	translation	0.0686534	Unigene13867_All	66 674 minus strand PREDICTED: 60S ribosomal protein L13a-like [Bombus impatiens]	0.767	Down	0.0117	23.136
Biological Process	GO:0006412	8	translation	0.0686534	Unigene42637_All	1 393 S3a protein [Antheraea pernyi]	0.186	Down	0.00546	15.208
Biological Process	GO:0006412	8	translation	0.0686534	Unigene7603_All	48 788 minus strand 40S ribosomal protein S6 [Acromyrmex echinatior]	0.820	Down	0.0199	28.505
Biological Process	GO:0006412	8	translation	0.0686534	Unigene36112_All	2 256 minus strand ribosomal protein L13A [Antheraea yamamai]	0.160	Down	0.0165	9.8055
Biological Process	GO:0006412	8	translation	0.0686534	CL1551.Contig2_All	79 903 minus strand PREDICTED: similar to ribosomal protein S2 [Tribolium castaneum]	0.823	Down	0.0049	29.45
Biological Process	GO:0006412	8	translation	0.0686534	CL4142.Contig2_All	457 1764 minus strand Eukaryotic peptide chain release factor subunit 1 [Acromyrmex echinatior]	0.732	Down	0.0094	49.047
Biological Process	GO:0006412	8	translation	0.0686534	Unigene17279_All	85 258 minus strand 40S ribosomal protein S14 [Rhodnius prolixus]	0.710	Down	0.0144	6.314
Biological Process	GO:0071822	5	protein complex subunit organization	0.477284	CL4142.Contig2_All	457 1764 minus strand Eukaryotic peptide chain release factor subunit 1 [Acromyrmex echinatior]	0.732	Down	0.0094	49.047
Biological Process	GO:0071822	5	protein complex subunit organization	0.477284	CL95.Contig1_All	180 1958 PREDICTED: phosphatidylinositol-binding clathrin assembly protein LAP-like isoform 2 [Acyrthosiphon pisum]	0.748	Down	0.00132	63.929
Biological Process	GO:0043603	5	cellular amide metabolic process	0.00643035	Unigene37139_All	1 330 ribosomal protein L17 [Heliconius melpomene cythera]	0.355	Down	0.0289	12.657
Biological Process	GO:0043603	5	cellular amide metabolic process	0.00643035	CL2767.Contig2_All	108 479 minus strand ribosomal protein S12 [Manduca sexta]	0.786	Down	0.007	13.62
Biological Process	GO:0043603	5	cellular amide metabolic process	0.00643035	Unigene18871_All	110 670 minus strand signal peptidase 18 kDa subunit [Triatoma matogrossensis]	0.775	Down	0.00416	21.102
Biological Process	GO:0043603	5	cellular amide metabolic process	0.00643035	Unigene20699_All	77 364 minus strand signal peptidase complex subunit 1-like protein [Triatoma matogrossensis]	0.733	Down	0.00649	11.27
Biological Process	GO:0043603	5	cellular amide metabolic process	0.00643035	Unigene13832_All	36 632 minus strand PREDICTED: similar to ribosomal protein L19e [Tribolium castaneum]	0.707	Down	0.00691	23.655
Biological Process	GO:0043603	5	cellular amide metabolic process	0.00643035	Unigene13867_All	66 674 minus strand PREDICTED: 60S ribosomal protein L13a-like [Bombus impatiens]	0.767	Down	0.0117	23.136
Biological Process	GO:0043603	5	cellular amide metabolic process	0.00643035	Unigene36112_All	2 256 minus strand ribosomal protein L13A [Antheraea yamamai]	0.160	Down	0.0165	9.8055
Biological Process	GO:0043603	5	cellular amide metabolic process	0.00643035	Unigene17279_All	85 258 minus strand 40S ribosomal protein S14 [Rhodnius prolixus]	0.710	Down	0.0144	6.314
Biological Process	GO:0043603	5	cellular amide metabolic process	0.00643035	Unigene10693_All	165 494 translation initiation factor 1 [Triatoma infestans]	0.764	Down	0.00977	12.402
Biological Process	GO:0043603	5	cellular amide metabolic process	0.00643035	Unigene20011_All	91 669 minus strand signal peptidase complex subunit SPC25 [Dipetalogaster maximus]	0.820	Down	0.0407	22.029
Biological Process	GO:0043603	5	cellular amide metabolic process	0.00643035	Unigene6180_All	66 413 minus strand 60S ribosomal protein L34 [Acromyrmex echinatior]	0.630	Down	0.0198	13.788
Biological Process	GO:0043603	5	cellular amide metabolic process	0.00643035	Unigene20694_All	74 442 ribosomal protein L35 [Chrysomela tremula]	0.506	Down	0.0415	14.381
Biological Process	GO:0043603	5	cellular amide metabolic process	0.00643035	Unigene11792_All	70 702 minus strand 60S ribosomal protein L15 [Harpegnathos saltator]	0.714	Down	0.0319	24.846
Biological Process	GO:0043603	5	cellular amide metabolic process	0.00643035	CL2035.Contig3_All	56 676 PREDICTED: probable saccharopine dehydrogenase-like isoform 1 [Apis mellifera]	0.532	Down	0.000159	23.532
Biological Process	GO:0043603	5	cellular amide metabolic process	0.00643035	Unigene7603_All	48 788 minus strand 40S ribosomal protein S6 [Acromyrmex echinatior]	0.820	Down	0.0199	28.505
Biological Process	GO:0043603	5	cellular amide metabolic process	0.00643035	Unigene42637_All	1 393 S3a protein [Antheraea pernyi]	0.186	Down	0.00546	15.208
Biological Process	GO:0043603	5	cellular amide metabolic process	0.00643035	CL1551.Contig2_All	79 903 minus strand PREDICTED: similar to ribosomal protein S2 [Tribolium castaneum]	0.823	Down	0.0049	29.45
Biological Process	GO:0043603	5	cellular amide metabolic process	0.00643035	CL4142.Contig2_All	457 1764 minus strand Eukaryotic peptide chain release factor subunit 1 [Acromyrmex echinatior]	0.732	Down	0.0094	49.047
Biological Process	GO:0006613	10	cotranslational protein targeting to membrane	0.0365336	CL3526.Contig1_All	118 1629 minus strand PREDICTED: similar to AGAP004610-PA [Tribolium castaneum]	0.759	Down	0.0366	55.407
Biological Process	GO:0006613	10	cotranslational protein targeting to membrane	0.0365336	Unigene18189_All	95 1948 PREDICTED: signal recognition particle receptor subunit alpha homolog isoform 2 [Nasonia vitripennis]	0.757	Down	0.0112	68.989
Biological Process	GO:0006613	10	cotranslational protein targeting to membrane	0.0365336	Unigene4339_All	229 2178 signal recognition particle [Aedes aegypti] >gi|108881114|gb|EAT45339.1| signal recognition particle [Aedes aegypti]	0.797	Down	0.0344	73.405
Biological Process	GO:0006022	5	aminoglycan metabolic process	0.134252	CL5531.Contig2_All	236 904 minus strand AGAP010364-PA [Anopheles gambiae str. PEST] >gi|157018426|gb|EAA07155.4| AGAP010364-PA [Anopheles gambiae str. PEST]	0.692	Down	0.0262	24.826
Biological Process	GO:0006022	5	aminoglycan metabolic process	0.134252	Unigene9901_All	178 1401 minus strand imaginal disk growth factor precursor [Acyrthosiphon pisum]	0.692	Down	0.0211	45.565
Biological Process	GO:0006022	5	aminoglycan metabolic process	0.134252	CL3932.Contig1_All	105 1331 imaginal disc growth factor [Bombus ignitus]	0.702	Down	0.0136	45.732
Biological Process	GO:0006022	5	aminoglycan metabolic process	0.134252	Unigene7845_All	85 1362 imaginal disc growth factor-like protein [Mamestra brassicae]	0.670	Down	0.000776	47.474
Biological Process	GO:0006022	5	aminoglycan metabolic process	0.134252	Unigene1463_All	243 935 minus strand cuticular protein analogous to peritrophins 1-G precursor [Tribolium castaneum] >gi|268309012|gb|ACY95472.1| cuticular protein analogous to peritrophins 1-G [Tribolium castaneum]	0.807	Down	0.0275	27.34
Biological Process	GO:0051604	6	protein maturation	0.0268778	Unigene20699_All	77 364 minus strand signal peptidase complex subunit 1-like protein [Triatoma matogrossensis]	0.733	Down	0.00649	11.27
Biological Process	GO:0051604	6	protein maturation	0.0268778	Unigene20011_All	91 669 minus strand signal peptidase complex subunit SPC25 [Dipetalogaster maximus]	0.820	Down	0.0407	22.029
Biological Process	GO:0051604	6	protein maturation	0.0268778	Unigene18871_All	110 670 minus strand signal peptidase 18 kDa subunit [Triatoma matogrossensis]	0.775	Down	0.00416	21.102
