# Supplementary material for: Differential Proteomics Analysis Unraveled Mechanisms of Arma chinensis Responding to Improved Artificial Diet
Source: Insects. 2022 Jul 2;13(7):605. doi: 10.3390/insects13070605 (PMC9319121; doi:10.3390/insects13070605)
Supplement: Supplementary file 1 [file insects-13-00605-s001.zip › Supplementary Table S10.xlsx]

## Sheet: Up Pathway2Protein
Table S10. KEGG pathway enrichment analysis for the up-regulated DEPs in IADA/COSMA.
KEGG pathway	Fisher's exact test p value	Protein accession	Protein description	IADA/COSMA Ratio	Regulated Type	IADA/COSMA P value	MW [kDa]
dme00380 Tryptophan metabolism - Drosophila melanogaster (fruit fly)	0.533815	CL2426.Contig2_All	1 1044 PREDICTED: similar to aromatic amino acid decarboxylase [Tribolium castaneum]	1.660	Up	0.00998	39.698
dme00380 Tryptophan metabolism - Drosophila melanogaster (fruit fly)	0.533815	Unigene3580_All	77 1495 minus strand kynurenine aminotransferase [Glossina morsitans morsitans]	1.320	Up	0.00231	53.372
dme00760 Nicotinate and nicotinamide metabolism - Drosophila melanogaster (fruit fly)	0.235381	Unigene10540_All	49 1608 79 kDa salivary apyrase precursor [Triatoma infestans]	1.353	Up	0.0176	57.061
dme00760 Nicotinate and nicotinamide metabolism - Drosophila melanogaster (fruit fly)	0.235381	CL5006.Contig1_All	107 847 minus strand PREDICTED: similar to nicotinamide mononucleotide adenylyltransferase 1 [Tribolium castaneum]	1.259	Up	0.00521	28.078
dme00250 Alanine, aspartate and glutamate metabolism - Drosophila melanogaster (fruit fly)	0.0157243	Unigene6523_All	2 715 minus strand alanine-glyoxylate aminotransferase [Aedes aegypti] >gi|108884056|gb|EAT48281.1| alanine-glyoxylate aminotransferase [Aedes aegypti]	1.520	Up	0.00318	25.851
dme00250 Alanine, aspartate and glutamate metabolism - Drosophila melanogaster (fruit fly)	0.0157243	Unigene17115_All	204 1901 minus strand PREDICTED: similar to pyrroline-5-carboxylate dehydrogenase [Tribolium castaneum]	1.216	Up	0.00739	62.781
dme00250 Alanine, aspartate and glutamate metabolism - Drosophila melanogaster (fruit fly)	0.0157243	CL750.Contig1_All	387 1769 minus strand PREDICTED: similar to 4-aminobutyrate aminotransferase [Tribolium castaneum]	1.518	Up	0.000565	51.43
dme00250 Alanine, aspartate and glutamate metabolism - Drosophila melanogaster (fruit fly)	0.0157243	Unigene7813_All	"145 1785 minus strand PREDICTED: glutamate dehydrogenase, mitochondrial-like [Acyrthosiphon pisum]"	1.593	Up	1.42e-05	60.613
dme00250 Alanine, aspartate and glutamate metabolism - Drosophila melanogaster (fruit fly)	0.0157243	CL2400.Contig1_All	276 1712 minus strand PREDICTED: alanine aminotransferase 2-like [Acyrthosiphon pisum]	1.236	Up	0.0202	53.876
dme04310 Wnt signaling pathway - Drosophila melanogaster (fruit fly)	0.716798	Unigene22151_All	114 1052 minus strand PREDICTED: serine/threonine-protein phosphatase 2B catalytic subunit 3-like [Acyrthosiphon pisum]	1.254	Up	0.0246	35.707
dme04310 Wnt signaling pathway - Drosophila melanogaster (fruit fly)	0.716798	CL1716.Contig1_All	207 1253 minus strand calcium/calmodulin-dependent protein kinase II isoform A [Periplaneta americana]	1.228	Up	0.0162	39.262
dme00982 Drug metabolism - cytochrome P450 - Drosophila melanogaster (fruit fly)	0.5544	Unigene18246_All	161 760 glutathione S-transferase-like [Acyrthosiphon pisum] >gi|239790948|dbj|BAH72002.1| ACYPI002679 [Acyrthosiphon pisum]	1.518	Up	0.0396	24.096
dme00982 Drug metabolism - cytochrome P450 - Drosophila melanogaster (fruit fly)	0.5544	CL4438.Contig1_All	81 1598 minus strand PREDICTED: UDP-glucuronosyltransferase 2C1-like [Acyrthosiphon pisum]	1.331	Up	0.0107	57.85
dme00910 Nitrogen metabolism - Drosophila melanogaster (fruit fly)	0.268904	Unigene18248_All	19 855 minus strand PREDICTED: carbonic anhydrase 2-like [Acyrthosiphon pisum]	1.255	Up	0.0345	31.622
dme00910 Nitrogen metabolism - Drosophila melanogaster (fruit fly)	0.268904	Unigene7813_All	"145 1785 minus strand PREDICTED: glutamate dehydrogenase, mitochondrial-like [Acyrthosiphon pisum]"	1.593	Up	1.42e-05	60.613
dme04145 Phagosome - Drosophila melanogaster (fruit fly)	0.313341	Unigene6441_All	223 2769 vacuolar proton atpases [Aedes aegypti] >gi|108869446|gb|EAT33671.1| vacuolar proton atpases [Aedes aegypti]	1.302	Up	0.00277	95.927
dme04145 Phagosome - Drosophila melanogaster (fruit fly)	0.313341	Unigene16075_All	173 1174 minus strand cathepsin L-like cysteine protease 2 [Plautia stali]	1.206	Up	0.0277	37.586
dme04145 Phagosome - Drosophila melanogaster (fruit fly)	0.313341	CL3401.Contig1_All	"112 1239 actin related protein 1 [Acyrthosiphon pisum] >gi|242011914|ref|XP_002426688.1| Actin, muscle [Pediculus humanus corporis] >gi|77158630|gb|ABA62321.1| beta-actin [Reticulitermes flavipes] >gi|212510859|gb|EEB13950.1| Actin, muscle [Pediculus humanus corporis]"	1.209	Up	0.0157	41.785
dme04145 Phagosome - Drosophila melanogaster (fruit fly)	0.313341	Unigene18227_All	88 1020 lysosomal membrane glycoprotein [Triatoma matogrossensis]	1.272	Up	0.0103	33.646
dme00511 Other glycan degradation - Drosophila melanogaster (fruit fly)	0.361023	Unigene9903_All	"226 1539 minus strand PREDICTED: similar to fucosidase, alpha-L- 2, plasma [Tribolium castaneum]"	1.227	Up	0.00429	50.82
dme00511 Other glycan degradation - Drosophila melanogaster (fruit fly)	0.361023	Unigene18202_All	160 1980 minus strand PREDICTED: beta-galactosidase-like [Acyrthosiphon pisum]	1.340	Up	0.0184	68.82
dme04146 Peroxisome - Drosophila melanogaster (fruit fly)	0.288885	Unigene14958_All	206 616 Cu/Zn superoxide dismutase [Cavia porcellus]	1.323	Up	0.0123	14.147
dme04146 Peroxisome - Drosophila melanogaster (fruit fly)	0.288885	Unigene2139_All	163 2151 minus strand PREDICTED: similar to acyl-CoA oxidase [Tribolium castaneum]	1.235	Up	0.0186	75.236
dme04146 Peroxisome - Drosophila melanogaster (fruit fly)	0.288885	Unigene8465_All	23 1945 minus strand PREDICTED: aldehyde oxidase-like [Bombus terrestris]	1.583	Up	0.00291	71.07
dme04146 Peroxisome - Drosophila melanogaster (fruit fly)	0.288885	CL3288.Contig1_All	69 1193 minus strand PREDICTED: alpha-methylacyl-CoA racemase-like isoform 1 [Nasonia vitripennis] >gi|345483632|ref|XP_003424858.1| PREDICTED: alpha-methylacyl-CoA racemase-like isoform 2 [Nasonia vitripennis]	1.321	Up	0.0216	41.208
dme00051 Fructose and mannose metabolism - Drosophila melanogaster (fruit fly)	0.5544	Unigene9980_All	96 1034 minus strand PREDICTED: similar to CG6084 CG6084-PA [Tribolium castaneum]	1.308	Up	0.00448	35.758
dme00051 Fructose and mannose metabolism - Drosophila melanogaster (fruit fly)	0.5544	Unigene18282_All	400 1320 PREDICTED: similar to CG6084 CG6084-PA [Tribolium castaneum]	1.300	Up	0.00649	34.703
dme00983 Drug metabolism - other enzymes - Drosophila melanogaster (fruit fly)	0.66038	Unigene8465_All	23 1945 minus strand PREDICTED: aldehyde oxidase-like [Bombus terrestris]	1.583	Up	0.00291	71.07
dme00983 Drug metabolism - other enzymes - Drosophila melanogaster (fruit fly)	0.66038	CL4438.Contig1_All	81 1598 minus strand PREDICTED: UDP-glucuronosyltransferase 2C1-like [Acyrthosiphon pisum]	1.331	Up	0.0107	57.85
dme00220 Arginine biosynthesis - Drosophila melanogaster (fruit fly)	0.331665	Unigene7813_All	"145 1785 minus strand PREDICTED: glutamate dehydrogenase, mitochondrial-like [Acyrthosiphon pisum]"	1.593	Up	1.42e-05	60.613
dme00220 Arginine biosynthesis - Drosophila melanogaster (fruit fly)	0.331665	CL2400.Contig1_All	276 1712 minus strand PREDICTED: alanine aminotransferase 2-like [Acyrthosiphon pisum]	1.236	Up	0.0202	53.876
dme00270 Cysteine and methionine metabolism - Drosophila melanogaster (fruit fly)	0.703626	Unigene6523_All	2 715 minus strand alanine-glyoxylate aminotransferase [Aedes aegypti] >gi|108884056|gb|EAT48281.1| alanine-glyoxylate aminotransferase [Aedes aegypti]	1.520	Up	0.00318	25.851
dme00270 Cysteine and methionine metabolism - Drosophila melanogaster (fruit fly)	0.703626	CL880.Contig1_All	190 1272 minus strand PREDICTED: adenosylhomocysteinase A-like [Anolis carolinensis]	1.207	Up	0.0257	39.899
dme00280 Valine, leucine and isoleucine degradation - Drosophila melanogaster (fruit fly)	0.194089	Unigene6523_All	2 715 minus strand alanine-glyoxylate aminotransferase [Aedes aegypti] >gi|108884056|gb|EAT48281.1| alanine-glyoxylate aminotransferase [Aedes aegypti]	1.520	Up	0.00318	25.851
dme00280 Valine, leucine and isoleucine degradation - Drosophila melanogaster (fruit fly)	0.194089	Unigene113_All	"142 1734 minus strand PREDICTED: methylcrotonoyl-CoA carboxylase beta chain, mitochondrial-like [Oreochromis niloticus]"	1.310	Up	0.00232	57.476
dme00280 Valine, leucine and isoleucine degradation - Drosophila melanogaster (fruit fly)	0.194089	CL750.Contig1_All	387 1769 minus strand PREDICTED: similar to 4-aminobutyrate aminotransferase [Tribolium castaneum]	1.518	Up	0.000565	51.43
dme00280 Valine, leucine and isoleucine degradation - Drosophila melanogaster (fruit fly)	0.194089	Unigene1599_All	"48 1271 PREDICTED: isovaleryl-CoA dehydrogenase, mitochondrial-like [Bombus impatiens]"	1.336	Up	0.0295	44.821
dme00260 Glycine, serine and threonine metabolism - Drosophila melanogaster (fruit fly)	0.232718	Unigene6523_All	2 715 minus strand alanine-glyoxylate aminotransferase [Aedes aegypti] >gi|108884056|gb|EAT48281.1| alanine-glyoxylate aminotransferase [Aedes aegypti]	1.520	Up	0.00318	25.851
dme00260 Glycine, serine and threonine metabolism - Drosophila melanogaster (fruit fly)	0.232718	CL1212.Contig1_All	172 1263 minus strand AGAP003688-PA [Anopheles gambiae str. PEST] >gi|157017532|gb|EAA08948.4| AGAP003688-PA [Anopheles gambiae str. PEST]	1.798	Up	0.00461	40.45
dme00260 Glycine, serine and threonine metabolism - Drosophila melanogaster (fruit fly)	0.232718	Unigene2236_All	208 1902 PREDICTED: glucose dehydrogenase [acceptor]-like isoform 1 [Acyrthosiphon pisum] >gi|328705616|ref|XP_003242858.1| PREDICTED: glucose dehydrogenase [acceptor]-like isoform 2 [Acyrthosiphon pisum]	1.386	Up	0.0329	62.685
dme00040 Pentose and glucuronate interconversions - Drosophila melanogaster (fruit fly)	0.0755453	Unigene9980_All	96 1034 minus strand PREDICTED: similar to CG6084 CG6084-PA [Tribolium castaneum]	1.308	Up	0.00448	35.758
dme00040 Pentose and glucuronate interconversions - Drosophila melanogaster (fruit fly)	0.0755453	Unigene18282_All	400 1320 PREDICTED: similar to CG6084 CG6084-PA [Tribolium castaneum]	1.300	Up	0.00649	34.703
dme00040 Pentose and glucuronate interconversions - Drosophila melanogaster (fruit fly)	0.0755453	CL3759.Contig2_All	186 1679 UDP-glucose pyrophosphorylase [Spodoptera exigua]	1.255	Up	0.0173	56.345
dme00040 Pentose and glucuronate interconversions - Drosophila melanogaster (fruit fly)	0.0755453	CL4438.Contig1_All	81 1598 minus strand PREDICTED: UDP-glucuronosyltransferase 2C1-like [Acyrthosiphon pisum]	1.331	Up	0.0107	57.85
dme00330 Arginine and proline metabolism - Drosophila melanogaster (fruit fly)	0.610929	Unigene17115_All	204 1901 minus strand PREDICTED: similar to pyrroline-5-carboxylate dehydrogenase [Tribolium castaneum]	1.216	Up	0.00739	62.781
dme00330 Arginine and proline metabolism - Drosophila melanogaster (fruit fly)	0.610929	CL78.Contig4_All	101 1975 proline dehydrogenase isoform 1 [Leptinotarsa decemlineata]	1.378	Up	0.0018	71.224
dme04142 Lysosome - Drosophila melanogaster (fruit fly)	4.74315e-05	Unigene6441_All	223 2769 vacuolar proton atpases [Aedes aegypti] >gi|108869446|gb|EAT33671.1| vacuolar proton atpases [Aedes aegypti]	1.302	Up	0.00277	95.927
dme04142 Lysosome - Drosophila melanogaster (fruit fly)	4.74315e-05	Unigene16122_All	229 2535 minus strand PREDICTED: similar to saposin isoform 1 [Tribolium castaneum]	1.255	Up	0.0236	86.508
dme04142 Lysosome - Drosophila melanogaster (fruit fly)	4.74315e-05	Unigene16075_All	173 1174 minus strand cathepsin L-like cysteine protease 2 [Plautia stali]	1.206	Up	0.0277	37.586
dme04142 Lysosome - Drosophila melanogaster (fruit fly)	4.74315e-05	Unigene9867_All	110 1279 minus strand aspartate protease cathepsin D [Triatoma infestans]	1.498	Up	0.00556	42.518
dme04142 Lysosome - Drosophila melanogaster (fruit fly)	4.74315e-05	Unigene12628_All	162 1289 PREDICTED: similar to phosphatidylcholine-sterol acyltransferase (lecithin-cholesterol acyltransferase) [Tribolium castaneum]	1.325	Up	0.0165	42.257
dme04142 Lysosome - Drosophila melanogaster (fruit fly)	4.74315e-05	Unigene18171_All	96 1094 minus strand cathepsin b [Aedes aegypti] >gi|54289254|gb|AAV31917.1| lysosomal cathepsin B [Aedes aegypti] >gi|108874249|gb|EAT38474.1| cathepsin b [Aedes aegypti]	1.594	Up	0.0212	36.55
dme04142 Lysosome - Drosophila melanogaster (fruit fly)	4.74315e-05	Unigene18202_All	160 1980 minus strand PREDICTED: beta-galactosidase-like [Acyrthosiphon pisum]	1.340	Up	0.0184	68.82
dme04142 Lysosome - Drosophila melanogaster (fruit fly)	4.74315e-05	Unigene14708_All	4 1056 minus strand PREDICTED: prostatic acid phosphatase-like [Apis mellifera]	1.346	Up	0.0166	40.408
dme04142 Lysosome - Drosophila melanogaster (fruit fly)	4.74315e-05	Unigene6543_All	67 519 minus strand PREDICTED: similar to GA16304-PA [Tribolium castaneum]	1.594	Up	0.00868	16.377
dme04142 Lysosome - Drosophila melanogaster (fruit fly)	4.74315e-05	Unigene18227_All	88 1020 lysosomal membrane glycoprotein [Triatoma matogrossensis]	1.272	Up	0.0103	33.646
dme04142 Lysosome - Drosophila melanogaster (fruit fly)	4.74315e-05	CL3486.Contig2_All	72 746 Tetraspanin-9 [Harpegnathos saltator]	1.204	Up	0.0181	24.667
dme00900 Terpenoid backbone biosynthesis - Drosophila melanogaster (fruit fly)	0.466273	Unigene10007_All	72 1046 minus strand Protein farnesyltransferase/geranylgeranyltransferase type-1 subunit alpha [Harpegnathos saltator]	1.299	Up	0.00355	38.503
dme00900 Terpenoid backbone biosynthesis - Drosophila melanogaster (fruit fly)	0.466273	Unigene7753_All	264 1391 minus strand farnesyltransferase beta subunit [Danaus plexippus]	1.347	Up	0.0194	42.744
dme04213 Longevity regulating pathway - multiple species - Drosophila melanogaster (fruit fly)	0.675444	Unigene14958_All	206 616 Cu/Zn superoxide dismutase [Cavia porcellus]	1.323	Up	0.0123	14.147
dme04213 Longevity regulating pathway - multiple species - Drosophila melanogaster (fruit fly)	0.675444	Unigene15941_All	95 508 minus strand PREDICTED: eukaryotic translation initiation factor 4E-binding protein 1-like [Apis mellifera]	1.537	Up	0.0226	15.152
dme04745 Phototransduction - fly - Drosophila melanogaster (fruit fly)	0.0554855	CL1716.Contig1_All	207 1253 minus strand calcium/calmodulin-dependent protein kinase II isoform A [Periplaneta americana]	1.228	Up	0.0162	39.262
dme04745 Phototransduction - fly - Drosophila melanogaster (fruit fly)	0.0554855	CL3401.Contig1_All	"112 1239 actin related protein 1 [Acyrthosiphon pisum] >gi|242011914|ref|XP_002426688.1| Actin, muscle [Pediculus humanus corporis] >gi|77158630|gb|ABA62321.1| beta-actin [Reticulitermes flavipes] >gi|212510859|gb|EEB13950.1| Actin, muscle [Pediculus humanus corporis]"	1.209	Up	0.0157	41.785
dme04745 Phototransduction - fly - Drosophila melanogaster (fruit fly)	0.0554855	Unigene2153_All	3 2522 minus strand PREDICTED: neither inactivation nor afterpotential protein C [Nasonia vitripennis]	1.594	Up	2.09e-05	97.239
dme00564 Glycerophospholipid metabolism - Drosophila melanogaster (fruit fly)	0.675444	Unigene12628_All	162 1289 PREDICTED: similar to phosphatidylcholine-sterol acyltransferase (lecithin-cholesterol acyltransferase) [Tribolium castaneum]	1.325	Up	0.0165	42.257
dme00564 Glycerophospholipid metabolism - Drosophila melanogaster (fruit fly)	0.675444	Unigene16743_All	1 1173 PREDICTED: similar to phospholipase D3 [Tribolium castaneum]	1.248	Up	0.0153	44.304
dme00230 Purine metabolism - Drosophila melanogaster (fruit fly)	0.434876	Unigene8465_All	23 1945 minus strand PREDICTED: aldehyde oxidase-like [Bombus terrestris]	1.583	Up	0.00291	71.07
dme00230 Purine metabolism - Drosophila melanogaster (fruit fly)	0.434876	Unigene10540_All	49 1608 79 kDa salivary apyrase precursor [Triatoma infestans]	1.353	Up	0.0176	57.061
dme00230 Purine metabolism - Drosophila melanogaster (fruit fly)	0.434876	Unigene8718_All	"118 1773 PREDICTED: cAMP-specific 3',5'-cyclic phosphodiesterase [Apis mellifera]"	1.426	Up	0.0121	62.35
dme00230 Purine metabolism - Drosophila melanogaster (fruit fly)	0.434876	Unigene14482_All	89 445 minus strand Putative transthyretin-like protein ZK697.8 [Camponotus floridanus]	1.259	Up	0.0236	13.583
dme00980 Metabolism of xenobiotics by cytochrome P450 - Drosophila melanogaster (fruit fly)	0.574088	Unigene18246_All	161 760 glutathione S-transferase-like [Acyrthosiphon pisum] >gi|239790948|dbj|BAH72002.1| ACYPI002679 [Acyrthosiphon pisum]	1.518	Up	0.0396	24.096
dme00980 Metabolism of xenobiotics by cytochrome P450 - Drosophila melanogaster (fruit fly)	0.574088	CL4438.Contig1_All	81 1598 minus strand PREDICTED: UDP-glucuronosyltransferase 2C1-like [Acyrthosiphon pisum]	1.331	Up	0.0107	57.85
dme00052 Galactose metabolism - Drosophila melanogaster (fruit fly)	0.0467617	Unigene9980_All	96 1034 minus strand PREDICTED: similar to CG6084 CG6084-PA [Tribolium castaneum]	1.308	Up	0.00448	35.758
dme00052 Galactose metabolism - Drosophila melanogaster (fruit fly)	0.0467617	Unigene18282_All	400 1320 PREDICTED: similar to CG6084 CG6084-PA [Tribolium castaneum]	1.300	Up	0.00649	34.703
dme00052 Galactose metabolism - Drosophila melanogaster (fruit fly)	0.0467617	CL3759.Contig2_All	186 1679 UDP-glucose pyrophosphorylase [Spodoptera exigua]	1.255	Up	0.0173	56.345
dme00052 Galactose metabolism - Drosophila melanogaster (fruit fly)	0.0467617	Unigene18202_All	160 1980 minus strand PREDICTED: beta-galactosidase-like [Acyrthosiphon pisum]	1.340	Up	0.0184	68.82
dme00500 Starch and sucrose metabolism - Drosophila melanogaster (fruit fly)	0.2163	Unigene15055_All	86 1510 minus strand glycogenin [Culex quinquefasciatus] >gi|167876468|gb|EDS39851.1| glycogenin [Culex quinquefasciatus]	1.225	Up	0.00432	51.255
dme00500 Starch and sucrose metabolism - Drosophila melanogaster (fruit fly)	0.2163	Unigene9907_All	58 1437 alpha-amylase [Blattella germanica]	1.390	Up	0.0166	51.817
dme00500 Starch and sucrose metabolism - Drosophila melanogaster (fruit fly)	0.2163	CL3759.Contig2_All	186 1679 UDP-glucose pyrophosphorylase [Spodoptera exigua]	1.255	Up	0.0173	56.345
dme00561 Glycerolipid metabolism - Drosophila melanogaster (fruit fly)	0.610929	Unigene9980_All	96 1034 minus strand PREDICTED: similar to CG6084 CG6084-PA [Tribolium castaneum]	1.308	Up	0.00448	35.758
dme00561 Glycerolipid metabolism - Drosophila melanogaster (fruit fly)	0.610929	Unigene18282_All	400 1320 PREDICTED: similar to CG6084 CG6084-PA [Tribolium castaneum]	1.300	Up	0.00649	34.703
dme04214 Apoptosis - fly - Drosophila melanogaster (fruit fly)	0.610929	Unigene1520_All	119 1906 minus strand PREDICTED: lamin Dm0-like isoform 1 [Nasonia vitripennis]	1.201	Up	0.0119	68.673
dme04214 Apoptosis - fly - Drosophila melanogaster (fruit fly)	0.610929	Unigene13791_All	262 750 GA15462 [Drosophila pseudoobscura pseudoobscura] >gi|198138087|gb|EAL33487.2| GA15462 [Drosophila pseudoobscura pseudoobscura]	1.423	Up	0.0175	17.798
