# Supplementary material for: Differential Proteomics Analysis Unraveled Mechanisms of Arma chinensis Responding to Improved Artificial Diet
Source: Insects. 2022 Jul 2;13(7):605. doi: 10.3390/insects13070605 (PMC9319121; doi:10.3390/insects13070605)
Supplement: Supplementary file 1 [file insects-13-00605-s001.zip › Supplementary Table S11.xlsx]

## Sheet: Down Pathway2Protein
Table S11. KEGG pathway enrichment analysis for the down-regulated DEPs in IADA/COSMA.
KEGG pathway	Fisher's exact test p value	Protein accession	Protein description	IADA/COSMA Ratio	Regulated Type	IADA/COSMA P value	MW [kDa]
dme00030 Pentose phosphate pathway - Drosophila melanogaster (fruit fly)	0.00720501	Unigene7773_All	"360 1340 minus strand PREDICTED: fructose-1,6-bisphosphatase 1-like isoform 2 [Acyrthosiphon pisum]"	0.782	Down	0.00708	35.673
dme00030 Pentose phosphate pathway - Drosophila melanogaster (fruit fly)	0.00720501	Unigene18208_All	"134 1579 minus strand 6-phosphogluconate dehydrogenase, decarboxylating [Acromyrmex echinatior]"	0.790	Down	0.00187	52.8
dme00030 Pentose phosphate pathway - Drosophila melanogaster (fruit fly)	0.00720501	Unigene14014_All	"90 1181 fructose 1,6-bisphosphate aldolase [Schistocerca gregaria]"	0.831	Down	0.00275	39.841
dme00030 Pentose phosphate pathway - Drosophila melanogaster (fruit fly)	0.00720501	Unigene13998_All	168 1145 minus strand transaldolase [Aedes aegypti] >gi|108874520|gb|EAT38745.1| transaldolase [Aedes aegypti]	0.751	Down	0.00357	36.463
dme04213 Longevity regulating pathway - multiple species - Drosophila melanogaster (fruit fly)	0.122492	CL5444.Contig2_All	154 690 minus strand small heat shock protein [Trialeurodes vaporariorum]	0.663	Down	0.0238	20.255
dme04213 Longevity regulating pathway - multiple species - Drosophila melanogaster (fruit fly)	0.122492	Unigene17996_All	185 778 minus strand Mn superoxide dismutase [Bombyx mori] >gi|52421187|dbj|BAD51413.1| Mn superoxide dismutase [Bombyx mori] >gi|58429979|gb|AAW78358.1| Mn superoxide dismutase [Bombyx mori]	0.793	Down	0.0311	22.389
dme04213 Longevity regulating pathway - multiple species - Drosophila melanogaster (fruit fly)	0.122492	CL1793.Contig1_All	330 818 minus strand heat shock protein 20.7 [Schistocerca gregaria]	0.403	Down	0.00509	18.188
dme00071 Fatty acid degradation - Drosophila melanogaster (fruit fly)	0.449808	Unigene20022_All	2 574 minus strand PREDICTED: similar to AGAP006821-PA [Tribolium castaneum]	0.800	Down	0.0155	19.686
dme00071 Fatty acid degradation - Drosophila melanogaster (fruit fly)	0.449808	Unigene5698_All	149 1282 minus strand PREDICTED: alcohol dehydrogenase class-3 [Apis mellifera]	0.778	Down	0.0225	40.6
dme00480 Glutathione metabolism - Drosophila melanogaster (fruit fly)	0.550112	Unigene18208_All	"134 1579 minus strand 6-phosphogluconate dehydrogenase, decarboxylating [Acromyrmex echinatior]"	0.790	Down	0.00187	52.8
dme00480 Glutathione metabolism - Drosophila melanogaster (fruit fly)	0.550112	Unigene9992_All	63 908 minus strand PREDICTED: spermidine synthase [Apis mellifera]	0.522	Down	0.000212	31.724
dme01100 Metabolic pathways - Drosophila melanogaster (fruit fly)	0.000668762	Unigene12651_All	"199 2463 PREDICTED: alpha,alpha-trehalose-phosphate synthase [UDP-forming] A-like [Acyrthosiphon pisum]"	0.819	Down	0.0358	85.385
dme01100 Metabolic pathways - Drosophila melanogaster (fruit fly)	0.000668762	Unigene9915_All	"121 1416 RecName: Full=Enolase; AltName: Full=2-phospho-D-glycerate hydro-lyase; AltName: Full=2-phosphoglycerate dehydratase >gi|157833457|pdb|1PDY|A Chain A, X-Ray Structure And Catalytic Mechanism Of Lobster Enolase >gi|157833458|pdb|1PDZ|A Chain A, X-Ray Structure And Catalytic Mechanism Of Lobster Enolase"	0.780	Down	0.002	46.625
dme01100 Metabolic pathways - Drosophila melanogaster (fruit fly)	0.000668762	Unigene20231_All	119 1384 Threonine dehydratase catabolic [Harpegnathos saltator]	0.652	Down	0.00741	45.437
dme01100 Metabolic pathways - Drosophila melanogaster (fruit fly)	0.000668762	Unigene13998_All	168 1145 minus strand transaldolase [Aedes aegypti] >gi|108874520|gb|EAT38745.1| transaldolase [Aedes aegypti]	0.751	Down	0.00357	36.463
dme01100 Metabolic pathways - Drosophila melanogaster (fruit fly)	0.000668762	Unigene9881_All	180 1940 PREDICTED: similar to 5-aminoimidazole-4-carboxamide ribonucleotide formyltransferase/IMP cyclohydrolase [Tribolium castaneum]	0.793	Down	0.00606	64.036
dme01100 Metabolic pathways - Drosophila melanogaster (fruit fly)	0.000668762	Unigene2280_All	5 1354 minus strand Mannosyl-oligosaccharide glucosidase [Harpegnathos saltator]	0.797	Down	0.012	51.781
dme01100 Metabolic pathways - Drosophila melanogaster (fruit fly)	0.000668762	Unigene3655_All	197 955 minus strand PREDICTED: 1-acyl-sn-glycerol-3-phosphate acyltransferase alpha-like isoform 2 [Acyrthosiphon pisum] >gi|328705891|ref|XP_001950878.2| PREDICTED: 1-acyl-sn-glycerol-3-phosphate acyltransferase alpha-like isoform 1 [Acyrthosiphon pisum]	0.625	Down	0.012	28.987
dme01100 Metabolic pathways - Drosophila melanogaster (fruit fly)	0.000668762	Unigene4655_All	95 667 minus strand PREDICTED: peptide O-xylosyltransferase-like [Saccoglossus kowalevskii]	0.630	Down	0.00319	21.783
dme01100 Metabolic pathways - Drosophila melanogaster (fruit fly)	0.000668762	Unigene18230_All	103 672 PREDICTED: similar to F38B2.4 [Tribolium castaneum]	0.759	Down	0.0176	21.02
dme01100 Metabolic pathways - Drosophila melanogaster (fruit fly)	0.000668762	Unigene15092_All	217 1584 hydroxymethylglutaryl-CoA synthase 1 [Culex quinquefasciatus] >gi|167868813|gb|EDS32196.1| hydroxymethylglutaryl-CoA synthase 1 [Culex quinquefasciatus]	0.707	Down	0.00763	50.213
dme01100 Metabolic pathways - Drosophila melanogaster (fruit fly)	0.000668762	Unigene5808_All	139 1080 minus strand PREDICTED: similar to homocysteine S-methyltransferase [Tribolium castaneum]	0.603	Down	0.00852	35.735
dme01100 Metabolic pathways - Drosophila melanogaster (fruit fly)	0.000668762	Unigene5625_All	80 499 PREDICTED: similar to AGAP008653-PA [Tribolium castaneum]	0.801	Down	0.0058	16.666
dme01100 Metabolic pathways - Drosophila melanogaster (fruit fly)	0.000668762	Unigene18208_All	"134 1579 minus strand 6-phosphogluconate dehydrogenase, decarboxylating [Acromyrmex echinatior]"	0.790	Down	0.00187	52.8
dme01100 Metabolic pathways - Drosophila melanogaster (fruit fly)	0.000668762	Unigene7773_All	"360 1340 minus strand PREDICTED: fructose-1,6-bisphosphatase 1-like isoform 2 [Acyrthosiphon pisum]"	0.782	Down	0.00708	35.673
dme01100 Metabolic pathways - Drosophila melanogaster (fruit fly)	0.000668762	Unigene9992_All	63 908 minus strand PREDICTED: spermidine synthase [Apis mellifera]	0.522	Down	0.000212	31.724
dme01100 Metabolic pathways - Drosophila melanogaster (fruit fly)	0.000668762	Unigene14014_All	"90 1181 fructose 1,6-bisphosphate aldolase [Schistocerca gregaria]"	0.831	Down	0.00275	39.841
dme01100 Metabolic pathways - Drosophila melanogaster (fruit fly)	0.000668762	CL217.Contig1_All	166 1077 AGAP012261-PA [Anopheles gambiae str. PEST] >gi|55234400|gb|EAA00282.3| AGAP012261-PA [Anopheles gambiae str. PEST]	0.824	Down	0.0427	34.022
dme01100 Metabolic pathways - Drosophila melanogaster (fruit fly)	0.000668762	Unigene7763_All	113 1108 Gapdh2 [Drosophila pseudoobscura pseudoobscura] >gi|115312169|sp|O44104.2|G3P2_DROPS RecName: Full=Glyceraldehyde-3-phosphate dehydrogenase 2; AltName: Full=Glyceraldehyde-3-phosphate dehydrogenase II; Short=GAPDH II >gi|54640108|gb|EAL29271.1| Gapdh2 [Drosophila pseudoobscura pseudoobscura]	0.731	Down	0.00297	35.654
dme01100 Metabolic pathways - Drosophila melanogaster (fruit fly)	0.000668762	Unigene20022_All	2 574 minus strand PREDICTED: similar to AGAP006821-PA [Tribolium castaneum]	0.800	Down	0.0155	19.686
dme01100 Metabolic pathways - Drosophila melanogaster (fruit fly)	0.000668762	Unigene7760_All	55 1284 minus strand Mannose-6-phosphate isomerase [Acromyrmex echinatior]	0.796	Down	0.00446	46.843
dme01100 Metabolic pathways - Drosophila melanogaster (fruit fly)	0.000668762	Unigene20298_All	114 842 L-xylulose reductase [Anoplopoma fimbria]	0.831	Down	0.0132	26.234
dme01100 Metabolic pathways - Drosophila melanogaster (fruit fly)	0.000668762	Unigene4562_All	20 2536 minus strand PREDICTED: LOW QUALITY PROTEIN: glycogen phosphorylase-like [Nasonia vitripennis]	0.619	Down	0.00135	96.669
dme01100 Metabolic pathways - Drosophila melanogaster (fruit fly)	0.000668762	Unigene5698_All	149 1282 minus strand PREDICTED: alcohol dehydrogenase class-3 [Apis mellifera]	0.778	Down	0.0225	40.6
dme01100 Metabolic pathways - Drosophila melanogaster (fruit fly)	0.000668762	CL355.Contig1_All	3 3932 PREDICTED: fatty acid synthase-like isoform 1 [Acyrthosiphon pisum]	0.662	Down	0.00132	144.71
dme04146 Peroxisome - Drosophila melanogaster (fruit fly)	0.282744	Unigene5748_All	"243 1058 minus strand Delta(3,5)-Delta(2,4)-dienoyl-CoA isomerase, mitochondrial [Harpegnathos saltator]"	0.773	Down	0.0142	29.971
dme04146 Peroxisome - Drosophila melanogaster (fruit fly)	0.282744	Unigene8728_All	188 1714 GD25529 [Drosophila simulans] >gi|194193807|gb|EDX07383.1| GD25529 [Drosophila simulans]	0.739	Down	0.000877	56.923
dme04146 Peroxisome - Drosophila melanogaster (fruit fly)	0.282744	Unigene17996_All	185 778 minus strand Mn superoxide dismutase [Bombyx mori] >gi|52421187|dbj|BAD51413.1| Mn superoxide dismutase [Bombyx mori] >gi|58429979|gb|AAW78358.1| Mn superoxide dismutase [Bombyx mori]	0.793	Down	0.0311	22.389
dme00051 Fructose and mannose metabolism - Drosophila melanogaster (fruit fly)	0.0694294	Unigene7773_All	"360 1340 minus strand PREDICTED: fructose-1,6-bisphosphatase 1-like isoform 2 [Acyrthosiphon pisum]"	0.782	Down	0.00708	35.673
dme00051 Fructose and mannose metabolism - Drosophila melanogaster (fruit fly)	0.0694294	Unigene7760_All	55 1284 minus strand Mannose-6-phosphate isomerase [Acromyrmex echinatior]	0.796	Down	0.00446	46.843
dme00051 Fructose and mannose metabolism - Drosophila melanogaster (fruit fly)	0.0694294	Unigene14014_All	"90 1181 fructose 1,6-bisphosphate aldolase [Schistocerca gregaria]"	0.831	Down	0.00275	39.841
dme00520 Amino sugar and nucleotide sugar metabolism - Drosophila melanogaster (fruit fly)	0.572261	Unigene7760_All	55 1284 minus strand Mannose-6-phosphate isomerase [Acromyrmex echinatior]	0.796	Down	0.00446	46.843
dme00520 Amino sugar and nucleotide sugar metabolism - Drosophila melanogaster (fruit fly)	0.572261	CL217.Contig1_All	166 1077 AGAP012261-PA [Anopheles gambiae str. PEST] >gi|55234400|gb|EAA00282.3| AGAP012261-PA [Anopheles gambiae str. PEST]	0.824	Down	0.0427	34.022
dme04141 Protein processing in endoplasmic reticulum - Drosophila melanogaster (fruit fly)	0.173	CL1996.Contig1_All	189 872 minus strand PREDICTED: endoplasmic reticulum resident protein 29-like [Acyrthosiphon pisum]	0.588	Down	0.0125	25.827
dme04141 Protein processing in endoplasmic reticulum - Drosophila melanogaster (fruit fly)	0.173	CL5444.Contig2_All	154 690 minus strand small heat shock protein [Trialeurodes vaporariorum]	0.663	Down	0.0238	20.255
dme04141 Protein processing in endoplasmic reticulum - Drosophila melanogaster (fruit fly)	0.173	Unigene9891_All	106 2436 endoplasmin [Locusta migratoria]	0.832	Down	0.00286	88.485
dme04141 Protein processing in endoplasmic reticulum - Drosophila melanogaster (fruit fly)	0.173	Unigene2280_All	5 1354 minus strand Mannosyl-oligosaccharide glucosidase [Harpegnathos saltator]	0.797	Down	0.012	51.781
dme04141 Protein processing in endoplasmic reticulum - Drosophila melanogaster (fruit fly)	0.173	CL1793.Contig1_All	330 818 minus strand heat shock protein 20.7 [Schistocerca gregaria]	0.403	Down	0.00509	18.188
dme01200 Carbon metabolism - Drosophila melanogaster (fruit fly)	0.00146197	Unigene7773_All	"360 1340 minus strand PREDICTED: fructose-1,6-bisphosphatase 1-like isoform 2 [Acyrthosiphon pisum]"	0.782	Down	0.00708	35.673
dme01200 Carbon metabolism - Drosophila melanogaster (fruit fly)	0.00146197	Unigene18208_All	"134 1579 minus strand 6-phosphogluconate dehydrogenase, decarboxylating [Acromyrmex echinatior]"	0.790	Down	0.00187	52.8
dme01200 Carbon metabolism - Drosophila melanogaster (fruit fly)	0.00146197	Unigene9915_All	"121 1416 RecName: Full=Enolase; AltName: Full=2-phospho-D-glycerate hydro-lyase; AltName: Full=2-phosphoglycerate dehydratase >gi|157833457|pdb|1PDY|A Chain A, X-Ray Structure And Catalytic Mechanism Of Lobster Enolase >gi|157833458|pdb|1PDZ|A Chain A, X-Ray Structure And Catalytic Mechanism Of Lobster Enolase"	0.780	Down	0.002	46.625
dme01200 Carbon metabolism - Drosophila melanogaster (fruit fly)	0.00146197	Unigene20231_All	119 1384 Threonine dehydratase catabolic [Harpegnathos saltator]	0.652	Down	0.00741	45.437
dme01200 Carbon metabolism - Drosophila melanogaster (fruit fly)	0.00146197	Unigene14014_All	"90 1181 fructose 1,6-bisphosphate aldolase [Schistocerca gregaria]"	0.831	Down	0.00275	39.841
dme01200 Carbon metabolism - Drosophila melanogaster (fruit fly)	0.00146197	Unigene5698_All	149 1282 minus strand PREDICTED: alcohol dehydrogenase class-3 [Apis mellifera]	0.778	Down	0.0225	40.6
dme01200 Carbon metabolism - Drosophila melanogaster (fruit fly)	0.00146197	Unigene13998_All	168 1145 minus strand transaldolase [Aedes aegypti] >gi|108874520|gb|EAT38745.1| transaldolase [Aedes aegypti]	0.751	Down	0.00357	36.463
dme01200 Carbon metabolism - Drosophila melanogaster (fruit fly)	0.00146197	Unigene7763_All	113 1108 Gapdh2 [Drosophila pseudoobscura pseudoobscura] >gi|115312169|sp|O44104.2|G3P2_DROPS RecName: Full=Glyceraldehyde-3-phosphate dehydrogenase 2; AltName: Full=Glyceraldehyde-3-phosphate dehydrogenase II; Short=GAPDH II >gi|54640108|gb|EAL29271.1| Gapdh2 [Drosophila pseudoobscura pseudoobscura]	0.731	Down	0.00297	35.654
dme00564 Glycerophospholipid metabolism - Drosophila melanogaster (fruit fly)	0.463446	Unigene2273_All	"147 1178 minus strand PREDICTED: glycerol-3-phosphate dehydrogenase [NAD+], cytoplasmic-like [Bombus impatiens]"	0.498	Down	0.00046	37.841
dme00564 Glycerophospholipid metabolism - Drosophila melanogaster (fruit fly)	0.463446	Unigene3655_All	197 955 minus strand PREDICTED: 1-acyl-sn-glycerol-3-phosphate acyltransferase alpha-like isoform 2 [Acyrthosiphon pisum] >gi|328705891|ref|XP_001950878.2| PREDICTED: 1-acyl-sn-glycerol-3-phosphate acyltransferase alpha-like isoform 1 [Acyrthosiphon pisum]	0.625	Down	0.012	28.987
dme00270 Cysteine and methionine metabolism - Drosophila melanogaster (fruit fly)	0.489742	Unigene9992_All	63 908 minus strand PREDICTED: spermidine synthase [Apis mellifera]	0.522	Down	0.000212	31.724
dme00270 Cysteine and methionine metabolism - Drosophila melanogaster (fruit fly)	0.489742	Unigene5808_All	139 1080 minus strand PREDICTED: similar to homocysteine S-methyltransferase [Tribolium castaneum]	0.603	Down	0.00852	35.735
dme00280 Valine, leucine and isoleucine degradation - Drosophila melanogaster (fruit fly)	0.582933	Unigene20022_All	2 574 minus strand PREDICTED: similar to AGAP006821-PA [Tribolium castaneum]	0.800	Down	0.0155	19.686
dme00280 Valine, leucine and isoleucine degradation - Drosophila melanogaster (fruit fly)	0.582933	Unigene15092_All	217 1584 hydroxymethylglutaryl-CoA synthase 1 [Culex quinquefasciatus] >gi|167868813|gb|EDS32196.1| hydroxymethylglutaryl-CoA synthase 1 [Culex quinquefasciatus]	0.707	Down	0.00763	50.213
dme01230 Biosynthesis of amino acids - Drosophila melanogaster (fruit fly)	0.0203362	Unigene9915_All	"121 1416 RecName: Full=Enolase; AltName: Full=2-phospho-D-glycerate hydro-lyase; AltName: Full=2-phosphoglycerate dehydratase >gi|157833457|pdb|1PDY|A Chain A, X-Ray Structure And Catalytic Mechanism Of Lobster Enolase >gi|157833458|pdb|1PDZ|A Chain A, X-Ray Structure And Catalytic Mechanism Of Lobster Enolase"	0.780	Down	0.002	46.625
dme01230 Biosynthesis of amino acids - Drosophila melanogaster (fruit fly)	0.0203362	Unigene20231_All	119 1384 Threonine dehydratase catabolic [Harpegnathos saltator]	0.652	Down	0.00741	45.437
dme01230 Biosynthesis of amino acids - Drosophila melanogaster (fruit fly)	0.0203362	Unigene14014_All	"90 1181 fructose 1,6-bisphosphate aldolase [Schistocerca gregaria]"	0.831	Down	0.00275	39.841
dme01230 Biosynthesis of amino acids - Drosophila melanogaster (fruit fly)	0.0203362	Unigene13998_All	168 1145 minus strand transaldolase [Aedes aegypti] >gi|108874520|gb|EAT38745.1| transaldolase [Aedes aegypti]	0.751	Down	0.00357	36.463
dme01230 Biosynthesis of amino acids - Drosophila melanogaster (fruit fly)	0.0203362	Unigene7763_All	113 1108 Gapdh2 [Drosophila pseudoobscura pseudoobscura] >gi|115312169|sp|O44104.2|G3P2_DROPS RecName: Full=Glyceraldehyde-3-phosphate dehydrogenase 2; AltName: Full=Glyceraldehyde-3-phosphate dehydrogenase II; Short=GAPDH II >gi|54640108|gb|EAL29271.1| Gapdh2 [Drosophila pseudoobscura pseudoobscura]	0.731	Down	0.00297	35.654
dme00010 Glycolysis / Gluconeogenesis - Drosophila melanogaster (fruit fly)	0.0101493	Unigene7773_All	"360 1340 minus strand PREDICTED: fructose-1,6-bisphosphatase 1-like isoform 2 [Acyrthosiphon pisum]"	0.782	Down	0.00708	35.673
dme00010 Glycolysis / Gluconeogenesis - Drosophila melanogaster (fruit fly)	0.0101493	Unigene9915_All	"121 1416 RecName: Full=Enolase; AltName: Full=2-phospho-D-glycerate hydro-lyase; AltName: Full=2-phosphoglycerate dehydratase >gi|157833457|pdb|1PDY|A Chain A, X-Ray Structure And Catalytic Mechanism Of Lobster Enolase >gi|157833458|pdb|1PDZ|A Chain A, X-Ray Structure And Catalytic Mechanism Of Lobster Enolase"	0.780	Down	0.002	46.625
dme00010 Glycolysis / Gluconeogenesis - Drosophila melanogaster (fruit fly)	0.0101493	Unigene14014_All	"90 1181 fructose 1,6-bisphosphate aldolase [Schistocerca gregaria]"	0.831	Down	0.00275	39.841
dme00010 Glycolysis / Gluconeogenesis - Drosophila melanogaster (fruit fly)	0.0101493	Unigene5698_All	149 1282 minus strand PREDICTED: alcohol dehydrogenase class-3 [Apis mellifera]	0.778	Down	0.0225	40.6
dme00010 Glycolysis / Gluconeogenesis - Drosophila melanogaster (fruit fly)	0.0101493	Unigene7763_All	113 1108 Gapdh2 [Drosophila pseudoobscura pseudoobscura] >gi|115312169|sp|O44104.2|G3P2_DROPS RecName: Full=Glyceraldehyde-3-phosphate dehydrogenase 2; AltName: Full=Glyceraldehyde-3-phosphate dehydrogenase II; Short=GAPDH II >gi|54640108|gb|EAL29271.1| Gapdh2 [Drosophila pseudoobscura pseudoobscura]	0.731	Down	0.00297	35.654
dme00500 Starch and sucrose metabolism - Drosophila melanogaster (fruit fly)	0.3918	Unigene12651_All	"199 2463 PREDICTED: alpha,alpha-trehalose-phosphate synthase [UDP-forming] A-like [Acyrthosiphon pisum]"	0.819	Down	0.0358	85.385
dme00500 Starch and sucrose metabolism - Drosophila melanogaster (fruit fly)	0.3918	Unigene4562_All	20 2536 minus strand PREDICTED: LOW QUALITY PROTEIN: glycogen phosphorylase-like [Nasonia vitripennis]	0.619	Down	0.00135	96.669
dme00561 Glycerolipid metabolism - Drosophila melanogaster (fruit fly)	0.406837	Unigene15050_All	184 1194 2-acylglycerol O-acyltransferase 1 [Harpegnathos saltator]	0.742	Down	0.00273	38.394
dme00561 Glycerolipid metabolism - Drosophila melanogaster (fruit fly)	0.406837	Unigene3655_All	197 955 minus strand PREDICTED: 1-acyl-sn-glycerol-3-phosphate acyltransferase alpha-like isoform 2 [Acyrthosiphon pisum] >gi|328705891|ref|XP_001950878.2| PREDICTED: 1-acyl-sn-glycerol-3-phosphate acyltransferase alpha-like isoform 1 [Acyrthosiphon pisum]	0.625	Down	0.012	28.987
dme01212 Fatty acid metabolism - Drosophila melanogaster (fruit fly)	0.16484	Unigene20022_All	2 574 minus strand PREDICTED: similar to AGAP006821-PA [Tribolium castaneum]	0.800	Down	0.0155	19.686
dme01212 Fatty acid metabolism - Drosophila melanogaster (fruit fly)	0.16484	Unigene1450_All	64 984 stearoyl-coa desaturase [Aedes aegypti] >gi|108880849|gb|EAT45074.1| stearoyl-coa desaturase [Aedes aegypti]	0.766	Down	0.0441	34.976
dme01212 Fatty acid metabolism - Drosophila melanogaster (fruit fly)	0.16484	CL355.Contig1_All	3 3932 PREDICTED: fatty acid synthase-like isoform 1 [Acyrthosiphon pisum]	0.662	Down	0.00132	144.71
dme00981 Insect hormone biosynthesis - Drosophila melanogaster (fruit fly)	0.0438881	Unigene10287_All	112 864 juvenile hormone acid methyltransferase [Schistocerca gregaria]	0.645	Down	0.0111	29.032
dme00981 Insect hormone biosynthesis - Drosophila melanogaster (fruit fly)	0.0438881	Unigene6419_All	65 1402 minus strand PREDICTED: similar to juvenile hormone epoxide hydrolase [Tribolium castaneum]	0.694	Down	0.0363	51.222
dme00981 Insect hormone biosynthesis - Drosophila melanogaster (fruit fly)	0.0438881	CL408.Contig4_All	40 789 minus strand juvenile hormone acid methyltransferase [Schistocerca gregaria]	0.361	Down	0.0247	29.445
