# Supplementary material for: Differential Proteomics Analysis Unraveled Mechanisms of Arma chinensis Responding to Improved Artificial Diet
Source: Insects. 2022 Jul 2;13(7):605. doi: 10.3390/insects13070605 (PMC9319121; doi:10.3390/insects13070605)
Supplement: Supplementary file 1 [file insects-13-00605-s001.zip › Supplementary Table S12.xlsx]

## Sheet: Up Pathway2Protein
Table S12. KEGG pathway enrichment analysis for the up-regulated DEPs in IADN/COSMN.
KEGG pathway	Fisher's exact test p value	Protein accession	Protein description	IADN/COSMN Ratio	Regulated Type	IADN/COSMN P value	MW [kDa]
dme00053 Ascorbate and aldarate metabolism - Drosophila melanogaster (fruit fly)	0.509888	Unigene7149_All	45 1463 minus strand PREDICTED: UDP-glucose 6-dehydrogenase-like [Bombus terrestris] >gi|350400065|ref|XP_003485726.1| PREDICTED: UDP-glucose 6-dehydrogenase-like [Bombus impatiens]	1.321	Up	0.0228	52.614
dme00053 Ascorbate and aldarate metabolism - Drosophila melanogaster (fruit fly)	0.509888	CL743.Contig3_All	357 1907 PREDICTED: similar to glucosyl/glucuronosyl transferases [Tribolium castaneum]	1.233	Up	0.00839	58.831
dme00380 Tryptophan metabolism - Drosophila melanogaster (fruit fly)	0.203908	Unigene14067_All	66 1544 catalase [Schistocerca gregaria]	1.291	Up	0.0103	55.613
dme00380 Tryptophan metabolism - Drosophila melanogaster (fruit fly)	0.203908	Unigene3580_All	77 1495 minus strand kynurenine aminotransferase [Glossina morsitans morsitans]	1.238	Up	0.0203	53.372
dme00380 Tryptophan metabolism - Drosophila melanogaster (fruit fly)	0.203908	CL2978.Contig2_All	"77 1255 minus strand Acetyl-CoA acetyltransferase, cytosolic [Camponotus floridanus]"	1.237	Up	0.0224	41.525
dme00250 Alanine, aspartate and glutamate metabolism - Drosophila melanogaster (fruit fly)	0.691203	Unigene10512_All	2 3025 minus strand Putative glutamate synthase [NADPH] [Harpegnathos saltator]	1.472	Up	0.000853	109.7
dme00250 Alanine, aspartate and glutamate metabolism - Drosophila melanogaster (fruit fly)	0.691203	CL750.Contig1_All	387 1769 minus strand PREDICTED: similar to 4-aminobutyrate aminotransferase [Tribolium castaneum]	1.772	Up	0.000295	51.43
dme00982 Drug metabolism - cytochrome P450 - Drosophila melanogaster (fruit fly)	0.600719	Unigene18246_All	161 760 glutathione S-transferase-like [Acyrthosiphon pisum] >gi|239790948|dbj|BAH72002.1| ACYPI002679 [Acyrthosiphon pisum]	1.553	Up	0.0179	24.096
dme00982 Drug metabolism - cytochrome P450 - Drosophila melanogaster (fruit fly)	0.600719	CL743.Contig3_All	357 1907 PREDICTED: similar to glucosyl/glucuronosyl transferases [Tribolium castaneum]	1.233	Up	0.00839	58.831
dme00511 Other glycan degradation - Drosophila melanogaster (fruit fly)	0.0839811	Unigene8606_All	3 1280 PREDICTED: non-lysosomal glucosylceramidase-like [Acyrthosiphon pisum]	1.420	Up	0.00135	48.969
dme00511 Other glycan degradation - Drosophila melanogaster (fruit fly)	0.0839811	Unigene18141_All	58 1077 minus strand aspartylglucosaminidase [Bombyx mori] >gi|110645051|gb|ABG81362.1| aspartylglucosaminidase [Bombyx mori]	2.390	Up	0.00323	36.67
dme00511 Other glycan degradation - Drosophila melanogaster (fruit fly)	0.0839811	Unigene18202_All	160 1980 minus strand PREDICTED: beta-galactosidase-like [Acyrthosiphon pisum]	1.951	Up	1.82e-05	68.82
dme00051 Fructose and mannose metabolism - Drosophila melanogaster (fruit fly)	0.222453	Unigene9975_All	57 1100 minus strand sorbitol dehydrogenase [Pyrrhocoris apterus]	1.344	Up	0.000184	37.608
dme00051 Fructose and mannose metabolism - Drosophila melanogaster (fruit fly)	0.222453	Unigene7893_All	127 852 minus strand phosphomannomutase [Schistosoma mansoni] >gi|353233060|emb|CCD80415.1| phosphomannomutase [Schistosoma mansoni]	1.210	Up	0.00429	27.911
dme00051 Fructose and mannose metabolism - Drosophila melanogaster (fruit fly)	0.222453	Unigene18282_All	400 1320 PREDICTED: similar to CG6084 CG6084-PA [Tribolium castaneum]	1.380	Up	1.84e-05	34.703
dme04146 Peroxisome - Drosophila melanogaster (fruit fly)	0.00419706	Unigene14958_All	206 616 Cu/Zn superoxide dismutase [Cavia porcellus]	1.870	Up	0.024	14.147
dme04146 Peroxisome - Drosophila melanogaster (fruit fly)	0.00419706	Unigene14067_All	66 1544 catalase [Schistocerca gregaria]	1.291	Up	0.0103	55.613
dme04146 Peroxisome - Drosophila melanogaster (fruit fly)	0.00419706	Unigene2139_All	163 2151 minus strand PREDICTED: similar to acyl-CoA oxidase [Tribolium castaneum]	1.232	Up	0.000523	75.236
dme04146 Peroxisome - Drosophila melanogaster (fruit fly)	0.00419706	Unigene8465_All	23 1945 minus strand PREDICTED: aldehyde oxidase-like [Bombus terrestris]	2.113	Up	0.00602	71.07
dme04146 Peroxisome - Drosophila melanogaster (fruit fly)	0.00419706	Unigene14646_All	35 4117 minus strand PREDICTED: xanthine dehydrogenase-like [Bombus terrestris]	1.201	Up	0.00947	150.96
dme04146 Peroxisome - Drosophila melanogaster (fruit fly)	0.00419706	Unigene3597_All	587 2269 minus strand 2-hydroxyacyl-CoA lyase 1 [Camponotus floridanus]	1.316	Up	0.00748	60.924
dme04146 Peroxisome - Drosophila melanogaster (fruit fly)	0.00419706	Unigene8543_All	100 2229 PREDICTED: peroxisomal multifunctional enzyme type 2-like isoform 2 [Acyrthosiphon pisum] >gi|328711510|ref|XP_003244559.1| PREDICTED: peroxisomal multifunctional enzyme type 2-like isoform 3 [Acyrthosiphon pisum]	1.254	Up	0.00173	77.229
dme04146 Peroxisome - Drosophila melanogaster (fruit fly)	0.00419706	Unigene11805_All	217 678 superoxide dismutase [Triatoma infestans]	1.311	Up	0.0318	15.832
dme00650 Butanoate metabolism - Drosophila melanogaster (fruit fly)	0.457107	CL750.Contig1_All	387 1769 minus strand PREDICTED: similar to 4-aminobutyrate aminotransferase [Tribolium castaneum]	1.772	Up	0.000295	51.43
dme00650 Butanoate metabolism - Drosophila melanogaster (fruit fly)	0.457107	CL2978.Contig2_All	"77 1255 minus strand Acetyl-CoA acetyltransferase, cytosolic [Camponotus floridanus]"	1.237	Up	0.0224	41.525
dme00983 Drug metabolism - other enzymes - Drosophila melanogaster (fruit fly)	0.00526463	Unigene623_All	2 1021 minus strand PREDICTED: uridine phosphorylase 1-like [Apis mellifera]	1.289	Up	0.00816	38.488
dme00983 Drug metabolism - other enzymes - Drosophila melanogaster (fruit fly)	0.00526463	Unigene8465_All	23 1945 minus strand PREDICTED: aldehyde oxidase-like [Bombus terrestris]	2.113	Up	0.00602	71.07
dme00983 Drug metabolism - other enzymes - Drosophila melanogaster (fruit fly)	0.00526463	CL146.Contig2_All	176 2119 minus strand PREDICTED: beta-glucuronidase-like [Acyrthosiphon pisum]	1.631	Up	0.0248	74.201
dme00983 Drug metabolism - other enzymes - Drosophila melanogaster (fruit fly)	0.00526463	Unigene14646_All	35 4117 minus strand PREDICTED: xanthine dehydrogenase-like [Bombus terrestris]	1.201	Up	0.00947	150.96
dme00983 Drug metabolism - other enzymes - Drosophila melanogaster (fruit fly)	0.00526463	CL595.Contig1_All	22 3018 minus strand PREDICTED: dihydropyrimidine dehydrogenase [NADP+]-like isoform 1 [Apis mellifera]	1.395	Up	0.00185	109.55
dme00983 Drug metabolism - other enzymes - Drosophila melanogaster (fruit fly)	0.00526463	CL743.Contig3_All	357 1907 PREDICTED: similar to glucosyl/glucuronosyl transferases [Tribolium castaneum]	1.233	Up	0.00839	58.831
dme00270 Cysteine and methionine metabolism - Drosophila melanogaster (fruit fly)	0.389481	Unigene15870_All	"163 693 minus strand 1,2-dihydroxy-3-keto-5-methylthiopentene dioxygenase [Camponotus floridanus]"	1.612	Up	0.0179	21.215
dme00270 Cysteine and methionine metabolism - Drosophila melanogaster (fruit fly)	0.389481	CL880.Contig1_All	190 1272 minus strand PREDICTED: adenosylhomocysteinase A-like [Anolis carolinensis]	1.216	Up	0.0144	39.899
dme00270 Cysteine and methionine metabolism - Drosophila melanogaster (fruit fly)	0.389481	Unigene5808_All	139 1080 minus strand PREDICTED: similar to homocysteine S-methyltransferase [Tribolium castaneum]	1.477	Up	0.00219	35.735
dme00350 Tyrosine metabolism - Drosophila melanogaster (fruit fly)	0.534346	CL2199.Contig1_All	107 751 minus strand AGAP002898-PC [Anopheles gambiae str. PEST] >gi|347968788|ref|XP_003436291.1| AGAP002898-PD [Anopheles gambiae str. PEST] >gi|333467833|gb|EGK96714.1| AGAP002898-PC [Anopheles gambiae str. PEST] >gi|333467834|gb|EGK96715.1| AGAP002898-PD [Anopheles gambiae str. PEST]	1.398	Up	0.0322	24.81
dme00350 Tyrosine metabolism - Drosophila melanogaster (fruit fly)	0.534346	CL1943.Contig1_All	22 1164 4-hydroxyphenylpyruvate dioxygenase [Aedes aegypti] >gi|108868917|gb|EAT33142.1| 4-hydroxyphenylpyruvate dioxygenase [Aedes aegypti]	1.999	Up	0.0242	43.722
dme00040 Pentose and glucuronate interconversions - Drosophila melanogaster (fruit fly)	0.00433322	Unigene9975_All	57 1100 minus strand sorbitol dehydrogenase [Pyrrhocoris apterus]	1.344	Up	0.000184	37.608
dme00040 Pentose and glucuronate interconversions - Drosophila melanogaster (fruit fly)	0.00433322	Unigene7149_All	45 1463 minus strand PREDICTED: UDP-glucose 6-dehydrogenase-like [Bombus terrestris] >gi|350400065|ref|XP_003485726.1| PREDICTED: UDP-glucose 6-dehydrogenase-like [Bombus impatiens]	1.321	Up	0.0228	52.614
dme00040 Pentose and glucuronate interconversions - Drosophila melanogaster (fruit fly)	0.00433322	CL146.Contig2_All	176 2119 minus strand PREDICTED: beta-glucuronidase-like [Acyrthosiphon pisum]	1.631	Up	0.0248	74.201
dme00040 Pentose and glucuronate interconversions - Drosophila melanogaster (fruit fly)	0.00433322	CL743.Contig3_All	357 1907 PREDICTED: similar to glucosyl/glucuronosyl transferases [Tribolium castaneum]	1.233	Up	0.00839	58.831
dme00040 Pentose and glucuronate interconversions - Drosophila melanogaster (fruit fly)	0.00433322	Unigene18282_All	400 1320 PREDICTED: similar to CG6084 CG6084-PA [Tribolium castaneum]	1.380	Up	1.84e-05	34.703
dme00040 Pentose and glucuronate interconversions - Drosophila melanogaster (fruit fly)	0.00433322	CL3759.Contig2_All	186 1679 UDP-glucose pyrophosphorylase [Spodoptera exigua]	1.352	Up	0.011	56.345
dme00630 Glyoxylate and dicarboxylate metabolism - Drosophila melanogaster (fruit fly)	0.620696	Unigene14067_All	66 1544 catalase [Schistocerca gregaria]	1.291	Up	0.0103	55.613
dme00630 Glyoxylate and dicarboxylate metabolism - Drosophila melanogaster (fruit fly)	0.620696	CL2978.Contig2_All	"77 1255 minus strand Acetyl-CoA acetyltransferase, cytosolic [Camponotus floridanus]"	1.237	Up	0.0224	41.525
dme01212 Fatty acid metabolism - Drosophila melanogaster (fruit fly)	0.182268	Unigene2139_All	163 2151 minus strand PREDICTED: similar to acyl-CoA oxidase [Tribolium castaneum]	1.232	Up	0.000523	75.236
dme01212 Fatty acid metabolism - Drosophila melanogaster (fruit fly)	0.182268	Unigene18296_All	87 968 PREDICTED: palmitoyl-protein thioesterase 1-like [Acyrthosiphon pisum]	1.664	Up	0.00136	33.699
dme01212 Fatty acid metabolism - Drosophila melanogaster (fruit fly)	0.182268	Unigene1450_All	64 984 stearoyl-coa desaturase [Aedes aegypti] >gi|108880849|gb|EAT45074.1| stearoyl-coa desaturase [Aedes aegypti]	1.281	Up	0.0138	34.976
dme01212 Fatty acid metabolism - Drosophila melanogaster (fruit fly)	0.182268	CL2978.Contig2_All	"77 1255 minus strand Acetyl-CoA acetyltransferase, cytosolic [Camponotus floridanus]"	1.237	Up	0.0224	41.525
dme00330 Arginine and proline metabolism - Drosophila melanogaster (fruit fly)	0.278669	Unigene1610_All	96 899 PREDICTED: similar to GA19292-PA [Tribolium castaneum]	1.232	Up	0.0367	28.416
dme00330 Arginine and proline metabolism - Drosophila melanogaster (fruit fly)	0.278669	CL1926.Contig1_All	280 2487 PREDICTED: delta-1-pyrroline-5-carboxylate synthase-like [Nasonia vitripennis]	1.272	Up	0.00939	79.601
dme00330 Arginine and proline metabolism - Drosophila melanogaster (fruit fly)	0.278669	Unigene1445_All	78 878 minus strand PREDICTED: similar to pyrroline-5-carboxylate reductase [Tribolium castaneum]	1.625	Up	0.0121	28.223
dme04142 Lysosome - Drosophila melanogaster (fruit fly)	0.000142203	Unigene12032_All	67 513 GD23124 [Drosophila simulans] >gi|194189815|gb|EDX03391.1| GD23124 [Drosophila simulans]	1.271	Up	0.000593	16.679
dme04142 Lysosome - Drosophila melanogaster (fruit fly)	0.000142203	Unigene18296_All	87 968 PREDICTED: palmitoyl-protein thioesterase 1-like [Acyrthosiphon pisum]	1.664	Up	0.00136	33.699
dme04142 Lysosome - Drosophila melanogaster (fruit fly)	0.000142203	Unigene20287_All	10 819 PREDICTED: plancitoxin-1-like isoform 1 [Nasonia vitripennis]	1.470	Up	0.0478	30.876
dme04142 Lysosome - Drosophila melanogaster (fruit fly)	0.000142203	Unigene16122_All	229 2535 minus strand PREDICTED: similar to saposin isoform 1 [Tribolium castaneum]	1.286	Up	0.00255	86.508
dme04142 Lysosome - Drosophila melanogaster (fruit fly)	0.000142203	Unigene16075_All	173 1174 minus strand cathepsin L-like cysteine protease 2 [Plautia stali]	1.483	Up	0.00615	37.586
dme04142 Lysosome - Drosophila melanogaster (fruit fly)	0.000142203	Unigene12628_All	162 1289 PREDICTED: similar to phosphatidylcholine-sterol acyltransferase (lecithin-cholesterol acyltransferase) [Tribolium castaneum]	1.363	Up	0.0109	42.257
dme04142 Lysosome - Drosophila melanogaster (fruit fly)	0.000142203	Unigene18171_All	96 1094 minus strand cathepsin b [Aedes aegypti] >gi|54289254|gb|AAV31917.1| lysosomal cathepsin B [Aedes aegypti] >gi|108874249|gb|EAT38474.1| cathepsin b [Aedes aegypti]	1.693	Up	0.00769	36.55
dme04142 Lysosome - Drosophila melanogaster (fruit fly)	0.000142203	Unigene18202_All	160 1980 minus strand PREDICTED: beta-galactosidase-like [Acyrthosiphon pisum]	1.951	Up	1.82e-05	68.82
dme04142 Lysosome - Drosophila melanogaster (fruit fly)	0.000142203	CL146.Contig2_All	176 2119 minus strand PREDICTED: beta-glucuronidase-like [Acyrthosiphon pisum]	1.631	Up	0.0248	74.201
dme04142 Lysosome - Drosophila melanogaster (fruit fly)	0.000142203	Unigene18141_All	58 1077 minus strand aspartylglucosaminidase [Bombyx mori] >gi|110645051|gb|ABG81362.1| aspartylglucosaminidase [Bombyx mori]	2.390	Up	0.00323	36.67
dme04142 Lysosome - Drosophila melanogaster (fruit fly)	0.000142203	Unigene1580_All	90 1082 minus strand cathepsin B [Branchiostoma belcheri tsingtauense]	2.446	Up	0.00759	35.94
dme00310 Lysine degradation - Drosophila melanogaster (fruit fly)	0.620696	CL2049.Contig2_All	17 697 minus strand Histone-lysine N-methyltransferase eggless [Acromyrmex echinatior]	1.361	Up	0.0244	26.065
dme00310 Lysine degradation - Drosophila melanogaster (fruit fly)	0.620696	CL2978.Contig2_All	"77 1255 minus strand Acetyl-CoA acetyltransferase, cytosolic [Camponotus floridanus]"	1.237	Up	0.0224	41.525
dme04213 Longevity regulating pathway - multiple species - Drosophila melanogaster (fruit fly)	0.0316917	Unigene14958_All	206 616 Cu/Zn superoxide dismutase [Cavia porcellus]	1.870	Up	0.024	14.147
dme04213 Longevity regulating pathway - multiple species - Drosophila melanogaster (fruit fly)	0.0316917	Unigene14067_All	66 1544 catalase [Schistocerca gregaria]	1.291	Up	0.0103	55.613
dme04213 Longevity regulating pathway - multiple species - Drosophila melanogaster (fruit fly)	0.0316917	Unigene10845_All	5 4993 target of rapamycin [Blattella germanica]	1.241	Up	0.0249	190.26
dme04213 Longevity regulating pathway - multiple species - Drosophila melanogaster (fruit fly)	0.0316917	Unigene17363_All	71 589 minus strand heat shock protein 20.7 [Schistocerca gregaria]	2.707	Up	0.0307	19.715
dme04213 Longevity regulating pathway - multiple species - Drosophila melanogaster (fruit fly)	0.0316917	Unigene11805_All	217 678 superoxide dismutase [Triatoma infestans]	1.311	Up	0.0318	15.832
dme01040 Biosynthesis of unsaturated fatty acids - Drosophila melanogaster (fruit fly)	0.398722	Unigene2139_All	163 2151 minus strand PREDICTED: similar to acyl-CoA oxidase [Tribolium castaneum]	1.232	Up	0.000523	75.236
dme01040 Biosynthesis of unsaturated fatty acids - Drosophila melanogaster (fruit fly)	0.398722	Unigene1450_All	64 984 stearoyl-coa desaturase [Aedes aegypti] >gi|108880849|gb|EAT45074.1| stearoyl-coa desaturase [Aedes aegypti]	1.281	Up	0.0138	34.976
dme00071 Fatty acid degradation - Drosophila melanogaster (fruit fly)	0.706703	Unigene2139_All	163 2151 minus strand PREDICTED: similar to acyl-CoA oxidase [Tribolium castaneum]	1.232	Up	0.000523	75.236
dme00071 Fatty acid degradation - Drosophila melanogaster (fruit fly)	0.706703	CL2978.Contig2_All	"77 1255 minus strand Acetyl-CoA acetyltransferase, cytosolic [Camponotus floridanus]"	1.237	Up	0.0224	41.525
dme01100 Metabolic pathways - Drosophila melanogaster (fruit fly)	1.81695e-05	Unigene8606_All	3 1280 PREDICTED: non-lysosomal glucosylceramidase-like [Acyrthosiphon pisum]	1.420	Up	0.00135	48.969
dme01100 Metabolic pathways - Drosophila melanogaster (fruit fly)	1.81695e-05	Unigene623_All	2 1021 minus strand PREDICTED: uridine phosphorylase 1-like [Apis mellifera]	1.289	Up	0.00816	38.488
dme01100 Metabolic pathways - Drosophila melanogaster (fruit fly)	1.81695e-05	Unigene18296_All	87 968 PREDICTED: palmitoyl-protein thioesterase 1-like [Acyrthosiphon pisum]	1.664	Up	0.00136	33.699
dme01100 Metabolic pathways - Drosophila melanogaster (fruit fly)	1.81695e-05	Unigene2431_All	96 1601 minus strand Glycerol kinase [Harpegnathos saltator]	1.224	Up	0.0478	55.249
dme01100 Metabolic pathways - Drosophila melanogaster (fruit fly)	1.81695e-05	CL1926.Contig1_All	280 2487 PREDICTED: delta-1-pyrroline-5-carboxylate synthase-like [Nasonia vitripennis]	1.272	Up	0.00939	79.601
dme01100 Metabolic pathways - Drosophila melanogaster (fruit fly)	1.81695e-05	CL750.Contig1_All	387 1769 minus strand PREDICTED: similar to 4-aminobutyrate aminotransferase [Tribolium castaneum]	1.772	Up	0.000295	51.43
dme01100 Metabolic pathways - Drosophila melanogaster (fruit fly)	1.81695e-05	Unigene11963_All	220 1251 minus strand PREDICTED: probable galactose-1-phosphate uridylyltransferase-like [Acyrthosiphon pisum]	1.406	Up	0.0177	40.388
dme01100 Metabolic pathways - Drosophila melanogaster (fruit fly)	1.81695e-05	Unigene15870_All	"163 693 minus strand 1,2-dihydroxy-3-keto-5-methylthiopentene dioxygenase [Camponotus floridanus]"	1.612	Up	0.0179	21.215
dme01100 Metabolic pathways - Drosophila melanogaster (fruit fly)	1.81695e-05	Unigene15055_All	86 1510 minus strand glycogenin [Culex quinquefasciatus] >gi|167876468|gb|EDS39851.1| glycogenin [Culex quinquefasciatus]	1.221	Up	0.00445	51.255
dme01100 Metabolic pathways - Drosophila melanogaster (fruit fly)	1.81695e-05	Unigene131_All	211 1482 Uncharacterized aarF domain-containing protein kinase 1 [Camponotus floridanus]	1.292	Up	0.0228	47.001
dme01100 Metabolic pathways - Drosophila melanogaster (fruit fly)	1.81695e-05	Unigene1445_All	78 878 minus strand PREDICTED: similar to pyrroline-5-carboxylate reductase [Tribolium castaneum]	1.625	Up	0.0121	28.223
dme01100 Metabolic pathways - Drosophila melanogaster (fruit fly)	1.81695e-05	Unigene5808_All	139 1080 minus strand PREDICTED: similar to homocysteine S-methyltransferase [Tribolium castaneum]	1.477	Up	0.00219	35.735
dme01100 Metabolic pathways - Drosophila melanogaster (fruit fly)	1.81695e-05	Unigene14482_All	89 445 minus strand Putative transthyretin-like protein ZK697.8 [Camponotus floridanus]	1.650	Up	0.00743	13.583
dme01100 Metabolic pathways - Drosophila melanogaster (fruit fly)	1.81695e-05	Unigene16116_All	198 2063 minus strand PREDICTED: transketolase-like protein 2-like isoform 1 [Bombus impatiens]	1.230	Up	0.018	67.607
dme01100 Metabolic pathways - Drosophila melanogaster (fruit fly)	1.81695e-05	Unigene10512_All	2 3025 minus strand Putative glutamate synthase [NADPH] [Harpegnathos saltator]	1.472	Up	0.000853	109.7
dme01100 Metabolic pathways - Drosophila melanogaster (fruit fly)	1.81695e-05	Unigene8465_All	23 1945 minus strand PREDICTED: aldehyde oxidase-like [Bombus terrestris]	2.113	Up	0.00602	71.07
dme01100 Metabolic pathways - Drosophila melanogaster (fruit fly)	1.81695e-05	Unigene5813_All	2 961 minus strand AMP deaminase 2 [Acromyrmex echinatior]	1.202	Up	0.0242	37.161
dme01100 Metabolic pathways - Drosophila melanogaster (fruit fly)	1.81695e-05	Unigene1610_All	96 899 PREDICTED: similar to GA19292-PA [Tribolium castaneum]	1.232	Up	0.0367	28.416
dme01100 Metabolic pathways - Drosophila melanogaster (fruit fly)	1.81695e-05	Unigene7893_All	127 852 minus strand phosphomannomutase [Schistosoma mansoni] >gi|353233060|emb|CCD80415.1| phosphomannomutase [Schistosoma mansoni]	1.210	Up	0.00429	27.911
dme01100 Metabolic pathways - Drosophila melanogaster (fruit fly)	1.81695e-05	Unigene20154_All	11 520 PREDICTED: similar to thiamin pyrophosphokinase 1 [Tribolium castaneum]	1.406	Up	0.000291	18.827
dme01100 Metabolic pathways - Drosophila melanogaster (fruit fly)	1.81695e-05	Unigene7149_All	45 1463 minus strand PREDICTED: UDP-glucose 6-dehydrogenase-like [Bombus terrestris] >gi|350400065|ref|XP_003485726.1| PREDICTED: UDP-glucose 6-dehydrogenase-like [Bombus impatiens]	1.321	Up	0.0228	52.614
dme01100 Metabolic pathways - Drosophila melanogaster (fruit fly)	1.81695e-05	CL146.Contig2_All	176 2119 minus strand PREDICTED: beta-glucuronidase-like [Acyrthosiphon pisum]	1.631	Up	0.0248	74.201
dme01100 Metabolic pathways - Drosophila melanogaster (fruit fly)	1.81695e-05	Unigene18246_All	161 760 glutathione S-transferase-like [Acyrthosiphon pisum] >gi|239790948|dbj|BAH72002.1| ACYPI002679 [Acyrthosiphon pisum]	1.553	Up	0.0179	24.096
dme01100 Metabolic pathways - Drosophila melanogaster (fruit fly)	1.81695e-05	Unigene20124_All	164 940 minus strand Inositol monophosphatase [Camponotus floridanus]	1.218	Up	0.0213	28.584
dme01100 Metabolic pathways - Drosophila melanogaster (fruit fly)	1.81695e-05	CL2199.Contig1_All	107 751 minus strand AGAP002898-PC [Anopheles gambiae str. PEST] >gi|347968788|ref|XP_003436291.1| AGAP002898-PD [Anopheles gambiae str. PEST] >gi|333467833|gb|EGK96714.1| AGAP002898-PC [Anopheles gambiae str. PEST] >gi|333467834|gb|EGK96715.1| AGAP002898-PD [Anopheles gambiae str. PEST]	1.398	Up	0.0322	24.81
dme01100 Metabolic pathways - Drosophila melanogaster (fruit fly)	1.81695e-05	Unigene14646_All	35 4117 minus strand PREDICTED: xanthine dehydrogenase-like [Bombus terrestris]	1.201	Up	0.00947	150.96
dme01100 Metabolic pathways - Drosophila melanogaster (fruit fly)	1.81695e-05	Unigene16241_All	156 752 minus strand PREDICTED: UMP-CMP kinase-like isoform 2 [Acyrthosiphon pisum]	1.204	Up	0.0103	22.549
dme01100 Metabolic pathways - Drosophila melanogaster (fruit fly)	1.81695e-05	Unigene28027_All	3 461 PREDICTED: glycogen debranching enzyme-like [Bombus impatiens]	1.319	Up	0.0478	17.986
dme01100 Metabolic pathways - Drosophila melanogaster (fruit fly)	1.81695e-05	Unigene18202_All	160 1980 minus strand PREDICTED: beta-galactosidase-like [Acyrthosiphon pisum]	1.951	Up	1.82e-05	68.82
dme01100 Metabolic pathways - Drosophila melanogaster (fruit fly)	1.81695e-05	CL3759.Contig2_All	186 1679 UDP-glucose pyrophosphorylase [Spodoptera exigua]	1.352	Up	0.011	56.345
dme01100 Metabolic pathways - Drosophila melanogaster (fruit fly)	1.81695e-05	CL1943.Contig1_All	22 1164 4-hydroxyphenylpyruvate dioxygenase [Aedes aegypti] >gi|108868917|gb|EAT33142.1| 4-hydroxyphenylpyruvate dioxygenase [Aedes aegypti]	1.999	Up	0.0242	43.722
dme01100 Metabolic pathways - Drosophila melanogaster (fruit fly)	1.81695e-05	Unigene2139_All	163 2151 minus strand PREDICTED: similar to acyl-CoA oxidase [Tribolium castaneum]	1.232	Up	0.000523	75.236
dme01100 Metabolic pathways - Drosophila melanogaster (fruit fly)	1.81695e-05	Unigene311_All	133 2205 minus strand PREDICTED: similar to GA17312-PA [Tribolium castaneum]	1.356	Up	0.0137	79.675
dme01100 Metabolic pathways - Drosophila melanogaster (fruit fly)	1.81695e-05	CL698.Contig2_All	380 2374 minus strand PREDICTED: neutral ceramidase [Apis mellifera]	2.129	Up	0.000396	73.808
dme01100 Metabolic pathways - Drosophila melanogaster (fruit fly)	1.81695e-05	Unigene3580_All	77 1495 minus strand kynurenine aminotransferase [Glossina morsitans morsitans]	1.238	Up	0.0203	53.372
dme01100 Metabolic pathways - Drosophila melanogaster (fruit fly)	1.81695e-05	CL743.Contig3_All	357 1907 PREDICTED: similar to glucosyl/glucuronosyl transferases [Tribolium castaneum]	1.233	Up	0.00839	58.831
dme01100 Metabolic pathways - Drosophila melanogaster (fruit fly)	1.81695e-05	Unigene1334_All	113 628 NADH:ubiquinone dehydrogenase [Culex quinquefasciatus] >gi|167878377|gb|EDS41760.1| NADH:ubiquinone dehydrogenase [Culex quinquefasciatus]	1.247	Up	0.00271	20.013
dme01100 Metabolic pathways - Drosophila melanogaster (fruit fly)	1.81695e-05	CL3194.Contig1_All	921 1145 minus strand Cytochrome c oxidase subunit VIb isoform 1 [Camponotus floridanus]	1.209	Up	0.0256	8.7499
dme01100 Metabolic pathways - Drosophila melanogaster (fruit fly)	1.81695e-05	Unigene18282_All	400 1320 PREDICTED: similar to CG6084 CG6084-PA [Tribolium castaneum]	1.380	Up	1.84e-05	34.703
dme01100 Metabolic pathways - Drosophila melanogaster (fruit fly)	1.81695e-05	Unigene9975_All	57 1100 minus strand sorbitol dehydrogenase [Pyrrhocoris apterus]	1.344	Up	0.000184	37.608
dme01100 Metabolic pathways - Drosophila melanogaster (fruit fly)	1.81695e-05	Unigene1595_All	95 679 minus strand PREDICTED: peptide O-xylosyltransferase-like [Saccoglossus kowalevskii]	4.089	Up	0.00855	22.015
dme01100 Metabolic pathways - Drosophila melanogaster (fruit fly)	1.81695e-05	CL880.Contig1_All	190 1272 minus strand PREDICTED: adenosylhomocysteinase A-like [Anolis carolinensis]	1.216	Up	0.0144	39.899
dme01100 Metabolic pathways - Drosophila melanogaster (fruit fly)	1.81695e-05	CL595.Contig1_All	22 3018 minus strand PREDICTED: dihydropyrimidine dehydrogenase [NADP+]-like isoform 1 [Apis mellifera]	1.395	Up	0.00185	109.55
dme01100 Metabolic pathways - Drosophila melanogaster (fruit fly)	1.81695e-05	Unigene8543_All	100 2229 PREDICTED: peroxisomal multifunctional enzyme type 2-like isoform 2 [Acyrthosiphon pisum] >gi|328711510|ref|XP_003244559.1| PREDICTED: peroxisomal multifunctional enzyme type 2-like isoform 3 [Acyrthosiphon pisum]	1.254	Up	0.00173	77.229
dme01100 Metabolic pathways - Drosophila melanogaster (fruit fly)	1.81695e-05	CL2978.Contig2_All	"77 1255 minus strand Acetyl-CoA acetyltransferase, cytosolic [Camponotus floridanus]"	1.237	Up	0.0224	41.525
dme00860 Porphyrin and chlorophyll metabolism - Drosophila melanogaster (fruit fly)	0.691203	CL146.Contig2_All	176 2119 minus strand PREDICTED: beta-glucuronidase-like [Acyrthosiphon pisum]	1.631	Up	0.0248	74.201
dme00860 Porphyrin and chlorophyll metabolism - Drosophila melanogaster (fruit fly)	0.691203	CL743.Contig3_All	357 1907 PREDICTED: similar to glucosyl/glucuronosyl transferases [Tribolium castaneum]	1.233	Up	0.00839	58.831
dme00520 Amino sugar and nucleotide sugar metabolism - Drosophila melanogaster (fruit fly)	0.0832467	Unigene11963_All	220 1251 minus strand PREDICTED: probable galactose-1-phosphate uridylyltransferase-like [Acyrthosiphon pisum]	1.406	Up	0.0177	40.388
dme00520 Amino sugar and nucleotide sugar metabolism - Drosophila melanogaster (fruit fly)	0.0832467	Unigene7149_All	45 1463 minus strand PREDICTED: UDP-glucose 6-dehydrogenase-like [Bombus terrestris] >gi|350400065|ref|XP_003485726.1| PREDICTED: UDP-glucose 6-dehydrogenase-like [Bombus impatiens]	1.321	Up	0.0228	52.614
dme00520 Amino sugar and nucleotide sugar metabolism - Drosophila melanogaster (fruit fly)	0.0832467	Unigene1526_All	11 931 minus strand PREDICTED: NADH-cytochrome b5 reductase 2-like [Bombus terrestris]	1.247	Up	0.0203	34.507
dme00520 Amino sugar and nucleotide sugar metabolism - Drosophila melanogaster (fruit fly)	0.0832467	Unigene7893_All	127 852 minus strand phosphomannomutase [Schistosoma mansoni] >gi|353233060|emb|CCD80415.1| phosphomannomutase [Schistosoma mansoni]	1.210	Up	0.00429	27.911
dme00520 Amino sugar and nucleotide sugar metabolism - Drosophila melanogaster (fruit fly)	0.0832467	CL3759.Contig2_All	186 1679 UDP-glucose pyrophosphorylase [Spodoptera exigua]	1.352	Up	0.011	56.345
dme00232 Caffeine metabolism - Drosophila melanogaster (fruit fly)	0.141232	Unigene8465_All	23 1945 minus strand PREDICTED: aldehyde oxidase-like [Bombus terrestris]	2.113	Up	0.00602	71.07
dme00232 Caffeine metabolism - Drosophila melanogaster (fruit fly)	0.141232	Unigene14646_All	35 4117 minus strand PREDICTED: xanthine dehydrogenase-like [Bombus terrestris]	1.201	Up	0.00947	150.96
dme00600 Sphingolipid metabolism - Drosophila melanogaster (fruit fly)	0.0556938	Unigene8606_All	3 1280 PREDICTED: non-lysosomal glucosylceramidase-like [Acyrthosiphon pisum]	1.420	Up	0.00135	48.969
dme00600 Sphingolipid metabolism - Drosophila melanogaster (fruit fly)	0.0556938	CL698.Contig2_All	380 2374 minus strand PREDICTED: neutral ceramidase [Apis mellifera]	2.129	Up	0.000396	73.808
dme00600 Sphingolipid metabolism - Drosophila melanogaster (fruit fly)	0.0556938	Unigene18202_All	160 1980 minus strand PREDICTED: beta-galactosidase-like [Acyrthosiphon pisum]	1.951	Up	1.82e-05	68.82
dme01230 Biosynthesis of amino acids - Drosophila melanogaster (fruit fly)	0.169286	Unigene16116_All	198 2063 minus strand PREDICTED: transketolase-like protein 2-like isoform 1 [Bombus impatiens]	1.230	Up	0.018	67.607
dme01230 Biosynthesis of amino acids - Drosophila melanogaster (fruit fly)	0.169286	Unigene10512_All	2 3025 minus strand Putative glutamate synthase [NADPH] [Harpegnathos saltator]	1.472	Up	0.000853	109.7
dme01230 Biosynthesis of amino acids - Drosophila melanogaster (fruit fly)	0.169286	Unigene1610_All	96 899 PREDICTED: similar to GA19292-PA [Tribolium castaneum]	1.232	Up	0.0367	28.416
dme01230 Biosynthesis of amino acids - Drosophila melanogaster (fruit fly)	0.169286	CL1926.Contig1_All	280 2487 PREDICTED: delta-1-pyrroline-5-carboxylate synthase-like [Nasonia vitripennis]	1.272	Up	0.00939	79.601
dme01230 Biosynthesis of amino acids - Drosophila melanogaster (fruit fly)	0.169286	Unigene1445_All	78 878 minus strand PREDICTED: similar to pyrroline-5-carboxylate reductase [Tribolium castaneum]	1.625	Up	0.0121	28.223
dme00410 beta-Alanine metabolism - Drosophila melanogaster (fruit fly)	0.620696	CL750.Contig1_All	387 1769 minus strand PREDICTED: similar to 4-aminobutyrate aminotransferase [Tribolium castaneum]	1.772	Up	0.000295	51.43
dme00410 beta-Alanine metabolism - Drosophila melanogaster (fruit fly)	0.620696	CL595.Contig1_All	22 3018 minus strand PREDICTED: dihydropyrimidine dehydrogenase [NADP+]-like isoform 1 [Apis mellifera]	1.395	Up	0.00185	109.55
dme00980 Metabolism of xenobiotics by cytochrome P450 - Drosophila melanogaster (fruit fly)	0.620696	Unigene18246_All	161 760 glutathione S-transferase-like [Acyrthosiphon pisum] >gi|239790948|dbj|BAH72002.1| ACYPI002679 [Acyrthosiphon pisum]	1.553	Up	0.0179	24.096
dme00980 Metabolism of xenobiotics by cytochrome P450 - Drosophila melanogaster (fruit fly)	0.620696	CL743.Contig3_All	357 1907 PREDICTED: similar to glucosyl/glucuronosyl transferases [Tribolium castaneum]	1.233	Up	0.00839	58.831
dme00130 Ubiquinone and other terpenoid-quinone biosynthesis - Drosophila melanogaster (fruit fly)	0.299342	Unigene131_All	211 1482 Uncharacterized aarF domain-containing protein kinase 1 [Camponotus floridanus]	1.292	Up	0.0228	47.001
dme00130 Ubiquinone and other terpenoid-quinone biosynthesis - Drosophila melanogaster (fruit fly)	0.299342	CL1943.Contig1_All	22 1164 4-hydroxyphenylpyruvate dioxygenase [Aedes aegypti] >gi|108868917|gb|EAT33142.1| 4-hydroxyphenylpyruvate dioxygenase [Aedes aegypti]	1.999	Up	0.0242	43.722
dme00052 Galactose metabolism - Drosophila melanogaster (fruit fly)	0.0636751	Unigene11963_All	220 1251 minus strand PREDICTED: probable galactose-1-phosphate uridylyltransferase-like [Acyrthosiphon pisum]	1.406	Up	0.0177	40.388
dme00052 Galactose metabolism - Drosophila melanogaster (fruit fly)	0.0636751	Unigene18282_All	400 1320 PREDICTED: similar to CG6084 CG6084-PA [Tribolium castaneum]	1.380	Up	1.84e-05	34.703
dme00052 Galactose metabolism - Drosophila melanogaster (fruit fly)	0.0636751	CL3759.Contig2_All	186 1679 UDP-glucose pyrophosphorylase [Spodoptera exigua]	1.352	Up	0.011	56.345
dme00052 Galactose metabolism - Drosophila melanogaster (fruit fly)	0.0636751	Unigene18202_All	160 1980 minus strand PREDICTED: beta-galactosidase-like [Acyrthosiphon pisum]	1.951	Up	1.82e-05	68.82
dme00531 Glycosaminoglycan degradation - Drosophila melanogaster (fruit fly)	0.334149	CL146.Contig2_All	176 2119 minus strand PREDICTED: beta-glucuronidase-like [Acyrthosiphon pisum]	1.631	Up	0.0248	74.201
dme00531 Glycosaminoglycan degradation - Drosophila melanogaster (fruit fly)	0.334149	Unigene18202_All	160 1980 minus strand PREDICTED: beta-galactosidase-like [Acyrthosiphon pisum]	1.951	Up	1.82e-05	68.82
dme00500 Starch and sucrose metabolism - Drosophila melanogaster (fruit fly)	0.0723288	Unigene311_All	133 2205 minus strand PREDICTED: similar to GA17312-PA [Tribolium castaneum]	1.356	Up	0.0137	79.675
dme00500 Starch and sucrose metabolism - Drosophila melanogaster (fruit fly)	0.0723288	Unigene15055_All	86 1510 minus strand glycogenin [Culex quinquefasciatus] >gi|167876468|gb|EDS39851.1| glycogenin [Culex quinquefasciatus]	1.221	Up	0.00445	51.255
dme00500 Starch and sucrose metabolism - Drosophila melanogaster (fruit fly)	0.0723288	Unigene28027_All	3 461 PREDICTED: glycogen debranching enzyme-like [Bombus impatiens]	1.319	Up	0.0478	17.986
dme00500 Starch and sucrose metabolism - Drosophila melanogaster (fruit fly)	0.0723288	CL3759.Contig2_All	186 1679 UDP-glucose pyrophosphorylase [Spodoptera exigua]	1.352	Up	0.011	56.345
dme00640 Propanoate metabolism - Drosophila melanogaster (fruit fly)	0.674895	CL750.Contig1_All	387 1769 minus strand PREDICTED: similar to 4-aminobutyrate aminotransferase [Tribolium castaneum]	1.772	Up	0.000295	51.43
dme00640 Propanoate metabolism - Drosophila melanogaster (fruit fly)	0.674895	CL2978.Contig2_All	"77 1255 minus strand Acetyl-CoA acetyltransferase, cytosolic [Camponotus floridanus]"	1.237	Up	0.0224	41.525
dme00561 Glycerolipid metabolism - Drosophila melanogaster (fruit fly)	0.657737	Unigene2431_All	96 1601 minus strand Glycerol kinase [Harpegnathos saltator]	1.224	Up	0.0478	55.249
dme00561 Glycerolipid metabolism - Drosophila melanogaster (fruit fly)	0.657737	Unigene18282_All	400 1320 PREDICTED: similar to CG6084 CG6084-PA [Tribolium castaneum]	1.380	Up	1.84e-05	34.703
dme00981 Insect hormone biosynthesis - Drosophila melanogaster (fruit fly)	0.509888	Unigene6419_All	65 1402 minus strand PREDICTED: similar to juvenile hormone epoxide hydrolase [Tribolium castaneum]	1.416	Up	0.0301	51.222
dme00981 Insect hormone biosynthesis - Drosophila melanogaster (fruit fly)	0.509888	Unigene3633_All	396 1748 PREDICTED: similar to juvenile hormone epoxide hydrolase [Tribolium castaneum]	1.368	Up	0.0184	51.695
