# Supplementary material for: Differential Proteomics Analysis Unraveled Mechanisms of Arma chinensis Responding to Improved Artificial Diet
Source: Insects. 2022 Jul 2;13(7):605. doi: 10.3390/insects13070605 (PMC9319121; doi:10.3390/insects13070605)
Supplement: Supplementary file 1 [file insects-13-00605-s001.zip › Supplementary Table S13.xlsx]

## Sheet: Down Pathway2Protein
Table S13. KEGG pathway enrichment analysis for the down-regulated DEPs in IADN/COSMN.
KEGG pathway	Fisher's exact test p value	Protein accession	Protein description	IADN/COSMN Ratio	Regulated Type	IADN/COSMN P value	MW [kDa]
dme03060 Protein export - Drosophila melanogaster (fruit fly)	2.44429e-07	Unigene20011_All	91 669 minus strand signal peptidase complex subunit SPC25 [Dipetalogaster maximus]	0.820	Down	0.0407	22.029
dme03060 Protein export - Drosophila melanogaster (fruit fly)	2.44429e-07	Unigene8238_All	124 408 Sec61 protein translocation complex beta subunit [Triatoma infestans] >gi|344190604|gb|AEM97988.1| Sec61 protein translocation complex beta subunit [Dipetalogaster maximus]	0.645	Down	0.00377	10.073
dme03060 Protein export - Drosophila melanogaster (fruit fly)	2.44429e-07	Unigene7799_All	1 1275 Sec61 alpha 1 subunit [Acyrthosiphon pisum] >gi|52630957|gb|AAU84942.1| probable transport protein Sec61 alpha subunit [Toxoptera citricida]	0.694	Down	0.0115	46.164
dme03060 Protein export - Drosophila melanogaster (fruit fly)	2.44429e-07	Unigene4339_All	229 2178 signal recognition particle [Aedes aegypti] >gi|108881114|gb|EAT45339.1| signal recognition particle [Aedes aegypti]	0.797	Down	0.0344	73.405
dme03060 Protein export - Drosophila melanogaster (fruit fly)	2.44429e-07	Unigene18871_All	110 670 minus strand signal peptidase 18 kDa subunit [Triatoma matogrossensis]	0.775	Down	0.00416	21.102
dme03060 Protein export - Drosophila melanogaster (fruit fly)	2.44429e-07	Unigene20699_All	77 364 minus strand signal peptidase complex subunit 1-like protein [Triatoma matogrossensis]	0.733	Down	0.00649	11.27
dme03060 Protein export - Drosophila melanogaster (fruit fly)	2.44429e-07	Unigene15048_All	281 2176 heat shock cognate 70 [Aedes aegypti]	0.830	Down	0.0127	70.079
dme03060 Protein export - Drosophila melanogaster (fruit fly)	2.44429e-07	CL3526.Contig1_All	118 1629 minus strand PREDICTED: similar to AGAP004610-PA [Tribolium castaneum]	0.759	Down	0.0366	55.407
dme03060 Protein export - Drosophila melanogaster (fruit fly)	2.44429e-07	Unigene18189_All	95 1948 PREDICTED: signal recognition particle receptor subunit alpha homolog isoform 2 [Nasonia vitripennis]	0.757	Down	0.0112	68.989
dme04145 Phagosome - Drosophila melanogaster (fruit fly)	0.273006	Unigene6584_All	149 787 PREDICTED: similar to snare protein sec22 [Tribolium castaneum]	0.709	Down	0.0296	24.654
dme04145 Phagosome - Drosophila melanogaster (fruit fly)	0.273006	Unigene17927_All	105 473 minus strand GF13376 [Drosophila ananassae] >gi|190621768|gb|EDV37292.1| GF13376 [Drosophila ananassae]	0.790	Down	0.0493	13.796
dme04145 Phagosome - Drosophila melanogaster (fruit fly)	0.273006	Unigene8238_All	124 408 Sec61 protein translocation complex beta subunit [Triatoma infestans] >gi|344190604|gb|AEM97988.1| Sec61 protein translocation complex beta subunit [Dipetalogaster maximus]	0.645	Down	0.00377	10.073
dme04145 Phagosome - Drosophila melanogaster (fruit fly)	0.273006	Unigene7799_All	1 1275 Sec61 alpha 1 subunit [Acyrthosiphon pisum] >gi|52630957|gb|AAU84942.1| probable transport protein Sec61 alpha subunit [Toxoptera citricida]	0.694	Down	0.0115	46.164
dme00480 Glutathione metabolism - Drosophila melanogaster (fruit fly)	0.736932	Unigene9992_All	63 908 minus strand PREDICTED: spermidine synthase [Apis mellifera]	0.617	Down	0.00253	31.724
dme00480 Glutathione metabolism - Drosophila melanogaster (fruit fly)	0.736932	Unigene1533_All	2 1087 minus strand PREDICTED: ribonucleoside-diphosphate reductase large subunit isoform 1 [Sus scrofa]	0.691	Down	0.0037	40.975
dme04144 Endocytosis - Drosophila melanogaster (fruit fly)	0.182819	CL4701.Contig1_All	46 1653 ADP-ribosylation factor GTPase activating protein 2 [Acyrthosiphon pisum]	0.768	Down	0.00599	60.09
dme04144 Endocytosis - Drosophila melanogaster (fruit fly)	0.182819	Unigene99_All	301 1620 minus strand vacuolar protein sorting 4 [Danaus plexippus]	0.773	Down	0.0329	49.476
dme04144 Endocytosis - Drosophila melanogaster (fruit fly)	0.182819	Unigene448_All	175 720 ADP-ribosylation factor [Bombyx mori] >gi|87248075|gb|ABD36090.1| ADP-ribosylation factor [Bombyx mori] >gi|357363768|gb|AET74048.1| ADP-ribosylation factor [Spodoptera exigua]	0.712	Down	0.00208	20.72
dme04144 Endocytosis - Drosophila melanogaster (fruit fly)	0.182819	Unigene7767_All	158 1099 minus strand PREDICTED: similar to arf gtpase-activating protein [Tribolium castaneum]	0.701	Down	0.0202	34.952
dme04144 Endocytosis - Drosophila melanogaster (fruit fly)	0.182819	Unigene15938_All	113 706 GJ14099 [Drosophila virilis] >gi|194155827|gb|EDW71011.1| GJ14099 [Drosophila virilis]	0.807	Down	0.00632	22.083
dme04144 Endocytosis - Drosophila melanogaster (fruit fly)	0.182819	Unigene3554_All	161 1300 PREDICTED: tumor susceptibility gene 101 protein-like [Bombus impatiens]	0.786	Down	0.00156	42.997
dme04120 Ubiquitin mediated proteolysis - Drosophila melanogaster (fruit fly)	0.273006	Unigene16777_All	1 756 minus strand Cell division cycle protein 23-like protein [Camponotus floridanus]	0.046	Down	0.00818	29.11
dme04120 Ubiquitin mediated proteolysis - Drosophila melanogaster (fruit fly)	0.273006	Unigene18247_All	183 635 minus strand PREDICTED: similar to ubiquitin conjugating enzyme E2 [Tribolium castaneum]	0.796	Down	0.0107	17.195
dme04120 Ubiquitin mediated proteolysis - Drosophila melanogaster (fruit fly)	0.273006	Unigene20032_All	118 594 minus strand ubiquitin protein ligase [Glossina morsitans morsitans] >gi|289740111|gb|ADD18803.1| ubiquitin protein ligase [Glossina morsitans morsitans]	0.717	Down	0.0297	18.081
dme04120 Ubiquitin mediated proteolysis - Drosophila melanogaster (fruit fly)	0.273006	Unigene3574_All	147 587 effete [Drosophila melanogaster] >gi|187117170|ref|NP_001119686.1| effete [Acyrthosiphon pisum] >gi|58381090|ref|XP_310998.2| AGAP000145-PA [Anopheles gambiae str. PEST] >gi|157134117|ref|XP_001663154.1| ubiquitin-conjugating enzyme E2 [Aedes aegypti] >gi|194743322|ref|XP_001954149.1| GF18131 [Drosophila ananassae] >gi|194900836|ref|XP_001979961.1| GG21088 [Drosophila erecta] >gi|19506122…	0.778	Down	0.0196	16.678
dme00520 Amino sugar and nucleotide sugar metabolism - Drosophila melanogaster (fruit fly)	0.403755	Unigene13894_All	2 745 minus strand AGAP002347-PA [Anopheles gambiae str. PEST] >gi|333468356|gb|EAA08223.5| AGAP002347-PA [Anopheles gambiae str. PEST]	0.679	Down	0.00978	27.12
dme00520 Amino sugar and nucleotide sugar metabolism - Drosophila melanogaster (fruit fly)	0.403755	CL4264.Contig3_All	71 2146 Glucosamine--fructose-6-phosphate aminotransferase [isomerizing] 2 [Harpegnathos saltator]	0.723	Down	0.013	77.776
dme00520 Amino sugar and nucleotide sugar metabolism - Drosophila melanogaster (fruit fly)	0.403755	Unigene362_All	187 1836 minus strand beta-N-acetylglucosaminidase 1 precursor [Bombyx mori] >gi|139004970|dbj|BAF52531.1| beta-N-acetylglucosaminidase 1 [Bombyx mori]	0.815	Down	0.0496	62.77
dme04141 Protein processing in endoplasmic reticulum - Drosophila melanogaster (fruit fly)	0.0667169	Unigene15048_All	281 2176 heat shock cognate 70 [Aedes aegypti]	0.830	Down	0.0127	70.079
dme04141 Protein processing in endoplasmic reticulum - Drosophila melanogaster (fruit fly)	0.0667169	CL1996.Contig1_All	189 872 minus strand PREDICTED: endoplasmic reticulum resident protein 29-like [Acyrthosiphon pisum]	0.681	Down	0.00195	25.827
dme04141 Protein processing in endoplasmic reticulum - Drosophila melanogaster (fruit fly)	0.0667169	Unigene8238_All	124 408 Sec61 protein translocation complex beta subunit [Triatoma infestans] >gi|344190604|gb|AEM97988.1| Sec61 protein translocation complex beta subunit [Dipetalogaster maximus]	0.645	Down	0.00377	10.073
dme04141 Protein processing in endoplasmic reticulum - Drosophila melanogaster (fruit fly)	0.0667169	CL331.Contig1_All	128 2281 minus strand heat shock protein 90 [Gryllus firmus]	0.805	Down	0.00374	82.6
dme04141 Protein processing in endoplasmic reticulum - Drosophila melanogaster (fruit fly)	0.0667169	Unigene7799_All	1 1275 Sec61 alpha 1 subunit [Acyrthosiphon pisum] >gi|52630957|gb|AAU84942.1| probable transport protein Sec61 alpha subunit [Toxoptera citricida]	0.694	Down	0.0115	46.164
dme04141 Protein processing in endoplasmic reticulum - Drosophila melanogaster (fruit fly)	0.0667169	Unigene9891_All	106 2436 endoplasmin [Locusta migratoria]	0.677	Down	0.00503	88.485
dme04141 Protein processing in endoplasmic reticulum - Drosophila melanogaster (fruit fly)	0.0667169	Unigene3574_All	147 587 effete [Drosophila melanogaster] >gi|187117170|ref|NP_001119686.1| effete [Acyrthosiphon pisum] >gi|58381090|ref|XP_310998.2| AGAP000145-PA [Anopheles gambiae str. PEST] >gi|157134117|ref|XP_001663154.1| ubiquitin-conjugating enzyme E2 [Aedes aegypti] >gi|194743322|ref|XP_001954149.1| GF18131 [Drosophila ananassae] >gi|194900836|ref|XP_001979961.1| GG21088 [Drosophila erecta] >gi|19506122…	0.778	Down	0.0196	16.678
dme04141 Protein processing in endoplasmic reticulum - Drosophila melanogaster (fruit fly)	0.0667169	CL1793.Contig1_All	330 818 minus strand heat shock protein 20.7 [Schistocerca gregaria]	0.621	Down	0.00527	18.188
dme00564 Glycerophospholipid metabolism - Drosophila melanogaster (fruit fly)	0.268435	Unigene18212_All	81 1451 minus strand Alanine--glyoxylate aminotransferase 2-like protein [Acromyrmex echinatior]	0.745	Down	0.0117	51.075
dme00564 Glycerophospholipid metabolism - Drosophila melanogaster (fruit fly)	0.268435	Unigene16061_All	131 1183 Ethanolamine-phosphate cytidylyltransferase [Camponotus floridanus]	0.615	Down	0.00697	39.812
dme00564 Glycerophospholipid metabolism - Drosophila melanogaster (fruit fly)	0.268435	Unigene8530_All	277 2733 PREDICTED: similar to glycerol-3-phosphate acyltransferase [Tribolium castaneum]	0.675	Down	0.00406	93.165
dme03010 Ribosome - Drosophila melanogaster (fruit fly)	0.105723	Unigene6180_All	66 413 minus strand 60S ribosomal protein L34 [Acromyrmex echinatior]	0.630	Down	0.0198	13.788
dme03010 Ribosome - Drosophila melanogaster (fruit fly)	0.105723	Unigene20694_All	74 442 ribosomal protein L35 [Chrysomela tremula]	0.506	Down	0.0415	14.381
dme03010 Ribosome - Drosophila melanogaster (fruit fly)	0.105723	Unigene9794_All	113 523 ribosomal protein L28 [Triatoma brasiliensis]	0.798	Down	0.000888	15.781
dme03010 Ribosome - Drosophila melanogaster (fruit fly)	0.105723	CL2767.Contig2_All	108 479 minus strand ribosomal protein S12 [Manduca sexta]	0.786	Down	0.007	13.62
dme03010 Ribosome - Drosophila melanogaster (fruit fly)	0.105723	Unigene11792_All	70 702 minus strand 60S ribosomal protein L15 [Harpegnathos saltator]	0.714	Down	0.0319	24.846
dme03010 Ribosome - Drosophila melanogaster (fruit fly)	0.105723	Unigene13832_All	36 632 minus strand PREDICTED: similar to ribosomal protein L19e [Tribolium castaneum]	0.707	Down	0.00691	23.655
dme03010 Ribosome - Drosophila melanogaster (fruit fly)	0.105723	Unigene13867_All	66 674 minus strand PREDICTED: 60S ribosomal protein L13a-like [Bombus impatiens]	0.767	Down	0.0117	23.136
dme03010 Ribosome - Drosophila melanogaster (fruit fly)	0.105723	Unigene7603_All	48 788 minus strand 40S ribosomal protein S6 [Acromyrmex echinatior]	0.820	Down	0.0199	28.505
dme03010 Ribosome - Drosophila melanogaster (fruit fly)	0.105723	CL1551.Contig2_All	79 903 minus strand PREDICTED: similar to ribosomal protein S2 [Tribolium castaneum]	0.823	Down	0.0049	29.45
dme00790 Folate biosynthesis - Drosophila melanogaster (fruit fly)	0.148592	CL2035.Contig3_All	56 676 PREDICTED: probable saccharopine dehydrogenase-like isoform 1 [Apis mellifera]	0.532	Down	0.000159	23.532
dme00790 Folate biosynthesis - Drosophila melanogaster (fruit fly)	0.148592	Unigene2564_All	250 945 PREDICTED: dihydropteridine reductase-like [Nasonia vitripennis]	0.831	Down	0.024	24.904
dme00790 Folate biosynthesis - Drosophila melanogaster (fruit fly)	0.148592	Unigene9670_All	100 642 minus strand GI23507 [Drosophila mojavensis] >gi|193915264|gb|EDW14131.1| GI23507 [Drosophila mojavensis]	0.746	Down	0.00259	20.452
dme04624 Toll and Imd signaling pathway - Drosophila melanogaster (fruit fly)	0.564503	Unigene18247_All	183 635 minus strand PREDICTED: similar to ubiquitin conjugating enzyme E2 [Tribolium castaneum]	0.796	Down	0.0107	17.195
dme04624 Toll and Imd signaling pathway - Drosophila melanogaster (fruit fly)	0.564503	Unigene3574_All	147 587 effete [Drosophila melanogaster] >gi|187117170|ref|NP_001119686.1| effete [Acyrthosiphon pisum] >gi|58381090|ref|XP_310998.2| AGAP000145-PA [Anopheles gambiae str. PEST] >gi|157134117|ref|XP_001663154.1| ubiquitin-conjugating enzyme E2 [Aedes aegypti] >gi|194743322|ref|XP_001954149.1| GF18131 [Drosophila ananassae] >gi|194900836|ref|XP_001979961.1| GG21088 [Drosophila erecta] >gi|19506122…	0.778	Down	0.0196	16.678
