# Supplementary material for: Differential Proteomics Analysis Unraveled Mechanisms of Arma chinensis Responding to Improved Artificial Diet
Source: Insects. 2022 Jul 2;13(7):605. doi: 10.3390/insects13070605 (PMC9319121; doi:10.3390/insects13070605)
Supplement: Supplementary file 1 [file insects-13-00605-s001.zip › Supplementary Table S14.xlsx]

## Sheet: Up Domain2Protein
Table S14. Protein domain enrichment analysis for the up-regulated DEPs in IADA/COSMA.
Domain Description	Fisher's exact test p value	Protein accession	Protein description	IADA/COSMA Ratio	Regulated Type	IADA/COSMA P value	MW [kDa]
Serum albumin, N-terminal	0.150408	Unigene32074_All	3 674 minus strand albumin [Sus scrofa domesticus]	3.403	Up	0.00578	25.238
Serum albumin, N-terminal	0.150408	Unigene28901_All	2 229 minus strand albumin [Sus scrofa]	4.611	Up	0.0354	8.5354
Acyl-CoA dehydrogenase/oxidase, N-terminal	0.386981	Unigene2139_All	163 2151 minus strand PREDICTED: similar to acyl-CoA oxidase [Tribolium castaneum]	1.235	Up	0.0186	75.236
Acyl-CoA dehydrogenase/oxidase, N-terminal	0.386981	Unigene1599_All	"48 1271 PREDICTED: isovaleryl-CoA dehydrogenase, mitochondrial-like [Bombus impatiens]"	1.336	Up	0.0295	44.821
Nucleotide-diphospho-sugar transferases	0.624616	Unigene15055_All	86 1510 minus strand glycogenin [Culex quinquefasciatus] >gi|167876468|gb|EDS39851.1| glycogenin [Culex quinquefasciatus]	1.225	Up	0.00432	51.255
Nucleotide-diphospho-sugar transferases	0.624616	CL3759.Contig2_All	186 1679 UDP-glucose pyrophosphorylase [Spodoptera exigua]	1.255	Up	0.0173	56.345
Acyl-CoA oxidase/dehydrogenase, central domain	0.419462	Unigene2139_All	163 2151 minus strand PREDICTED: similar to acyl-CoA oxidase [Tribolium castaneum]	1.235	Up	0.0186	75.236
Acyl-CoA oxidase/dehydrogenase, central domain	0.419462	Unigene1599_All	"48 1271 PREDICTED: isovaleryl-CoA dehydrogenase, mitochondrial-like [Bombus impatiens]"	1.336	Up	0.0295	44.821
Acyl-CoA dehydrogenase/oxidase, N-terminal and middle domain	0.419462	Unigene2139_All	163 2151 minus strand PREDICTED: similar to acyl-CoA oxidase [Tribolium castaneum]	1.235	Up	0.0186	75.236
Acyl-CoA dehydrogenase/oxidase, N-terminal and middle domain	0.419462	Unigene1599_All	"48 1271 PREDICTED: isovaleryl-CoA dehydrogenase, mitochondrial-like [Bombus impatiens]"	1.336	Up	0.0295	44.821
Aldehyde dehydrogenase N-terminal domain	0.479372	Unigene17115_All	204 1901 minus strand PREDICTED: similar to pyrroline-5-carboxylate dehydrogenase [Tribolium castaneum]	1.216	Up	0.00739	62.781
Aldehyde dehydrogenase N-terminal domain	0.479372	Unigene1515_All	49 1545 minus strand GH13324 [Drosophila grimshawi] >gi|193900077|gb|EDV98943.1| GH13324 [Drosophila grimshawi]	1.720	Up	0.0044	55.04
ERAP1-like C-terminal domain	0.12965	Unigene6391_All	80 2734 minus strand PREDICTED: endoplasmic reticulum aminopeptidase 2-like [Acyrthosiphon pisum]	1.276	Up	0.0109	100.35
ERAP1-like C-terminal domain	0.12965	Unigene25864_All	3 767 minus strand Aminopeptidase N [Harpegnathos saltator]	1.246	Up	0.0448	29.413
ERAP1-like C-terminal domain	0.12965	CL3835.Contig1_All	87 2759 minus strand PREDICTED: similar to protease m1 zinc metalloprotease [Tribolium castaneum]	2.202	Up	0.0312	103.68
Ankyrin repeat-containing domain	0.279321	CL2012.Contig3_All	"22 543 minus strand PREDICTED: similar to ankyrin 2,3/unc44 [Strongylocentrotus purpuratus] >gi|115928953|ref|XP_001193458.1| PREDICTED: similar to ankyrin 2,3/unc44 [Strongylocentrotus purpuratus]"	1.358	Up	0.0303	18.713
Ankyrin repeat-containing domain	0.279321	Unigene33133_All	1 456 PREDICTED: integrin-linked protein kinase-like [Acyrthosiphon pisum]	1.282	Up	0.00499	17.081
Ankyrin repeat-containing domain	0.279321	Unigene2150_All	"628 2532 ankyrin 2,3/unc44 [Aedes aegypti] >gi|108868849|gb|EAT33074.1| ankyrin 2,3/unc44 [Aedes aegypti]"	1.243	Up	0.0278	67.906
Ankyrin repeat-containing domain	0.279321	Unigene16145_All	"37 3531 PREDICTED: similar to ankyrin 2,3/unc44 [Strongylocentrotus purpuratus] >gi|115929638|ref|XP_001182096.1| PREDICTED: similar to ankyrin 2,3/unc44 [Strongylocentrotus purpuratus]"	1.375	Up	0.0286	125.86
Ankyrin repeat-containing domain	0.279321	Unigene23807_All	5 244 PREDICTED: ankyrin repeat protein-like [Saccoglossus kowalevskii]	1.747	Up	0.0436	8.6098
Ankyrin repeat-containing domain	0.279321	Unigene19229_All	"3 1295 minus strand ankyrin 2,3/unc44 [Aedes aegypti] >gi|108868779|gb|EAT33004.1| ankyrin 2,3/unc44 [Aedes aegypti]"	1.247	Up	0.0214	47.857
Chitin binding domain	0.0247046	Unigene14133_All	37 726 cuticular protein analogous to peritrophins 3-A1 precursor [Tribolium castaneum] >gi|268309018|gb|ACY95475.1| cuticular protein analogous to peritrophins 3-A1 [Tribolium castaneum]	2.137	Up	0.0162	25.705
Chitin binding domain	0.0247046	Unigene20356_All	32 805 minus strand cuticular protein analogous to peritrophins 3-C5 isoform 1 precursor [Tribolium castaneum] >gi|119387888|gb|ABL73929.1| obstractor C1 [Tribolium castaneum]	1.945	Up	0.0291	28.486
Chitin binding domain	0.0247046	Unigene4928_All	133 339 minus strand cuticular protein analogous to peritrophins 3-A2 precursor [Tribolium castaneum] >gi|268309020|gb|ACY95476.1| cuticular protein analogous to peritrophins 3-A2 [Tribolium castaneum]	2.334	Up	0.0271	7.4783
Chitin binding domain	0.0247046	Unigene20314_All	82 735 minus strand cuticular protein analogous to peritrophins 3-D1 [Danaus plexippus]	1.222	Up	0.00866	23.908
Chitin binding domain	0.0247046	Unigene3696_All	108 797 minus strand cuticular protein analogous to peritrophins 3-B precursor [Acyrthosiphon pisum]	1.551	Up	0.0287	26.381
Chitin binding domain	0.0247046	Unigene18191_All	60 1661 minus strand GI13501 [Drosophila mojavensis] >gi|193920062|gb|EDW18929.1| GI13501 [Drosophila mojavensis]	1.482	Up	0.0388	60.896
CHK kinase-like	0.168755	CL352.Contig1_All	140 1330 minus strand GG11391 [Drosophila erecta] >gi|190656463|gb|EDV53695.1| GG11391 [Drosophila erecta]	1.517	Up	0.00958	46.893
CHK kinase-like	0.168755	CL999.Contig1_All	65 1183 GG12266 [Drosophila erecta] >gi|190656458|gb|EDV53690.1| GG12266 [Drosophila erecta]	1.585	Up	0.00371	42.559
CHK kinase-like	0.168755	Unigene14724_All	79 1242 minus strand GH14824 [Drosophila grimshawi] >gi|193892434|gb|EDV91300.1| GH14824 [Drosophila grimshawi]	1.389	Up	0.0127	44.756
CHK kinase-like	0.168755	CL999.Contig2_All	90 1208 GG12266 [Drosophila erecta] >gi|190656458|gb|EDV53690.1| GG12266 [Drosophila erecta]	1.325	Up	0.0165	42.446
Pyridoxal phosphate-dependent transferase	0.0190386	Unigene6523_All	2 715 minus strand alanine-glyoxylate aminotransferase [Aedes aegypti] >gi|108884056|gb|EAT48281.1| alanine-glyoxylate aminotransferase [Aedes aegypti]	1.520	Up	0.00318	25.851
Pyridoxal phosphate-dependent transferase	0.0190386	CL2426.Contig2_All	1 1044 PREDICTED: similar to aromatic amino acid decarboxylase [Tribolium castaneum]	1.660	Up	0.00998	39.698
Pyridoxal phosphate-dependent transferase	0.0190386	CL1212.Contig1_All	172 1263 minus strand AGAP003688-PA [Anopheles gambiae str. PEST] >gi|157017532|gb|EAA08948.4| AGAP003688-PA [Anopheles gambiae str. PEST]	1.798	Up	0.00461	40.45
Pyridoxal phosphate-dependent transferase	0.0190386	CL750.Contig1_All	387 1769 minus strand PREDICTED: similar to 4-aminobutyrate aminotransferase [Tribolium castaneum]	1.518	Up	0.000565	51.43
Pyridoxal phosphate-dependent transferase	0.0190386	Unigene3580_All	77 1495 minus strand kynurenine aminotransferase [Glossina morsitans morsitans]	1.320	Up	0.00231	53.372
Pyridoxal phosphate-dependent transferase	0.0190386	CL2400.Contig1_All	276 1712 minus strand PREDICTED: alanine aminotransferase 2-like [Acyrthosiphon pisum]	1.236	Up	0.0202	53.876
Glycosyl hydrolase, all-beta	0.386981	Unigene9903_All	"226 1539 minus strand PREDICTED: similar to fucosidase, alpha-L- 2, plasma [Tribolium castaneum]"	1.227	Up	0.00429	50.82
Glycosyl hydrolase, all-beta	0.386981	Unigene9907_All	58 1437 alpha-amylase [Blattella germanica]	1.390	Up	0.0166	51.817
Aldehyde dehydrogenase, C-terminal	0.479372	Unigene17115_All	204 1901 minus strand PREDICTED: similar to pyrroline-5-carboxylate dehydrogenase [Tribolium castaneum]	1.216	Up	0.00739	62.781
Aldehyde dehydrogenase, C-terminal	0.479372	Unigene1515_All	49 1545 minus strand GH13324 [Drosophila grimshawi] >gi|193900077|gb|EDV98943.1| GH13324 [Drosophila grimshawi]	1.720	Up	0.0044	55.04
Alpha/beta hydrolase fold-1	0.533126	Unigene2287_All	128 1234 Protein phosphatase methylesterase 1 [Harpegnathos saltator]	1.258	Up	0.00337	40.839
Alpha/beta hydrolase fold-1	0.533126	CL3657.Contig1_All	27 878 minus strand PREDICTED: serine hydrolase-like protein-like [Nasonia vitripennis]	1.202	Up	0.0183	32.646
Phosphopantetheine binding ACP domain	0.237942	CL2613.Contig1_All	64 507 acyl carrier protein/NADH-ubiquinone oxidoreductase NDUFAB1/SDAP subunit [Aedes aegypti]	1.228	Up	0.00754	16.632
Phosphopantetheine binding ACP domain	0.237942	Unigene16828_All	12 1808 PREDICTED: similar to fatty acid synthase [Tribolium castaneum]	1.555	Up	0.0207	65.315
Cathepsin propeptide inhibitor domain (I29)	0.603571	CL1335.Contig2_All	123 1127 GH22826 [Drosophila grimshawi] >gi|193899288|gb|EDV98154.1| GH22826 [Drosophila grimshawi]	1.671	Up	0.0298	37.454
Cathepsin propeptide inhibitor domain (I29)	0.603571	Unigene16075_All	173 1174 minus strand cathepsin L-like cysteine protease 2 [Plautia stali]	1.206	Up	0.0277	37.586
Pyridoxal phosphate-dependent transferase, major region, subdomain 1	0.0122629	Unigene6523_All	2 715 minus strand alanine-glyoxylate aminotransferase [Aedes aegypti] >gi|108884056|gb|EAT48281.1| alanine-glyoxylate aminotransferase [Aedes aegypti]	1.520	Up	0.00318	25.851
Pyridoxal phosphate-dependent transferase, major region, subdomain 1	0.0122629	CL2426.Contig2_All	1 1044 PREDICTED: similar to aromatic amino acid decarboxylase [Tribolium castaneum]	1.660	Up	0.00998	39.698
Pyridoxal phosphate-dependent transferase, major region, subdomain 1	0.0122629	CL1212.Contig1_All	172 1263 minus strand AGAP003688-PA [Anopheles gambiae str. PEST] >gi|157017532|gb|EAA08948.4| AGAP003688-PA [Anopheles gambiae str. PEST]	1.798	Up	0.00461	40.45
Pyridoxal phosphate-dependent transferase, major region, subdomain 1	0.0122629	CL750.Contig1_All	387 1769 minus strand PREDICTED: similar to 4-aminobutyrate aminotransferase [Tribolium castaneum]	1.518	Up	0.000565	51.43
Pyridoxal phosphate-dependent transferase, major region, subdomain 1	0.0122629	Unigene3580_All	77 1495 minus strand kynurenine aminotransferase [Glossina morsitans morsitans]	1.320	Up	0.00231	53.372
Pyridoxal phosphate-dependent transferase, major region, subdomain 1	0.0122629	CL2400.Contig1_All	276 1712 minus strand PREDICTED: alanine aminotransferase 2-like [Acyrthosiphon pisum]	1.236	Up	0.0202	53.876
NOP5, N-terminal	0.102958	Unigene7803_All	121 1590 minus strand PREDICTED: nucleolar protein 56-like [Nasonia vitripennis]	1.312	Up	0.0126	54.898
NOP5, N-terminal	0.102958	Unigene3430_All	122 673 PREDICTED: nucleolar protein 58-like [Nasonia vitripennis]	1.316	Up	0.0113	20.587
AMP-dependent synthetase/ligase	0.403256	Unigene12582_All	160 1671 minus strand luciferin 4-monooxygenase [Danaus plexippus]	1.266	Up	0.00475	56.355
AMP-dependent synthetase/ligase	0.403256	Unigene14866_All	62 784 PREDICTED: long-chain-fatty-acid--CoA ligase 1-like [Apis mellifera]	1.266	Up	0.0163	26.934
AMP-dependent synthetase/ligase	0.403256	CL3245.Contig1_All	109 1668 minus strand AMP dependent coa ligase [Aedes aegypti] >gi|108884645|gb|EAT48870.1| AMP dependent coa ligase [Aedes aegypti]	1.502	Up	0.00224	57.952
Synapsin, ATP-binding domain	0.102958	CL5228.Contig2_All	2 760 PREDICTED: similar to Synapsin CG3985-PE [Tribolium castaneum]	1.540	Up	0.0173	28.671
Synapsin, ATP-binding domain	0.102958	Unigene9192_All	2 388 PREDICTED: synapsin-like [Bombus impatiens]	1.409	Up	0.00094	13.864
Peptidase M14, carboxypeptidase A	0.352692	Unigene5688_All	195 1283 Carboxypeptidase B [Camponotus floridanus]	2.957	Up	7.5e-05	41.14
Peptidase M14, carboxypeptidase A	0.352692	Unigene14000_All	69 1217 minus strand molting fluid carboxypeptidase A precursor [Bombyx mori] >gi|54114893|dbj|BAD60916.1| molting fluid carboxypeptidase A [Bombyx mori]	1.329	Up	0.0358	43.859
Peptidase M1, membrane alanine aminopeptidase, N-terminal	0.148109	Unigene6391_All	80 2734 minus strand PREDICTED: endoplasmic reticulum aminopeptidase 2-like [Acyrthosiphon pisum]	1.276	Up	0.0109	100.35
Peptidase M1, membrane alanine aminopeptidase, N-terminal	0.148109	Unigene25864_All	3 767 minus strand Aminopeptidase N [Harpegnathos saltator]	1.246	Up	0.0448	29.413
Peptidase M1, membrane alanine aminopeptidase, N-terminal	0.148109	CL3835.Contig1_All	87 2759 minus strand PREDICTED: similar to protease m1 zinc metalloprotease [Tribolium castaneum]	2.202	Up	0.0312	103.68
PWWP domain	0.195359	Unigene4424_All	192 1826 3-hydroxyisobutyrate dehydrogenase [Aedes aegypti] >gi|108877486|gb|EAT41711.1| 3-hydroxyisobutyrate dehydrogenase [Aedes aegypti]	1.219	Up	0.0184	59.562
PWWP domain	0.195359	CL5037.Contig1_All	123 4115 minus strand AGAP001455-PC [Anopheles gambiae str. PEST] >gi|333470279|gb|EGK97570.1| AGAP001455-PC [Anopheles gambiae str. PEST]	1.268	Up	0.0367	147.32
Acyl-CoA dehydrogenase/oxidase C-terminal	0.419462	Unigene2139_All	163 2151 minus strand PREDICTED: similar to acyl-CoA oxidase [Tribolium castaneum]	1.235	Up	0.0186	75.236
Acyl-CoA dehydrogenase/oxidase C-terminal	0.419462	Unigene1599_All	"48 1271 PREDICTED: isovaleryl-CoA dehydrogenase, mitochondrial-like [Bombus impatiens]"	1.336	Up	0.0295	44.821
Transferrin-like domain	0.0490044	Unigene16_All	118 741 Ovotransferrin [Harpegnathos saltator]	1.314	Up	0.0158	23.226
Transferrin-like domain	0.0490044	Unigene32141_All	10 576 minus strand PREDICTED: melanotransferrin [Nasonia vitripennis]	1.279	Up	0.00964	21.217
Transferrin-like domain	0.0490044	Unigene28949_All	2 337 PREDICTED: serotransferrin isoform 1 [Sus scrofa]	3.710	Up	0.0019	12.464
EF-hand domain	0.413636	Unigene8450_All	86 2113 minus strand PREDICTED: calcium-binding mitochondrial carrier protein Aralar1 [Apis mellifera]	1.246	Up	0.00331	75.277
EF-hand domain	0.413636	Unigene9929_All	118 729 PREDICTED: myosin regulatory light chain 2-like [Bombus terrestris]	1.240	Up	0.028	22.268
EF-hand domain	0.413636	Unigene11800_All	169 627 minus strand troponin C-like [Acyrthosiphon pisum] >gi|239790194|dbj|BAH71673.1| ACYPI007392 [Acyrthosiphon pisum]	2.002	Up	0.00554	17.224
EF-hand domain	0.413636	Unigene17816_All	3 311 minus strand PREDICTED: similar to hippocalcin [Tribolium castaneum]	1.320	Up	0.000229	11.747
Glucose-methanol-choline oxidoreductase, N-terminal	0.450229	Unigene2236_All	208 1902 PREDICTED: glucose dehydrogenase [acceptor]-like isoform 1 [Acyrthosiphon pisum] >gi|328705616|ref|XP_003242858.1| PREDICTED: glucose dehydrogenase [acceptor]-like isoform 2 [Acyrthosiphon pisum]	1.386	Up	0.0329	62.685
Glucose-methanol-choline oxidoreductase, N-terminal	0.450229	CL3352.Contig3_All	283 2016 minus strand Glucose dehydrogenase [acceptor] [Harpegnathos saltator]	2.064	Up	0.02	63.667
Metallo-dependent phosphatase-like	0.245803	Unigene22151_All	114 1052 minus strand PREDICTED: serine/threonine-protein phosphatase 2B catalytic subunit 3-like [Acyrthosiphon pisum]	1.254	Up	0.0246	35.707
Metallo-dependent phosphatase-like	0.245803	CL4953.Contig1_All	3 575 PREDICTED: serine/threonine-protein phosphatase 2B catalytic subunit 3-like [Nasonia vitripennis]	1.249	Up	0.0034	21.233
Metallo-dependent phosphatase-like	0.245803	Unigene10540_All	49 1608 79 kDa salivary apyrase precursor [Triatoma infestans]	1.353	Up	0.0176	57.061
Peptidase C1A, papain C-terminal	0.195738	CL1335.Contig2_All	123 1127 GH22826 [Drosophila grimshawi] >gi|193899288|gb|EDV98154.1| GH22826 [Drosophila grimshawi]	1.671	Up	0.0298	37.454
Peptidase C1A, papain C-terminal	0.195738	CL5255.Contig1_All	2 733 cathepsin L-like cysteine protease 1 [Plautia stali]	5.476	Up	0.000372	27.166
Peptidase C1A, papain C-terminal	0.195738	Unigene16075_All	173 1174 minus strand cathepsin L-like cysteine protease 2 [Plautia stali]	1.206	Up	0.0277	37.586
Peptidase C1A, papain C-terminal	0.195738	Unigene18171_All	96 1094 minus strand cathepsin b [Aedes aegypti] >gi|54289254|gb|AAV31917.1| lysosomal cathepsin B [Aedes aegypti] >gi|108874249|gb|EAT38474.1| cathepsin b [Aedes aegypti]	1.594	Up	0.0212	36.55
Glutathione S-transferase, N-terminal	0.245803	Unigene1270_All	1 462 glutathione S-transferase sigma 3 [Locusta migratoria]	1.280	Up	0.014	17.16
Glutathione S-transferase, N-terminal	0.245803	Unigene6996_All	81 242 minus strand glutathione S-transferase S2 [Laodelphax striatellus]	1.418	Up	0.0256	6.5176
Glutathione S-transferase, N-terminal	0.245803	Unigene18246_All	161 760 glutathione S-transferase-like [Acyrthosiphon pisum] >gi|239790948|dbj|BAH72002.1| ACYPI002679 [Acyrthosiphon pisum]	1.518	Up	0.0396	24.096
Aminotransferase, class I/classII	0.386981	Unigene3580_All	77 1495 minus strand kynurenine aminotransferase [Glossina morsitans morsitans]	1.320	Up	0.00231	53.372
Aminotransferase, class I/classII	0.386981	CL2400.Contig1_All	276 1712 minus strand PREDICTED: alanine aminotransferase 2-like [Acyrthosiphon pisum]	1.236	Up	0.0202	53.876
Serine proteases, trypsin domain	4.45529e-11	Unigene10388_All	2 361 minus strand PREDICTED: venom serine protease 34 [Apis mellifera]	1.390	Up	0.0454	13.046
Serine proteases, trypsin domain	4.45529e-11	Unigene18009_All	1 708 minus strand trypsin precursor LlGtP1 [Lygus lineolaris]	1.605	Up	0.0142	26.422
Serine proteases, trypsin domain	4.45529e-11	Unigene1559_All	93 848 minus strand salivary trypsin [Triatoma matogrossensis]	1.469	Up	0.00676	28.054
Serine proteases, trypsin domain	4.45529e-11	Unigene3411_All	2 721 minus strand trypsin precursor LlSgP4 [Lygus lineolaris]	1.703	Up	0.00225	26.811
Serine proteases, trypsin domain	4.45529e-11	CL3794.Contig2_All	76 906 trypsin precursor LlGtP1 [Lygus lineolaris]	1.572	Up	0.023	30.773
Serine proteases, trypsin domain	4.45529e-11	Unigene13874_All	1 726 trypsin precursor LlSgP4 [Lygus lineolaris]	1.530	Up	0.00491	26.801
Serine proteases, trypsin domain	4.45529e-11	Unigene1577_All	53 862 minus strand trypsin precursor LlSgP3 [Lygus lineolaris]	1.651	Up	0.0492	29.989
Serine proteases, trypsin domain	4.45529e-11	CL1236.Contig2_All	26 334 salivary trypsin [Triatoma infestans]	1.451	Up	0.0132	11.226
Serine proteases, trypsin domain	4.45529e-11	CL2683.Contig1_All	3 557 minus strand serine protease [Laccotrephes japonensis]	1.575	Up	0.00338	20.491
Serine proteases, trypsin domain	4.45529e-11	CL1296.Contig1_All	69 848 trypsin precursor LlSgP4 [Lygus lineolaris]	1.682	Up	0.0299	28.698
Serine proteases, trypsin domain	4.45529e-11	CL184.Contig3_All	103 984 minus strand secreted salivary trypsin [Triatoma matogrossensis]	2.021	Up	0.0175	32.214
Serine proteases, trypsin domain	4.45529e-11	Unigene13889_All	1 714 minus strand trypsin-like protease [Ranatra unicolor]	1.330	Up	0.0424	26.457
Serine proteases, trypsin domain	4.45529e-11	CL515.Contig1_All	5 706 minus strand trypsin precursor LlSgP3 [Lygus lineolaris]	1.681	Up	0.0214	25.644
Serine proteases, trypsin domain	4.45529e-11	CL1296.Contig3_All	111 866 trypsin precursor LlSgP4 [Lygus lineolaris]	1.754	Up	0.0419	27.783
Serine proteases, trypsin domain	4.45529e-11	Unigene18257_All	90 848 minus strand trypsin-like protease [Ranatra unicolor]	1.656	Up	0.0351	28.034
Serine proteases, trypsin domain	4.45529e-11	Unigene10407_All	202 387 minus strand GH14281 [Drosophila grimshawi] >gi|193892526|gb|EDV91392.1| GH14281 [Drosophila grimshawi]	1.422	Up	0.0428	6.7216
Serine proteases, trypsin domain	4.45529e-11	Unigene9720_All	1 351 trypsin precursor LlGtP1 [Lygus lineolaris]	1.314	Up	0.00295	12.677
Serine proteases, trypsin domain	4.45529e-11	CL3674.Contig2_All	79 1200 minus strand PREDICTED: serine proteinase stubble [Apis mellifera]	1.249	Up	0.0176	41.28
Serine proteases, trypsin domain	4.45529e-11	CL1553.Contig1_All	3 725 trypsin precursor LlSgP4 [Lygus lineolaris]	1.437	Up	0.0179	26.551
Serine proteases, trypsin domain	4.45529e-11	Unigene2103_All	161 1036 minus strand secreted salivary trypsin [Triatoma matogrossensis]	1.650	Up	0.0126	32.091
Serine proteases, trypsin domain	4.45529e-11	Unigene18721_All	2 373 minus strand trypsin precursor LlSgP4 [Lygus lineolaris]	1.758	Up	0.0116	13.846
Serine proteases, trypsin domain	4.45529e-11	Unigene9788_All	127 537 Plasma kallikrein [Camponotus floridanus]	1.402	Up	0.0294	15.461
Serine proteases, trypsin domain	4.45529e-11	CL2568.Contig2_All	95 1120 minus strand serine proteinase [Rhodnius prolixus]	1.684	Up	0.0286	36.881
Serine proteases, trypsin domain	4.45529e-11	Unigene2476_All	9 2690 minus strand Neurotrypsin [Camponotus floridanus]	1.279	Up	0.00891	98.5
Glutathione S-transferase, C-terminal	0.624616	Unigene1270_All	1 462 glutathione S-transferase sigma 3 [Locusta migratoria]	1.280	Up	0.014	17.16
Glutathione S-transferase, C-terminal	0.624616	Unigene18246_All	161 760 glutathione S-transferase-like [Acyrthosiphon pisum] >gi|239790948|dbj|BAH72002.1| ACYPI002679 [Acyrthosiphon pisum]	1.518	Up	0.0396	24.096
Aldehyde/histidinol dehydrogenase	0.533126	Unigene17115_All	204 1901 minus strand PREDICTED: similar to pyrroline-5-carboxylate dehydrogenase [Tribolium castaneum]	1.216	Up	0.00739	62.781
Aldehyde/histidinol dehydrogenase	0.533126	Unigene1515_All	49 1545 minus strand GH13324 [Drosophila grimshawi] >gi|193900077|gb|EDV98943.1| GH13324 [Drosophila grimshawi]	1.720	Up	0.0044	55.04
FAD/NAD(P)-binding domain	0.258851	Unigene2236_All	208 1902 PREDICTED: glucose dehydrogenase [acceptor]-like isoform 1 [Acyrthosiphon pisum] >gi|328705616|ref|XP_003242858.1| PREDICTED: glucose dehydrogenase [acceptor]-like isoform 2 [Acyrthosiphon pisum]	1.386	Up	0.0329	62.685
FAD/NAD(P)-binding domain	0.258851	Unigene10742_All	23 832 Glucose dehydrogenase [acceptor] [Harpegnathos saltator]	1.300	Up	0.0155	30.221
FAD/NAD(P)-binding domain	0.258851	CL3352.Contig3_All	283 2016 minus strand Glucose dehydrogenase [acceptor] [Harpegnathos saltator]	2.064	Up	0.02	63.667
FAD/NAD(P)-binding domain	0.258851	CL1917.Contig1_All	223 1527 FAD-dependent oxidoreductase domain-containing protein 1 [Camponotus floridanus]	1.427	Up	0.0151	48.359
FAD/NAD(P)-binding domain	0.258851	CL3383.Contig3_All	152 1546 minus strand PREDICTED: peroxisomal N(1)-acetyl-spermine/spermidine oxidase-like [Bombus terrestris]	1.592	Up	0.00239	52.216
FAS1 domain	0.237942	Unigene3600_All	355 2256 minus strand PREDICTED: similar to midline fasciclin [Tribolium castaneum]	1.731	Up	0.0122	69.976
FAS1 domain	0.237942	Unigene2547_All	3 1589 RecName: Full=Fasciclin-1; AltName: Full=Fasciclin I; Short=FAS I; Short=FCN; Flags: Precursor >gi|160847|gb|AAA29809.1| FCN I precursor [Schistocerca americana]	1.238	Up	0.0492	60.996
Histidine kinase-like ATPase, C-terminal domain	0.237942	Unigene23858_All	1 762 PREDICTED: Pyruvate dehydrogenase [lipoamide] kinase-like isoform 1 [Nasonia vitripennis]	1.243	Up	0.00814	29.697
Histidine kinase-like ATPase, C-terminal domain	0.237942	Unigene13217_All	2 277 GK15747 [Drosophila willistoni] >gi|194159819|gb|EDW74720.1| GK15747 [Drosophila willistoni]	1.212	Up	0.034	10.057
Calcineurin-like phosphoesterase domain, ApaH type	0.533126	Unigene22151_All	114 1052 minus strand PREDICTED: serine/threonine-protein phosphatase 2B catalytic subunit 3-like [Acyrthosiphon pisum]	1.254	Up	0.0246	35.707
Calcineurin-like phosphoesterase domain, ApaH type	0.533126	Unigene10540_All	49 1608 79 kDa salivary apyrase precursor [Triatoma infestans]	1.353	Up	0.0176	57.061
Aldehyde oxidase/xanthine dehydrogenase, a/b hammerhead	0.150408	Unigene8465_All	23 1945 minus strand PREDICTED: aldehyde oxidase-like [Bombus terrestris]	1.583	Up	0.00291	71.07
Aldehyde oxidase/xanthine dehydrogenase, a/b hammerhead	0.150408	Unigene28262_All	4 789 minus strand Xanthine dehydrogenase/oxidase [Harpegnathos saltator]	1.569	Up	0.00479	29.176
SCP2 sterol-binding domain	0.278281	Unigene9653_All	154 534 PREDICTED: non-specific lipid-transfer protein-like [Acyrthosiphon pisum]	1.313	Up	0.0273	13.812
SCP2 sterol-binding domain	0.278281	Unigene15988_All	183 596 minus strand PREDICTED: non-specific lipid-transfer protein-like isoform 2 [Bombus impatiens]	2.178	Up	0.00306	15.244
Alpha/Beta hydrolase fold	0.0309059	CL1175.Contig2_All	40 1677 minus strand PREDICTED: venom carboxylesterase-6-like [Acyrthosiphon pisum]	3.275	Up	6.51e-05	60.539
Alpha/Beta hydrolase fold	0.0309059	CL3657.Contig1_All	27 878 minus strand PREDICTED: serine hydrolase-like protein-like [Nasonia vitripennis]	1.202	Up	0.0183	32.646
Alpha/Beta hydrolase fold	0.0309059	Unigene16828_All	12 1808 PREDICTED: similar to fatty acid synthase [Tribolium castaneum]	1.555	Up	0.0207	65.315
Alpha/Beta hydrolase fold	0.0309059	Unigene12628_All	162 1289 PREDICTED: similar to phosphatidylcholine-sterol acyltransferase (lecithin-cholesterol acyltransferase) [Tribolium castaneum]	1.325	Up	0.0165	42.257
Alpha/Beta hydrolase fold	0.0309059	Unigene9896_All	240 1625 PREDICTED: similar to thymus-specific serine protease [Tribolium castaneum]	1.296	Up	0.0293	52.646
Alpha/Beta hydrolase fold	0.0309059	CL3451.Contig2_All	91 1731 PREDICTED: venom carboxylesterase-6-like [Acyrthosiphon pisum]	1.547	Up	0.00829	60.716
Alpha/Beta hydrolase fold	0.0309059	Unigene2287_All	128 1234 Protein phosphatase methylesterase 1 [Harpegnathos saltator]	1.258	Up	0.00337	40.839
Alpha/Beta hydrolase fold	0.0309059	Unigene3619_All	61 1584 PREDICTED: venom carboxylesterase-6-like [Bombus impatiens]	1.797	Up	0.0227	56.908
Alpha/Beta hydrolase fold	0.0309059	CL5229.Contig2_All	50 1021 minus strand PREDICTED: venom carboxylesterase-6 isoform 1 [Nasonia vitripennis] >gi|345497206|ref|XP_003427935.1| PREDICTED: venom carboxylesterase-6 isoform 2 [Nasonia vitripennis]	1.236	Up	0.031	35.358
Alpha/Beta hydrolase fold	0.0309059	CL3836.Contig1_All	111 1340 minus strand PREDICTED: venom serine carboxypeptidase-like [Bombus terrestris]	4.260	Up	0.000847	46.988
Alpha/Beta hydrolase fold	0.0309059	CL3836.Contig3_All	105 1325 PREDICTED: venom serine carboxypeptidase-like [Bombus terrestris]	5.307	Up	4.49e-05	46.684
PB1 domain	0.237942	CL3562.Contig2_All	277 1620 Sequestosome-1 [Harpegnathos saltator]	1.358	Up	0.0184	48.208
PB1 domain	0.237942	CL2112.Contig3_All	168 890 minus strand PREDICTED: similar to Tfg protein [Strongylocentrotus purpuratus] >gi|115939357|ref|XP_001184419.1| PREDICTED: similar to Tfg protein [Strongylocentrotus purpuratus]	1.232	Up	0.0408	27.043
Proteinase propeptide inhibitor	0.150408	Unigene5688_All	195 1283 Carboxypeptidase B [Camponotus floridanus]	2.957	Up	7.5e-05	41.14
Proteinase propeptide inhibitor	0.150408	Unigene14000_All	69 1217 minus strand molting fluid carboxypeptidase A precursor [Bombyx mori] >gi|54114893|dbj|BAD60916.1| molting fluid carboxypeptidase A [Bombyx mori]	1.329	Up	0.0358	43.859
Serum albumin-like	0.150408	Unigene32074_All	3 674 minus strand albumin [Sus scrofa domesticus]	3.403	Up	0.00578	25.238
Serum albumin-like	0.150408	Unigene28901_All	2 229 minus strand albumin [Sus scrofa]	4.611	Up	0.0354	8.5354
Glucose-methanol-choline oxidoreductase, C-terminal	0.12965	Unigene2236_All	208 1902 PREDICTED: glucose dehydrogenase [acceptor]-like isoform 1 [Acyrthosiphon pisum] >gi|328705616|ref|XP_003242858.1| PREDICTED: glucose dehydrogenase [acceptor]-like isoform 2 [Acyrthosiphon pisum]	1.386	Up	0.0329	62.685
Glucose-methanol-choline oxidoreductase, C-terminal	0.12965	Unigene10742_All	23 832 Glucose dehydrogenase [acceptor] [Harpegnathos saltator]	1.300	Up	0.0155	30.221
Glucose-methanol-choline oxidoreductase, C-terminal	0.12965	CL3352.Contig3_All	283 2016 minus strand Glucose dehydrogenase [acceptor] [Harpegnathos saltator]	2.064	Up	0.02	63.667
AMP-binding enzyme C-terminal domain	0.603571	Unigene12582_All	160 1671 minus strand luciferin 4-monooxygenase [Danaus plexippus]	1.266	Up	0.00475	56.355
AMP-binding enzyme C-terminal domain	0.603571	CL3245.Contig1_All	109 1668 minus strand AMP dependent coa ligase [Aedes aegypti] >gi|108884645|gb|EAT48870.1| AMP dependent coa ligase [Aedes aegypti]	1.502	Up	0.00224	57.952
Aldehyde dehydrogenase domain	0.533126	Unigene17115_All	204 1901 minus strand PREDICTED: similar to pyrroline-5-carboxylate dehydrogenase [Tribolium castaneum]	1.216	Up	0.00739	62.781
Aldehyde dehydrogenase domain	0.533126	Unigene1515_All	49 1545 minus strand GH13324 [Drosophila grimshawi] >gi|193900077|gb|EDV98943.1| GH13324 [Drosophila grimshawi]	1.720	Up	0.0044	55.04
Pyridoxal phosphate-dependent transferase, major region, subdomain 2	0.00400248	Unigene6523_All	2 715 minus strand alanine-glyoxylate aminotransferase [Aedes aegypti] >gi|108884056|gb|EAT48281.1| alanine-glyoxylate aminotransferase [Aedes aegypti]	1.520	Up	0.00318	25.851
Pyridoxal phosphate-dependent transferase, major region, subdomain 2	0.00400248	CL2426.Contig2_All	1 1044 PREDICTED: similar to aromatic amino acid decarboxylase [Tribolium castaneum]	1.660	Up	0.00998	39.698
Pyridoxal phosphate-dependent transferase, major region, subdomain 2	0.00400248	CL1212.Contig1_All	172 1263 minus strand AGAP003688-PA [Anopheles gambiae str. PEST] >gi|157017532|gb|EAA08948.4| AGAP003688-PA [Anopheles gambiae str. PEST]	1.798	Up	0.00461	40.45
Pyridoxal phosphate-dependent transferase, major region, subdomain 2	0.00400248	CL750.Contig1_All	387 1769 minus strand PREDICTED: similar to 4-aminobutyrate aminotransferase [Tribolium castaneum]	1.518	Up	0.000565	51.43
Pyridoxal phosphate-dependent transferase, major region, subdomain 2	0.00400248	Unigene3580_All	77 1495 minus strand kynurenine aminotransferase [Glossina morsitans morsitans]	1.320	Up	0.00231	53.372
Pyridoxal phosphate-dependent transferase, major region, subdomain 2	0.00400248	CL2400.Contig1_All	276 1712 minus strand PREDICTED: alanine aminotransferase 2-like [Acyrthosiphon pisum]	1.236	Up	0.0202	53.876
NADP-dependent oxidoreductase domain	0.0946544	Unigene9980_All	96 1034 minus strand PREDICTED: similar to CG6084 CG6084-PA [Tribolium castaneum]	1.308	Up	0.00448	35.758
NADP-dependent oxidoreductase domain	0.0946544	Unigene18282_All	400 1320 PREDICTED: similar to CG6084 CG6084-PA [Tribolium castaneum]	1.300	Up	0.00649	34.703
NADP-dependent oxidoreductase domain	0.0946544	CL3965.Contig2_All	136 1092 minus strand PREDICTED: alcohol dehydrogenase [NADP+] A-like [Apis mellifera]	1.240	Up	0.0393	36.218
Carboxylesterase, type B	0.252352	CL1175.Contig2_All	40 1677 minus strand PREDICTED: venom carboxylesterase-6-like [Acyrthosiphon pisum]	3.275	Up	6.51e-05	60.539
Carboxylesterase, type B	0.252352	Unigene3619_All	61 1584 PREDICTED: venom carboxylesterase-6-like [Bombus impatiens]	1.797	Up	0.0227	56.908
Carboxylesterase, type B	0.252352	CL5229.Contig2_All	50 1021 minus strand PREDICTED: venom carboxylesterase-6 isoform 1 [Nasonia vitripennis] >gi|345497206|ref|XP_003427935.1| PREDICTED: venom carboxylesterase-6 isoform 2 [Nasonia vitripennis]	1.236	Up	0.031	35.358
Carboxylesterase, type B	0.252352	CL3451.Contig2_All	91 1731 PREDICTED: venom carboxylesterase-6-like [Acyrthosiphon pisum]	1.547	Up	0.00829	60.716
Carboxypeptidase, activation peptide	0.195359	Unigene5688_All	195 1283 Carboxypeptidase B [Camponotus floridanus]	2.957	Up	7.5e-05	41.14
Carboxypeptidase, activation peptide	0.195359	Unigene14000_All	69 1217 minus strand molting fluid carboxypeptidase A precursor [Bombyx mori] >gi|54114893|dbj|BAD60916.1| molting fluid carboxypeptidase A [Bombyx mori]	1.329	Up	0.0358	43.859
Peptidase S1, PA clan	1.3636e-11	Unigene10388_All	2 361 minus strand PREDICTED: venom serine protease 34 [Apis mellifera]	1.390	Up	0.0454	13.046
Peptidase S1, PA clan	1.3636e-11	Unigene18009_All	1 708 minus strand trypsin precursor LlGtP1 [Lygus lineolaris]	1.605	Up	0.0142	26.422
Peptidase S1, PA clan	1.3636e-11	Unigene1559_All	93 848 minus strand salivary trypsin [Triatoma matogrossensis]	1.469	Up	0.00676	28.054
Peptidase S1, PA clan	1.3636e-11	Unigene3411_All	2 721 minus strand trypsin precursor LlSgP4 [Lygus lineolaris]	1.703	Up	0.00225	26.811
Peptidase S1, PA clan	1.3636e-11	CL3794.Contig2_All	76 906 trypsin precursor LlGtP1 [Lygus lineolaris]	1.572	Up	0.023	30.773
Peptidase S1, PA clan	1.3636e-11	Unigene13874_All	1 726 trypsin precursor LlSgP4 [Lygus lineolaris]	1.530	Up	0.00491	26.801
Peptidase S1, PA clan	1.3636e-11	Unigene1577_All	53 862 minus strand trypsin precursor LlSgP3 [Lygus lineolaris]	1.651	Up	0.0492	29.989
Peptidase S1, PA clan	1.3636e-11	CL1236.Contig2_All	26 334 salivary trypsin [Triatoma infestans]	1.451	Up	0.0132	11.226
Peptidase S1, PA clan	1.3636e-11	CL2683.Contig1_All	3 557 minus strand serine protease [Laccotrephes japonensis]	1.575	Up	0.00338	20.491
Peptidase S1, PA clan	1.3636e-11	CL1296.Contig1_All	69 848 trypsin precursor LlSgP4 [Lygus lineolaris]	1.682	Up	0.0299	28.698
Peptidase S1, PA clan	1.3636e-11	CL184.Contig3_All	103 984 minus strand secreted salivary trypsin [Triatoma matogrossensis]	2.021	Up	0.0175	32.214
Peptidase S1, PA clan	1.3636e-11	Unigene13889_All	1 714 minus strand trypsin-like protease [Ranatra unicolor]	1.330	Up	0.0424	26.457
Peptidase S1, PA clan	1.3636e-11	CL515.Contig1_All	5 706 minus strand trypsin precursor LlSgP3 [Lygus lineolaris]	1.681	Up	0.0214	25.644
Peptidase S1, PA clan	1.3636e-11	CL1296.Contig3_All	111 866 trypsin precursor LlSgP4 [Lygus lineolaris]	1.754	Up	0.0419	27.783
Peptidase S1, PA clan	1.3636e-11	Unigene18257_All	90 848 minus strand trypsin-like protease [Ranatra unicolor]	1.656	Up	0.0351	28.034
Peptidase S1, PA clan	1.3636e-11	Unigene10407_All	202 387 minus strand GH14281 [Drosophila grimshawi] >gi|193892526|gb|EDV91392.1| GH14281 [Drosophila grimshawi]	1.422	Up	0.0428	6.7216
Peptidase S1, PA clan	1.3636e-11	Unigene9720_All	1 351 trypsin precursor LlGtP1 [Lygus lineolaris]	1.314	Up	0.00295	12.677
Peptidase S1, PA clan	1.3636e-11	CL3674.Contig2_All	79 1200 minus strand PREDICTED: serine proteinase stubble [Apis mellifera]	1.249	Up	0.0176	41.28
Peptidase S1, PA clan	1.3636e-11	Unigene34150_All	2 157 minus strand secreted salivary trypsin [Triatoma matogrossensis]	1.651	Up	0.0419	5.7005
Peptidase S1, PA clan	1.3636e-11	CL1553.Contig1_All	3 725 trypsin precursor LlSgP4 [Lygus lineolaris]	1.437	Up	0.0179	26.551
Peptidase S1, PA clan	1.3636e-11	Unigene2103_All	161 1036 minus strand secreted salivary trypsin [Triatoma matogrossensis]	1.650	Up	0.0126	32.091
Peptidase S1, PA clan	1.3636e-11	Unigene18721_All	2 373 minus strand trypsin precursor LlSgP4 [Lygus lineolaris]	1.758	Up	0.0116	13.846
Peptidase S1, PA clan	1.3636e-11	Unigene9788_All	127 537 Plasma kallikrein [Camponotus floridanus]	1.402	Up	0.0294	15.461
Peptidase S1, PA clan	1.3636e-11	CL2568.Contig2_All	95 1120 minus strand serine proteinase [Rhodnius prolixus]	1.684	Up	0.0286	36.881
Peptidase S1, PA clan	1.3636e-11	Unigene2476_All	9 2690 minus strand Neurotrypsin [Camponotus floridanus]	1.279	Up	0.00891	98.5
