# Supplementary material for: Differential Proteomics Analysis Unraveled Mechanisms of Arma chinensis Responding to Improved Artificial Diet
Source: Insects. 2022 Jul 2;13(7):605. doi: 10.3390/insects13070605 (PMC9319121; doi:10.3390/insects13070605)
Supplement: Supplementary file 1 [file insects-13-00605-s001.zip › Supplementary Table S15.xlsx]

## Sheet: Down Domain2Protein
Table S15. Protein domain enrichment analysis for the down-regulated DEPs in IADA/COSMA.
Domain Description	Fisher's exact test p value	Protein accession	Protein description	IADA/COSMA Ratio	Regulated Type	IADA/COSMA P value	MW [kDa]
Small GTP-binding protein domain	0.363489	Unigene448_All	175 720 ADP-ribosylation factor [Bombyx mori] >gi|87248075|gb|ABD36090.1| ADP-ribosylation factor [Bombyx mori] >gi|357363768|gb|AET74048.1| ADP-ribosylation factor [Spodoptera exigua]	0.796	Down	0.000506	20.72
Small GTP-binding protein domain	0.363489	CL3558.Contig1_All	130 648 minus strand PREDICTED: ADP-ribosylation factor-related protein 1-like [Nasonia vitripennis]	0.824	Down	0.0293	19.617
Small GTP-binding protein domain	0.363489	Unigene17152_All	326 865 minus strand ADP-ribosylation factor 4 [Trichinella spiralis] >gi|316976817|gb|EFV60026.1| ADP-ribosylation factor 4 [Trichinella spiralis]	0.806	Down	0.0112	20.634
Aspartic peptidase domain	0.195987	Unigene3551_All	221 1162 PREDICTED: cathepsin D-like [Oreochromis niloticus]	0.665	Down	0.0337	35.564
Aspartic peptidase domain	0.195987	Unigene14022_All	40 1200 minus strand PREDICTED: lysosomal aspartic protease [Apis mellifera]	0.635	Down	0.00549	42.106
Hemocyanin, C-terminal	4.46195e-06	Unigene12882_All	105 2138 phenoloxidase subunit A3 [Apis mellifera] >gi|41350389|gb|AAO72539.2| prophenoloxidase [Apis mellifera]	0.675	Down	0.00641	78.555
Hemocyanin, C-terminal	4.46195e-06	CL3376.Contig1_All	3 2078 cyanoprotein beta subunit precursor [Riptortus clavatus]	0.185	Down	0.0012	80.277
Hemocyanin, C-terminal	4.46195e-06	Unigene14079_All	2 1435 prophenoloxidase [Tenebrio molitor]	0.679	Down	0.0176	55.465
Hemocyanin, C-terminal	4.46195e-06	Unigene16109_All	52 2097 minus strand pro-phenol oxidase subunit 2 [Tribolium castaneum] >gi|70999576|gb|AAX84205.1| pro-phenol oxidase subunit 2 [Tribolium castaneum]	0.768	Down	0.015	79.041
Hemocyanin, C-terminal	4.46195e-06	CL3376.Contig2_All	9 2084 cyanoprotein beta subunit precursor [Riptortus clavatus]	0.147	Down	0.00251	80.151
ABC transporter-like	0.562462	Unigene8763_All	251 2038 minus strand PREDICTED: similar to abc transporter [Tribolium castaneum]	0.515	Down	0.00141	67.419
ABC transporter-like	0.562462	Unigene5691_All	214 2238 PREDICTED: ATP-binding cassette sub-family G member 4-like isoform 2 [Acyrthosiphon pisum]	0.636	Down	0.00125	75.268
Immunoglobulin E-set	0.000988111	Unigene12882_All	105 2138 phenoloxidase subunit A3 [Apis mellifera] >gi|41350389|gb|AAO72539.2| prophenoloxidase [Apis mellifera]	0.675	Down	0.00641	78.555
Immunoglobulin E-set	0.000988111	CL3376.Contig1_All	3 2078 cyanoprotein beta subunit precursor [Riptortus clavatus]	0.185	Down	0.0012	80.277
Immunoglobulin E-set	0.000988111	Unigene14079_All	2 1435 prophenoloxidase [Tenebrio molitor]	0.679	Down	0.0176	55.465
Immunoglobulin E-set	0.000988111	Unigene16109_All	52 2097 minus strand pro-phenol oxidase subunit 2 [Tribolium castaneum] >gi|70999576|gb|AAX84205.1| pro-phenol oxidase subunit 2 [Tribolium castaneum]	0.768	Down	0.015	79.041
Immunoglobulin E-set	0.000988111	Unigene10619_All	221 2323 minus strand PREDICTED: similar to transglutaminase [Tribolium castaneum]	0.638	Down	0.00093	78.62
Immunoglobulin E-set	0.000988111	CL3376.Contig2_All	9 2084 cyanoprotein beta subunit precursor [Riptortus clavatus]	0.147	Down	0.00251	80.151
Peptidase family A1 domain	0.176242	Unigene3551_All	221 1162 PREDICTED: cathepsin D-like [Oreochromis niloticus]	0.665	Down	0.0337	35.564
Peptidase family A1 domain	0.176242	Unigene14022_All	40 1200 minus strand PREDICTED: lysosomal aspartic protease [Apis mellifera]	0.635	Down	0.00549	42.106
CRAL-TRIO lipid binding domain	0.119213	Unigene12098_All	120 971 minus strand PREDICTED: similar to CRALBP [Tribolium castaneum]	0.593	Down	0.00399	32.781
CRAL-TRIO lipid binding domain	0.119213	CL198.Contig2_All	110 982 CRAL/TRIO domain-containing protein [Culex quinquefasciatus] >gi|167869862|gb|EDS33245.1| CRAL/TRIO domain-containing protein [Culex quinquefasciatus]	0.767	Down	0.0339	34.003
CRAL-TRIO lipid binding domain	0.119213	Unigene18271_All	296 1135 minus strand CRAL/TRIO domain-containing protein [Culex quinquefasciatus] >gi|167869862|gb|EDS33245.1| CRAL/TRIO domain-containing protein [Culex quinquefasciatus]	0.699	Down	0.041	32.166
Mitochondrial carrier domain	0.135342	Unigene2479_All	1 591 minus strand Solute carrier family 25 member 35 [Harpegnathos saltator]	0.802	Down	0.0195	21.322
Mitochondrial carrier domain	0.135342	Unigene2526_All	161 1030 minus strand PREDICTED: solute carrier family 25 member 42-like isoform 1 [Apis mellifera]	0.786	Down	0.0148	32.209
Mitochondrial carrier domain	0.135342	Unigene14883_All	192 1076 minus strand PREDICTED: similar to Mitochondrial 2-oxoglutarate/malate carrier protein (OGCP) (Solute carrier family 25 member 11) [Tribolium castaneum]	0.778	Down	0.0147	32.6
Alpha/Beta hydrolase fold	8.72377e-05	Unigene4654_All	1 1260 minus strand PREDICTED: esterase FE4-like isoform 1 [Acyrthosiphon pisum] >gi|328721620|ref|XP_003247358.1| PREDICTED: esterase FE4-like isoform 2 [Acyrthosiphon pisum] >gi|328721622|ref|XP_003247359.1| PREDICTED: esterase FE4-like isoform 3 [Acyrthosiphon pisum]	0.648	Down	0.0423	46.864
Alpha/Beta hydrolase fold	8.72377e-05	Unigene3640_All	4 1164 minus strand PREDICTED: venom carboxylesterase-6-like [Apis mellifera]	0.666	Down	0.0206	44.305
Alpha/Beta hydrolase fold	8.72377e-05	Unigene17059_All	65 1606 minus strand PREDICTED: venom carboxylesterase-6 isoform 1 [Nasonia vitripennis] >gi|345497206|ref|XP_003427935.1| PREDICTED: venom carboxylesterase-6 isoform 2 [Nasonia vitripennis]	0.752	Down	0.00137	58.293
Alpha/Beta hydrolase fold	8.72377e-05	Unigene18880_All	283 1161 minus strand UPF0554 protein C2orf43-like protein [Acromyrmex echinatior]	0.292	Down	0.000728	33.501
Alpha/Beta hydrolase fold	8.72377e-05	CL1448.Contig2_All	44 1624 minus strand PREDICTED: venom carboxylesterase-6 isoform 1 [Nasonia vitripennis] >gi|345497206|ref|XP_003427935.1| PREDICTED: venom carboxylesterase-6 isoform 2 [Nasonia vitripennis]	0.241	Down	0.000403	59.418
Alpha/Beta hydrolase fold	8.72377e-05	Unigene3621_All	148 1662 PREDICTED: venom carboxylesterase-6 isoform 1 [Nasonia vitripennis] >gi|345497206|ref|XP_003427935.1| PREDICTED: venom carboxylesterase-6 isoform 2 [Nasonia vitripennis]	0.430	Down	0.0163	57.034
Alpha/Beta hydrolase fold	8.72377e-05	Unigene5730_All	70 1629 minus strand PREDICTED: similar to juvenile hormone esterase [Tribolium castaneum]	0.455	Down	0.027	58.895
Alpha/Beta hydrolase fold	8.72377e-05	Unigene6419_All	65 1402 minus strand PREDICTED: similar to juvenile hormone epoxide hydrolase [Tribolium castaneum]	0.694	Down	0.0363	51.222
Alpha/Beta hydrolase fold	8.72377e-05	Unigene20213_All	254 1123 minus strand PREDICTED: similar to lethal (2) k09913 CG3082-PC [Tribolium castaneum]	0.511	Down	0.0057	33.35
Alpha/Beta hydrolase fold	8.72377e-05	Unigene20415_All	3 215 PREDICTED: similar to putative esterase [Tribolium castaneum] >gi|270008700|gb|EFA05148.1| hypothetical protein TcasGA2_TC015265 [Tribolium castaneum]	0.505	Down	0.0222	8.2283
Alpha/Beta hydrolase fold	8.72377e-05	CL355.Contig1_All	3 3932 PREDICTED: fatty acid synthase-like isoform 1 [Acyrthosiphon pisum]	0.662	Down	0.00132	144.71
AAA+ ATPase domain	0.380794	Unigene8763_All	251 2038 minus strand PREDICTED: similar to abc transporter [Tribolium castaneum]	0.515	Down	0.00141	67.419
AAA+ ATPase domain	0.380794	Unigene5691_All	214 2238 PREDICTED: ATP-binding cassette sub-family G member 4-like isoform 2 [Acyrthosiphon pisum]	0.636	Down	0.00125	75.268
AAA+ ATPase domain	0.380794	CL1207.Contig1_All	296 2851 minus strand PREDICTED: similar to AGAP010451-PA [Tribolium castaneum]	0.796	Down	0.0126	95.964
Alpha crystallin/Hsp20 domain	0.234082	CL5444.Contig2_All	154 690 minus strand small heat shock protein [Trialeurodes vaporariorum]	0.663	Down	0.0238	20.255
Alpha crystallin/Hsp20 domain	0.234082	CL1793.Contig1_All	330 818 minus strand heat shock protein 20.7 [Schistocerca gregaria]	0.403	Down	0.00509	18.188
6-phosphogluconate dehydrogenase C-terminal domain-like	0.270389	Unigene18208_All	"134 1579 minus strand 6-phosphogluconate dehydrogenase, decarboxylating [Acromyrmex echinatior]"	0.790	Down	0.00187	52.8
6-phosphogluconate dehydrogenase C-terminal domain-like	0.270389	Unigene2273_All	"147 1178 minus strand PREDICTED: glycerol-3-phosphate dehydrogenase [NAD+], cytoplasmic-like [Bombus impatiens]"	0.498	Down	0.00046	37.841
Hemocyanin/hexamerin middle domain	4.17733e-08	Unigene12882_All	105 2138 phenoloxidase subunit A3 [Apis mellifera] >gi|41350389|gb|AAO72539.2| prophenoloxidase [Apis mellifera]	0.675	Down	0.00641	78.555
Hemocyanin/hexamerin middle domain	4.17733e-08	CL3376.Contig1_All	3 2078 cyanoprotein beta subunit precursor [Riptortus clavatus]	0.185	Down	0.0012	80.277
Hemocyanin/hexamerin middle domain	4.17733e-08	Unigene14079_All	2 1435 prophenoloxidase [Tenebrio molitor]	0.679	Down	0.0176	55.465
Hemocyanin/hexamerin middle domain	4.17733e-08	Unigene16109_All	52 2097 minus strand pro-phenol oxidase subunit 2 [Tribolium castaneum] >gi|70999576|gb|AAX84205.1| pro-phenol oxidase subunit 2 [Tribolium castaneum]	0.768	Down	0.015	79.041
Hemocyanin/hexamerin middle domain	4.17733e-08	Unigene393_All	53 664 PREDICTED: phenoloxidase subunit A3-like [Bombus impatiens]	0.607	Down	0.00876	23.845
Hemocyanin/hexamerin middle domain	4.17733e-08	CL3376.Contig2_All	9 2084 cyanoprotein beta subunit precursor [Riptortus clavatus]	0.147	Down	0.00251	80.151
6-phosphogluconate dehydrogenase, domain 2	0.215263	Unigene18208_All	"134 1579 minus strand 6-phosphogluconate dehydrogenase, decarboxylating [Acromyrmex echinatior]"	0.790	Down	0.00187	52.8
6-phosphogluconate dehydrogenase, domain 2	0.215263	Unigene2273_All	"147 1178 minus strand PREDICTED: glycerol-3-phosphate dehydrogenase [NAD+], cytoplasmic-like [Bombus impatiens]"	0.498	Down	0.00046	37.841
Thiolase, N-terminal	0.156017	Unigene20022_All	2 574 minus strand PREDICTED: similar to AGAP006821-PA [Tribolium castaneum]	0.800	Down	0.0155	19.686
Thiolase, N-terminal	0.156017	Unigene8345_All	"3 317 PREDICTED: 3-ketoacyl-CoA thiolase, mitochondrial-like [Apis mellifera]"	0.752	Down	0.0244	11.709
Ribosomal protein S5 domain 2-type fold	0.529228	Unigene9891_All	106 2436 endoplasmin [Locusta migratoria]	0.832	Down	0.00286	88.485
Ribosomal protein S5 domain 2-type fold	0.529228	CL1207.Contig1_All	296 2851 minus strand PREDICTED: similar to AGAP010451-PA [Tribolium castaneum]	0.796	Down	0.0126	95.964
CRAL/TRIO, N-terminal domain	0.0814484	Unigene12098_All	120 971 minus strand PREDICTED: similar to CRALBP [Tribolium castaneum]	0.593	Down	0.00399	32.781
CRAL/TRIO, N-terminal domain	0.0814484	CL198.Contig2_All	110 982 CRAL/TRIO domain-containing protein [Culex quinquefasciatus] >gi|167869862|gb|EDS33245.1| CRAL/TRIO domain-containing protein [Culex quinquefasciatus]	0.767	Down	0.0339	34.003
CRAL/TRIO, N-terminal domain	0.0814484	Unigene18271_All	296 1135 minus strand CRAL/TRIO domain-containing protein [Culex quinquefasciatus] >gi|167869862|gb|EDS33245.1| CRAL/TRIO domain-containing protein [Culex quinquefasciatus]	0.699	Down	0.041	32.166
Tyrosinase copper-binding domain	0.00167364	Unigene12882_All	105 2138 phenoloxidase subunit A3 [Apis mellifera] >gi|41350389|gb|AAO72539.2| prophenoloxidase [Apis mellifera]	0.675	Down	0.00641	78.555
Tyrosinase copper-binding domain	0.00167364	Unigene14079_All	2 1435 prophenoloxidase [Tenebrio molitor]	0.679	Down	0.0176	55.465
Tyrosinase copper-binding domain	0.00167364	Unigene16109_All	52 2097 minus strand pro-phenol oxidase subunit 2 [Tribolium castaneum] >gi|70999576|gb|AAX84205.1| pro-phenol oxidase subunit 2 [Tribolium castaneum]	0.768	Down	0.015	79.041
Aldolase-type TIM barrel	0.505696	Unigene14014_All	"90 1181 fructose 1,6-bisphosphate aldolase [Schistocerca gregaria]"	0.831	Down	0.00275	39.841
Aldolase-type TIM barrel	0.505696	Unigene13998_All	168 1145 minus strand transaldolase [Aedes aegypti] >gi|108874520|gb|EAT38745.1| transaldolase [Aedes aegypti]	0.751	Down	0.00357	36.463
GroES-like	0.0485937	Unigene20070_All	"234 536 PREDICTED: 10 kDa heat shock protein, mitochondrial-like [Nasonia vitripennis]"	0.767	Down	0.00883	10.875
GroES-like	0.0485937	Unigene5698_All	149 1282 minus strand PREDICTED: alcohol dehydrogenase class-3 [Apis mellifera]	0.778	Down	0.0225	40.6
GroES-like	0.0485937	CL355.Contig1_All	3 3932 PREDICTED: fatty acid synthase-like isoform 1 [Acyrthosiphon pisum]	0.662	Down	0.00132	144.71
Rossmann-like alpha/beta/alpha sandwich fold	0.603187	Unigene12426_All	"6 668 Cysteinyl-tRNA synthetase, cytoplasmic [Camponotus floridanus]"	0.748	Down	0.0145	25.238
Rossmann-like alpha/beta/alpha sandwich fold	0.603187	Unigene33011_All	"82 528 PREDICTED: isoleucyl-tRNA synthetase, cytoplasmic [Amphimedon queenslandica]"	0.827	Down	0.0246	17.564
EF-hand domain	0.283866	Unigene18712_All	"94 384 Chain A, Solution Structure Of Fly Troponin C, Isoform F1 >gi|29788119|emb|CAD55595.1| troponin C [Lethocerus indicus]"	0.816	Down	0.0153	11.315
EF-hand domain	0.283866	Unigene7612_All	156 722 minus strand Calcium-binding protein p22 [Harpegnathos saltator]	0.712	Down	0.000976	21.993
EF-hand domain	0.283866	Unigene6257_All	"2 205 Chain A, Solution Structure Of The Apo C Terminal Domain Of Lethoceru C Isoform F1"	0.743	Down	0.0226	7.8014
Carboxylesterase, type B	0.000988111	Unigene4654_All	1 1260 minus strand PREDICTED: esterase FE4-like isoform 1 [Acyrthosiphon pisum] >gi|328721620|ref|XP_003247358.1| PREDICTED: esterase FE4-like isoform 2 [Acyrthosiphon pisum] >gi|328721622|ref|XP_003247359.1| PREDICTED: esterase FE4-like isoform 3 [Acyrthosiphon pisum]	0.648	Down	0.0423	46.864
Carboxylesterase, type B	0.000988111	CL1448.Contig2_All	44 1624 minus strand PREDICTED: venom carboxylesterase-6 isoform 1 [Nasonia vitripennis] >gi|345497206|ref|XP_003427935.1| PREDICTED: venom carboxylesterase-6 isoform 2 [Nasonia vitripennis]	0.241	Down	0.000403	59.418
Carboxylesterase, type B	0.000988111	Unigene3621_All	148 1662 PREDICTED: venom carboxylesterase-6 isoform 1 [Nasonia vitripennis] >gi|345497206|ref|XP_003427935.1| PREDICTED: venom carboxylesterase-6 isoform 2 [Nasonia vitripennis]	0.430	Down	0.0163	57.034
Carboxylesterase, type B	0.000988111	Unigene5730_All	70 1629 minus strand PREDICTED: similar to juvenile hormone esterase [Tribolium castaneum]	0.455	Down	0.027	58.895
Carboxylesterase, type B	0.000988111	Unigene3640_All	4 1164 minus strand PREDICTED: venom carboxylesterase-6-like [Apis mellifera]	0.666	Down	0.0206	44.305
Carboxylesterase, type B	0.000988111	Unigene17059_All	65 1606 minus strand PREDICTED: venom carboxylesterase-6 isoform 1 [Nasonia vitripennis] >gi|345497206|ref|XP_003427935.1| PREDICTED: venom carboxylesterase-6 isoform 2 [Nasonia vitripennis]	0.752	Down	0.00137	58.293
Thiolase-like	0.00490457	Unigene23496_All	74 1057 fatty acid synthase [Bombus lucorum]	0.659	Down	0.00313	35.341
Thiolase-like	0.00490457	Unigene20022_All	2 574 minus strand PREDICTED: similar to AGAP006821-PA [Tribolium castaneum]	0.800	Down	0.0155	19.686
Thiolase-like	0.00490457	Unigene15092_All	217 1584 hydroxymethylglutaryl-CoA synthase 1 [Culex quinquefasciatus] >gi|167868813|gb|EDS32196.1| hydroxymethylglutaryl-CoA synthase 1 [Culex quinquefasciatus]	0.707	Down	0.00763	50.213
Thiolase-like	0.00490457	Unigene8345_All	"3 317 PREDICTED: 3-ketoacyl-CoA thiolase, mitochondrial-like [Apis mellifera]"	0.752	Down	0.0244	11.709
HSP20-like chaperone	0.353871	CL5444.Contig2_All	154 690 minus strand small heat shock protein [Trialeurodes vaporariorum]	0.663	Down	0.0238	20.255
HSP20-like chaperone	0.353871	CL1793.Contig1_All	330 818 minus strand heat shock protein 20.7 [Schistocerca gregaria]	0.403	Down	0.00509	18.188
S-adenosyl-L-methionine-dependent methyltransferase	0.203652	Unigene9992_All	63 908 minus strand PREDICTED: spermidine synthase [Apis mellifera]	0.522	Down	0.000212	31.724
S-adenosyl-L-methionine-dependent methyltransferase	0.203652	Unigene10287_All	112 864 juvenile hormone acid methyltransferase [Schistocerca gregaria]	0.645	Down	0.0111	29.032
S-adenosyl-L-methionine-dependent methyltransferase	0.203652	CL408.Contig4_All	40 789 minus strand juvenile hormone acid methyltransferase [Schistocerca gregaria]	0.361	Down	0.0247	29.445
Uncharacterised domain, di-copper centre	4.17733e-08	Unigene12882_All	105 2138 phenoloxidase subunit A3 [Apis mellifera] >gi|41350389|gb|AAO72539.2| prophenoloxidase [Apis mellifera]	0.675	Down	0.00641	78.555
Uncharacterised domain, di-copper centre	4.17733e-08	CL3376.Contig1_All	3 2078 cyanoprotein beta subunit precursor [Riptortus clavatus]	0.185	Down	0.0012	80.277
Uncharacterised domain, di-copper centre	4.17733e-08	Unigene14079_All	2 1435 prophenoloxidase [Tenebrio molitor]	0.679	Down	0.0176	55.465
Uncharacterised domain, di-copper centre	4.17733e-08	Unigene16109_All	52 2097 minus strand pro-phenol oxidase subunit 2 [Tribolium castaneum] >gi|70999576|gb|AAX84205.1| pro-phenol oxidase subunit 2 [Tribolium castaneum]	0.768	Down	0.015	79.041
Uncharacterised domain, di-copper centre	4.17733e-08	Unigene393_All	53 664 PREDICTED: phenoloxidase subunit A3-like [Bombus impatiens]	0.607	Down	0.00876	23.845
Uncharacterised domain, di-copper centre	4.17733e-08	CL3376.Contig2_All	9 2084 cyanoprotein beta subunit precursor [Riptortus clavatus]	0.147	Down	0.00251	80.151
Hemocyanin, N-terminal	1.51517e-06	Unigene12882_All	105 2138 phenoloxidase subunit A3 [Apis mellifera] >gi|41350389|gb|AAO72539.2| prophenoloxidase [Apis mellifera]	0.675	Down	0.00641	78.555
Hemocyanin, N-terminal	1.51517e-06	CL3376.Contig1_All	3 2078 cyanoprotein beta subunit precursor [Riptortus clavatus]	0.185	Down	0.0012	80.277
Hemocyanin, N-terminal	1.51517e-06	Unigene16109_All	52 2097 minus strand pro-phenol oxidase subunit 2 [Tribolium castaneum] >gi|70999576|gb|AAX84205.1| pro-phenol oxidase subunit 2 [Tribolium castaneum]	0.768	Down	0.015	79.041
Hemocyanin, N-terminal	1.51517e-06	Unigene393_All	53 664 PREDICTED: phenoloxidase subunit A3-like [Bombus impatiens]	0.607	Down	0.00876	23.845
Hemocyanin, N-terminal	1.51517e-06	CL3376.Contig2_All	9 2084 cyanoprotein beta subunit precursor [Riptortus clavatus]	0.147	Down	0.00251	80.151
ABC-2 type transporter	0.0923462	Unigene8763_All	251 2038 minus strand PREDICTED: similar to abc transporter [Tribolium castaneum]	0.515	Down	0.00141	67.419
ABC-2 type transporter	0.0923462	Unigene5691_All	214 2238 PREDICTED: ATP-binding cassette sub-family G member 4-like isoform 2 [Acyrthosiphon pisum]	0.636	Down	0.00125	75.268
Alcohol dehydrogenase, C-terminal	0.252454	Unigene5698_All	149 1282 minus strand PREDICTED: alcohol dehydrogenase class-3 [Apis mellifera]	0.778	Down	0.0225	40.6
Alcohol dehydrogenase, C-terminal	0.252454	CL355.Contig1_All	3 3932 PREDICTED: fatty acid synthase-like isoform 1 [Acyrthosiphon pisum]	0.662	Down	0.00132	144.71
NAD(P)-binding domain	0.0046064	CL3986.Contig1_All	1 732 PREDICTED: similar to serine 3-dehydrogenase [Tribolium castaneum]	0.561	Down	0.000204	26.504
NAD(P)-binding domain	0.0046064	Unigene18208_All	"134 1579 minus strand 6-phosphogluconate dehydrogenase, decarboxylating [Acromyrmex echinatior]"	0.790	Down	0.00187	52.8
NAD(P)-binding domain	0.0046064	Unigene3641_All	142 957 GA12171 [Drosophila pseudoobscura pseudoobscura] >gi|54644849|gb|EAL33589.1| GA12171 [Drosophila pseudoobscura pseudoobscura]	0.625	Down	0.0105	30.688
NAD(P)-binding domain	0.0046064	Unigene2273_All	"147 1178 minus strand PREDICTED: glycerol-3-phosphate dehydrogenase [NAD+], cytoplasmic-like [Bombus impatiens]"	0.498	Down	0.00046	37.841
NAD(P)-binding domain	0.0046064	CL217.Contig1_All	166 1077 AGAP012261-PA [Anopheles gambiae str. PEST] >gi|55234400|gb|EAA00282.3| AGAP012261-PA [Anopheles gambiae str. PEST]	0.824	Down	0.0427	34.022
NAD(P)-binding domain	0.0046064	Unigene7763_All	113 1108 Gapdh2 [Drosophila pseudoobscura pseudoobscura] >gi|115312169|sp|O44104.2|G3P2_DROPS RecName: Full=Glyceraldehyde-3-phosphate dehydrogenase 2; AltName: Full=Glyceraldehyde-3-phosphate dehydrogenase II; Short=GAPDH II >gi|54640108|gb|EAL29271.1| Gapdh2 [Drosophila pseudoobscura pseudoobscura]	0.731	Down	0.00297	35.654
NAD(P)-binding domain	0.0046064	Unigene8728_All	188 1714 GD25529 [Drosophila simulans] >gi|194193807|gb|EDX07383.1| GD25529 [Drosophila simulans]	0.739	Down	0.000877	56.923
NAD(P)-binding domain	0.0046064	Unigene20298_All	114 842 L-xylulose reductase [Anoplopoma fimbria]	0.831	Down	0.0132	26.234
NAD(P)-binding domain	0.0046064	Unigene5698_All	149 1282 minus strand PREDICTED: alcohol dehydrogenase class-3 [Apis mellifera]	0.778	Down	0.0225	40.6
NAD(P)-binding domain	0.0046064	CL355.Contig1_All	3 3932 PREDICTED: fatty acid synthase-like isoform 1 [Acyrthosiphon pisum]	0.662	Down	0.00132	144.71
EF-hand domain pair	0.380794	Unigene18712_All	"94 384 Chain A, Solution Structure Of Fly Troponin C, Isoform F1 >gi|29788119|emb|CAD55595.1| troponin C [Lethocerus indicus]"	0.816	Down	0.0153	11.315
EF-hand domain pair	0.380794	Unigene7612_All	156 722 minus strand Calcium-binding protein p22 [Harpegnathos saltator]	0.712	Down	0.000976	21.993
EF-hand domain pair	0.380794	Unigene6257_All	"2 205 Chain A, Solution Structure Of The Apo C Terminal Domain Of Lethoceru C Isoform F1"	0.743	Down	0.0226	7.8014
