# Supplementary material for: Differential Proteomics Analysis Unraveled Mechanisms of Arma chinensis Responding to Improved Artificial Diet
Source: Insects. 2022 Jul 2;13(7):605. doi: 10.3390/insects13070605 (PMC9319121; doi:10.3390/insects13070605)
Supplement: Supplementary file 1 [file insects-13-00605-s001.zip › Supplementary Table S16.xlsx]

## Sheet: Up Domain2Protein
Table S16. Protein domain enrichment analysis for the up-regulated DEPs in IADN/COSMN.
Domain Description	Fisher's exact test p value	Protein accession	Protein description	IADN/COSMN Ratio	Regulated Type	IADN/COSMN P value	MW [kDa]
Zinc finger, LIM-type	0.709554	Unigene11962_All	62 1090 minus strand AGAP005400-PA [Anopheles gambiae str. PEST] >gi|157015419|gb|EAA10887.3| AGAP005400-PA [Anopheles gambiae str. PEST]	1.211	Up	0.012	39.324
Zinc finger, LIM-type	0.709554	Unigene16633_All	29 397 PREDICTED: muscle LIM protein Mlp84B-like [Bombus impatiens]	1.416	Up	0.0466	13.006
Serum albumin, N-terminal	0.168947	Unigene32074_All	3 674 minus strand albumin [Sus scrofa domesticus]	3.836	Up	0.00635	25.238
Serum albumin, N-terminal	0.168947	Unigene28901_All	2 229 minus strand albumin [Sus scrofa]	5.731	Up	0.0312	8.5354
Lipid transport protein, N-terminal	0.578861	Unigene18963_All	39 1007 minus strand vitellogenin [Trigonotylus caelestialium]	1.244	Up	0.00603	37.493
Lipid transport protein, N-terminal	0.578861	Unigene4622_All	133 2895 minus strand PREDICTED: vitellogenin-6-like [Acyrthosiphon pisum]	1.204	Up	0.00966	105.01
Nucleotide-diphospho-sugar transferases	0.67124	Unigene15055_All	86 1510 minus strand glycogenin [Culex quinquefasciatus] >gi|167876468|gb|EDS39851.1| glycogenin [Culex quinquefasciatus]	1.221	Up	0.00445	51.255
Nucleotide-diphospho-sugar transferases	0.67124	CL3759.Contig2_All	186 1679 UDP-glucose pyrophosphorylase [Spodoptera exigua]	1.352	Up	0.011	56.345
Aldehyde oxidase/xanthine dehydrogenase, molybdopterin binding	0.168947	Unigene8465_All	23 1945 minus strand PREDICTED: aldehyde oxidase-like [Bombus terrestris]	2.113	Up	0.00602	71.07
Aldehyde oxidase/xanthine dehydrogenase, molybdopterin binding	0.168947	Unigene14646_All	35 4117 minus strand PREDICTED: xanthine dehydrogenase-like [Bombus terrestris]	1.201	Up	0.00947	150.96
Vitellinogen, open beta-sheet	0.0971274	Unigene10798_All	1 2433 vitellogenin [Lethocerus deyrollei]	1.291	Up	0.0282	93.247
Vitellinogen, open beta-sheet	0.0971274	Unigene18963_All	39 1007 minus strand vitellogenin [Trigonotylus caelestialium]	1.244	Up	0.00603	37.493
Vitellinogen, open beta-sheet	0.0971274	Unigene4622_All	133 2895 minus strand PREDICTED: vitellogenin-6-like [Acyrthosiphon pisum]	1.204	Up	0.00966	105.01
SMP-30/Gluconolactonase/LRE-like region	0.168947	Unigene3651_All	94 1023 PREDICTED: similar to luciferin-regenerating enzyme [Tribolium castaneum]	1.617	Up	0.0214	34.013
SMP-30/Gluconolactonase/LRE-like region	0.168947	Unigene7920_All	142 1080 minus strand PREDICTED: regucalcin-like isoform 1 [Nasonia vitripennis] >gi|345478834|ref|XP_003423819.1| PREDICTED: regucalcin-like isoform 2 [Nasonia vitripennis]	1.411	Up	0.0084	34.446
Lipid transport protein, beta-sheet shell	0.18035	Unigene10798_All	1 2433 vitellogenin [Lethocerus deyrollei]	1.291	Up	0.0282	93.247
Lipid transport protein, beta-sheet shell	0.18035	Unigene18963_All	39 1007 minus strand vitellogenin [Trigonotylus caelestialium]	1.244	Up	0.00603	37.493
Lipid transport protein, beta-sheet shell	0.18035	Unigene4622_All	133 2895 minus strand PREDICTED: vitellogenin-6-like [Acyrthosiphon pisum]	1.204	Up	0.00966	105.01
Ankyrin repeat-containing domain	0.0447169	CL2012.Contig2_All	"1 630 minus strand PREDICTED: similar to ankyrin 2,3/unc44 [Strongylocentrotus purpuratus] >gi|115931843|ref|XP_001181229.1| PREDICTED: similar to ankyrin 2,3/unc44 [Strongylocentrotus purpuratus]"	1.869	Up	0.0139	22.789
Ankyrin repeat-containing domain	0.0447169	CL2311.Contig2_All	"7 678 minus strand ankyrin 2,3/unc44 [Aedes aegypti] >gi|108868779|gb|EAT33004.1| ankyrin 2,3/unc44 [Aedes aegypti]"	1.899	Up	0.0389	24.558
Ankyrin repeat-containing domain	0.0447169	Unigene21097_All	"10 201 minus strand PREDICTED: similar to ankyrin 2,3/unc44 [Strongylocentrotus purpuratus] >gi|115939176|ref|XP_001196964.1| PREDICTED: similar to ankyrin 2,3/unc44 [Strongylocentrotus purpuratus]"	1.592	Up	0.00918	7.181
Ankyrin repeat-containing domain	0.0447169	Unigene2150_All	"628 2532 ankyrin 2,3/unc44 [Aedes aegypti] >gi|108868849|gb|EAT33074.1| ankyrin 2,3/unc44 [Aedes aegypti]"	1.553	Up	0.00579	67.906
Ankyrin repeat-containing domain	0.0447169	Unigene16145_All	"37 3531 PREDICTED: similar to ankyrin 2,3/unc44 [Strongylocentrotus purpuratus] >gi|115929638|ref|XP_001182096.1| PREDICTED: similar to ankyrin 2,3/unc44 [Strongylocentrotus purpuratus]"	1.433	Up	0.00165	125.86
Ankyrin repeat-containing domain	0.0447169	Unigene13359_All	"2 280 minus strand PREDICTED: similar to ankyrin 2,3/unc44 [Strongylocentrotus purpuratus] >gi|115934471|ref|XP_001190676.1| PREDICTED: similar to ankyrin 2,3/unc44 [Strongylocentrotus purpuratus]"	2.001	Up	0.00375	10.335
Ankyrin repeat-containing domain	0.0447169	Unigene3234_All	"240 899 PREDICTED: similar to ankyrin 2,3/unc44, partial [Strongylocentrotus purpuratus] >gi|115970262|ref|XP_001190373.1| PREDICTED: similar to ankyrin 2,3/unc44, partial [Strongylocentrotus purpuratus]"	1.462	Up	0.0117	24.376
Ankyrin repeat-containing domain	0.0447169	Unigene19229_All	"3 1295 minus strand ankyrin 2,3/unc44 [Aedes aegypti] >gi|108868779|gb|EAT33004.1| ankyrin 2,3/unc44 [Aedes aegypti]"	1.453	Up	0.00799	47.857
Ankyrin repeat-containing domain	0.0447169	Unigene10830_All	"738 2945 minus strand ankyrin 2,3/unc44 [Aedes aegypti] >gi|108868779|gb|EAT33004.1| ankyrin 2,3/unc44 [Aedes aegypti]"	1.408	Up	0.0127	81.012
Alpha-helical ferredoxin	0.168947	Unigene10512_All	2 3025 minus strand Putative glutamate synthase [NADPH] [Harpegnathos saltator]	1.472	Up	0.000853	109.7
Alpha-helical ferredoxin	0.168947	CL595.Contig1_All	22 3018 minus strand PREDICTED: dihydropyrimidine dehydrogenase [NADP+]-like isoform 1 [Apis mellifera]	1.395	Up	0.00185	109.55
CHK kinase-like	0.486534	CL352.Contig1_All	140 1330 minus strand GG11391 [Drosophila erecta] >gi|190656463|gb|EDV53695.1| GG11391 [Drosophila erecta]	1.358	Up	0.00433	46.893
CHK kinase-like	0.486534	Unigene14141_All	17 1096 GK13030 [Drosophila willistoni] >gi|194169717|gb|EDW84618.1| GK13030 [Drosophila willistoni]	1.593	Up	0.00774	42.135
CHK kinase-like	0.486534	CL3296.Contig3_All	130 1245 GE10718 [Drosophila yakuba] >gi|194185169|gb|EDW98780.1| GE10718 [Drosophila yakuba]	1.209	Up	0.0397	42.458
Glycoside hydrolase superfamily	0.37818	Unigene311_All	133 2205 minus strand PREDICTED: similar to GA17312-PA [Tribolium castaneum]	1.356	Up	0.0137	79.675
Glycoside hydrolase superfamily	0.37818	CL146.Contig2_All	176 2119 minus strand PREDICTED: beta-glucuronidase-like [Acyrthosiphon pisum]	1.631	Up	0.0248	74.201
Glycoside hydrolase superfamily	0.37818	Unigene10842_All	435 3059 minus strand PREDICTED: similar to acid alpha-glucosidase [Tribolium castaneum]	1.543	Up	0.00198	98.189
Glycoside hydrolase superfamily	0.37818	Unigene20261_All	354 1904 PREDICTED: uncharacterized family 31 glucosidase KIAA1161-like [Nasonia vitripennis]	2.594	Up	0.000612	59.033
Glycoside hydrolase superfamily	0.37818	Unigene18202_All	160 1980 minus strand PREDICTED: beta-galactosidase-like [Acyrthosiphon pisum]	1.951	Up	1.82e-05	68.82
Aldehyde dehydrogenase, C-terminal	0.523395	CL1926.Contig1_All	280 2487 PREDICTED: delta-1-pyrroline-5-carboxylate synthase-like [Nasonia vitripennis]	1.272	Up	0.00939	79.601
Aldehyde dehydrogenase, C-terminal	0.523395	Unigene33048_All	"2 592 minus strand PREDICTED: succinate-semialdehyde dehydrogenase, mitochondrial-like isoform 1 [Acyrthosiphon pisum]"	1.223	Up	0.0185	21.547
6-phosphogluconate dehydrogenase C-terminal domain-like	0.18035	Unigene7149_All	45 1463 minus strand PREDICTED: UDP-glucose 6-dehydrogenase-like [Bombus terrestris] >gi|350400065|ref|XP_003485726.1| PREDICTED: UDP-glucose 6-dehydrogenase-like [Bombus impatiens]	1.321	Up	0.0228	52.614
6-phosphogluconate dehydrogenase C-terminal domain-like	0.18035	Unigene1610_All	96 899 PREDICTED: similar to GA19292-PA [Tribolium castaneum]	1.232	Up	0.0367	28.416
6-phosphogluconate dehydrogenase C-terminal domain-like	0.18035	Unigene1445_All	78 878 minus strand PREDICTED: similar to pyrroline-5-carboxylate reductase [Tribolium castaneum]	1.625	Up	0.0121	28.223
Cathepsin propeptide inhibitor domain (I29)	0.00250946	CL1335.Contig2_All	123 1127 GH22826 [Drosophila grimshawi] >gi|193899288|gb|EDV98154.1| GH22826 [Drosophila grimshawi]	1.747	Up	0.0449	37.454
Cathepsin propeptide inhibitor domain (I29)	0.00250946	Unigene10829_All	"51 1607 26,29 kDa proteinase-like cysteine protease [Plautia stali]"	1.553	Up	0.00411	58.6
Cathepsin propeptide inhibitor domain (I29)	0.00250946	CL272.Contig6_All	32 1012 minus strand cathepsin L-like proteinase [Triatoma brasiliensis]	1.338	Up	0.0249	35.999
Cathepsin propeptide inhibitor domain (I29)	0.00250946	Unigene16075_All	173 1174 minus strand cathepsin L-like cysteine protease 2 [Plautia stali]	1.483	Up	0.00615	37.586
Cathepsin propeptide inhibitor domain (I29)	0.00250946	CL5255.Contig2_All	70 1101 cathepsin L-like cysteine protease 1 [Plautia stali]	1.767	Up	0.00761	38.57
Cathepsin propeptide inhibitor domain (I29)	0.00250946	CL4079.Contig2_All	1 1044 PREDICTED: cathepsin O-like [Apis mellifera]	1.214	Up	0.0104	39.632
HotDog domain	0.26546	Unigene1268_All	66 623 minus strand mesenchymal stem cell protein DSCD75 [Danaus plexippus]	1.250	Up	0.0285	22.166
HotDog domain	0.26546	Unigene8543_All	100 2229 PREDICTED: peroxisomal multifunctional enzyme type 2-like isoform 2 [Acyrthosiphon pisum] >gi|328711510|ref|XP_003244559.1| PREDICTED: peroxisomal multifunctional enzyme type 2-like isoform 3 [Acyrthosiphon pisum]	1.254	Up	0.00173	77.229
Superoxide dismutase, copper/zinc binding domain	0.309445	Unigene14958_All	206 616 Cu/Zn superoxide dismutase [Cavia porcellus]	1.870	Up	0.024	14.147
Superoxide dismutase, copper/zinc binding domain	0.309445	Unigene11805_All	217 678 superoxide dismutase [Triatoma infestans]	1.311	Up	0.0318	15.832
Dihydroprymidine dehydrogenase domain II	0.116054	Unigene10512_All	2 3025 minus strand Putative glutamate synthase [NADPH] [Harpegnathos saltator]	1.472	Up	0.000853	109.7
Dihydroprymidine dehydrogenase domain II	0.116054	CL595.Contig1_All	22 3018 minus strand PREDICTED: dihydropyrimidine dehydrogenase [NADP+]-like isoform 1 [Apis mellifera]	1.395	Up	0.00185	109.55
AMP-dependent synthetase/ligase	0.466558	CL4464.Contig1_All	128 1792 PREDICTED: probable 4-coumarate--CoA ligase 3-like isoform 2 [Acyrthosiphon pisum] >gi|328708060|ref|XP_001948363.2| PREDICTED: probable 4-coumarate--CoA ligase 3-like isoform 1 [Acyrthosiphon pisum]	1.481	Up	0.00848	61.846
AMP-dependent synthetase/ligase	0.466558	Unigene14866_All	62 784 PREDICTED: long-chain-fatty-acid--CoA ligase 1-like [Apis mellifera]	1.280	Up	0.0149	26.934
AMP-dependent synthetase/ligase	0.466558	CL3245.Contig1_All	109 1668 minus strand AMP dependent coa ligase [Aedes aegypti] >gi|108884645|gb|EAT48870.1| AMP dependent coa ligase [Aedes aegypti]	1.204	Up	0.0408	57.952
Serpin domain	0.578861	CL2900.Contig2_All	2 358 minus strand PREDICTED: serpin A3-8 [Sus scrofa]	3.865	Up	0.00531	13.225
Serpin domain	0.578861	Unigene21110_All	2 103 minus strand PREDICTED: serpin A3-6 [Sus scrofa]	11.771	Up	0.0216	3.8605
Laminin EGF domain	0.0386763	CL1573.Contig2_All	2 2170 PREDICTED: attractin-like protein 1-like [Acyrthosiphon pisum]	1.220	Up	0.0143	80.089
Laminin EGF domain	0.0386763	Unigene28617_All	2 415 minus strand Basement membrane-specific heparan sulfate proteoglycan core protein [Harpegnathos saltator]	1.488	Up	0.00433	15.105
Laminin EGF domain	0.0386763	Unigene26125_All	1 195 Basement membrane-specific heparan sulfate proteoglycan core protein [Acromyrmex echinatior]	1.407	Up	0.00217	7.0489
Laminin EGF domain	0.0386763	Unigene31056_All	3 248 minus strand PREDICTED: similar to AGAP003656-PA [Tribolium castaneum]	1.209	Up	0.0137	8.954
Ferritin/DPS protein domain	0.019727	Unigene17997_All	92 793 minus strand ferritin subunit (glycosylated) [Nilaparvata lugens]	1.635	Up	0.00124	26.496
Ferritin/DPS protein domain	0.019727	Unigene9695_All	373 897 minus strand PREDICTED: ferritin subunit-like [Bombus impatiens]	1.563	Up	0.0154	20.212
Ferritin/DPS protein domain	0.019727	Unigene1596_All	185 700 ferritin [Triatoma infestans]	3.397	Up	0.000992	19.469
Metal-dependent hydrolase	0.551983	Unigene12066_All	38 1063 minus strand phosphotriesterase-like protein [Lygus lineolaris]	1.315	Up	0.0147	38.078
Metal-dependent hydrolase	0.551983	Unigene5813_All	2 961 minus strand AMP deaminase 2 [Acromyrmex echinatior]	1.202	Up	0.0242	37.161
Peptidase C1A, papain C-terminal	0.000209066	Unigene16075_All	173 1174 minus strand cathepsin L-like cysteine protease 2 [Plautia stali]	1.483	Up	0.00615	37.586
Peptidase C1A, papain C-terminal	0.000209066	CL5255.Contig2_All	70 1101 cathepsin L-like cysteine protease 1 [Plautia stali]	1.767	Up	0.00761	38.57
Peptidase C1A, papain C-terminal	0.000209066	Unigene18171_All	96 1094 minus strand cathepsin b [Aedes aegypti] >gi|54289254|gb|AAV31917.1| lysosomal cathepsin B [Aedes aegypti] >gi|108874249|gb|EAT38474.1| cathepsin b [Aedes aegypti]	1.693	Up	0.00769	36.55
Peptidase C1A, papain C-terminal	0.000209066	CL1335.Contig2_All	123 1127 GH22826 [Drosophila grimshawi] >gi|193899288|gb|EDV98154.1| GH22826 [Drosophila grimshawi]	1.747	Up	0.0449	37.454
Peptidase C1A, papain C-terminal	0.000209066	Unigene10829_All	"51 1607 26,29 kDa proteinase-like cysteine protease [Plautia stali]"	1.553	Up	0.00411	58.6
Peptidase C1A, papain C-terminal	0.000209066	Unigene12443_All	1 396 minus strand PREDICTED: cathepsin L-like [Oreochromis niloticus]	2.735	Up	0.00231	14.238
Peptidase C1A, papain C-terminal	0.000209066	CL272.Contig6_All	32 1012 minus strand cathepsin L-like proteinase [Triatoma brasiliensis]	1.338	Up	0.0249	35.999
Peptidase C1A, papain C-terminal	0.000209066	CL4079.Contig2_All	1 1044 PREDICTED: cathepsin O-like [Apis mellifera]	1.214	Up	0.0104	39.632
Peptidase C1A, papain C-terminal	0.000209066	Unigene1580_All	90 1082 minus strand cathepsin B [Branchiostoma belcheri tsingtauense]	2.446	Up	0.00759	35.94
Glutathione S-transferase, N-terminal	0.0196449	Unigene1270_All	1 462 glutathione S-transferase sigma 3 [Locusta migratoria]	1.448	Up	0.0296	17.16
Glutathione S-transferase, N-terminal	0.0196449	Unigene1571_All	97 981 minus strand ganglioside-induced differentiation-associated-protein [Bombyx mori] >gi|315177973|gb|ADT82940.1| ganglioside-induced differentiation-associated-protein [Bombyx mori]	1.202	Up	0.0077	33.889
Glutathione S-transferase, N-terminal	0.0196449	CL2199.Contig1_All	107 751 minus strand AGAP002898-PC [Anopheles gambiae str. PEST] >gi|347968788|ref|XP_003436291.1| AGAP002898-PD [Anopheles gambiae str. PEST] >gi|333467833|gb|EGK96714.1| AGAP002898-PC [Anopheles gambiae str. PEST] >gi|333467834|gb|EGK96715.1| AGAP002898-PD [Anopheles gambiae str. PEST]	1.398	Up	0.0322	24.81
Glutathione S-transferase, N-terminal	0.0196449	Unigene6996_All	81 242 minus strand glutathione S-transferase S2 [Laodelphax striatellus]	1.530	Up	0.0353	6.5176
Glutathione S-transferase, N-terminal	0.0196449	Unigene18246_All	161 760 glutathione S-transferase-like [Acyrthosiphon pisum] >gi|239790948|dbj|BAH72002.1| ACYPI002679 [Acyrthosiphon pisum]	1.553	Up	0.0179	24.096
Pyrroline-5-carboxylate reductase, catalytic, N-terminal	0.116054	Unigene1610_All	96 899 PREDICTED: similar to GA19292-PA [Tribolium castaneum]	1.232	Up	0.0367	28.416
Pyrroline-5-carboxylate reductase, catalytic, N-terminal	0.116054	Unigene1445_All	78 878 minus strand PREDICTED: similar to pyrroline-5-carboxylate reductase [Tribolium castaneum]	1.625	Up	0.0121	28.223
NAD(P)-binding domain	0.0583415	Unigene4604_All	30 1343 PREDICTED: fatty acid synthase-like [Acyrthosiphon pisum]	1.388	Up	0.0288	48.523
NAD(P)-binding domain	0.0583415	Unigene10512_All	2 3025 minus strand Putative glutamate synthase [NADPH] [Harpegnathos saltator]	1.472	Up	0.000853	109.7
NAD(P)-binding domain	0.0583415	Unigene1610_All	96 899 PREDICTED: similar to GA19292-PA [Tribolium castaneum]	1.232	Up	0.0367	28.416
NAD(P)-binding domain	0.0583415	CL880.Contig3_All	1 816 PREDICTED: adenosylhomocysteinase-like isoform 2 [Bombus terrestris]	1.295	Up	0.00216	30.267
NAD(P)-binding domain	0.0583415	Unigene17035_All	5 2059 PREDICTED: fatty acid synthase-like [Acyrthosiphon pisum]	1.324	Up	0.0498	76.457
NAD(P)-binding domain	0.0583415	CL3383.Contig3_All	152 1546 minus strand PREDICTED: peroxisomal N(1)-acetyl-spermine/spermidine oxidase-like [Bombus terrestris]	1.281	Up	0.00732	52.216
NAD(P)-binding domain	0.0583415	Unigene9975_All	57 1100 minus strand sorbitol dehydrogenase [Pyrrhocoris apterus]	1.344	Up	0.000184	37.608
NAD(P)-binding domain	0.0583415	Unigene18222_All	62 829 minus strand PREDICTED: 15-hydroxyprostaglandin dehydrogenase [NAD+]-like [Bombus impatiens]	1.313	Up	0.00417	27.217
NAD(P)-binding domain	0.0583415	Unigene7149_All	45 1463 minus strand PREDICTED: UDP-glucose 6-dehydrogenase-like [Bombus terrestris] >gi|350400065|ref|XP_003485726.1| PREDICTED: UDP-glucose 6-dehydrogenase-like [Bombus impatiens]	1.321	Up	0.0228	52.614
NAD(P)-binding domain	0.0583415	CL880.Contig1_All	190 1272 minus strand PREDICTED: adenosylhomocysteinase A-like [Anolis carolinensis]	1.216	Up	0.0144	39.899
NAD(P)-binding domain	0.0583415	Unigene1445_All	78 878 minus strand PREDICTED: similar to pyrroline-5-carboxylate reductase [Tribolium castaneum]	1.625	Up	0.0121	28.223
NAD(P)-binding domain	0.0583415	Unigene8543_All	100 2229 PREDICTED: peroxisomal multifunctional enzyme type 2-like isoform 2 [Acyrthosiphon pisum] >gi|328711510|ref|XP_003244559.1| PREDICTED: peroxisomal multifunctional enzyme type 2-like isoform 3 [Acyrthosiphon pisum]	1.254	Up	0.00173	77.229
NAD(P)-binding domain	0.0583415	Unigene34324_All	46 1053 minus strand PREDICTED: prostaglandin reductase 1-like [Nasonia vitripennis]	1.206	Up	0.0071	36.702
NAD(P)-binding domain	0.0583415	Unigene16082_All	62 1063 minus strand PREDICTED: prostaglandin reductase 1-like [Nasonia vitripennis]	1.499	Up	0.0269	36.296
Serine proteases, trypsin domain	0.000158264	CL1077.Contig1_All	"1089 2804 minus strand Transmembrane protease, serine 9 [Harpegnathos saltator]"	1.244	Up	0.015	61.858
Serine proteases, trypsin domain	0.000158264	Unigene13889_All	1 714 minus strand trypsin-like protease [Ranatra unicolor]	1.340	Up	0.00921	26.457
Serine proteases, trypsin domain	0.000158264	CL515.Contig1_All	5 706 minus strand trypsin precursor LlSgP3 [Lygus lineolaris]	1.389	Up	0.0189	25.644
Serine proteases, trypsin domain	0.000158264	Unigene18257_All	90 848 minus strand trypsin-like protease [Ranatra unicolor]	1.579	Up	0.00106	28.034
Serine proteases, trypsin domain	0.000158264	Unigene18412_All	2 424 Serine proteinase stubble [Camponotus floridanus]	1.378	Up	0.0284	15.632
Serine proteases, trypsin domain	0.000158264	Unigene3411_All	2 721 minus strand trypsin precursor LlSgP4 [Lygus lineolaris]	1.404	Up	0.000218	26.811
Serine proteases, trypsin domain	0.000158264	Unigene4120_All	4 351 salivary trypsin [Triatoma infestans]	1.314	Up	0.0456	12.709
Serine proteases, trypsin domain	0.000158264	Unigene5660_All	58 1467 minus strand PREDICTED: similar to trypsin-like serine protease [Tribolium castaneum]	1.546	Up	0.0195	51.273
Serine proteases, trypsin domain	0.000158264	CL3794.Contig2_All	76 906 trypsin precursor LlGtP1 [Lygus lineolaris]	1.540	Up	0.0022	30.773
Serine proteases, trypsin domain	0.000158264	Unigene1577_All	53 862 minus strand trypsin precursor LlSgP3 [Lygus lineolaris]	1.553	Up	0.00322	29.989
Serine proteases, trypsin domain	0.000158264	Unigene3337_All	19 894 gluten hydrolyzing proteinase [Eurygaster integriceps]	2.590	Up	0.015	31.512
Serine proteases, trypsin domain	0.000158264	Unigene20396_All	2 721 trypsin precursor LlSgP4 [Lygus lineolaris]	1.445	Up	0.0342	26.721
Serine proteases, trypsin domain	0.000158264	Unigene11900_All	2 547 serine protease [Laccotrephes japonensis]	1.229	Up	0.0172	19.828
Serine proteases, trypsin domain	0.000158264	CL184.Contig3_All	103 984 minus strand secreted salivary trypsin [Triatoma matogrossensis]	2.170	Up	0.00485	32.214
Serine proteases, trypsin domain	0.000158264	Unigene8582_All	20 1189 PREDICTED: serine protease snake-like [Bombus impatiens]	1.856	Up	0.0406	42.675
Serine proteases, trypsin domain	0.000158264	Unigene2476_All	9 2690 minus strand Neurotrypsin [Camponotus floridanus]	1.318	Up	0.000327	98.5
Glutathione S-transferase, C-terminal	0.0887162	Unigene1270_All	1 462 glutathione S-transferase sigma 3 [Locusta migratoria]	1.448	Up	0.0296	17.16
Glutathione S-transferase, C-terminal	0.0887162	Unigene1571_All	97 981 minus strand ganglioside-induced differentiation-associated-protein [Bombyx mori] >gi|315177973|gb|ADT82940.1| ganglioside-induced differentiation-associated-protein [Bombyx mori]	1.202	Up	0.0077	33.889
Glutathione S-transferase, C-terminal	0.0887162	CL2199.Contig1_All	107 751 minus strand AGAP002898-PC [Anopheles gambiae str. PEST] >gi|347968788|ref|XP_003436291.1| AGAP002898-PD [Anopheles gambiae str. PEST] >gi|333467833|gb|EGK96714.1| AGAP002898-PC [Anopheles gambiae str. PEST] >gi|333467834|gb|EGK96715.1| AGAP002898-PD [Anopheles gambiae str. PEST]	1.398	Up	0.0322	24.81
Glutathione S-transferase, C-terminal	0.0887162	Unigene18246_All	161 760 glutathione S-transferase-like [Acyrthosiphon pisum] >gi|239790948|dbj|BAH72002.1| ACYPI002679 [Acyrthosiphon pisum]	1.553	Up	0.0179	24.096
Aldehyde/histidinol dehydrogenase	0.578861	CL1926.Contig1_All	280 2487 PREDICTED: delta-1-pyrroline-5-carboxylate synthase-like [Nasonia vitripennis]	1.272	Up	0.00939	79.601
Aldehyde/histidinol dehydrogenase	0.578861	Unigene33048_All	"2 592 minus strand PREDICTED: succinate-semialdehyde dehydrogenase, mitochondrial-like isoform 1 [Acyrthosiphon pisum]"	1.223	Up	0.0185	21.547
FAD/NAD(P)-binding domain	0.336491	Unigene10512_All	2 3025 minus strand Putative glutamate synthase [NADPH] [Harpegnathos saltator]	1.472	Up	0.000853	109.7
FAD/NAD(P)-binding domain	0.336491	Unigene131_All	211 1482 Uncharacterized aarF domain-containing protein kinase 1 [Camponotus floridanus]	1.292	Up	0.0228	47.001
FAD/NAD(P)-binding domain	0.336491	CL595.Contig1_All	22 3018 minus strand PREDICTED: dihydropyrimidine dehydrogenase [NADP+]-like isoform 1 [Apis mellifera]	1.395	Up	0.00185	109.55
FAD/NAD(P)-binding domain	0.336491	CL3383.Contig3_All	152 1546 minus strand PREDICTED: peroxisomal N(1)-acetyl-spermine/spermidine oxidase-like [Bombus terrestris]	1.281	Up	0.00732	52.216
FAD/NAD(P)-binding domain	0.336491	Unigene3691_All	37 1200 minus strand dimethylaniline monooxygenase 5 [Culex quinquefasciatus] >gi|167875553|gb|EDS38936.1| dimethylaniline monooxygenase 5 [Culex quinquefasciatus]	1.223	Up	0.02	45.292
Immunoglobulin E-set	0.596084	Unigene311_All	133 2205 minus strand PREDICTED: similar to GA17312-PA [Tribolium castaneum]	1.356	Up	0.0137	79.675
Immunoglobulin E-set	0.596084	CL914.Contig1_All	4 3567 minus strand PREDICTED: extracellular domains-containing protein CG31004-like [Nasonia vitripennis]	1.264	Up	0.00383	136.02
Immunoglobulin E-set	0.596084	Unigene12032_All	67 513 GD23124 [Drosophila simulans] >gi|194189815|gb|EDX03391.1| GD23124 [Drosophila simulans]	1.271	Up	0.000593	16.679
S-adenosyl-L-homocysteine hydrolase, NAD binding domain	0.26546	CL880.Contig3_All	1 816 PREDICTED: adenosylhomocysteinase-like isoform 2 [Bombus terrestris]	1.295	Up	0.00216	30.267
S-adenosyl-L-homocysteine hydrolase, NAD binding domain	0.26546	CL880.Contig1_All	190 1272 minus strand PREDICTED: adenosylhomocysteinase A-like [Anolis carolinensis]	1.216	Up	0.0144	39.899
Band 7 domain	0.350805	Unigene14126_All	19 1284 minus strand AGAP007494-PA [Anopheles gambiae str. PEST] >gi|157020060|gb|EAA04642.4| AGAP007494-PA [Anopheles gambiae str. PEST]	1.245	Up	0.0201	46.805
Band 7 domain	0.350805	Unigene2359_All	216 998 minus strand GK25171 [Drosophila willistoni] >gi|194167451|gb|EDW82352.1| GK25171 [Drosophila willistoni]	1.300	Up	0.00257	28.961
Epoxide hydrolase, N-terminal	0.116054	Unigene6419_All	65 1402 minus strand PREDICTED: similar to juvenile hormone epoxide hydrolase [Tribolium castaneum]	1.416	Up	0.0301	51.222
Epoxide hydrolase, N-terminal	0.116054	Unigene3633_All	396 1748 PREDICTED: similar to juvenile hormone epoxide hydrolase [Tribolium castaneum]	1.368	Up	0.0184	51.695
Vitellinogen, superhelical	0.460657	Unigene18963_All	39 1007 minus strand vitellogenin [Trigonotylus caelestialium]	1.244	Up	0.00603	37.493
Vitellinogen, superhelical	0.460657	Unigene4622_All	133 2895 minus strand PREDICTED: vitellogenin-6-like [Acyrthosiphon pisum]	1.204	Up	0.00966	105.01
Peptidase C1A, propeptide	0.168947	Unigene1580_All	90 1082 minus strand cathepsin B [Branchiostoma belcheri tsingtauense]	2.446	Up	0.00759	35.94
Peptidase C1A, propeptide	0.168947	Unigene18171_All	96 1094 minus strand cathepsin b [Aedes aegypti] >gi|54289254|gb|AAV31917.1| lysosomal cathepsin B [Aedes aegypti] >gi|108874249|gb|EAT38474.1| cathepsin b [Aedes aegypti]	1.693	Up	0.00769	36.55
Aldehyde oxidase/xanthine dehydrogenase, a/b hammerhead	0.0102678	Unigene8465_All	23 1945 minus strand PREDICTED: aldehyde oxidase-like [Bombus terrestris]	2.113	Up	0.00602	71.07
Aldehyde oxidase/xanthine dehydrogenase, a/b hammerhead	0.0102678	Unigene14646_All	35 4117 minus strand PREDICTED: xanthine dehydrogenase-like [Bombus terrestris]	1.201	Up	0.00947	150.96
Aldehyde oxidase/xanthine dehydrogenase, a/b hammerhead	0.0102678	Unigene28262_All	4 789 minus strand Xanthine dehydrogenase/oxidase [Harpegnathos saltator]	1.713	Up	0.0289	29.176
Six-bladed beta-propeller, TolB-like	0.579097	Unigene3651_All	94 1023 PREDICTED: similar to luciferin-regenerating enzyme [Tribolium castaneum]	1.617	Up	0.0214	34.013
Six-bladed beta-propeller, TolB-like	0.579097	Unigene7920_All	142 1080 minus strand PREDICTED: regucalcin-like isoform 1 [Nasonia vitripennis] >gi|345478834|ref|XP_003423819.1| PREDICTED: regucalcin-like isoform 2 [Nasonia vitripennis]	1.411	Up	0.0084	34.446
Six-bladed beta-propeller, TolB-like	0.579097	Unigene3568_All	153 1277 minus strand PREDICTED: adipocyte plasma membrane-associated protein-like [Nasonia vitripennis]	1.214	Up	0.0101	41.986
SCP2 sterol-binding domain	0.309445	Unigene9653_All	154 534 PREDICTED: non-specific lipid-transfer protein-like [Acyrthosiphon pisum]	1.245	Up	0.0249	13.812
SCP2 sterol-binding domain	0.309445	Unigene8543_All	100 2229 PREDICTED: peroxisomal multifunctional enzyme type 2-like isoform 2 [Acyrthosiphon pisum] >gi|328711510|ref|XP_003244559.1| PREDICTED: peroxisomal multifunctional enzyme type 2-like isoform 3 [Acyrthosiphon pisum]	1.254	Up	0.00173	77.229
Alpha/Beta hydrolase fold	2.98858e-06	Unigene1485_All	67 1440 PREDICTED: lysosomal Pro-X carboxypeptidase-like [Acyrthosiphon pisum]	1.547	Up	0.00112	51.627
Alpha/Beta hydrolase fold	2.98858e-06	Unigene18296_All	87 968 PREDICTED: palmitoyl-protein thioesterase 1-like [Acyrthosiphon pisum]	1.664	Up	0.00136	33.699
Alpha/Beta hydrolase fold	2.98858e-06	Unigene12646_All	"21 2036 PREDICTED: fatty acyl-CoA hydrolase precursor, medium chain-like [Acyrthosiphon pisum]"	1.203	Up	0.0137	72.616
Alpha/Beta hydrolase fold	2.98858e-06	Unigene12628_All	162 1289 PREDICTED: similar to phosphatidylcholine-sterol acyltransferase (lecithin-cholesterol acyltransferase) [Tribolium castaneum]	1.363	Up	0.0109	42.257
Alpha/Beta hydrolase fold	2.98858e-06	Unigene3640_All	4 1164 minus strand PREDICTED: venom carboxylesterase-6-like [Apis mellifera]	1.276	Up	0.00692	44.305
Alpha/Beta hydrolase fold	2.98858e-06	Unigene14064_All	11 1600 PREDICTED: venom carboxylesterase-6-like [Bombus terrestris]	1.552	Up	0.00163	59.779
Alpha/Beta hydrolase fold	2.98858e-06	Unigene17035_All	5 2059 PREDICTED: fatty acid synthase-like [Acyrthosiphon pisum]	1.324	Up	0.0498	76.457
Alpha/Beta hydrolase fold	2.98858e-06	Unigene18213_All	29 1417 minus strand PREDICTED: venom serine carboxypeptidase-like [Bombus terrestris]	1.595	Up	0.0204	52.784
Alpha/Beta hydrolase fold	2.98858e-06	Unigene14979_All	300 1508 venom serine carboxypeptidase [Danaus plexippus]	1.444	Up	0.0316	45.807
Alpha/Beta hydrolase fold	2.98858e-06	Unigene6580_All	66 1193 minus strand PREDICTED: similar to plasma PAF acetylhydrolase [Tribolium castaneum]	1.306	Up	0.0316	42.97
Alpha/Beta hydrolase fold	2.98858e-06	Unigene3619_All	61 1584 PREDICTED: venom carboxylesterase-6-like [Bombus impatiens]	2.052	Up	0.0247	56.908
Alpha/Beta hydrolase fold	2.98858e-06	CL5229.Contig2_All	50 1021 minus strand PREDICTED: venom carboxylesterase-6 isoform 1 [Nasonia vitripennis] >gi|345497206|ref|XP_003427935.1| PREDICTED: venom carboxylesterase-6 isoform 2 [Nasonia vitripennis]	1.322	Up	0.00659	35.358
Alpha/Beta hydrolase fold	2.98858e-06	Unigene3633_All	396 1748 PREDICTED: similar to juvenile hormone epoxide hydrolase [Tribolium castaneum]	1.368	Up	0.0184	51.695
Alpha/Beta hydrolase fold	2.98858e-06	CL1175.Contig2_All	40 1677 minus strand PREDICTED: venom carboxylesterase-6-like [Acyrthosiphon pisum]	1.616	Up	0.00771	60.539
Alpha/Beta hydrolase fold	2.98858e-06	Unigene15044_All	2 1102 minus strand PREDICTED: venom carboxylesterase-6-like [Acyrthosiphon pisum]	1.972	Up	0.0121	41.39
Alpha/Beta hydrolase fold	2.98858e-06	Unigene9896_All	240 1625 PREDICTED: similar to thymus-specific serine protease [Tribolium castaneum]	1.612	Up	0.0025	52.646
Alpha/Beta hydrolase fold	2.98858e-06	CL5229.Contig1_All	137 595 minus strand carboxyl/choline esterase CCE006a [Helicoverpa armigera]	1.413	Up	0.0268	17.816
Alpha/Beta hydrolase fold	2.98858e-06	Unigene6419_All	65 1402 minus strand PREDICTED: similar to juvenile hormone epoxide hydrolase [Tribolium castaneum]	1.416	Up	0.0301	51.222
Alpha/Beta hydrolase fold	2.98858e-06	Unigene4570_All	88 1671 minus strand esterase [Lygus lineolaris]	1.414	Up	0.000845	58.388
Alpha/Beta hydrolase fold	2.98858e-06	Unigene11941_All	1 1104 minus strand PREDICTED: venom carboxylesterase-6-like [Acyrthosiphon pisum]	1.395	Up	0.0497	40.914
Thioredoxin-like fold	0.249345	Unigene1270_All	1 462 glutathione S-transferase sigma 3 [Locusta migratoria]	1.448	Up	0.0296	17.16
Thioredoxin-like fold	0.249345	Unigene1571_All	97 981 minus strand ganglioside-induced differentiation-associated-protein [Bombyx mori] >gi|315177973|gb|ADT82940.1| ganglioside-induced differentiation-associated-protein [Bombyx mori]	1.202	Up	0.0077	33.889
Thioredoxin-like fold	0.249345	CL2199.Contig1_All	107 751 minus strand AGAP002898-PC [Anopheles gambiae str. PEST] >gi|347968788|ref|XP_003436291.1| AGAP002898-PD [Anopheles gambiae str. PEST] >gi|333467833|gb|EGK96714.1| AGAP002898-PC [Anopheles gambiae str. PEST] >gi|333467834|gb|EGK96715.1| AGAP002898-PD [Anopheles gambiae str. PEST]	1.398	Up	0.0322	24.81
Thioredoxin-like fold	0.249345	Unigene6996_All	81 242 minus strand glutathione S-transferase S2 [Laodelphax striatellus]	1.530	Up	0.0353	6.5176
Thioredoxin-like fold	0.249345	Unigene18246_All	161 760 glutathione S-transferase-like [Acyrthosiphon pisum] >gi|239790948|dbj|BAH72002.1| ACYPI002679 [Acyrthosiphon pisum]	1.553	Up	0.0179	24.096
Thioredoxin-like fold	0.249345	CL760.Contig1_All	7 1236 Protein disulfide-isomerase A5 [Camponotus floridanus]	1.243	Up	0.00312	48.541
Thioredoxin-like fold	0.249345	Unigene5766_All	141 626 minus strand PREDICTED: similar to 15 kDa selenoprotein [Tribolium castaneum]	1.237	Up	0.0189	18.464
Cytochrome b5-like heme/steroid binding domain	0.168947	Unigene3586_All	215 1423 minus strand AGAP010150-PA [Anopheles gambiae str. PEST] >gi|116118456|gb|EAA13844.4| AGAP010150-PA [Anopheles gambiae str. PEST]	1.255	Up	0.0187	46.963
Cytochrome b5-like heme/steroid binding domain	0.168947	Unigene18239_All	69 599 minus strand PREDICTED: similar to AGAP000767-PA [Tribolium castaneum]	1.307	Up	0.00216	19.879
ABC transporter type 1, transmembrane domain	0.727009	CL4557.Contig1_All	"4 1008 PREDICTED: ATP-binding cassette sub-family B member 6, mitochondrial-like isoform 2 [Nasonia vitripennis] >gi|345485391|ref|XP_001605354.2| PREDICTED: ATP-binding cassette sub-family B member 6, mitochondrial-like isoform 1 [Nasonia vitripennis]"	1.280	Up	0.026	37.195
ABC transporter type 1, transmembrane domain	0.727009	Unigene25105_All	9 611 PREDICTED: similar to abc transporter [Tribolium castaneum]	1.235	Up	0.0108	23.291
Ferritin-like superfamily	0.0971274	Unigene17997_All	92 793 minus strand ferritin subunit (glycosylated) [Nilaparvata lugens]	1.635	Up	0.00124	26.496
Ferritin-like superfamily	0.0971274	Unigene9695_All	373 897 minus strand PREDICTED: ferritin subunit-like [Bombus impatiens]	1.563	Up	0.0154	20.212
Ferritin-like superfamily	0.0971274	Unigene1596_All	185 700 ferritin [Triatoma infestans]	3.397	Up	0.000992	19.469
von Willebrand factor, type D domain	0.523395	CL914.Contig1_All	4 3567 minus strand PREDICTED: extracellular domains-containing protein CG31004-like [Nasonia vitripennis]	1.264	Up	0.00383	136.02
von Willebrand factor, type D domain	0.523395	Unigene10798_All	1 2433 vitellogenin [Lethocerus deyrollei]	1.291	Up	0.0282	93.247
Thiamin diphosphate-binding fold	0.523395	Unigene16116_All	198 2063 minus strand PREDICTED: transketolase-like protein 2-like isoform 1 [Bombus impatiens]	1.230	Up	0.018	67.607
Thiamin diphosphate-binding fold	0.523395	Unigene3597_All	587 2269 minus strand 2-hydroxyacyl-CoA lyase 1 [Camponotus floridanus]	1.316	Up	0.00748	60.924
Serum albumin-like	0.168947	Unigene32074_All	3 674 minus strand albumin [Sus scrofa domesticus]	3.836	Up	0.00635	25.238
Serum albumin-like	0.168947	Unigene28901_All	2 229 minus strand albumin [Sus scrofa]	5.731	Up	0.0312	8.5354
Polyketide synthase, enoylreductase domain	0.202557	Unigene4604_All	30 1343 PREDICTED: fatty acid synthase-like [Acyrthosiphon pisum]	1.388	Up	0.0288	48.523
Polyketide synthase, enoylreductase domain	0.202557	Unigene34324_All	46 1053 minus strand PREDICTED: prostaglandin reductase 1-like [Nasonia vitripennis]	1.206	Up	0.0071	36.702
Polyketide synthase, enoylreductase domain	0.202557	Unigene16082_All	62 1063 minus strand PREDICTED: prostaglandin reductase 1-like [Nasonia vitripennis]	1.499	Up	0.0269	36.296
Ferritin-related	0.0612817	Unigene17997_All	92 793 minus strand ferritin subunit (glycosylated) [Nilaparvata lugens]	1.635	Up	0.00124	26.496
Ferritin-related	0.0612817	Unigene9695_All	373 897 minus strand PREDICTED: ferritin subunit-like [Bombus impatiens]	1.563	Up	0.0154	20.212
Ferritin-related	0.0612817	Unigene1596_All	185 700 ferritin [Triatoma infestans]	3.397	Up	0.000992	19.469
CO dehydrogenase flavoprotein, C-terminal	0.116054	Unigene14646_All	35 4117 minus strand PREDICTED: xanthine dehydrogenase-like [Bombus terrestris]	1.201	Up	0.00947	150.96
CO dehydrogenase flavoprotein, C-terminal	0.116054	Unigene28262_All	4 789 minus strand Xanthine dehydrogenase/oxidase [Harpegnathos saltator]	1.713	Up	0.0289	29.176
AMP-binding enzyme C-terminal domain	0.650236	CL4464.Contig1_All	128 1792 PREDICTED: probable 4-coumarate--CoA ligase 3-like isoform 2 [Acyrthosiphon pisum] >gi|328708060|ref|XP_001948363.2| PREDICTED: probable 4-coumarate--CoA ligase 3-like isoform 1 [Acyrthosiphon pisum]	1.481	Up	0.00848	61.846
AMP-binding enzyme C-terminal domain	0.650236	CL3245.Contig1_All	109 1668 minus strand AMP dependent coa ligase [Aedes aegypti] >gi|108884645|gb|EAT48870.1| AMP dependent coa ligase [Aedes aegypti]	1.204	Up	0.0408	57.952
Aldehyde dehydrogenase domain	0.578861	CL1926.Contig1_All	280 2487 PREDICTED: delta-1-pyrroline-5-carboxylate synthase-like [Nasonia vitripennis]	1.272	Up	0.00939	79.601
Aldehyde dehydrogenase domain	0.578861	Unigene33048_All	"2 592 minus strand PREDICTED: succinate-semialdehyde dehydrogenase, mitochondrial-like isoform 1 [Acyrthosiphon pisum]"	1.223	Up	0.0185	21.547
Pyridoxal phosphate-dependent transferase, major region, subdomain 2	0.727009	CL750.Contig1_All	387 1769 minus strand PREDICTED: similar to 4-aminobutyrate aminotransferase [Tribolium castaneum]	1.772	Up	0.000295	51.43
Pyridoxal phosphate-dependent transferase, major region, subdomain 2	0.727009	Unigene3580_All	77 1495 minus strand kynurenine aminotransferase [Glossina morsitans morsitans]	1.238	Up	0.0203	53.372
NADP-dependent oxidoreductase domain	0.0185311	Unigene18282_All	400 1320 PREDICTED: similar to CG6084 CG6084-PA [Tribolium castaneum]	1.380	Up	1.84e-05	34.703
NADP-dependent oxidoreductase domain	0.0185311	CL3965.Contig2_All	136 1092 minus strand PREDICTED: alcohol dehydrogenase [NADP+] A-like [Apis mellifera]	1.264	Up	0.00425	36.218
NADP-dependent oxidoreductase domain	0.0185311	Unigene7913_All	110 1042 minus strand PREDICTED: alcohol dehydrogenase [NADP+] A-like [Nasonia vitripennis]	1.660	Up	0.0317	35.341
NADP-dependent oxidoreductase domain	0.0185311	Unigene2516_All	109 1032 PREDICTED: alcohol dehydrogenase [NADP+] A-like [Bombus impatiens]	1.712	Up	0.0497	35.511
Domain of unknown function DUF4773	0.26546	CL4228.Contig1_All	253 579 minus strand PREDICTED: CG8568-like [Saccoglossus kowalevskii]	2.011	Up	0.0485	12.347
Domain of unknown function DUF4773	0.26546	CL4228.Contig2_All	76 573 minus strand GJ21027 [Drosophila virilis] >gi|194143762|gb|EDW60158.1| GJ21027 [Drosophila virilis]	1.284	Up	0.0452	18.633
Galactose-binding domain-like	0.551983	CL146.Contig2_All	176 2119 minus strand PREDICTED: beta-glucuronidase-like [Acyrthosiphon pisum]	1.631	Up	0.0248	74.201
Galactose-binding domain-like	0.551983	Unigene18202_All	160 1980 minus strand PREDICTED: beta-galactosidase-like [Acyrthosiphon pisum]	1.951	Up	1.82e-05	68.82
Aldolase-type TIM barrel	0.0267924	Unigene20333_All	121 957 PREDICTED: N-acetylneuraminate lyase-like isoform 1 [Nasonia vitripennis] >gi|345489918|ref|XP_003426261.1| PREDICTED: N-acetylneuraminate lyase-like isoform 2 [Nasonia vitripennis]	1.529	Up	0.00297	30.868
Aldolase-type TIM barrel	0.0267924	Unigene10512_All	2 3025 minus strand Putative glutamate synthase [NADPH] [Harpegnathos saltator]	1.472	Up	0.000853	109.7
Aldolase-type TIM barrel	0.0267924	Unigene33534_All	19 906 Putative glutamate synthase [NADPH] [Harpegnathos saltator]	1.359	Up	0.00258	32.998
Aldolase-type TIM barrel	0.0267924	CL595.Contig1_All	22 3018 minus strand PREDICTED: dihydropyrimidine dehydrogenase [NADP+]-like isoform 1 [Apis mellifera]	1.395	Up	0.00185	109.55
Aldolase-type TIM barrel	0.0267924	Unigene20261_All	354 1904 PREDICTED: uncharacterized family 31 glucosidase KIAA1161-like [Nasonia vitripennis]	2.594	Up	0.000612	59.033
Aldolase-type TIM barrel	0.0267924	Unigene22765_All	84 365 minus strand GMP reductase 1 [Harpegnathos saltator]	1.285	Up	0.00379	10.833
GroES-like	0.0563618	Unigene9975_All	57 1100 minus strand sorbitol dehydrogenase [Pyrrhocoris apterus]	1.344	Up	0.000184	37.608
GroES-like	0.0563618	Unigene4604_All	30 1343 PREDICTED: fatty acid synthase-like [Acyrthosiphon pisum]	1.388	Up	0.0288	48.523
GroES-like	0.0563618	Unigene34324_All	46 1053 minus strand PREDICTED: prostaglandin reductase 1-like [Nasonia vitripennis]	1.206	Up	0.0071	36.702
GroES-like	0.0563618	Unigene16082_All	62 1063 minus strand PREDICTED: prostaglandin reductase 1-like [Nasonia vitripennis]	1.499	Up	0.0269	36.296
Pyrroline-5-carboxylate reductase, dimerisation domain	0.116054	Unigene1610_All	96 899 PREDICTED: similar to GA19292-PA [Tribolium castaneum]	1.232	Up	0.0367	28.416
Pyrroline-5-carboxylate reductase, dimerisation domain	0.116054	Unigene1445_All	78 878 minus strand PREDICTED: similar to pyrroline-5-carboxylate reductase [Tribolium castaneum]	1.625	Up	0.0121	28.223
Carboxylesterase, type B	9.1924e-05	CL1175.Contig2_All	40 1677 minus strand PREDICTED: venom carboxylesterase-6-like [Acyrthosiphon pisum]	1.616	Up	0.00771	60.539
Carboxylesterase, type B	9.1924e-05	Unigene12646_All	"21 2036 PREDICTED: fatty acyl-CoA hydrolase precursor, medium chain-like [Acyrthosiphon pisum]"	1.203	Up	0.0137	72.616
Carboxylesterase, type B	9.1924e-05	Unigene15044_All	2 1102 minus strand PREDICTED: venom carboxylesterase-6-like [Acyrthosiphon pisum]	1.972	Up	0.0121	41.39
Carboxylesterase, type B	9.1924e-05	Unigene3640_All	4 1164 minus strand PREDICTED: venom carboxylesterase-6-like [Apis mellifera]	1.276	Up	0.00692	44.305
Carboxylesterase, type B	9.1924e-05	Unigene14064_All	11 1600 PREDICTED: venom carboxylesterase-6-like [Bombus terrestris]	1.552	Up	0.00163	59.779
Carboxylesterase, type B	9.1924e-05	Unigene3619_All	61 1584 PREDICTED: venom carboxylesterase-6-like [Bombus impatiens]	2.052	Up	0.0247	56.908
Carboxylesterase, type B	9.1924e-05	CL5229.Contig1_All	137 595 minus strand carboxyl/choline esterase CCE006a [Helicoverpa armigera]	1.413	Up	0.0268	17.816
Carboxylesterase, type B	9.1924e-05	Unigene4570_All	88 1671 minus strand esterase [Lygus lineolaris]	1.414	Up	0.000845	58.388
Carboxylesterase, type B	9.1924e-05	CL5229.Contig2_All	50 1021 minus strand PREDICTED: venom carboxylesterase-6 isoform 1 [Nasonia vitripennis] >gi|345497206|ref|XP_003427935.1| PREDICTED: venom carboxylesterase-6 isoform 2 [Nasonia vitripennis]	1.322	Up	0.00659	35.358
Carboxylesterase, type B	9.1924e-05	Unigene11941_All	1 1104 minus strand PREDICTED: venom carboxylesterase-6-like [Acyrthosiphon pisum]	1.395	Up	0.0497	40.914
Immunoglobulin I-set	0.41962	CL885.Contig1_All	27 2687 Basement membrane-specific heparan sulfate proteoglycan core protein [Harpegnathos saltator]	1.483	Up	0.00461	98.248
Immunoglobulin I-set	0.41962	Unigene18190_All	2 2137 PREDICTED: twitchin-like [Bombus impatiens]	1.203	Up	0.0299	78.638
Immunoglobulin I-set	0.41962	Unigene20294_All	249 854 PREDICTED: contactin-2-like [Acyrthosiphon pisum]	1.223	Up	0.0315	22.302
Immunoglobulin I-set	0.41962	CL1313.Contig2_All	2 6778 minus strand PREDICTED: LOW QUALITY PROTEIN: twitchin [Apis mellifera]	1.225	Up	0.000166	252.35
Immunoglobulin I-set	0.41962	Unigene13119_All	1 357 PREDICTED: similar to BMKETTIN [Tribolium castaneum]	1.365	Up	0.0177	13.592
Alcohol dehydrogenase, C-terminal	0.0310922	Unigene9975_All	57 1100 minus strand sorbitol dehydrogenase [Pyrrhocoris apterus]	1.344	Up	0.000184	37.608
Alcohol dehydrogenase, C-terminal	0.0310922	Unigene4604_All	30 1343 PREDICTED: fatty acid synthase-like [Acyrthosiphon pisum]	1.388	Up	0.0288	48.523
Alcohol dehydrogenase, C-terminal	0.0310922	Unigene34324_All	46 1053 minus strand PREDICTED: prostaglandin reductase 1-like [Nasonia vitripennis]	1.206	Up	0.0071	36.702
Alcohol dehydrogenase, C-terminal	0.0310922	Unigene16082_All	62 1063 minus strand PREDICTED: prostaglandin reductase 1-like [Nasonia vitripennis]	1.499	Up	0.0269	36.296
Ferritin-like diiron domain	0.019727	Unigene17997_All	92 793 minus strand ferritin subunit (glycosylated) [Nilaparvata lugens]	1.635	Up	0.00124	26.496
Ferritin-like diiron domain	0.019727	Unigene9695_All	373 897 minus strand PREDICTED: ferritin subunit-like [Bombus impatiens]	1.563	Up	0.0154	20.212
Ferritin-like diiron domain	0.019727	Unigene1596_All	185 700 ferritin [Triatoma infestans]	3.397	Up	0.000992	19.469
D-galactoside/L-rhamnose binding SUEL lectin domain	0.0315902	CL5438.Contig1_All	"259 1116 PREDICTED: similar to thrombospondin type 1 repeat-containing protein 2, partial [Hydra magnipapillata]"	4.487	Up	0.0136	32.082
D-galactoside/L-rhamnose binding SUEL lectin domain	0.0315902	Unigene13979_All	121 618 minus strand rhamnose binding lectin STL3 precursor [Oncorhynchus mykiss] >gi|11414860|dbj|BAA92257.3| rhamnose binding lectin STL3 [Oncorhynchus mykiss]	1.610	Up	0.00777	18.572
D-galactoside/L-rhamnose binding SUEL lectin domain	0.0315902	Unigene16385_All	3 335 rhamnose binding lectin STL3 precursor [Oncorhynchus mykiss] >gi|11414860|dbj|BAA92257.3| rhamnose binding lectin STL3 [Oncorhynchus mykiss]	1.749	Up	0.0162	12.497
Peptidase S1, PA clan	0.000234093	CL1077.Contig1_All	"1089 2804 minus strand Transmembrane protease, serine 9 [Harpegnathos saltator]"	1.244	Up	0.015	61.858
Peptidase S1, PA clan	0.000234093	Unigene13889_All	1 714 minus strand trypsin-like protease [Ranatra unicolor]	1.340	Up	0.00921	26.457
Peptidase S1, PA clan	0.000234093	CL515.Contig1_All	5 706 minus strand trypsin precursor LlSgP3 [Lygus lineolaris]	1.389	Up	0.0189	25.644
Peptidase S1, PA clan	0.000234093	Unigene18257_All	90 848 minus strand trypsin-like protease [Ranatra unicolor]	1.579	Up	0.00106	28.034
Peptidase S1, PA clan	0.000234093	Unigene18412_All	2 424 Serine proteinase stubble [Camponotus floridanus]	1.378	Up	0.0284	15.632
Peptidase S1, PA clan	0.000234093	Unigene3411_All	2 721 minus strand trypsin precursor LlSgP4 [Lygus lineolaris]	1.404	Up	0.000218	26.811
Peptidase S1, PA clan	0.000234093	Unigene4120_All	4 351 salivary trypsin [Triatoma infestans]	1.314	Up	0.0456	12.709
Peptidase S1, PA clan	0.000234093	Unigene5660_All	58 1467 minus strand PREDICTED: similar to trypsin-like serine protease [Tribolium castaneum]	1.546	Up	0.0195	51.273
Peptidase S1, PA clan	0.000234093	CL3794.Contig2_All	76 906 trypsin precursor LlGtP1 [Lygus lineolaris]	1.540	Up	0.0022	30.773
Peptidase S1, PA clan	0.000234093	Unigene1577_All	53 862 minus strand trypsin precursor LlSgP3 [Lygus lineolaris]	1.553	Up	0.00322	29.989
Peptidase S1, PA clan	0.000234093	Unigene3337_All	19 894 gluten hydrolyzing proteinase [Eurygaster integriceps]	2.590	Up	0.015	31.512
Peptidase S1, PA clan	0.000234093	Unigene20396_All	2 721 trypsin precursor LlSgP4 [Lygus lineolaris]	1.445	Up	0.0342	26.721
Peptidase S1, PA clan	0.000234093	Unigene11900_All	2 547 serine protease [Laccotrephes japonensis]	1.229	Up	0.0172	19.828
Peptidase S1, PA clan	0.000234093	CL184.Contig3_All	103 984 minus strand secreted salivary trypsin [Triatoma matogrossensis]	2.170	Up	0.00485	32.214
Peptidase S1, PA clan	0.000234093	Unigene8582_All	20 1189 PREDICTED: serine protease snake-like [Bombus impatiens]	1.856	Up	0.0406	42.675
Peptidase S1, PA clan	0.000234093	Unigene2476_All	9 2690 minus strand Neurotrypsin [Camponotus floridanus]	1.318	Up	0.000327	98.5
Glutathione S-transferase, C-terminal-like	0.249282	Unigene1270_All	1 462 glutathione S-transferase sigma 3 [Locusta migratoria]	1.448	Up	0.0296	17.16
Glutathione S-transferase, C-terminal-like	0.249282	Unigene1571_All	97 981 minus strand ganglioside-induced differentiation-associated-protein [Bombyx mori] >gi|315177973|gb|ADT82940.1| ganglioside-induced differentiation-associated-protein [Bombyx mori]	1.202	Up	0.0077	33.889
Glutathione S-transferase, C-terminal-like	0.249282	CL2199.Contig1_All	107 751 minus strand AGAP002898-PC [Anopheles gambiae str. PEST] >gi|347968788|ref|XP_003436291.1| AGAP002898-PD [Anopheles gambiae str. PEST] >gi|333467833|gb|EGK96714.1| AGAP002898-PC [Anopheles gambiae str. PEST] >gi|333467834|gb|EGK96715.1| AGAP002898-PD [Anopheles gambiae str. PEST]	1.398	Up	0.0322	24.81
Glutathione S-transferase, C-terminal-like	0.249282	Unigene18246_All	161 760 glutathione S-transferase-like [Acyrthosiphon pisum] >gi|239790948|dbj|BAH72002.1| ACYPI002679 [Acyrthosiphon pisum]	1.553	Up	0.0179	24.096
