# Supplementary material for: Differential Proteomics Analysis Unraveled Mechanisms of Arma chinensis Responding to Improved Artificial Diet
Source: Insects. 2022 Jul 2;13(7):605. doi: 10.3390/insects13070605 (PMC9319121; doi:10.3390/insects13070605)
Supplement: Supplementary file 1 [file insects-13-00605-s001.zip › Supplementary Table S17.xlsx]

## Sheet: Down Domain2Protein
Table S17. Protein domain enrichment analysis for the down-regulated DEPs in IADN/COSMN.
Domain Description	Fisher's exact test p value	Protein accession	Protein description	IADN/COSMN Ratio	Regulated Type	IADN/COSMN P value	MW [kDa]
RNA helicase, DEAD-box type, Q motif	0.604112	Unigene12554_All	269 631 minus strand PREDICTED: ATP-dependent RNA helicase p62-like [Nasonia vitripennis]	0.767	Down	0.035	13.403
RNA helicase, DEAD-box type, Q motif	0.604112	CL4427.Contig2_All	115 1638 PREDICTED: ATP-dependent RNA helicase p62-like [Nasonia vitripennis]	0.773	Down	0.0175	56.669
Uncharacterised domain, cysteine-rich	0.123732	CL1350.Contig1_All	9 2042 minus strand PREDICTED: hemocytin-like [Acyrthosiphon pisum]	0.827	Down	0.0198	74.975
Uncharacterised domain, cysteine-rich	0.123732	Unigene25919_All	7 999 minus strand PREDICTED: hemocytin-like [Acyrthosiphon pisum]	0.772	Down	0.0462	37.098
K Homology domain	0.506171	Unigene20243_All	189 3902 minus strand PREDICTED: vigilin-like [Apis mellifera]	0.832	Down	0.0125	138.76
K Homology domain	0.506171	CL747.Contig2_All	7 6360 Ankyrin repeat domain-containing protein 17 [Harpegnathos saltator]	0.828	Down	0.0055	225.69
Peptidase family A1 domain	0.000203268	Unigene7919_All	65 1111 minus strand PREDICTED: similar to cathepsin D isoform 1 [Tribolium castaneum]	0.462	Down	0.0203	38.522
Peptidase family A1 domain	0.000203268	CL1726.Contig2_All	80 1168 PREDICTED: similar to cathepsin D isoform 1 [Tribolium castaneum]	0.333	Down	0.00211	40.422
Peptidase family A1 domain	0.000203268	Unigene3551_All	221 1162 PREDICTED: cathepsin D-like [Oreochromis niloticus]	0.724	Down	0.0187	35.564
Peptidase family A1 domain	0.000203268	Unigene14022_All	40 1200 minus strand PREDICTED: lysosomal aspartic protease [Apis mellifera]	0.598	Down	0.0298	42.106
Peptidase family A1 domain	0.000203268	Unigene3569_All	25 1173 minus strand aspartyl protease [Triatoma infestans]	0.700	Down	0.000384	42.503
Aromatic amino acid hydroxylase, C-terminal	0.0842799	Unigene18170_All	71 1378 phenylalanine-tryptophan hydroxylase [Gryllus bimaculatus]	0.623	Down	0.0499	49.963
Aromatic amino acid hydroxylase, C-terminal	0.0842799	Unigene14051_All	191 1885 minus strand AGAP006023-PA [Anopheles gambiae str. PEST] >gi|157015912|gb|EAA44132.3| AGAP006023-PA [Anopheles gambiae str. PEST]	0.400	Down	0.0399	64.477
Glycoside hydrolase family 18, catalytic domain	0.1196	Unigene9901_All	178 1401 minus strand imaginal disk growth factor precursor [Acyrthosiphon pisum]	0.692	Down	0.0211	45.565
Glycoside hydrolase family 18, catalytic domain	0.1196	Unigene7845_All	85 1362 imaginal disc growth factor-like protein [Mamestra brassicae]	0.670	Down	0.000776	47.474
Glycoside hydrolase family 18, catalytic domain	0.1196	CL3932.Contig1_All	105 1331 imaginal disc growth factor [Bombus ignitus]	0.702	Down	0.0136	45.732
Pyridoxal phosphate-dependent transferase	0.734253	Unigene18212_All	81 1451 minus strand Alanine--glyoxylate aminotransferase 2-like protein [Acromyrmex echinatior]	0.745	Down	0.0117	51.075
Pyridoxal phosphate-dependent transferase	0.734253	Unigene19067_All	83 1663 minus strand Sphingosine-1-phosphate lyase [Harpegnathos saltator]	0.735	Down	0.0242	59.033
Glycoside hydrolase superfamily	0.0712306	Unigene9901_All	178 1401 minus strand imaginal disk growth factor precursor [Acyrthosiphon pisum]	0.692	Down	0.0211	45.565
Glycoside hydrolase superfamily	0.0712306	Unigene7845_All	85 1362 imaginal disc growth factor-like protein [Mamestra brassicae]	0.670	Down	0.000776	47.474
Glycoside hydrolase superfamily	0.0712306	CL3932.Contig1_All	105 1331 imaginal disc growth factor [Bombus ignitus]	0.702	Down	0.0136	45.732
Glycoside hydrolase superfamily	0.0712306	Unigene1519_All	"235 1605 minus strand RecName: Full=Myrosinase 1; AltName: Full=Beta-glucosidase 1; AltName: Full=Beta-thioglucosidase 1; AltName: Full=Beta-thioglucosidase glucohydrolase 1; AltName: Full=Sinigrinase 1; AltName: Full=Thioglucosidase 1 >gi|83753522|pdb|1WCG|A Chain A, Aphid Myrosinase >gi|83753523|pdb|1WCG|B Chain B, Aphid Myrosinase >gi|16564883|gb|AAL25999.1|AF203780_1 thioglucosidase [Brevico…	0.766	Down	0.0292	52.881
Glycoside hydrolase superfamily	0.0712306	Unigene9907_All	58 1437 alpha-amylase [Blattella germanica]	0.575	Down	0.00474	51.817
Glycoside hydrolase superfamily	0.0712306	Unigene362_All	187 1836 minus strand beta-N-acetylglucosaminidase 1 precursor [Bombyx mori] >gi|139004970|dbj|BAF52531.1| beta-N-acetylglucosaminidase 1 [Bombyx mori]	0.815	Down	0.0496	62.77
Heat shock protein 70kD, peptide-binding domain	0.327357	Unigene15048_All	281 2176 heat shock cognate 70 [Aedes aegypti]	0.830	Down	0.0127	70.079
Heat shock protein 70kD, peptide-binding domain	0.327357	Unigene8052_All	1 675 minus strand Hsp70 [Mythimna separata]	0.196	Down	0.0128	24.549
Pyridoxal phosphate-dependent transferase, major region, subdomain 1	0.696463	Unigene18212_All	81 1451 minus strand Alanine--glyoxylate aminotransferase 2-like protein [Acromyrmex echinatior]	0.745	Down	0.0117	51.075
Pyridoxal phosphate-dependent transferase, major region, subdomain 1	0.696463	Unigene19067_All	83 1663 minus strand Sphingosine-1-phosphate lyase [Harpegnathos saltator]	0.735	Down	0.0242	59.033
Major facilitator superfamily domain	0.547947	Unigene10595_All	9 1373 minus strand sugar transporter 2 [Nilaparvata lugens]	0.756	Down	0.0173	49.419
Major facilitator superfamily domain	0.547947	Unigene4507_All	244 2160 minus strand PREDICTED: solute carrier organic anion transporter family member 5A1-like [Bombus terrestris]	0.685	Down	0.0141	70.739
AMP-dependent synthetase/ligase	0.682714	Unigene6373_All	228 2123 minus strand PREDICTED: long-chain fatty acid transport protein 4-like isoform 2 [Nasonia vitripennis] >gi|345493605|ref|XP_001603871.2| PREDICTED: long-chain fatty acid transport protein 4-like isoform 1 [Nasonia vitripennis]	0.759	Down	0.0162	70.296
AMP-dependent synthetase/ligase	0.682714	CL3154.Contig1_All	26 2629 minus strand GJ14444 [Drosophila virilis] >gi|194142036|gb|EDW58444.1| GJ14444 [Drosophila virilis]	0.595	Down	0.0112	97.33
Tetratricopeptide repeat-containing domain	0.178598	Unigene19123_All	138 1598 minus strand PREDICTED: dnaJ homolog subfamily C member 7-like isoform 1 [Nasonia vitripennis]	0.785	Down	0.0181	55.652
Tetratricopeptide repeat-containing domain	0.178598	CL3444.Contig6_All	248 1921 PREDICTED: kinesin light chain-like isoform 2 [Bombus terrestris] >gi|350396095|ref|XP_003484440.1| PREDICTED: kinesin light chain-like isoform 2 [Bombus impatiens]	0.791	Down	0.0166	62.793
Tetratricopeptide repeat-containing domain	0.178598	Unigene16777_All	1 756 minus strand Cell division cycle protein 23-like protein [Camponotus floridanus]	0.046	Down	0.00818	29.11
Tetratricopeptide repeat-containing domain	0.178598	Unigene3589_All	108 1739 minus strand PREDICTED: stress-induced-phosphoprotein 1-like [Nasonia vitripennis]	0.827	Down	0.00367	61.603
Serpin domain	0.00237026	Unigene13852_All	2 490 serpin-6 [Manduca sexta]	0.434	Down	0.000426	18.136
Serpin domain	0.00237026	Unigene15946_All	72 809 seminal fluid protein CSSFP042 [Chilo suppressalis]	0.525	Down	0.0118	27.822
Serpin domain	0.00237026	Unigene38786_All	1 273 minus strand serine protease inhibitor 4 [Lonomia obliqua]	0.200	Down	0.00805	10.004
Serpin domain	0.00237026	Unigene43006_All	1 372 minus strand serpin 2 [Lonomia obliqua]	0.144	Down	0.0251	13.611
Serpin domain	0.00237026	Unigene39622_All	13 267 serpin-like protein [Antheraea mylitta]	0.223	Down	0.0247	9.859
Signal recognition particle, SRP54 subunit, helical bundle	0.0842799	CL3526.Contig1_All	118 1629 minus strand PREDICTED: similar to AGAP004610-PA [Tribolium castaneum]	0.759	Down	0.0366	55.407
Signal recognition particle, SRP54 subunit, helical bundle	0.0842799	Unigene18189_All	95 1948 PREDICTED: signal recognition particle receptor subunit alpha homolog isoform 2 [Nasonia vitripennis]	0.757	Down	0.0112	68.989
Reeler domain	0.000569604	Unigene11905_All	62 529 minus strand salivary secreted protein [Triatoma infestans]	0.794	Down	0.0417	16.685
Reeler domain	0.000569604	CL3048.Contig1_All	46 339 RecName: Full=Putative defense protein 3; Short=DFP-3; Flags: Precursor	0.252	Down	0.00263	10.416
Reeler domain	0.000569604	Unigene33822_All	2 190 RecName: Full=Putative defense protein 3; Short=DFP-3; Flags: Precursor	0.159	Down	0.0333	6.8558
Reeler domain	0.000569604	Unigene20247_All	240 2204 PREDICTED: similar to f-spondin [Tribolium castaneum]	0.768	Down	0.0393	73.877
Reeler domain	0.000569604	CL3048.Contig3_All	3 230 RecName: Full=Putative defense protein 2; Short=DFP-2; Flags: Precursor	0.205	Down	0.0131	7.8749
EF-hand domain	0.293961	Unigene1271_All	58 513 minus strand Myosin-2 essential light chain [Camponotus floridanus]	0.573	Down	0.00106	17.371
EF-hand domain	0.293961	Unigene6286_All	166 834 GK22695 [Drosophila willistoni] >gi|194168244|gb|EDW83145.1| GK22695 [Drosophila willistoni]	0.699	Down	0.0106	25.575
EF-hand domain	0.293961	Unigene5487_All	145 672 minus strand Myosin regulatory light chain sqh [Acromyrmex echinatior]	0.756	Down	0.00191	20.279
EF-hand domain	0.293961	CL5353.Contig1_All	3 3851 minus strand PREDICTED: intersectin-1-like [Bombus terrestris]	0.813	Down	0.0466	141.17
K Homology domain, type 1	0.586207	Unigene20243_All	189 3902 minus strand PREDICTED: vigilin-like [Apis mellifera]	0.832	Down	0.0125	138.76
K Homology domain, type 1	0.586207	CL747.Contig2_All	7 6360 Ankyrin repeat domain-containing protein 17 [Harpegnathos saltator]	0.828	Down	0.0055	225.69
Glycoside hydrolase, catalytic domain	0.0460536	Unigene9901_All	178 1401 minus strand imaginal disk growth factor precursor [Acyrthosiphon pisum]	0.692	Down	0.0211	45.565
Glycoside hydrolase, catalytic domain	0.0460536	Unigene7845_All	85 1362 imaginal disc growth factor-like protein [Mamestra brassicae]	0.670	Down	0.000776	47.474
Glycoside hydrolase, catalytic domain	0.0460536	CL3932.Contig1_All	105 1331 imaginal disc growth factor [Bombus ignitus]	0.702	Down	0.0136	45.732
Glycoside hydrolase, catalytic domain	0.0460536	Unigene1519_All	"235 1605 minus strand RecName: Full=Myrosinase 1; AltName: Full=Beta-glucosidase 1; AltName: Full=Beta-thioglucosidase 1; AltName: Full=Beta-thioglucosidase glucohydrolase 1; AltName: Full=Sinigrinase 1; AltName: Full=Thioglucosidase 1 >gi|83753522|pdb|1WCG|A Chain A, Aphid Myrosinase >gi|83753523|pdb|1WCG|B Chain B, Aphid Myrosinase >gi|16564883|gb|AAL25999.1|AF203780_1 thioglucosidase [Brevico…	0.766	Down	0.0292	52.881
Glycoside hydrolase, catalytic domain	0.0460536	Unigene9907_All	58 1437 alpha-amylase [Blattella germanica]	0.575	Down	0.00474	51.817
Glycoside hydrolase, catalytic domain	0.0460536	Unigene362_All	187 1836 minus strand beta-N-acetylglucosaminidase 1 precursor [Bombyx mori] >gi|139004970|dbj|BAF52531.1| beta-N-acetylglucosaminidase 1 [Bombyx mori]	0.815	Down	0.0496	62.77
Translation protein, beta-barrel domain	0.567498	CL732.Contig1_All	89 1753 minus strand PREDICTED: eukaryotic peptide chain release factor GTP-binding subunit ERF3B-like [Bombus terrestris]	0.828	Down	0.0208	60.951
Translation protein, beta-barrel domain	0.567498	Unigene5195_All	"2 1513 minus strand elongation factor G 1, mitochondrial [Culex quinquefasciatus] >gi|261263143|sp|B0WGM1.1|EFGM_CULQU RecName: Full=Elongation factor G, mitochondrial; Short=EF-Gmt; AltName: Full=Elongation factor G 1, mitochondrial; Short=mEF-G 1; AltName: Full=Elongation factor G1; Flags: Precursor >gi|167863667|gb|EDS27050.1| elongation factor G 1, mitochondrial [Culex quinquefasciatus]"	0.789	Down	0.0185	56.627
Signal recognition particle, SRP54 subunit, GTPase domain	0.0842799	CL3526.Contig1_All	118 1629 minus strand PREDICTED: similar to AGAP004610-PA [Tribolium castaneum]	0.759	Down	0.0366	55.407
Signal recognition particle, SRP54 subunit, GTPase domain	0.0842799	Unigene18189_All	95 1948 PREDICTED: signal recognition particle receptor subunit alpha homolog isoform 2 [Nasonia vitripennis]	0.757	Down	0.0112	68.989
Heat shock protein Hsp90, N-terminal	0.0842799	CL331.Contig1_All	128 2281 minus strand heat shock protein 90 [Gryllus firmus]	0.805	Down	0.00374	82.6
Heat shock protein Hsp90, N-terminal	0.0842799	Unigene9891_All	106 2436 endoplasmin [Locusta migratoria]	0.677	Down	0.00503	88.485
Ubiquitin-conjugating enzyme E2	0.164617	Unigene18247_All	183 635 minus strand PREDICTED: similar to ubiquitin conjugating enzyme E2 [Tribolium castaneum]	0.796	Down	0.0107	17.195
Ubiquitin-conjugating enzyme E2	0.164617	Unigene20032_All	118 594 minus strand ubiquitin protein ligase [Glossina morsitans morsitans] >gi|289740111|gb|ADD18803.1| ubiquitin protein ligase [Glossina morsitans morsitans]	0.717	Down	0.0297	18.081
Ubiquitin-conjugating enzyme E2	0.164617	Unigene3574_All	147 587 effete [Drosophila melanogaster] >gi|187117170|ref|NP_001119686.1| effete [Acyrthosiphon pisum] >gi|58381090|ref|XP_310998.2| AGAP000145-PA [Anopheles gambiae str. PEST] >gi|157134117|ref|XP_001663154.1| ubiquitin-conjugating enzyme E2 [Aedes aegypti] >gi|194743322|ref|XP_001954149.1| GF18131 [Drosophila ananassae] >gi|194900836|ref|XP_001979961.1| GG21088 [Drosophila erecta] >gi|19506122…	0.778	Down	0.0196	16.678
NAD-dependent epimerase/dehydratase	0.161493	Unigene14094_All	80 1162 minus strand PREDICTED: similar to nad dependent epimerase/dehydratase [Tribolium castaneum]	0.822	Down	0.0305	40.212
NAD-dependent epimerase/dehydratase	0.161493	Unigene13434_All	123 995 minus strand PREDICTED: similar to CG8768 CG8768-PA [Tribolium castaneum]	0.728	Down	0.0208	32.025
Aspartic peptidase domain	0.000353609	Unigene7919_All	65 1111 minus strand PREDICTED: similar to cathepsin D isoform 1 [Tribolium castaneum]	0.462	Down	0.0203	38.522
Aspartic peptidase domain	0.000353609	CL1726.Contig2_All	80 1168 PREDICTED: similar to cathepsin D isoform 1 [Tribolium castaneum]	0.333	Down	0.00211	40.422
Aspartic peptidase domain	0.000353609	Unigene3551_All	221 1162 PREDICTED: cathepsin D-like [Oreochromis niloticus]	0.724	Down	0.0187	35.564
Aspartic peptidase domain	0.000353609	Unigene14022_All	40 1200 minus strand PREDICTED: lysosomal aspartic protease [Apis mellifera]	0.598	Down	0.0298	42.106
Aspartic peptidase domain	0.000353609	Unigene3569_All	25 1173 minus strand aspartyl protease [Triatoma infestans]	0.700	Down	0.000384	42.503
PLC-like phosphodiesterase, TIM beta/alpha-barrel domain	0.327357	CL60.Contig2_All	199 537 minus strand PREDICTED: similar to Phosphatidylinositol-specific phospholipase C X domain-containing protein 2 (PI-PLC X domain-containing protein 2) [Ciona intestinalis]	0.348	Down	0.0163	12.514
PLC-like phosphodiesterase, TIM beta/alpha-barrel domain	0.327357	CL5389.Contig1_All	175 1068 minus strand PREDICTED: PI-PLC X domain-containing protein 1 [Apis mellifera]	0.406	Down	0.0215	34.122
Histidine kinase-like ATPase, C-terminal domain	0.197635	CL331.Contig1_All	128 2281 minus strand heat shock protein 90 [Gryllus firmus]	0.805	Down	0.00374	82.6
Histidine kinase-like ATPase, C-terminal domain	0.197635	Unigene9891_All	106 2436 endoplasmin [Locusta migratoria]	0.677	Down	0.00503	88.485
Ubiquitin-conjugating enzyme/RWD-like	0.0662921	Unigene18247_All	183 635 minus strand PREDICTED: similar to ubiquitin conjugating enzyme E2 [Tribolium castaneum]	0.796	Down	0.0107	17.195
Ubiquitin-conjugating enzyme/RWD-like	0.0662921	Unigene20032_All	118 594 minus strand ubiquitin protein ligase [Glossina morsitans morsitans] >gi|289740111|gb|ADD18803.1| ubiquitin protein ligase [Glossina morsitans morsitans]	0.717	Down	0.0297	18.081
Ubiquitin-conjugating enzyme/RWD-like	0.0662921	Unigene3574_All	147 587 effete [Drosophila melanogaster] >gi|187117170|ref|NP_001119686.1| effete [Acyrthosiphon pisum] >gi|58381090|ref|XP_310998.2| AGAP000145-PA [Anopheles gambiae str. PEST] >gi|157134117|ref|XP_001663154.1| ubiquitin-conjugating enzyme E2 [Aedes aegypti] >gi|194743322|ref|XP_001954149.1| GF18131 [Drosophila ananassae] >gi|194900836|ref|XP_001979961.1| GG21088 [Drosophila erecta] >gi|19506122…	0.778	Down	0.0196	16.678
Ubiquitin-conjugating enzyme/RWD-like	0.0662921	Unigene3554_All	161 1300 PREDICTED: tumor susceptibility gene 101 protein-like [Bombus impatiens]	0.786	Down	0.00156	42.997
C-type lectin-like	0.197635	Unigene11807_All	134 766 minus strand C-type lectin 5 precursor [Apis mellifera]	0.609	Down	0.00184	24.039
C-type lectin-like	0.197635	Unigene1460_All	83 691 minus strand PREDICTED: similar to CG3244 CG3244-PA isoform 1 [Tribolium castaneum] >gi|91081903|ref|XP_976065.1| PREDICTED: similar to CG3244 CG3244-PA isoform 2 [Tribolium castaneum]	0.744	Down	0.0258	23.748
Mitochondrial carrier domain	0.696463	Unigene4411_All	"134 1021 minus strand PREDICTED: similar to adp,atp carrier protein [Tribolium castaneum]"	0.307	Down	0.000254	33.253
Mitochondrial carrier domain	0.696463	Unigene38156_All	1 354 adenine nucleotide translocase [Antheraea pernyi]	0.247	Down	0.0274	13.079
Ribosomal protein S5 domain 2-type fold, subgroup	0.196036	Unigene14967_All	7 1080 minus strand N-acetylgalactosamine kinase [Salmo salar] >gi|209154184|gb|ACI33324.1| N-acetylgalactosamine kinase [Salmo salar] >gi|223648620|gb|ACN11068.1| N-acetylgalactosamine kinase [Salmo salar]	0.805	Down	0.0136	39.182
Ribosomal protein S5 domain 2-type fold, subgroup	0.196036	CL1551.Contig2_All	79 903 minus strand PREDICTED: similar to ribosomal protein S2 [Tribolium castaneum]	0.823	Down	0.0049	29.45
Ribosomal protein S5 domain 2-type fold, subgroup	0.196036	Unigene5195_All	"2 1513 minus strand elongation factor G 1, mitochondrial [Culex quinquefasciatus] >gi|261263143|sp|B0WGM1.1|EFGM_CULQU RecName: Full=Elongation factor G, mitochondrial; Short=EF-Gmt; AltName: Full=Elongation factor G 1, mitochondrial; Short=mEF-G 1; AltName: Full=Elongation factor G1; Flags: Precursor >gi|167863667|gb|EDS27050.1| elongation factor G 1, mitochondrial [Culex quinquefasciatus]"	0.789	Down	0.0185	56.627
ATPase, AAA-type, core	0.696463	Unigene99_All	301 1620 minus strand vacuolar protein sorting 4 [Danaus plexippus]	0.773	Down	0.0329	49.476
ATPase, AAA-type, core	0.696463	CL5004.Contig2_All	24 914 minus strand PREDICTED: nuclear valosin-containing protein-like [Bombus impatiens]	0.771	Down	0.00481	32.635
AAA+ ATPase domain	0.210806	Unigene99_All	301 1620 minus strand vacuolar protein sorting 4 [Danaus plexippus]	0.773	Down	0.0329	49.476
AAA+ ATPase domain	0.210806	CL3526.Contig1_All	118 1629 minus strand PREDICTED: similar to AGAP004610-PA [Tribolium castaneum]	0.759	Down	0.0366	55.407
AAA+ ATPase domain	0.210806	Unigene18189_All	95 1948 PREDICTED: signal recognition particle receptor subunit alpha homolog isoform 2 [Nasonia vitripennis]	0.757	Down	0.0112	68.989
AAA+ ATPase domain	0.210806	Unigene7790_All	3 1208 minus strand PREDICTED: ATP-binding cassette sub-family D member 2-like [Acyrthosiphon pisum]	0.737	Down	0.0117	44.528
AAA+ ATPase domain	0.210806	CL5004.Contig2_All	24 914 minus strand PREDICTED: nuclear valosin-containing protein-like [Bombus impatiens]	0.771	Down	0.00481	32.635
Alpha crystallin/Hsp20 domain	0.384167	Unigene4456_All	83 613 minus strand heat shock protein 20.7 [Locusta migratoria]	0.731	Down	0.0298	20.339
Alpha crystallin/Hsp20 domain	0.384167	CL1793.Contig1_All	330 818 minus strand heat shock protein 20.7 [Schistocerca gregaria]	0.621	Down	0.00527	18.188
Tetratricopeptide-like helical domain	0.167378	Unigene19123_All	138 1598 minus strand PREDICTED: dnaJ homolog subfamily C member 7-like isoform 1 [Nasonia vitripennis]	0.785	Down	0.0181	55.652
Tetratricopeptide-like helical domain	0.167378	CL3444.Contig6_All	248 1921 PREDICTED: kinesin light chain-like isoform 2 [Bombus terrestris] >gi|350396095|ref|XP_003484440.1| PREDICTED: kinesin light chain-like isoform 2 [Bombus impatiens]	0.791	Down	0.0166	62.793
Tetratricopeptide-like helical domain	0.167378	Unigene5725_All	162 2036 minus strand PREDICTED: similar to mmr1/hsr1 GTP binding protein [Tribolium castaneum]	0.766	Down	0.00548	70.688
Tetratricopeptide-like helical domain	0.167378	Unigene16777_All	1 756 minus strand Cell division cycle protein 23-like protein [Camponotus floridanus]	0.046	Down	0.00818	29.11
Tetratricopeptide-like helical domain	0.167378	Unigene4339_All	229 2178 signal recognition particle [Aedes aegypti] >gi|108881114|gb|EAT45339.1| signal recognition particle [Aedes aegypti]	0.797	Down	0.0344	73.405
Tetratricopeptide-like helical domain	0.167378	Unigene3589_All	108 1739 minus strand PREDICTED: stress-induced-phosphoprotein 1-like [Nasonia vitripennis]	0.827	Down	0.00367	61.603
Cystatin domain	0.0335716	CL2155.Contig1_All	347 967 PREDICTED: similar to cathepsin F-like cysteine protease [Tribolium castaneum]	0.391	Down	0.00103	23.428
Cystatin domain	0.0335716	CL33.Contig1_All	63 1043 minus strand cathepsin F-like cysteine protease [Plautia stali]	0.249	Down	0.00212	37.184
Cystatin domain	0.0335716	Unigene11833_All	106 495 minus strand cathepsin F-like cysteine protease [Plautia stali]	0.782	Down	0.00641	14.535
C-type lectin-like/link domain	0.265338	Unigene11807_All	134 766 minus strand C-type lectin 5 precursor [Apis mellifera]	0.609	Down	0.00184	24.039
C-type lectin-like/link domain	0.265338	Unigene1460_All	83 691 minus strand PREDICTED: similar to CG3244 CG3244-PA isoform 1 [Tribolium castaneum] >gi|91081903|ref|XP_976065.1| PREDICTED: similar to CG3244 CG3244-PA isoform 2 [Tribolium castaneum]	0.744	Down	0.0258	23.748
von Willebrand factor, type D domain	0.410756	CL1350.Contig1_All	9 2042 minus strand PREDICTED: hemocytin-like [Acyrthosiphon pisum]	0.827	Down	0.0198	74.975
von Willebrand factor, type D domain	0.410756	Unigene25919_All	7 999 minus strand PREDICTED: hemocytin-like [Acyrthosiphon pisum]	0.772	Down	0.0462	37.098
Chitinase II	0.0916864	Unigene9901_All	178 1401 minus strand imaginal disk growth factor precursor [Acyrthosiphon pisum]	0.692	Down	0.0211	45.565
Chitinase II	0.0916864	Unigene7845_All	85 1362 imaginal disc growth factor-like protein [Mamestra brassicae]	0.670	Down	0.000776	47.474
Chitinase II	0.0916864	CL3932.Contig1_All	105 1331 imaginal disc growth factor [Bombus ignitus]	0.702	Down	0.0136	45.732
Ribosomal protein S5 domain 2-type fold	0.00956177	Unigene1531_All	2 1027 minus strand heat shock protein 90 [Gryllus firmus]	0.296	Down	0.003	40.54
Ribosomal protein S5 domain 2-type fold	0.00956177	CL331.Contig1_All	128 2281 minus strand heat shock protein 90 [Gryllus firmus]	0.805	Down	0.00374	82.6
Ribosomal protein S5 domain 2-type fold	0.00956177	Unigene14967_All	7 1080 minus strand N-acetylgalactosamine kinase [Salmo salar] >gi|209154184|gb|ACI33324.1| N-acetylgalactosamine kinase [Salmo salar] >gi|223648620|gb|ACN11068.1| N-acetylgalactosamine kinase [Salmo salar]	0.805	Down	0.0136	39.182
Ribosomal protein S5 domain 2-type fold	0.00956177	CL1551.Contig2_All	79 903 minus strand PREDICTED: similar to ribosomal protein S2 [Tribolium castaneum]	0.823	Down	0.0049	29.45
Ribosomal protein S5 domain 2-type fold	0.00956177	Unigene9891_All	106 2436 endoplasmin [Locusta migratoria]	0.677	Down	0.00503	88.485
Ribosomal protein S5 domain 2-type fold	0.00956177	Unigene5195_All	"2 1513 minus strand elongation factor G 1, mitochondrial [Culex quinquefasciatus] >gi|261263143|sp|B0WGM1.1|EFGM_CULQU RecName: Full=Elongation factor G, mitochondrial; Short=EF-Gmt; AltName: Full=Elongation factor G 1, mitochondrial; Short=mEF-G 1; AltName: Full=Elongation factor G1; Flags: Precursor >gi|167863667|gb|EDS27050.1| elongation factor G 1, mitochondrial [Culex quinquefasciatus]"	0.789	Down	0.0185	56.627
Aldolase-type TIM barrel	0.722208	CL2905.Contig2_All	2 1228 PREDICTED: inosine-5'-monophosphate dehydrogenase isoform 1 [Apis mellifera]	0.757	Down	0.0147	44.004
Aldolase-type TIM barrel	0.722208	Unigene14014_All	"90 1181 fructose 1,6-bisphosphate aldolase [Schistocerca gregaria]"	0.728	Down	0.00158	39.841
Longin-like domain	0.483865	Unigene6584_All	149 787 PREDICTED: similar to snare protein sec22 [Tribolium castaneum]	0.709	Down	0.0296	24.654
Longin-like domain	0.483865	Unigene18189_All	95 1948 PREDICTED: signal recognition particle receptor subunit alpha homolog isoform 2 [Nasonia vitripennis]	0.757	Down	0.0112	68.989
DnaJ domain	0.228117	Unigene19123_All	138 1598 minus strand PREDICTED: dnaJ homolog subfamily C member 7-like isoform 1 [Nasonia vitripennis]	0.785	Down	0.0181	55.652
DnaJ domain	0.228117	Unigene3684_All	131 811 minus strand DnaJ-like protein 4 [Danaus plexippus]	0.599	Down	0.0177	25.886
DnaJ domain	0.228117	Unigene8392_All	62 427 GK17173 [Drosophila willistoni] >gi|194157847|gb|EDW72748.1| GK17173 [Drosophila willistoni]	0.779	Down	0.0313	13.159
Chitinase insertion domain	0.0163208	Unigene9901_All	178 1401 minus strand imaginal disk growth factor precursor [Acyrthosiphon pisum]	0.692	Down	0.0211	45.565
Chitinase insertion domain	0.0163208	Unigene7845_All	85 1362 imaginal disc growth factor-like protein [Mamestra brassicae]	0.670	Down	0.000776	47.474
Chitinase insertion domain	0.0163208	CL3932.Contig1_All	105 1331 imaginal disc growth factor [Bombus ignitus]	0.702	Down	0.0136	45.732
Chitinase insertion domain	0.0163208	Unigene41865_All	2 217 hemocyte aggregation inhibitor protein precursor [Danaus plexippus]	0.123	Down	0.000352	7.8618
Translation elongation factor EFTu-like, domain 2	0.384167	CL732.Contig1_All	89 1753 minus strand PREDICTED: eukaryotic peptide chain release factor GTP-binding subunit ERF3B-like [Bombus terrestris]	0.828	Down	0.0208	60.951
Translation elongation factor EFTu-like, domain 2	0.384167	Unigene5195_All	"2 1513 minus strand elongation factor G 1, mitochondrial [Culex quinquefasciatus] >gi|261263143|sp|B0WGM1.1|EFGM_CULQU RecName: Full=Elongation factor G, mitochondrial; Short=EF-Gmt; AltName: Full=Elongation factor G 1, mitochondrial; Short=mEF-G 1; AltName: Full=Elongation factor G1; Flags: Precursor >gi|167863667|gb|EDS27050.1| elongation factor G 1, mitochondrial [Culex quinquefasciatus]"	0.789	Down	0.0185	56.627
HSP20-like chaperone	0.547947	Unigene4456_All	83 613 minus strand heat shock protein 20.7 [Locusta migratoria]	0.731	Down	0.0298	20.339
HSP20-like chaperone	0.547947	CL1793.Contig1_All	330 818 minus strand heat shock protein 20.7 [Schistocerca gregaria]	0.621	Down	0.00527	18.188
50S ribosomal protein L30e-like	0.265338	CL4142.Contig2_All	457 1764 minus strand Eukaryotic peptide chain release factor subunit 1 [Acromyrmex echinatior]	0.732	Down	0.0094	49.047
50S ribosomal protein L30e-like	0.265338	CL2767.Contig2_All	108 479 minus strand ribosomal protein S12 [Manduca sexta]	0.786	Down	0.007	13.62
Pacifastin domain	0.197635	Unigene38038_All	146 481 pacifastin light chain precursor [Pacifastacus leniusculus]	0.175	Down	0.0372	12.293
Pacifastin domain	0.197635	Unigene40526_All	13 234 minus strand pacifastin [Eriocheir sinensis]	0.167	Down	0.0322	8.0454
Heat shock protein 70kD, C-terminal domain	0.297027	Unigene15048_All	281 2176 heat shock cognate 70 [Aedes aegypti]	0.830	Down	0.0127	70.079
Heat shock protein 70kD, C-terminal domain	0.297027	Unigene8052_All	1 675 minus strand Hsp70 [Mythimna separata]	0.196	Down	0.0128	24.549
EF-hand domain pair	0.424712	Unigene1271_All	58 513 minus strand Myosin-2 essential light chain [Camponotus floridanus]	0.573	Down	0.00106	17.371
EF-hand domain pair	0.424712	Unigene6286_All	166 834 GK22695 [Drosophila willistoni] >gi|194168244|gb|EDW83145.1| GK22695 [Drosophila willistoni]	0.699	Down	0.0106	25.575
EF-hand domain pair	0.424712	Unigene5487_All	145 672 minus strand Myosin regulatory light chain sqh [Acromyrmex echinatior]	0.756	Down	0.00191	20.279
EF-hand domain pair	0.424712	CL5353.Contig1_All	3 3851 minus strand PREDICTED: intersectin-1-like [Bombus terrestris]	0.813	Down	0.0466	141.17
C-type lectin fold	0.327357	Unigene11807_All	134 766 minus strand C-type lectin 5 precursor [Apis mellifera]	0.609	Down	0.00184	24.039
C-type lectin fold	0.327357	Unigene1460_All	83 691 minus strand PREDICTED: similar to CG3244 CG3244-PA isoform 1 [Tribolium castaneum] >gi|91081903|ref|XP_976065.1| PREDICTED: similar to CG3244 CG3244-PA isoform 2 [Tribolium castaneum]	0.744	Down	0.0258	23.748
