# Supplementary material for: Differential Proteomics Analysis Unraveled Mechanisms of Arma chinensis Responding to Improved Artificial Diet
Source: Insects. 2022 Jul 2;13(7):605. doi: 10.3390/insects13070605 (PMC9319121; doi:10.3390/insects13070605)
Supplement: Supplementary file 1 [file insects-13-00605-s001.zip › Supplementary Table S18.xlsx]

## Sheet: Sheet1
Supplementary Table S18. DEPs associated with different biological characteristics.
Biological characteristics	Protein accession	Protein description	IADA/COSMA Ratio	Regulated Type	IADA/COSMA P value	IADN/COSMN Ratio	Regulated Type	IADN/COSMN P value	MW [kDa]	Subcellular Location	Biological Process	Cellular Component	Molecular Function	KEGG KO No.	KEGG Gene	KEGG pathway	IPR ID	Domain description
Fecundity, egg viability, and sex ratio.	Unigene4622_All	133 2895 minus strand PREDICTED: vitellogenin-6-like [Acyrthosiphon pisum]	1.387	Up	0.00377	1.204	Up	0.00966	105.01	cytosol	transport; lipid transport; single-organism localization; single-organism process; lipid localization; organic substance transport; macromolecule localization; localization; single-organism transport; establishment of localization;		lipid transporter activity; substrate-specific transporter activity; transporter activity;				IPR015819; IPR015816; IPR011030; IPR001747; IPR015255;	Lipid transport protein, beta-sheet shell; Vitellinogen, beta-sheet N-terminal; Vitellinogen, superhelical; Lipid transport protein, N-terminal; Vitellinogen, open beta-sheet;
	Unigene18963_All	39 1007 minus strand vitellogenin [Trigonotylus caelestialium]				1.244	Up	0.00603	37.493	cytosol	transport; lipid transport; single-organism localization; single-organism process; lipid localization; organic substance transport; macromolecule localization; localization; single-organism transport; establishment of localization;		lipid transporter activity; substrate-specific transporter activity; transporter activity;				IPR011030; IPR015819; IPR015817; IPR001747; IPR015255;	Vitellinogen, superhelical; Lipid transport protein, beta-sheet shell; Vitellinogen, open beta-sheet, subdomain 1; Lipid transport protein, N-terminal; Vitellinogen, open beta-sheet;
	Unigene15946_All	72 809 seminal fluid protein CSSFP042 [Chilo suppressalis]				0.525	Down	0.0118	27.822	extracellular							IPR023796;	Serpin domain;
	Unigene41003_All	1 312 minus strand seminal fluid protein CSSFP066 [Chilo suppressalis]	0.430	Down	0.3968	0.211	Down	0.0531	10.985	extracellular
Cannibalism	Unigene17945_All	76 531 minus strand odorant-binding protein RproOBP2 precursor [Rhodnius prolixus]	0.447	Down	0.0081	0.800	Down	0.0272	17.08	extracellular			odorant binding; binding;
	Unigene9705_All	113 637 odorant-binding protein RproOBP6 precursor [Rhodnius prolixus]	1.550	Up	0.00626	1.399	Up	0.00484	18.992	extracellular			odorant binding; binding;
	Unigene20082_All	163 741 odorant binding protein [Bemisia tabaci]	0.774	Down	0.0124	1.670	Up	0.000171	21.923	extracellular			odorant binding; binding;
	CL450.Contig3_All	43 450 odorant-binding protein 3 [Adelphocoris lineolatus]				0.757	Down	0.04	15.023	cytosol			odorant binding; binding;
Developmental time, body length and body weight.	CL1625.Contig4_All	226 657 pupal cuticle protein precursor [Bombyx mori] >gi|1169137|sp|P42852.1|CUPP_BOMMO RecName: Full=Pupal cuticle protein; Flags: Precursor >gi|829163|emb|CAA48756.1| pupal cuticle protein [Bombyx mori] >gi|227891|prf||1713293A pupal cuticle protein	2.650	Up	0.00163	1.311	Up	0.0156	14.308	cytosol
	Unigene18301_All	8 940 GK21628 [Drosophila willistoni] >gi|194159066|gb|EDW73967.1| GK21628 [Drosophila willistoni]	1.255	Up	0.0286	0.602	Down	0.0333	29.651	extracellular			structural constituent of cuticle; structural molecule activity;
	Unigene19992_All	54 722 cuticular protein precursor [Tribolium castaneum]	1.823	Up	0.0104				23.963	extracellular			structural constituent of cuticle; structural molecule activity;
	Unigene20314_All	82 735 minus strand cuticular protein analogous to peritrophins 3-D1 [Danaus plexippus]	1.222	Up	0.00866				23.908	extracellular	glucosamine-containing compound metabolic process; metabolic process; chitin metabolic process; carbohydrate derivative metabolic process; nitrogen compound metabolic process; amino sugar metabolic process; macromolecule metabolic process; aminoglycan metabolic process; organonitrogen compound metabolic process; organic substance metabolic process;	extracellular region;	chitin binding; carbohydrate derivative binding; binding;				IPR002557;	Chitin binding domain;
	Unigene20356_All	32 805 minus strand cuticular protein analogous to peritrophins 3-C5 isoform 1 precursor [Tribolium castaneum] >gi|119387888|gb|ABL73929.1| obstractor C1 [Tribolium castaneum]	1.945	Up	0.0291				28.486	extracellular	glucosamine-containing compound metabolic process; metabolic process; chitin metabolic process; carbohydrate derivative metabolic process; nitrogen compound metabolic process; amino sugar metabolic process; macromolecule metabolic process; aminoglycan metabolic process; organonitrogen compound metabolic process; organic substance metabolic process;	extracellular region;	chitin binding; carbohydrate derivative binding; binding;				IPR002557;	Chitin binding domain;
	Unigene20657_All	7 288 cuticular protein CPR54 [Danaus plexippus]	1.739	Up	0.0081				10.345	nuclear
	Unigene3512_All	57 665 GJ24136 [Drosophila virilis] >gi|194151992|gb|EDW67426.1| GJ24136 [Drosophila virilis]	1.912	Up	0.000544				23.044	extracellular			structural constituent of cuticle; structural molecule activity;
	Unigene3696_All	108 797 minus strand cuticular protein analogous to peritrophins 3-B precursor [Acyrthosiphon pisum]	1.551	Up	0.0287				26.381	extracellular	glucosamine-containing compound metabolic process; metabolic process; chitin metabolic process; carbohydrate derivative metabolic process; nitrogen compound metabolic process; amino sugar metabolic process; macromolecule metabolic process; aminoglycan metabolic process; organonitrogen compound metabolic process; organic substance metabolic process;	extracellular region;	chitin binding; carbohydrate derivative binding; binding;				IPR002557;	Chitin binding domain;
	Unigene4928_All	133 339 minus strand cuticular protein analogous to peritrophins 3-A2 precursor [Tribolium castaneum] >gi|268309020|gb|ACY95476.1| cuticular protein analogous to peritrophins 3-A2 [Tribolium castaneum]	2.334	Up	0.0271				7.4783	extracellular	glucosamine-containing compound metabolic process; metabolic process; chitin metabolic process; carbohydrate derivative metabolic process; nitrogen compound metabolic process; amino sugar metabolic process; macromolecule metabolic process; aminoglycan metabolic process; organonitrogen compound metabolic process; organic substance metabolic process;	extracellular region;	chitin binding; carbohydrate derivative binding; binding;				IPR002557;	Chitin binding domain;
	CL1165.Contig2_All	40 558 PREDICTED: similar to Pupal cuticle protein C1B (TM-C1B) (TM-PCP C1B) [Tribolium castaneum]				0.603	Down	0.00943	17.276	extracellular
	CL1552.Contig1_All	73 567 PREDICTED: similar to Larval cuticle protein A3A (TM-A3A) (TM-LCP A3A) [Tribolium castaneum]				0.695	Down	0.00382	17.083	extracellular			structural constituent of cuticle; structural molecule activity;
	CL2094.Contig1_All	4 519 cuticular protein [Tenebrio molitor]				1.914	Up	0.0237	17.547	cytosol			structural constituent of cuticle; structural molecule activity;
	CL2549.Contig1_All	63 569 minus strand cuticular protein CPR67A [Papilio xuthus]				0.602	Down	0.0434	17.509	extracellular			structural constituent of cuticle; structural molecule activity;
	CL2553.Contig1_All	1 522 PREDICTED: cuticle protein-like [Bombus terrestris]				0.569	Down	0.00149	17.757	mitochondria			structural constituent of cuticle; structural molecule activity;
	CL2553.Contig2_All	34 492 minus strand PREDICTED: similar to Larval cuticle protein A3A (TM-A3A) (TM-LCP A3A) [Tribolium castaneum]				0.768	Down	0.0494	15.739	extracellular			structural constituent of cuticle; structural molecule activity;
	CL2908.Contig1_All	107 484 cuticular protein 58 precursor [Acyrthosiphon pisum] >gi|239792554|dbj|BAH72607.1| ACYPI003073 [Acyrthosiphon pisum]				0.706	Down	0.0461	13.942	extracellular			structural constituent of cuticle; structural molecule activity;
	CL3443.Contig1_All	30 434 PREDICTED: similar to Larval cuticle protein A3A (TM-A3A) (TM-LCP A3A) [Tribolium castaneum]				0.325	Down	0.00177	14.135	extracellular			structural constituent of cuticle; structural molecule activity;
	CL3443.Contig2_All	16 342 cuticular protein CPR71B [Danaus plexippus]				0.312	Down	0.00741	11.316	extracellular			structural constituent of cuticle; structural molecule activity;
	CL4694.Contig1_All	23 247 PREDICTED: similar to Larval cuticle protein A3A (TM-A3A) (TM-LCP A3A) [Tribolium castaneum]				0.298	Down	0.00106	7.8021	extracellular
	CL5055.Contig1_All	41 409 AGAP006864-PA [Anopheles gambiae str. PEST] >gi|55245971|gb|EAA45480.2| AGAP006864-PA [Anopheles gambiae str. PEST]				0.409	Down	0.0319	14.051	extracellular			structural constituent of cuticle; structural molecule activity;
	CL5425.Contig1_All	5 193 PREDICTED: similar to Larval cuticle protein A1A (TM-A1A) (TM-LCP A1A) [Tribolium castaneum]				0.471	Down	0.0169	6.0517	extracellular
	CL881.Contig1_All	53 631 PREDICTED: similar to Larval cuticle protein A3A (TM-A3A) (TM-LCP A3A) [Tribolium castaneum]				0.716	Down	0.0153	19.25	extracellular			structural constituent of cuticle; structural molecule activity;
	Unigene10402_All	25 444 cuticle protein-like protein [Triatoma matogrossensis]				0.312	Down	0.000879	14.391	extracellular			structural constituent of cuticle; structural molecule activity;
	Unigene10803_All	83 427 cuticle protein 34 [Anopheles gambiae] >gi|162532640|gb|ABY16724.1| cuticle protein 34 [Anopheles gambiae]				0.546	Down	0.0134	12.951	cytosol			structural constituent of cuticle; structural molecule activity;
	Unigene10931_All	41 409 AGAP006864-PA [Anopheles gambiae str. PEST] >gi|55245971|gb|EAA45480.2| AGAP006864-PA [Anopheles gambiae str. PEST]				0.446	Down	0.0309	14.067	extracellular			structural constituent of cuticle; structural molecule activity;
	Unigene11479_All	2 199 cuticular protein CPG12 [Papilio xuthus]				0.421	Down	0.00568	6.5154	mitochondria
	Unigene1454_All	105 1130 AGAP000047-PA [Anopheles gambiae str. PEST] >gi|157019024|gb|EAA06220.4| AGAP000047-PA [Anopheles gambiae str. PEST]				1.694	Up	0.00272	35.126	plasma membrane			structural constituent of cuticle; structural molecule activity;
	Unigene1463_All	243 935 minus strand cuticular protein analogous to peritrophins 1-G precursor [Tribolium castaneum] >gi|268309012|gb|ACY95472.1| cuticular protein analogous to peritrophins 1-G [Tribolium castaneum]				0.807	Down	0.0275	27.34	extracellular	glucosamine-containing compound metabolic process; metabolic process; chitin metabolic process; carbohydrate derivative metabolic process; nitrogen compound metabolic process; amino sugar metabolic process; macromolecule metabolic process; aminoglycan metabolic process; organonitrogen compound metabolic process; organic substance metabolic process;	extracellular region;	chitin binding; carbohydrate derivative binding; binding;				IPR002557;	Chitin binding domain;
	Unigene17155_All	1 276 minus strand cuticle protein-like protein [Triatoma matogrossensis]				0.652	Down	0.0437	9.7704	mitochondria			structural constituent of cuticle; structural molecule activity;
	Unigene18261_All	61 675 cuticular protein precursor [Apis mellifera]				0.507	Down	0.00795	21.741	cytosol
	Unigene20293_All	71 658 Cuticle protein 19 [Acromyrmex echinatior]				1.578	Up	0.0149	21.501	extracellular			structural constituent of cuticle; structural molecule activity;
	Unigene20546_All	2 244 minus strand cuticle protein-like protein [Triatoma matogrossensis]				0.514	Down	0.00927	8.0703	cytosol			structural constituent of cuticle; structural molecule activity;
	Unigene2320_All	48 491 cuticular protein RR-1 motif 32 [Danaus plexippus]				1.231	Up	0.0471	15.858	extracellular			structural constituent of cuticle; structural molecule activity;
	Unigene310_All	30 401 cuticular protein RR-2 motif 79 [Danaus plexippus]				0.441	Down	0.000205	13.412	mitochondria			structural constituent of cuticle; structural molecule activity;
	Unigene3340_All	77 754 minus strand cuticular protein precursor [Apis mellifera]				0.367	Down	0.0116	21.432	cytosol
	Unigene4477_All	7 921 minus strand glycine-rich cuticle protein [Apis mellifera]				0.708	Down	0.00971	28.049	extracellular							IPR004145;	Domain of unknown function DUF243;
	Unigene5823_All	93 824 minus strand AGAP006261-PA [Anopheles gambiae str. PEST] >gi|157016133|gb|EAL40041.3| AGAP006261-PA [Anopheles gambiae str. PEST]				0.665	Down	0.0124	27.24	extracellular			structural constituent of cuticle; structural molecule activity;
	Unigene7560_All	190 531 GH20692 [Drosophila grimshawi] >gi|193902147|gb|EDW01014.1| GH20692 [Drosophila grimshawi]				1.421	Up	0.00176	12.391	cytosol, nuclear			structural constituent of cuticle; structural molecule activity;
