# Supplementary material for: Differential Proteomics Analysis Unraveled Mechanisms of Arma chinensis Responding to Improved Artificial Diet
Source: Insects. 2022 Jul 2;13(7):605. doi: 10.3390/insects13070605 (PMC9319121; doi:10.3390/insects13070605)
Supplement: Supplementary file 1 [file insects-13-00605-s001.zip › Supplementary Table S19.xlsx]

## Sheet: Sheet1
Supplementary Table S19. DEPs associated with nutrients in improved artificial diet.
Nutrients	Protein accession	Protein description	IADA/COSMA Ratio	Regulated Type	IADA/COSMA P value	IADN/COSMN Ratio	Regulated Type	IADN/COSMN P value	MW [kDa]	Subcellular Location	Biological Process	Cellular Component	Molecular Function	KEGG KO No.	KEGG Gene	KEGG pathway	IPR ID	Domain description
Inositol	Unigene7928_All	69 893 minus strand Inositol monophosphatase [Camponotus floridanus]	1.292	Up	0.0305				30.38	plasma membrane	phosphorylation; glycerolipid metabolic process; organic hydroxy compound metabolic process; organophosphate catabolic process; alcohol metabolic process; phosphatidylinositol phosphorylation; single-organism process; cellular lipid metabolic process; alcohol catabolic process; cellular metabolic process; phosphate-containing compound metabolic process; organic substance metabolic process; metabo…		inositol phosphate phosphatase activity; hydrolase activity; inositol monophosphate phosphatase activity; inositol monophosphate 1-phosphatase activity; catalytic activity; phosphoric ester hydrolase activity; phosphatase activity; hydrolase activity, acting on ester bonds;	K01092	E3.1.3.25; myo-inositol-1(or 4)-monophosphatase [EC:3.1.3.25]	dme00562 Inositol phosphate metabolism - Drosophila melanogaster (fruit fly); dme04070 Phosphatidylinositol signaling system - Drosophila melanogaster (fruit fly); dme01100 Metabolic pathways - Drosophila melanogaster (fruit fly);
	Unigene20124_All	164 940 minus strand Inositol monophosphatase [Camponotus floridanus]				1.218	Up	0.0213	28.584	cytosol	phosphorylation; glycerolipid metabolic process; organic hydroxy compound metabolic process; organophosphate catabolic process; alcohol metabolic process; phosphatidylinositol phosphorylation; single-organism process; cellular lipid metabolic process; alcohol catabolic process; cellular metabolic process; phosphate-containing compound metabolic process; organic substance metabolic process; metabo…		inositol phosphate phosphatase activity; hydrolase activity; inositol monophosphate phosphatase activity; inositol monophosphate 1-phosphatase activity; catalytic activity; phosphoric ester hydrolase activity; phosphatase activity; hydrolase activity, acting on ester bonds;	K01092	E3.1.3.25; myo-inositol-1(or 4)-monophosphatase [EC:3.1.3.25]	dme00562 Inositol phosphate metabolism - Drosophila melanogaster (fruit fly); dme04070 Phosphatidylinositol signaling system - Drosophila melanogaster (fruit fly); dme01100 Metabolic pathways - Drosophila melanogaster (fruit fly);
Pyridoxine	Unigene13854_All	213 746 PREDICTED: pyridoxine/pyridoxamine 5'-phosphate oxidase-like [Acyrthosiphon pisum]				0.725	Down	0.00625	20.762	mitochondria	vitamin biosynthetic process; cellular aromatic compound metabolic process; organic hydroxy compound metabolic process; single-organism process; biosynthetic process; organonitrogen compound biosynthetic process; pyridine-containing compound metabolic process; cellular metabolic process; organic substance metabolic process; pyridine-containing compound biosynthetic process; metabolic process; vit…		pyridoxamine-phosphate oxidase activity; nucleoside phosphate binding; ion binding; nucleotide binding; cofactor binding; oxidoreductase activity; heterocyclic compound binding; organic cyclic compound binding; carbohydrate derivative binding; catalytic activity; ribonucleotide binding; binding; anion binding; oxidoreductase activity, acting on the CH-NH2 group of donors; oxidoreductase activity,…				IPR012349; IPR011576;	FMN-binding split barrel; Pyridoxamine 5'-phosphate oxidase-like, FMN-binding domain;
Riboflavin	Unigene17940_All	166 618 minus strand PREDICTED: similar to riboflavin kinase [Ciona intestinalis]	1.281	Up	0.0307				17.228	cytosol	vitamin biosynthetic process; heterocycle biosynthetic process; single-organism biosynthetic process; riboflavin biosynthetic process; small molecule metabolic process; single-organism cellular process; single-organism process; organic cyclic compound metabolic process; nitrogen compound metabolic process; biosynthetic process; flavin-containing compound biosynthetic process; organonitrogen compo…		kinase activity; phosphotransferase activity, alcohol group as acceptor; riboflavin kinase activity; catalytic activity; transferase activity; transferase activity, transferring phosphorus-containing groups;	K00861	RFK; riboflavin kinase [EC:2.7.1.26]	dme00740 Riboflavin metabolism - Drosophila melanogaster (fruit fly); dme01100 Metabolic pathways - Drosophila melanogaster (fruit fly);	IPR023465; IPR015865;	Riboflavin kinase domain; Riboflavin kinase domain, bacterial/eukaryotic;
Thiamine	Unigene20154_All	11 520 PREDICTED: similar to thiamin pyrophosphokinase 1 [Tribolium castaneum]				1.406	Up	0.000291	18.827	cytosol	cofactor biosynthetic process; cellular aromatic compound metabolic process; single-organism process; biosynthetic process; thiamine diphosphate biosynthetic process; organonitrogen compound biosynthetic process; thiamine metabolic process; cellular metabolic process; phosphate-containing compound metabolic process; sulfur compound biosynthetic process; thiamine diphosphate metabolic process; org…		thiamine binding; ATP binding; nucleoside phosphate binding; vitamin binding; nucleoside binding; ion binding; nucleotide binding; sulfur compound binding; heterocyclic compound binding; organic cyclic compound binding; ribonucleoside binding; carbohydrate derivative binding; catalytic activity; ribonucleotide binding; binding; purine ribonucleoside binding; thiamine diphosphokinase activity; dip…	K00949	thiN; thiamine pyrophosphokinase [EC:2.7.6.2]	dme00730 Thiamine metabolism - Drosophila melanogaster (fruit fly); dme01100 Metabolic pathways - Drosophila melanogaster (fruit fly);	IPR007373; IPR007371;	Thiamin pyrophosphokinase, vitamin B1-binding domain; Thiamin pyrophosphokinase, catalytic domain;
sugar	CL2044.Contig1_All	1 1365 minus strand PREDICTED: fatty acid synthase-like isoform 1 [Nasonia vitripennis]	0.725	Down	0.00618				50.598	cytosol	metabolic process;		transferase activity; catalytic activity;				IPR016035; IPR001227; IPR014043; IPR020807; IPR020801; IPR016036;	Acyl transferase/acyl hydrolase/lysophospholipase; Acyl transferase domain; Acyl transferase; Polyketide synthase, dehydratase domain; Polyketide synthase, acyl transferase domain; Malonyl-CoA ACP transacylase, ACP-binding;
	CL355.Contig1_All	3 3932 PREDICTED: fatty acid synthase-like isoform 1 [Acyrthosiphon pisum]	0.662	Down	0.00132				144.71	cytosol	single-organism process; biosynthetic process; metabolic process; oxidation-reduction process; single-organism metabolic process;		S-acyltransferase activity; enoyl-[acyl-carrier-protein] reductase (NADPH, B-specific) activity; oxidoreductase activity, acting on the CH-CH group of donors, NAD or NADP as acceptor; hydrolase activity; carbon-oxygen lyase activity; oxidoreductase activity, acting on CH-OH group of donors; acyl-[acyl-carrier-protein] hydrolase activity; oxidoreductase activity, acting on the CH-OH group of donor…	K00665	FASN; fatty acid synthase, animal type [EC:2.3.1.85]	dme00061 Fatty acid biosynthesis - Drosophila melanogaster (fruit fly); dme01212 Fatty acid metabolism - Drosophila melanogaster (fruit fly); dme01100 Metabolic pathways - Drosophila melanogaster (fruit fly);	IPR029058; IPR013149; IPR020806; IPR023102; IPR011032; IPR020843; IPR001031; IPR009081; IPR016040; IPR013968;	Alpha/Beta hydrolase fold; Alcohol dehydrogenase, C-terminal; Polyketide synthase, phosphopantetheine-binding domain; Fatty acid synthase, domain 2; GroES-like; Polyketide synthase, enoylreductase domain; Thioesterase; Phosphopantetheine binding ACP domain; NAD(P)-binding domain; Polyketide synthase, ketoreductase domain;
	Unigene17035_All	5 2059 PREDICTED: fatty acid synthase-like [Acyrthosiphon pisum]				1.324	Up	0.0498	76.457	cytosol	biosynthetic process; metabolic process;		phosphopantetheine binding; vitamin binding; modified amino acid binding; catalytic activity; binding; hydrolase activity, acting on ester bonds; ion binding; hydrolase activity; anion binding; amide binding; small molecule binding;				IPR020806; IPR029058; IPR016040; IPR001031; IPR009081; IPR013968;	Polyketide synthase, phosphopantetheine-binding domain; Alpha/Beta hydrolase fold; NAD(P)-binding domain; Thioesterase; Phosphopantetheine binding ACP domain; Polyketide synthase, ketoreductase domain;
	Unigene24692_All	10 384 minus strand PREDICTED: fatty acid synthase-like [Acyrthosiphon pisum]				1.309	Up	0.0236	14.242	cytosol, nuclear							IPR020807;	Polyketide synthase, dehydratase domain;
protein	CL184.Contig3_All	103 984 minus strand secreted salivary trypsin [Triatoma matogrossensis]	2.021	Up	0.0175	2.170	Up	0.00485	32.214	cytosol	proteolysis; metabolic process; macromolecule metabolic process; protein metabolic process; primary metabolic process; organic substance metabolic process;		serine-type endopeptidase activity; endopeptidase activity; peptidase activity; catalytic activity; serine hydrolase activity; serine-type peptidase activity; peptidase activity, acting on L-amino acid peptides; hydrolase activity;				IPR009003; IPR001254;	Peptidase S1, PA clan; Serine proteases, trypsin domain;
	Unigene2103_All	161 1036 minus strand secreted salivary trypsin [Triatoma matogrossensis]	1.650	Up	0.0126				32.091	cytosol	proteolysis; metabolic process; macromolecule metabolic process; protein metabolic process; primary metabolic process; organic substance metabolic process;		serine-type endopeptidase activity; endopeptidase activity; peptidase activity; catalytic activity; serine hydrolase activity; serine-type peptidase activity; peptidase activity, acting on L-amino acid peptides; hydrolase activity;				IPR009003; IPR001254;	Peptidase S1, PA clan; Serine proteases, trypsin domain;
	Unigene21122_All	2 172 minus strand RecName: Full=Metallothionein-1F; Short=MT-1F; AltName: Full=Metallothionein-IF; Short=MT-IF >gi|1827466|dbj|BAA19182.1| metallothionein isoform [Sus scrofa]	3.165	Up	0.0163	5.192	Up	0.00155	5.4836	extracellular			metal ion binding; cation binding; binding; ion binding;				IPR023587; IPR017854;	Metallothionein domain, vertebrate; Metallothionein domain;
	Unigene28901_All	2 229 minus strand albumin [Sus scrofa]	4.611	Up	0.0354	5.731	Up	0.0312	8.5354	extracellular		extracellular space; extracellular region part; extracellular region;					IPR020858; IPR014760;	Serum albumin-like; Serum albumin, N-terminal;
	Unigene32074_All	3 674 minus strand albumin [Sus scrofa domesticus]	3.403	Up	0.00578	3.836	Up	0.00635	25.238	extracellular		extracellular space; extracellular region part; extracellular region;					IPR020858; IPR014760;	Serum albumin-like; Serum albumin, N-terminal;
